# Supplementary material
Source: PubMed Central journal article supplement (PMC8393306)
Supplement: sj-pdf-1-jcb-10.1177_0271678X211012836.pdf [file sj-pdf-1-jcb-10.1177_0271678X211012836.pdf]

https://neuromancer-seung-

import.appspot.com/#!%7B%22layers%22:%5B%7B%22source%22:%22precomputed://gs://microns\_public\_datasets/pinky100\_v0/son\_of\_alignment\_v15\_rechunked%22%2C%22type%22:%22image%22%2C%22opacity%22:0.48%2C%22blend%22:%22default%22%2C%22shaderControls%22:%7B%7D%2C%22name%22:%22EM%22%7D%2C%7B%22annotationColor%22:%22#000000%22%2C%22source%22:%22precomputed://gs://microns\_public\_datasets/pinky100\_v185/seg%22%2C%22type%22:%22segmentation%22%2C%22selectedAlpha%22:0.04%2C%22notSelectedAlpha%22:0.16%2C%22saturation%22:0.33%2C%22objectAlpha%22:0.15%2C%22hideSegmentZero%22:false%2C%22segments%22:%5B%220%22%2C%22648518346349526102%22%2C%225D%2C%22skeletonRendering%22:%7B%22mode2d%22:%22lines\_and\_points%22%2C%22mode3d%22:%22lines%22%7D%2C%22name%22:%22seg%20v185%22%7D%2C%7B%22tool%22:%22annotateLine%22%2C%22type%22:%22annotation%22%2C%22annotations%22:%5B%7B%22center%22:%5B52553%2C62619%2C1153%5D%2C%22radii%22:%5B743%2C743%2C74%5D%2C%22type%22:%22ellipsoid%22%2C%22id%22:%221485f27ae0c56327f3f29130efc41b986508ad8f%22%2C%22tagIds%22:%5B%5D%7D%2C%7B%22center%22:%5B74278%2C71947%2C684%5D%2C%22radii%22:%5B851%2C851%2C85%5D%2C%22type%22:%22ellipsoid%22%2C%22id%22:%22a3b3b45246ce67063e3d05d39bae3be15b7cb8e9%22%2C%22tagIds%22:%5B%5D%7D%2C%7B%22center%22:%5B64668%2C46653%2C2128%5D%2C%22radii%22:%5B875%2C875%2C87%5D%2C%22type%22:%22ellipsoid%22%2C%22id%22:%22144e4ceb72e754d8f2a1fa5b046cdfb4554dec1%22%2C%22tagIds%22:%5B%5D%7D%2C%7B%22center%22:%5B91684%2C53632%2C713%5D%2C%22radii%22:%5B939%2C939%2C94%5D%2C%22type%22:%22ellipsoid%22%2C%22id%22:%229ac6128128588dcb352e95b0d7911e653bb7eb49%22%2C%22tagIds%22:%5B%5D%7D%2C%7B%22center%22:%5B94172%2C51023%2C1830%5D%2C%22radii%22:%5B854%2C854%2C85%5D%2C%22type%22:%22ellipsoid%22%2C%22id%22:%2261fccf4f15b8a0dd3b6bb8a744b2bf745149aebb%22%2C%22tagIds%22:%5B%5D%7D%5D%2C%22annotationTags%22:%5B%5D%2C%22voxelSize%22:%5B4%2C4%2C40%5D%2C%22bracketShortcutsShowSegmentation%22:false%2C%22annotationSelectionShowsSegmentation%22:false%2C%22name%22:%22Per%20Nucleus%22%7D%2C%7B%22tool%22:%22annotatePoint%22%2C%22selectedAnnotation%22:%7B%22id%22:%22533eff6a2677ac78db4f098def2b4153cfab1533%22%7D%2C%22annotationColor%22:%22#ffffff%22%2C%22type%22:%22annotation%22%2C%22annotations%22:%5B%7B%22point%22:%5B53354%2C64721%2C1175%5D%2C%22type%22:%22point%22%2C%22id%22:%2296edc3029f09f2be2b15ec1ad529607e955c1097%22%2C%22description%22:%22soma%20peg%5Cn%22%2C%22tagIds%22:%5B%5D%7D%2C%7B%22point%22:%5B53029%2C64266%2C1190%5D%2C%22type%22:%22point%22%2C%22id%22:%22f662983ef0d0f73627c0075ae8c8546f326a2e85%22%2C%22description%22:%22soma%20peg%5Cn%22%2C%22tagIds%22:%5B%5D%7D%2C%7B%22point%22:%5B53335%2C64559%2C1171%5D%2C%22type%22:%22point%22%2C%22id%22:%220e28e4777859b7522a77a2f348340876ff6b55c1%22%2C%22description%22:%22soma%20peg%5Cn%22%2C%22tagIds%22:%5B%5D%7D%2C%7B%22point%22:%5B53747%2C63761%2C1205%5D%2C%22type%22:%22point%22%2C%22id%22:%221ae7965b3df4ad66dd675eab84d37785f4cbcef6%22%2C%22description%22:%22soma%20peg%5Cn%22%2C%22tagIds%22:%5B%5D%7D%2C%7B%22point%22:%5B51340%2C62707%2C1249%5D%2C%22type%22:%22point%22%2C%22id%22:%2210c226961c367f2030bc1d15cbe0bb879d6b7ac3%22%2C%22description%22:%22soma%20peg%5Cn%22%2C%22tagIds%22:%5B%5D%7D%2C%7B%22point%22:%5B50534%2C60736%2C1355%5D%2C%22type%22:%22point%22%2C%22id%22:%2299646d5ce8250a5794cf492cc2cbb50fae8c6e57%22%2C%22description%22:%22distal%20peg%22%2C%22tagIds%22:%5B%5D%7D%2C%7B%22point%22:%5B54050%2C63909%2C1236%5D%2C%22type%22:%22point%22%2C%22id%22:%22a7186d07733ce750752682d48abf6ced04ce7dd3%22%2C%22description%22:%22soma%20peg%22%2C%22tagIds%22:%5B%5D%7D

%2C%7B%22point%22:%5B54372%2C64216%2C1189%5D%2C%22type%22:%22point%22%2C%22id%22:  
:%2279869832ff468bff10140aaeef363b7fc4820e2%22%2C%22description%22:%22soma%20peg%22%  
2C%22tagIds%22:%5B%5D%7D%2C%7B%22point%22:%5B51964%2C61777%2C1216%5D%2C%22type%  
22:%22point%22%2C%22id%22:%2204c15b0c5f7f529a57dc599e8567b12c1dcec02f%22%2C%22descript  
ion%22:%22soma%20peg%22%2C%22tagIds%22:%5B%5D%7D%2C%7B%22point%22:%5B50467%2C613  
73%2C1216%5D%2C%22type%22:%22point%22%2C%22id%22:%229e51b7383349a4fbce8676449229fc  
7b0dc0509b%22%2C%22description%22:%22soma%20peg%22%2C%22tagIds%22:%5B%5D%7D%2C%7  
B%22point%22:%5B50619%2C61239%2C1168%5D%2C%22type%22:%22point%22%2C%22id%22:%2249  
38b1ad201884fdce5e87a1c0b65c2f0bbcddda%22%2C%22description%22:%22distal%20peg%5Cn%22%  
2C%22tagIds%22:%5B%5D%7D%2C%7B%22point%22:%5B54779%2C65519%2C1067%5D%2C%22type%  
22:%22point%22%2C%22id%22:%22e3cffbf31445614d2f26be903115044fbf5eb97e%22%2C%22descript  
ion%22:%22distal%20peg%22%2C%22tagIds%22:%5B%5D%7D%2C%7B%22point%22:%5B53874%2C653  
42%2C1168%5D%2C%22type%22:%22point%22%2C%22id%22:%22442c410cb4c538d06b1b44779022b5  
c00487a592%22%2C%22description%22:%22distal%20peg%5Cn%22%2C%22tagIds%22:%5B%5D%7D%2  
C%7B%22point%22:%5B51629%2C61145%2C1288%5D%2C%22type%22:%22point%22%2C%22id%22:%  
2272359d638c2deea0f8dd700cb50bdf956b333c66%22%2C%22description%22:%22distal%20peg%5Cn  
%22%2C%22tagIds%22:%5B%5D%7D%2C%7B%22point%22:%5B50357%2C61314%2C1287%5D%2C%22t  
ype%22:%22point%22%2C%22id%22:%223166dc4cac488f69d220e5c36088b8000b24fce5%22%2C%22d  
escription%22:%22distal%20peg%22%2C%22tagIds%22:%5B%5D%7D%2C%7B%22point%22:%5B49856  
%2C60381%2C1395%5D%2C%22type%22:%22point%22%2C%22id%22:%22fb25e4bd5c2249629fa95390  
b641e8ead70eb28d%22%2C%22description%22:%22distal%20peg%22%2C%22tagIds%22:%5B%5D%7D  
%2C%7B%22point%22:%5B49844%2C59853%2C1419%5D%2C%22type%22:%22point%22%2C%22id%22  
:%22d27ad7af26c8e88460b13a2037dec25b348b2a8c%22%2C%22description%22:%22distal%20peg%22  
%2C%22tagIds%22:%5B%5D%7D%2C%7B%22point%22:%5B51225%2C60596%2C1460%5D%2C%22type  
%22:%22point%22%2C%22id%22:%2249b6e342a1f9fed154a35eab2960ccaff4328e46%22%2C%22descri  
ption%22:%22soma%20peg%5Cn%22%2C%22tagIds%22:%5B%5D%7D%2C%7B%22point%22:%5B50185  
%2C59448%2C1443%5D%2C%22type%22:%22point%22%2C%22id%22:%22e52d96cd58eca7db70b2d77  
4bfbbd7e70868b0d2%22%2C%22description%22:%22distal%20peg%22%2C%22tagIds%22:%5B%5D%7D  
%2C%7B%22point%22:%5B48292.6171875%2C56258.9453125%2C1743.006103515625%5D%2C%22typ  
e%22:%22point%22%2C%22id%22:%2271f8113d030f41553ea9b210a1ea1e6a93ea8787%22%2C%22tagl  
ds%22:%5B%5D%7D%2C%7B%22point%22:%5B49457.99609375%2C58848.41015625%2C1601.6739501  
953125%5D%2C%22type%22:%22point%22%2C%22id%22:%22fd6d9a41ad1a79f7a53cd9d2025f57de5a  
2e96f2%22%2C%22tagIds%22:%5B%5D%7D%2C%7B%22point%22:%5B53722.6171875%2C63720.01171  
875%2C1209.4847412109375%5D%2C%22type%22:%22point%22%2C%22id%22:%22a7dd4425e9d7747  
95ee02a5ba171f9ce7af19999%22%2C%22tagIds%22:%5B%5D%7D%2C%7B%22point%22:%5B57862.73  
828125%2C68158.1796875%2C803.25390625%5D%2C%22type%22:%22point%22%2C%22id%22:%22bff  
d7572be22601fecb6ad3e6b47a00a024be6c4%22%2C%22tagIds%22:%5B%5D%7D%2C%7B%22point%2  
2:%5B59144.3984375%2C68770.28125%2C868.25390625%5D%2C%22type%22:%22point%22%2C%22id  
%22:%223b685ab5ec316f821f6aa9991a8d40b150e8a3ec%22%2C%22tagIds%22:%5B%5D%7D%2C%7B  
%22point%22:%5B51005.12890625%2C60719.44921875%2C1355%5D%2C%22type%22:%22point%22%  
2C%22id%22:%2297603536adc0f123e167c3aef5d31bdb2ce8ee62%22%2C%22tagIds%22:%5B%5D%7D  
%2C%7B%22point%22:%5B50443.48828125%2C61191.1015625%2C1293%5D%2C%22type%22:%22poin  
t%22%2C%22id%22:%220381def702c011163753a6b730be83497756fee3%22%2C%22tagIds%22:%5B%5  
D%7D%2C%7B%22point%22:%5B50861.54296875%2C59937.12109375%2C1470%5D%2C%22type%22:

%22point%22%2C%22id%22:%22adb334a1d5c8f369d57c88aba47af9f57b861012%22%2C%22tagIds%22:  
:%22%5B%5D%7D%2C%7B%22point%22:%22%5B51012.8125%2C60727.921875%2C1355%5D%2C%22type%22:  
%22point%22%2C%22id%22:%222533eff6a2677ac78db4f098def2b4153cfab1533%22%2C%22tagIds%22:  
%22%5B%5D%7D%5D%2C%22annotationTags%22:%22%5B%5D%2C%22voxelSize%22:%22%5B4%2C4%2C40%5D%2  
C%22bracketShortcutsShowSegmentation%22:false%2C%22annotationSelectionShowsSegmentation%2  
2:false%2C%22name%22:%22Pericyte%201%22%7D%2C%7B%22tool%22:%22annotateCollection%22%  
2C%22selectedAnnotation%22:%22%7B%22id%22:%2220e24e984be23419708e50a0879b5027e705ec2af%22  
%7D%2C%22annotationColor%22:%22#00affa%22%2C%22type%22:%22annotation%22%2C%22annotat  
ions%22:%22%5B%7B%22point%22:%22%5B64298%2C47171%2C2160%5D%2C%22type%22:%22point%22%2C  
%22id%22:%22f718fed982711913f7bf2ec6c8adb9aff0d8a949%22%2C%22description%22:%22soma%20  
peg%22%2C%22tagIds%22:%22%5B%5D%7D%2C%7B%22point%22:%22%5B64359%2C47075%2C2167%5D%2C  
%22type%22:%22point%22%2C%22id%22:%22c9a1cfc56d8f9bd3c5ea416fdfd2ab5b76f3f435%22%2C%  
22description%22:%22soma%20peg%22%2C%22tagIds%22:%22%5B%5D%7D%2C%7B%22point%22:%22%5B644  
75%2C47564%2C2147%5D%2C%22type%22:%22point%22%2C%22id%22:%2228cfa4629da6f81fd9507ca  
a7e4f6b60b355480fd%22%2C%22description%22:%22soma%20peg%22%2C%22tagIds%22:%22%5B%5D%7  
D%2C%7B%22point%22:%22%5B65350%2C45997%2C2159%5D%2C%22type%22:%22point%22%2C%22id%  
22:%22274d80e7c3afcc2b0a2d64d8b3f537d4ab629513%22%2C%22description%22:%22soma%20peg%  
22%2C%22tagIds%22:%22%5B%5D%7D%2C%7B%22point%22:%22%5B65761%2C45999%2C2158%5D%2C%22ty  
pe%22:%22point%22%2C%22id%22:%222466c327b08d5a4f3fe94d9db47905850f82262ca%22%2C%22de  
scription%22:%22soma%20peg%22%2C%22tagIds%22:%22%5B%5D%7D%2C%7B%22point%22:%22%5B65891%  
2C46001%2C2156%5D%2C%22type%22:%22point%22%2C%22id%22:%22dbd31867894f0d13d84b0e99  
7160a26593b73c04%22%2C%22description%22:%22soma%20peg%22%2C%22tagIds%22:%22%5B%5D%7D  
%2C%7B%22point%22:%22%5B66655%2C46025%2C2130%5D%2C%22type%22:%22point%22%2C%22id%22  
:%2224cf430342ce6ce1cd847b7f22bed3fae518fac0e%22%2C%22description%22:%22soma%20peg%22%  
2C%22tagIds%22:%22%5B%5D%7D%2C%7B%22point%22:%22%5B65900%2C45884%2C2129%5D%2C%22type%  
22:%22point%22%2C%22id%22:%2223e44911143b7229075514ee8a4a2e91f35fea328%22%2C%22descri  
ption%22:%22soma%20peg%22%2C%22tagIds%22:%22%5B%5D%7D%2C%7B%22point%22:%22%5B65632%2C4  
5985%2C2157%5D%2C%22type%22:%22point%22%2C%22id%22:%2225c1bae4cf8c0f470e365eca26b347  
bc0435085d8%22%2C%22description%22:%22soma%20peg%22%2C%22tagIds%22:%22%5B%5D%7D%2C%7  
B%22point%22:%22%5B66458%2C46014%2C2173%5D%2C%22type%22:%22point%22%2C%22id%22:%222d6  
3e0ea4c289323ca8745a4fff5803563719f348%22%2C%22description%22:%22soma%20peg%22%2C%22  
tagIds%22:%22%5B%5D%7D%2C%7B%22point%22:%22%5B65810%2C45419%2C2107%5D%2C%22type%22:%22  
point%22%2C%22id%22:%222a89233c2ce63a8c51e9e6ca80cc6b56e18dc5d5d%22%2C%22description%2  
2:%22distal%20peg%5Cn%22%2C%22tagIds%22:%22%5B%5D%7D%2C%7B%22point%22:%22%5B65852%2C45  
24%2C2091%5D%2C%22type%22:%22point%22%2C%22id%22:%2228f8e122ac65c7c3c643efdc0be582ae  
c0f7d6d5e%22%2C%22description%22:%22distal%20peg%22%2C%22tagIds%22:%22%5B%5D%7D%2C%7B%  
22point%22:%22%5B65856%2C45430%2C2089%5D%2C%22type%22:%22point%22%2C%22id%22:%222bff06  
7722b0910fac45543d44491663d91047b55%22%2C%22description%22:%22distal%20peg%22%2C%22ta  
glds%22:%22%5B%5D%7D%2C%7B%22point%22:%22%5B65937%2C45898%2C2105%5D%2C%22type%22:%22p  
oint%22%2C%22id%22:%222cc8f55bf059a3d61ff955df4e3c861682ba89a9b%22%2C%22description%22:  
%22distal%20peg%5Cn%22%2C%22tagIds%22:%22%5B%5D%7D%2C%7B%22point%22:%22%5B63950%2C48420  
%2C2022%5D%2C%22type%22:%22point%22%2C%22id%22:%2229af982438307a25c7904564863753da6  
8374fd46%22%2C%22tagIds%22:%22%5B%5D%7D%2C%7B%22point%22:%22%5B63929%2C48459%2C2017%5  
D%2C%22type%22:%22point%22%2C%22id%22:%222068255ab99f55959dcf87dbd7bbfb5ff73748095%22

%2C%22tagIds%22:%5B%5D%7D%2C%7B%22point%22:%5B63623%2C48568%2C1987%5D%2C%22type%22:%22point%22%2C%22id%22:%22ec0cfc49318bf7b0988996e8142b8085f8cf5fd%22%2C%22tagIds%22:%5B%5D%7D%2C%7B%22point%22:%5B63671%2C48158%2C2032%5D%2C%22type%22:%22point%22%2C%22id%22:%22169caa36857e32122c97bac54a37775fbf95f770%22%2C%22tagIds%22:%5B%5D%7D%2C%7B%22point%22:%5B63840%2C48185%2C2047%5D%2C%22type%22:%22point%22%2C%22id%22:%22dc153488ae1a1d99081d2c5538ed0cef6f75853a%22%2C%22tagIds%22:%5B%5D%7D%2C%7B%22point%22:%5B63959%2C48278%2C2046%5D%2C%22type%22:%22point%22%2C%22id%22:%22dd5254912171f158b343d233b709f097380aab4e%22%2C%22tagIds%22:%5B%5D%7D%2C%7B%22point%22:%5B64116%2C48345%2C2051%5D%2C%22type%22:%22point%22%2C%22id%22:%22145bd10cc9ba8dfcb94a10a1a6a646eb3e960cbd%22%2C%22tagIds%22:%5B%5D%7D%2C%7B%22point%22:%5B63894%2C48085%2C2053%5D%2C%22type%22:%22point%22%2C%22id%22:%2278351d0778de5eb74a9d2870b59d9a4ffc6a5000%22%2C%22tagIds%22:%5B%5D%7D%2C%7B%22point%22:%5B64095%2C47995%2C2076%5D%2C%22type%22:%22point%22%2C%22id%22:%22c627938f5eb1d598871f46f41b22b9ac7300421d%22%2C%22tagIds%22:%5B%5D%7D%2C%7B%22point%22:%5B64158%2C47942%2C2084%5D%2C%22type%22:%22point%22%2C%22id%22:%22a50dc568603a4bd821a21dfe2d074a815a04e46e%22%2C%22tagIds%22:%5B%5D%7D%2C%7B%22point%22:%5B64354%2C48193%2C2086%5D%2C%22type%22:%22point%22%2C%22id%22:%2225133476a5fe8239454f0da9e03fba180d37b6a3%22%2C%22tagIds%22:%5B%5D%7D%2C%7B%22point%22:%5B64627%2C47919%2C2149%5D%2C%22type%22:%22point%22%2C%22id%22:%22ffa0c84bc5079a316c7f0c13c53d84aa807481dd%22%2C%22description%22:%22soma%20peg%22%2C%22tagIds%22:%5B%5D%7D%2C%7B%22point%22:%5B64501%2C47626%2C2143%5D%2C%22type%22:%22point%22%2C%22id%22:%22ce72e40582f26eb47b4ac949035acce6b6ac1fb7%22%2C%22description%22:%22soma%20peg%22%2C%22tagIds%22:%5B%5D%7D%2C%7B%22point%22:%5B64390%2C47658%2C2131%5D%2C%22type%22:%22point%22%2C%22id%22:%229566bb797e3e86a7e5c99a82bdf8645cc43b1b7%22%2C%22description%22:%22soma%20peg%22%2C%22tagIds%22:%5B%5D%7D%2C%7B%22point%22:%5B64485%2C47788%2C2128%5D%2C%22type%22:%22point%22%2C%22id%22:%2269c70d5da1bbe936d65777749307382b94d975a5%22%2C%22description%22:%22soma%20peg%22%2C%22tagIds%22:%5B%5D%7D%2C%7B%22point%22:%5B64437%2C47749%2C2128%5D%2C%22type%22:%22point%22%2C%22id%22:%2274872b4c634f997a70fcc59d7a4c30a0c147a4e9%22%2C%22description%22:%22soma%20peg%22%2C%22tagIds%22:%5B%5D%7D%2C%7B%22point%22:%5B65820%2C45979%2C2129%5D%2C%22type%22:%22point%22%2C%22id%22:%226bad05425390745c214f6b191a2d1112a2877515%22%2C%22description%22:%22soma%20peg%22%2C%22tagIds%22:%5B%5D%7D%2C%7B%22point%22:%5B67127%2C45959%2C2125%5D%2C%22type%22:%22point%22%2C%22id%22:%2270e0fbd5c5264aec3ba3b3243239747afcbaad73%22%2C%22description%22:%22soma%20peg%22%2C%22tagIds%22:%5B%5D%7D%2C%7B%22point%22:%5B64424%2C47534%2C2134%5D%2C%22type%22:%22point%22%2C%22id%22:%22ea4ea23338374d60a4e293bdacd9da31c21d1144%22%2C%22description%22:%22soma%20peg%22%2C%22tagIds%22:%5B%5D%7D%2C%7B%22point%22:%5B64416%2C47184%2C2176%5D%2C%22type%22:%22point%22%2C%22id%22:%2276b1e1a0fa8aa37672801d0c263f0459385780e9%22%2C%22description%22:%22soma%20peg%22%2C%22tagIds%22:%5B%5D%7D%2C%7B%22point%22:%5B64423%2C47336%2C2145%5D%2C%22type%22:%22point%22%2C%22id%22:%225c079184748b1bd565560644886a9129c8356ff0%22%2C%22description%22:%22soma%20peg%22%2C%22tagIds%22:%5B%5D%7D%2C%7B%22point%22:%5B66109.1484375%2C46057.078125%2C2163%5D%2C%22type%22:%22point%22%2C%22id%22:%22b55d89be9caf314de3db6c4b80626ebf58029ad2%22%2C%22tagIds%22:%5B%5D%7D%2C%7B%22point%22:%5B66569.7109375%2C46030.8671875%2C2145%5D%2C%22type%22:%22point%22%2C%22id%22:%22078444d81c556f05a9cf15a



pe%22:%22point%22%2C%22id%22:%220c8649dc30fec4446ffad6c99fd09be049fb279%22%2C%22tagl  
ds%22:%22%5B%5D%7D%2C%7B%22point%22:%22%5B67786.1796875%2C45866.734375%2C1938%5D%2C%22  
type%22:%22point%22%2C%22id%22:%22269b12a2a08adbf85b8ea34f2df87a895292a4414%22%2C%22t  
aglds%22:%22%5B%5D%7D%2C%7B%22point%22:%22%5B65909.7421875%2C45643.98046875%2C2086%5D%2  
C%22type%22:%22point%22%2C%22id%22:%22294644cb821915b347a69a03a06d9576193b15369%22%  
2C%22taglids%22:%22%5B%5D%7D%2C%7B%22point%22:%22%5B62261.3046875%2C49048.79296875%2C1785  
.4383544921875%5D%2C%22type%22:%22point%22%2C%22id%22:%2212d15173391e4ebf26b7b961c7  
5acdea7a903645%22%2C%22taglids%22:%22%5B%5D%7D%2C%7B%22point%22:%22%5B62281.48046875%2C4  
9105.28515625%2C1788.4383544921875%5D%2C%22type%22:%22point%22%2C%22id%22:%222eee1  
b564dc4a392cd119b84d118e3c15f0216fa%22%2C%22taglids%22:%22%5B%5D%7D%2C%7B%22point%22:%22%  
5B62196.73828125%2C48830.8828125%2C1793.4383544921875%5D%2C%22type%22:%22point%22%  
2C%22id%22:%22a76ef8ad43fd8b5e209fe84e90b8e5c98bd63e44%22%2C%22taglids%22:%22%5B%5D%7D  
%2C%7B%22point%22:%22%5B62378.328125%2C48730%2C1864.4383544921875%5D%2C%22type%22:%22  
2point%22%2C%22id%22:%22287c8e1892dc8a9276d3779c57793d6227ac58d25%22%2C%22taglids%22:  
%22%5B%5D%7D%2C%7B%22point%22:%22%5B61700.02734375%2C48983.10546875%2C1588.033813476562  
5%5D%2C%22type%22:%22point%22%2C%22id%22:%22297071a1efb5e722011860aac50afebc5d3d8187  
a%22%2C%22taglids%22:%22%5B%5D%7D%2C%7B%22point%22:%22%5B61447.81640625%2C48958.4921875%  
2C1528.0338134765625%5D%2C%22type%22:%22point%22%2C%22id%22:%221170386edbf7777dcc2  
cf506536271bdb1812f8%22%2C%22taglids%22:%22%5B%5D%7D%2C%7B%22point%22:%22%5B61776.6992187  
5%2C48933.875%2C1450.0338134765625%5D%2C%22type%22:%22point%22%2C%22id%22:%22207c0f  
158f5a4d7fd9f8b334a7266fe7806cbd16e%22%2C%22taglids%22:%22%5B%5D%7D%2C%7B%22point%22:%22%  
5B62486.91796875%2C48502.09375%2C1273.0338134765625%5D%2C%22type%22:%22point%22%2C  
%22id%22:%22299a11b0d35225f7c8efd6bf5d3168261c88d04aa%22%2C%22taglids%22:%22%5B%5D%7D%2  
C%7B%22point%22:%22%5B62767.375%2C48312.02734375%2C1204.0338134765625%5D%2C%22type%22  
:%22point%22%2C%22id%22:%2220a2f9194170a3cfd0af14eacae19d75e07c28907%22%2C%22taglids%22  
:%22%5B%5D%7D%2C%7B%22point%22:%22%5B62763.33984375%2C48601.76953125%2C1020.033813476562  
5%5D%2C%22type%22:%22point%22%2C%22id%22:%2225a7b06741a80f41539c43d5445519d05edc4b9  
d3%22%2C%22taglids%22:%22%5B%5D%7D%2C%7B%22point%22:%22%5B62694.84375%2C48668.13671875%2  
C1001.0338134765625%5D%2C%22type%22:%22point%22%2C%22id%22:%222d7a44f753cb78db6f17b4  
c3b682aa98eb1afb587%22%2C%22taglids%22:%22%5B%5D%7D%2C%7B%22point%22:%22%5B61667.58984375  
%2C48948.02734375%2C1573.8988037109375%5D%2C%22type%22:%22point%22%2C%22id%22:%22ff  
e047c1244f004dcc6de41c5222cca3a0bc0628%22%2C%22taglids%22:%22%5B%5D%7D%2C%7B%22point%2  
2:%22%5B64647.89453125%2C46639.90625%2C2129.3173828125%5D%2C%22type%22:%22point%22%2C  
%22id%22:%22e47beaa78ad63ffefc99330538ecff927901c29a%22%2C%22taglids%22:%22%5B%5D%7D%2C  
%7B%22point%22:%22%5B64609.1171875%2C47539.48046875%2C2173%5D%2C%22type%22:%22point%2  
2%2C%22id%22:%2220e24e984be23419708e50a0879b5027e705ec2af%22%2C%22taglids%22:%22%5B%5D%  
7D%5D%2C%22annotationTags%22:%22%5B%5D%2C%22voxelSize%22:%22%5B4%2C4%2C40%5D%2C%22brack  
etShortcutsShowSegmentation%22:false%2C%22annotationSelectionShowsSegmentation%22:false%2C  
%22name%22:%22Percyete%20%22%7D%2C%7B%22tool%22:%22annotatePoint%22%2C%22selectedA  
nnotation%22:%22%7B%22id%22:%222def4fd977122fd01f9821ead2d75a5f0ea59bb1%22%7D%2C%22anno  
tationColor%22:%22#ff00d4%22%2C%22type%22:%22annotation%22%2C%22annotations%22:%22%5B%7B  
%22point%22:%22%5B93465%2C53449%2C647%5D%2C%22type%22:%22point%22%2C%22id%22:%2223330  
1f64f6fb4078fffb46775750ea965b2c7140%22%2C%22description%22:%22soma%20peg%22%2C%22tag  
lids%22:%22%5B%5D%7D%2C%7B%22point%22:%22%5B91918%2C51329%2C722%5D%2C%22type%22:%22poin



%2C%22id%22:%22fa5737f3e9a5b2a3ccc999c8cea86cbbde05511a%22%2C%22description%22:%22soma%20peg%22%2C%22tagIds%22:%5B%5D%7D%2C%7B%22point%22:%5B93466%2C53470%2C649%5D%2C%22type%22:%22point%22%2C%22id%22:%223b9811a91947f58b985796970fd94b754413f3a2%22%2C%22description%22:%22soma%20peg%22%2C%22tagIds%22:%5B%5D%7D%2C%7B%22point%22:%5B92905%2C53365%2C640%5D%2C%22type%22:%22point%22%2C%22id%22:%2246a3e190f7d85e520976cb23ff7450b159011bba%22%2C%22description%22:%22soma%20peg%22%2C%22tagIds%22:%5B%5D%7D%2C%7B%22point%22:%5B92518%2C52556%2C622%5D%2C%22type%22:%22point%22%2C%22id%22:%22fccd13bd9eeb93d1fcc0cc3ce1d54bdcbaa05583%22%2C%22description%22:%22distal%20peg%5Cn%22%2C%22tagIds%22:%5B%5D%2C%22parentId%22:%22f18060973ef039d941f949758ef5bdbad4eb3996%22%7D%2C%7B%22point%22:%5B93010%2C52402%2C832%5D%2C%22type%22:%22point%22%2C%22id%22:%226981f15580dad77770be9f1f11fdb3dc603cf13b%22%2C%22description%22:%22distal%20peg%22%2C%22tagIds%22:%5B%5D%2C%22parentId%22:%22f18060973ef039d941f949758ef5bdbad4eb3996%22%7D%2C%7B%22source%22:%5B93010%2C52402%2C832%5D%2C%22childrenVisible%22:false%2C%22type%22:%22collection%22%2C%22id%22:%22f18060973ef039d941f949758ef5bdbad4eb3996%22%2C%22description%22:%22distal%20peg%22%2C%22tagIds%22:%5B%5D%7D%2C%7B%22point%22:%5B93238%2C51790%2C811%5D%2C%22type%22:%22point%22%2C%22id%22:%22f64731e31363b15eb29387a5ab24911c9c354cb2%22%2C%22description%22:%22distal%20peg%22%2C%22tagIds%22:%5B%5D%7D%2C%7B%22point%22:%5B93161%2C52153%2C815%5D%2C%22type%22:%22point%22%2C%22id%22:%22924e9fb84ce76cdd9c9bef1f1dfb2bf4a076d607%22%2C%22description%22:%22distal%20peg%22%2C%22tagIds%22:%5B%5D%7D%2C%7B%22point%22:%5B91464%2C50010%2C892%5D%2C%22type%22:%22point%22%2C%22id%22:%226432f5732807d90a41e01c44912dcda54d6ffa91%22%2C%22description%22:%22distal%20peg%22%2C%22tagIds%22:%5B%5D%7D%2C%7B%22point%22:%5B91680%2C50937%2C806%5D%2C%22type%22:%22point%22%2C%22id%22:%221abf85dd2778c20c6f04e274849c82cf04f0cb2f%22%2C%22tagIds%22:%5B%5D%7D%2C%7B%22point%22:%5B91801%2C52150%2C827%5D%2C%22type%22:%22point%22%2C%22id%22:%22cadc70e90e23cef0db1f4bbe3ee193182a7256d%22%2C%22description%22:%22distal%20peg%22%2C%22tagIds%22:%5B%5D%7D%2C%7B%22point%22:%5B90948%2C48164%2C752%5D%2C%22type%22:%22point%22%2C%22id%22:%22f93c8ea2a5b12bbebe7aed6dacb6f65e01efe9bd%22%2C%22description%22:%22distal%20peg%22%2C%22tagIds%22:%5B%5D%7D%2C%7B%22point%22:%5B90891%2C47560%2C725%5D%2C%22type%22:%22point%22%2C%22id%22:%220ca580a91212d48f39debadf31dc4eaf044e73fc%22%2C%22description%22:%22distal%20peg%22%2C%22tagIds%22:%5B%5D%7D%2C%7B%22point%22:%5B91740%2C49122%2C727%5D%2C%22type%22:%22point%22%2C%22id%22:%221c7280faa40170547dd2b07ddea46a34a708dbd6%22%2C%22description%22:%22distal%20peg%22%2C%22tagIds%22:%5B%5D%7D%2C%7B%22point%22:%5B91626%2C53943%2C818%5D%2C%22type%22:%22point%22%2C%22id%22:%221bc3348116cb577b533dde80266987b5545156b5%22%2C%22description%22:%22distal%20peg%5Cn%22%2C%22tagIds%22:%5B%5D%7D%2C%7B%22point%22:%5B93332.4296875%2C54704.6796875%2C436.1690368652344%5D%2C%22type%22:%22point%22%2C%22id%22:%22c6b604513ed9040c090b1350326875d7aeb2da5b%22%2C%22tagIds%22:%5B%5D%7D%2C%7B%22point%22:%5B93982.3203125%2C54261.7421875%2C542.1690673828125%5D%2C%22type%22:%22point%22%2C%22id%22:%22d6f7710085a41fabd83411fc808b77e48c43c577%22%2C%22tagIds%22:%5B%5D%7D%2C%7B%22point%22:%5B93571.5546875%2C53182.35546875%2C648.1690673828125%5D%2C%22type%22:%22point%22%2C%22id%22:%22140e93c8ca98fa8bc0b8cefd03be05f26324c287%22%2C%22tagIds%22:%5B%5D%7D%2C%7B%22point%22:%5B93330.3046875%2C55141.453125%2C357.1690368652344%5D%2C%22type%22:%22point%22%2C%22id%22:%2273b2fde957d9b54169093a60a87b224e5a9d6d16%22%2C%22tagIds%22:%5

B%5D%7D%2C%7B%22point%22:%5B94132.28125%2C55047.765625%2C312.22796630859375%5D%2C%22type%22:%22point%22%2C%22id%22:%221c68630d57fbdd1d4b2dbed073f8ed9ce0870bbd%22%2C%22tagIds%22:%5B%5D%7D%2C%7B%22point%22:%5B93474.9921875%2C52111.5078125%2C762.2279663085938%5D%2C%22type%22:%22point%22%2C%22id%22:%22d42830bfb5a2891277fe011688e7552aea8f5676%22%2C%22tagIds%22:%5B%5D%7D%2C%7B%22point%22:%5B92165.6328125%2C46201.51953125%2C820.3224487304688%5D%2C%22type%22:%22point%22%2C%22id%22:%22cc42e43a4730e5a3d652002ae6aa0ba251e7c261%22%2C%22tagIds%22:%5B%5D%7D%5D%2C%22annotationTags%22:%5B%5D%2C%22voxelSize%22:%5B4%2C4%2C40%5D%2C%22bracketShortcutsShowSegmentation%22:false%2C%22annotationSelectionShowsSegmentation%22:false%2C%22name%22:%22Pericyte%203%22%7D%2C%7B%22tool%22:%22annotatePoint%22%2C%22annotationColor%22:%22#00fa32%22%2C%22type%22:%22annotation%22%2C%22annotations%22:%5B%7B%22point%22:%5B74970%2C70935%2C698%5D%2C%22type%22:%22point%22%2C%22id%22:%22b8e1147dc9e8f741e46ee55e85217fd22ea14efd%22%2C%22description%22:%22soma%20peg%22%2C%22tagIds%22:%5B%5D%7D%2C%7B%22point%22:%5B74676%2C70576%2C702%5D%2C%22type%22:%22point%22%2C%22id%22:%22f4dcfd576bdd5b54ebfe88596924d346957d46b2%22%2C%22description%22:%22soma%20peg%22%2C%22tagIds%22:%5B%5D%7D%2C%7B%22point%22:%5B75672%2C71084%2C713%5D%2C%22type%22:%22point%22%2C%22id%22:%22ef0fdc3b9229515f04848ecd1e5e55cd3cca0e7a%22%2C%22description%22:%22soma%20peg%22%2C%22tagIds%22:%5B%5D%7D%2C%7B%22point%22:%5B75601%2C70922%2C689%5D%2C%22type%22:%22point%22%2C%22id%22:%228962c5a892d5301b40fb1d9f68c052c67a453a38%22%2C%22description%22:%22soma%20peg%22%2C%22tagIds%22:%5B%5D%7D%2C%7B%22point%22:%5B76762%2C74663%2C711%5D%2C%22type%22:%22point%22%2C%22id%22:%22c4caa639f4c5fa3bbe3c02c69750c339c1812c5d%22%2C%22description%22:%22soma%20peg%22%2C%22tagIds%22:%5B%5D%7D%2C%7B%22point%22:%5B74211%2C72775%2C727%5D%2C%22type%22:%22point%22%2C%22id%22:%22172fe7d82a42a66b6e1489031d9d2ea0b0c2238a%22%2C%22description%22:%22soma%20peg%22%2C%22tagIds%22:%5B%5D%7D%2C%7B%22point%22:%5B75837%2C73884%2C739%5D%2C%22type%22:%22point%22%2C%22id%22:%22175410c5228cc861295d3213ad22b2fcd7b21bc8%22%2C%22description%22:%221n%22%2C%22tagIds%22:%5B%5D%7D%2C%7B%22point%22:%5B77374%2C75366%2C703%5D%2C%22type%22:%22point%22%2C%22id%22:%2243595006e1e21847898bff76f1b8c0c1679319ce%22%2C%22description%22:%221n%22%2C%22tagIds%22:%5B%5D%7D%2C%7B%22point%22:%5B77360%2C75663%2C737%5D%2C%22type%22:%22point%22%2C%22id%22:%22ac35d886aa6f1e43d5a97527082a4f4293927819%22%2C%22description%22:%221n%22%2C%22tagIds%22:%5B%5D%7D%2C%7B%22point%22:%5B74755%2C73059%2C679%5D%2C%22type%22:%22point%22%2C%22id%22:%22f65108e5607774b94157af890f73641de3c2248a%22%2C%22description%22:%22soma%20peg%22%2C%22tagIds%22:%5B%5D%7D%2C%7B%22point%22:%5B76423%2C74522%2C710%5D%2C%22type%22:%22point%22%2C%22id%22:%22a3b744d9c920b919c7c45b7382f037f256cca267%22%2C%22description%22:%22soma%20peg%22%2C%22tagIds%22:%5B%5D%7D%2C%7B%22point%22:%5B75907%2C73314%2C649%5D%2C%22type%22:%22point%22%2C%22id%22:%22b6689a03910ffe1cf7b9ba172fb38c2bd099e80%22%2C%22description%22:%221n%22%2C%22tagIds%22:%5B%5D%7D%2C%7B%22point%22:%5B77389%2C74542%2C647%5D%2C%22type%22:%22point%22%2C%22id%22:%229a569fa507fa0c337eec1a418270bcd142cadb3c%22%2C%22description%22:%221n%20%28touching%20nucleus%29%22%2C%22tagIds%22:%5B%5D%7D%2C%7B%22point%22:%5B77532%2C75880%2C725%5D%2C%22type%22:%22point%22%2C%22id%22:%22355818c44c0b221a651a31ec9a417945ac067233%22%2C%22description%22:%221n%22%2C%22tagIds%22:%5B%5D%7D%2C%7B%22point%22:%5B77058%2C75442%2C757%5D%2C%22type%22:%22point%22%2C%22id%22:%2219a7d1e8c3ee10a0e9bacc84aebbcabfe22aac

b%22%2C%22description%22:%221n%22%2C%22tagIds%22:%5B%5D%7D%2C%7B%22point%22:%5B77405%2C74762%2C664%5D%2C%22type%22:%22point%22%2C%22id%22:%22bc3b5cd3920051d69da4ab7bd31ec1a662cab131%22%2C%22description%22:%221n%22%2C%22tagIds%22:%5B%5D%7D%2C%7B%22point%22:%5B75776%2C73314%2C661%5D%2C%22type%22:%22point%22%2C%22id%22:%22bcd8a903cb4b2e144e694e97e1bc5dd8a9b96f37%22%2C%22description%22:%22soma%20peg%22%2C%22tagIds%22:%5B%5D%7D%2C%7B%22point%22:%5B74797%2C70008%2C677%5D%2C%22type%22:%22point%22%2C%22id%22:%226000cfb8440c8698591ca7bd612ab68affc90e4f%22%2C%22description%22:%221n%5Cn%22%2C%22tagIds%22:%5B%5D%7D%2C%7B%22point%22:%5B74930%2C69652%2C663%5D%2C%22type%22:%22point%22%2C%22id%22:%223bf7e4be870bc960eeb4e8f00c0fba7bd9689b46%22%2C%22description%22:%22distal%20peg%22%2C%22tagIds%22:%5B%5D%7D%2C%7B%22point%22:%5B75623%2C70304%2C653%5D%2C%22type%22:%22point%22%2C%22id%22:%22149b0586998c558af90b5d138dcc1e0e14f2b4ec%22%2C%22description%22:%22distal%20peg%22%2C%22tagIds%22:%5B%5D%7D%2C%7B%22point%22:%5B75281%2C69004%2C650%5D%2C%22type%22:%22point%22%2C%22id%22:%22cd2c1f72253164b4275ca5859bf216317b250acf%22%2C%22description%22:%221n%5Cn%22%2C%22tagIds%22:%5B%5D%7D%2C%7B%22point%22:%5B75392%2C69552%2C627%5D%2C%22type%22:%22point%22%2C%22id%22:%221bfa16d66d3b5146788539a9326b8fbbf17407db%22%2C%22description%22:%221n%22%2C%22tagIds%22:%5B%5D%7D%2C%7B%22point%22:%5B75367%2C69013%2C639%5D%2C%22type%22:%22point%22%2C%22id%22:%22fa35572c2be2a6a201c41cb17acff8d6251bd5f7%22%2C%22description%22:%221n%22%2C%22tagIds%22:%5B%5D%7D%2C%7B%22point%22:%5B76602%2C65796%2C598%5D%2C%22type%22:%22point%22%2C%22id%22:%22121d32893383d398f6be9d3c238d23390bbac4d9%22%2C%22description%22:%221n%5Cn%22%2C%22tagIds%22:%5B%5D%7D%2C%7B%22point%22:%5B76567%2C65875%2C577%5D%2C%22type%22:%22point%22%2C%22id%22:%22447a3ea06c0cee5b67d55e97ace1222db7d6e99%22%2C%22description%22:%223n%5Cn%22%2C%22tagIds%22:%5B%5D%7D%2C%7B%22point%22:%5B79375%2C64498%2C627%5D%2C%22type%22:%22point%22%2C%22id%22:%22f2c3c78e6fa074dc6c1dc9b509789663d05b834c%22%2C%22description%22:%223n%22%2C%22tagIds%22:%5B%5D%7D%2C%7B%22point%22:%5B76643%2C67900%2C558%5D%2C%22type%22:%22point%22%2C%22id%22:%2287dacc1a0374d4dfe81c195d1edb068f5b58341d%22%2C%22description%22:%221n%5Cn%22%2C%22tagIds%22:%5B%5D%7D%2C%7B%22point%22:%5B76573%2C66895%2C561%5D%2C%22type%22:%22point%22%2C%22id%22:%22523bc4697a195e505911ad47b7a9f743f01eac9c%22%2C%22description%22:%221n%5Cn%22%2C%22tagIds%22:%5B%5D%7D%2C%7B%22point%22:%5B76567%2C65805%2C585%5D%2C%22type%22:%22point%22%2C%22id%22:%22e5f1062b4d7a96f02f3db7ac8e3554117a8b21b9%22%2C%22description%22:%223n%22%2C%22tagIds%22:%5B%5D%7D%2C%7B%22point%22:%5B77598%2C64964%2C616%5D%2C%22type%22:%22point%22%2C%22id%22:%224f03cceacdd25d3780cda5b3fb8527cadaafa002%22%2C%22description%22:%223n%22%2C%22tagIds%22:%5B%5D%7D%2C%7B%22point%22:%5B78816%2C64008%2C656%5D%2C%22type%22:%22point%22%2C%22id%22:%22bd7caaedebdb6693a0fb5c7f6baa011af25762%22%2C%22description%22:%223n%22%2C%22tagIds%22:%5B%5D%7D%2C%7B%22point%22:%5B75469%2C73200%2C669%5D%2C%22type%22:%22point%22%2C%22id%22:%227818acdd59a1a0123a4ff08db1c7b39bb878bd00%22%2C%22description%22:%22soma%20peg%22%2C%22tagIds%22:%5B%5D%7D%2C%7B%22point%22:%5B74105%2C71634%2C754%5D%2C%22type%22:%22point%22%2C%22id%22:%22152cf7127b4f303f068c5b1aeb91abc4abd485fb%22%2C%22description%22:%22soma%20peg%22%2C%22tagIds%22:%5B%5D%7D%2C%7B%22point%22:%5B75184%2C72749%2C713%5D%2C%22type%22:%22point%22%2C%22id%22:%22837331b8227e96921f52f5189027775efb9e809d%22%2C%22description%22:%22soma%20peg%22%2C%22tagIds%22:%5B%5D%7D%2C%7B%22point%22:%5B74380%2C72879%2C7

11%5D%2C%22type%22:%22point%22%2C%22id%22:%223f8c3aba4500def4469724b797bf1ec02b4235  
c4%22%2C%22description%22:%22soma%20peg%22%2C%22tagIds%22:%5B%5D%7D%2C%7B%22point  
%22:%5B74200%2C73079%2C731%5D%2C%22type%22:%22point%22%2C%22id%22:%222137cb0b616  
d4dd69fe7429ab34f46f140f60221%22%2C%22description%22:%22soma%20peg%22%2C%22tagIds%22:  
%5B%5D%7D%2C%7B%22point%22:%5B77343%2C74798%2C681%5D%2C%22type%22:%22point%22%  
2C%22id%22:%229f1d5bdec109af8a4d0f3912523b27e2bc05faa%22%2C%22description%22:%221n%2  
2%2C%22tagIds%22:%5B%5D%7D%2C%7B%22point%22:%5B77413%2C74979%2C684%5D%2C%22type  
%22:%22point%22%2C%22id%22:%221c11d45bb5b6a03ba850af606c4f81abd1453973%22%2C%22desc  
ription%22:%221n%22%2C%22tagIds%22:%5B%5D%7D%2C%7B%22point%22:%5B77346%2C75120%2C  
697%5D%2C%22type%22:%22point%22%2C%22id%22:%223a6470e91758429fd84d8a745a1b90cebb52  
c6dd%22%2C%22description%22:%221n%22%2C%22tagIds%22:%5B%5D%7D%2C%7B%22point%22:%5  
B89540%2C66678%2C52%5D%2C%22type%22:%22point%22%2C%22id%22:%2204466291f1d4c26d4e5  
aa6bff2f8ed7485c806f7%22%2C%22description%22:%223n%22%2C%22tagIds%22:%5B%5D%7D%2C%7  
B%22point%22:%5B88720%2C67286%2C58%5D%2C%22type%22:%22point%22%2C%22id%22:%22a45e  
e8a03712ab05533d2b7d72d6ad5a29ea8bf2%22%2C%22description%22:%223n%22%2C%22tagIds%22:  
%5B%5D%7D%2C%7B%22point%22:%5B77400%2C74513%2C623%5D%2C%22type%22:%22point%22%  
2C%22id%22:%22c4e035ac35d3b1592d7e91590eb26f497ad7d60d%22%2C%22description%22:%221n%  
22%2C%22tagIds%22:%5B%5D%7D%2C%7B%22point%22:%5B76799%2C66327%2C629%5D%2C%22typ  
e%22:%22point%22%2C%22id%22:%22b3a4a10e48e85dd2324815cdb20bcbb792f6193c%22%2C%22tag  
Ids%22:%5B%5D%7D%2C%7B%22point%22:%5B76430%2C67216%2C615%5D%2C%22type%22:%22poin  
t%22%2C%22id%22:%22c58cebae5d956bf53b8c37e822a112674b40421a%22%2C%22tagIds%22:%5B%5  
D%7D%2C%7B%22point%22:%5B76429%2C67141%2C605%5D%2C%22type%22:%22point%22%2C%22i  
d%22:%22b23976660d9516904a3476d6b4150140c316f8bc%22%2C%22tagIds%22:%5B%5D%7D%2C%7  
B%22point%22:%5B74597.0078125%2C70843.171875%2C727.9506225585938%5D%2C%22type%22:%  
22point%22%2C%22id%22:%228b17bd76697dd54efa9b9d137d688f32ad42476c%22%2C%22tagIds%22:  
%5B%5D%7D%2C%7B%22point%22:%5B75598%2C71191.6171875%2C728.9506225585938%5D%2C%2  
2type%22:%22point%22%2C%22id%22:%22b073f404e0b54a549e3cce6bcd7fe180bd49ddfd%22%2C%2  
2tagIds%22:%5B%5D%7D%2C%7B%22point%22:%5B75468.890625%2C73420.59375%2C775.950622558  
5938%5D%2C%22type%22:%22point%22%2C%22id%22:%22e3edbdfd06d0e807dbc6180aa311c25a72f1  
c054%22%2C%22tagIds%22:%5B%5D%7D%2C%7B%22point%22:%5B77315.4765625%2C75110.632812  
5%2C703%5D%2C%22type%22:%22point%22%2C%22id%22:%2206a8cea512bf7c15b032b7f85b8e0b83  
84284536%22%2C%22tagIds%22:%5B%5D%7D%2C%7B%22point%22:%5B76596.046875%2C67567.726  
5625%2C559%5D%2C%22type%22:%22point%22%2C%22id%22:%227fafaef7b6dbde7a1abea70c24bf21  
c448a7ed12%22%2C%22tagIds%22:%5B%5D%7D%2C%7B%22point%22:%5B77974.125%2C63808.9960  
9375%2C722%5D%2C%22type%22:%22point%22%2C%22id%22:%2242969579bcbf330b8b0fc32f2ef9ae  
7481333a74%22%2C%22tagIds%22:%5B%5D%7D%2C%7B%22point%22:%5B76036.046875%2C68544.1  
796875%2C598%5D%2C%22type%22:%22point%22%2C%22id%22:%2289912a7ef2bb06476e536699f62  
fa134b514d5a1%22%2C%22tagIds%22:%5B%5D%7D%5D%2C%22annotationTags%22:%5B%5D%2C%22  
voxelSize%22:%5B4%2C4%2C40%5D%2C%22bracketShortcutsShowSegmentation%22:false%2C%22ann  
otationSelectionShowsSegmentation%22:false%2C%22name%22:%22Percycte%204%22%7D%2C%7B%2  
2tool%22:%22annotatePoint%22%2C%22selectedAnnotation%22:%7B%22id%22:%22b4c5f178b1c8af9a  
1a5df6412a66a2516c9522d7%22%7D%2C%22annotationColor%22:%22#fa8500%22%2C%22type%22:%  
22annotation%22%2C%22annotations%22:%5B%7B%22point%22:%5B92536%2C51506%2C1964%5D%2  
C%22type%22:%22point%22%2C%22id%22:%223a2f81c4fc2d25fa146b5518476ac7470ec77560%22%2C

%22description%22:%22soma%20peg%5Cn%22%2C%22tagIds%22:%5B%5D%7D%2C%7B%22point%22:  
%5B92416%2C51293%2C1936%5D%2C%22type%22:%22point%22%2C%22id%22:%2294a5f0428a2ef73  
513b6db9bd7f531dd4ba66be2%22%2C%22description%22:%22soma%20peg%5Cn%22%2C%22tagIds%  
22:%5B%5D%7D%2C%7B%22point%22:%5B92786%2C51541%2C1944%5D%2C%22type%22:%22point%  
22%2C%22id%22:%22076a3ae9c38166ae4aa1013d50a644e995d534d7%22%2C%22description%22:%22  
soma%20peg%5Cn%22%2C%22tagIds%22:%5B%5D%7D%2C%7B%22point%22:%5B93065%2C52130%2C  
1901%5D%2C%22type%22:%22point%22%2C%22id%22:%22e23e38a1b9faaced48c8831d54d8b8f438ffa  
3cf%22%2C%22description%22:%22soma%20peg%5Cn%22%2C%22tagIds%22:%5B%5D%7D%2C%7B%2  
2point%22:%5B93142%2C51950%2C1899%5D%2C%22type%22:%22point%22%2C%22id%22:%2206e28  
189ca6ec963201d3272d347ade9dbbed28c%22%2C%22description%22:%22soma%20peg%5Cn%22%2C  
%22tagIds%22:%5B%5D%7D%2C%7B%22point%22:%5B92609%2C52372%2C1869%5D%2C%22type%22:  
%22point%22%2C%22id%22:%2291e2a7b2fef50c858b1f57b4dd39af039f6773f2%22%2C%22description  
%22:%22soma%20peg%5Cn%22%2C%22tagIds%22:%5B%5D%7D%2C%7B%22point%22:%5B92594%2C5  
2336%2C1866%5D%2C%22type%22:%22point%22%2C%22id%22:%2288b55a9e00d1d44fc23e167d5a27  
e97873b1da7d%22%2C%22description%22:%22soma%20peg%5Cn%22%2C%22tagIds%22:%5B%5D%7D  
%2C%7B%22point%22:%5B92194%2C52365%2C1878%5D%2C%22type%22:%22point%22%2C%22id%22  
:%22677250eefb5141fe6ffb4836b65e98ee53907b26%22%2C%22description%22:%22soma%20peg%5C  
n%22%2C%22tagIds%22:%5B%5D%7D%2C%7B%22point%22:%5B93091%2C51826%2C1921%5D%2C%2  
2type%22:%22point%22%2C%22id%22:%229dfa5b6b569308eb1e3f61d13840db25f828cd9a%22%2C%2  
2description%22:%22soma%20peg%5Cn%22%2C%22tagIds%22:%5B%5D%7D%2C%7B%22point%22:%5  
B92717%2C50379%2C1880%5D%2C%22type%22:%22point%22%2C%22id%22:%22ae4196fa260f43b108  
d32feefb2df555f76b32ac%22%2C%22description%22:%22soma%20peg%5Cn%22%2C%22tagIds%22:%5  
B%5D%7D%2C%7B%22point%22:%5B92359%2C51496%2C1961%5D%2C%22type%22:%22point%22%2C  
%22id%22:%22565e5da070da0b552c30e95075652e1041ee96c6%22%2C%22description%22:%22soma  
%20peg%5Cn%22%2C%22tagIds%22:%5B%5D%7D%2C%7B%22point%22:%5B93439%2C49652%2C1925  
%5D%2C%22type%22:%22point%22%2C%22id%22:%22f9f6845d20b734a4f39fc46221f4a10d1b3506e3  
%22%2C%22description%22:%22soma%20peg%5Cn%22%2C%22tagIds%22:%5B%5D%7D%2C%7B%22p  
oint%22:%5B93432%2C49675%2C1921%5D%2C%22type%22:%22point%22%2C%22id%22:%22065b28e  
940c21c05c5cdc4374369e8e28938f313%22%2C%22description%22:%22soma%20peg%5Cn%22%2C%22  
tagIds%22:%5B%5D%7D%2C%7B%22point%22:%5B93016%2C49361%2C1958%5D%2C%22type%22:%22  
point%22%2C%22id%22:%22feb4720cd38c29044c9740e5f6f45bca8da53d9d%22%2C%22description%2  
2:%22soma%20peg%5Cn%22%2C%22tagIds%22:%5B%5D%7D%2C%7B%22point%22:%5B93012%2C501  
05%2C1917%5D%2C%22type%22:%22point%22%2C%22id%22:%22ceb5ad135560d7da19c3544b812c4e  
7941b143e1%22%2C%22description%22:%22soma%20peg%5Cn%22%2C%22tagIds%22:%5B%5D%7D%  
2C%7B%22point%22:%5B92336%2C49115%2C1983%5D%2C%22type%22:%22point%22%2C%22id%22:  
%22c10abf052386a8982f076c40adee61054bda721b%22%2C%22description%22:%22distal%20peg%22  
%2C%22tagIds%22:%5B%5D%7D%2C%7B%22point%22:%5B92891%2C49514%2C1959%5D%2C%22type  
%22:%22point%22%2C%22id%22:%2288e4b8d9e767edbc880530502260962fcad50437%22%2C%22tagl  
ds%22:%5B%5D%7D%2C%7B%22point%22:%5B91056%2C48942%2C1973%5D%2C%22type%22:%22poi  
nt%22%2C%22id%22:%22d685b46ae78da12e48be28a4bb86e313ede2eeb2%22%2C%22tagIds%22:%5B  
%5D%7D%2C%7B%22point%22:%5B91746%2C48726%2C1998%5D%2C%22type%22:%22point%22%2C  
%22id%22:%228753722a552ef92c999214028c6f0717c88cc104%22%2C%22tagIds%22:%5B%5D%7D%2C  
%7B%22point%22:%5B90126%2C48726%2C1950%5D%2C%22type%22:%22point%22%2C%22id%22:%2  
26d32559c87a5d7eb9453e34c823a75f2ecebb888%22%2C%22tagIds%22:%5B%5D%7D%2C%7B%22poin

t%22:%5B92988%2C56223%2C2034%5D%2C%22type%22:%22point%22%2C%22id%22:%22477dd0b9335d000230840f51685c77f86ae03d2c%22%2C%22description%22:%22distal%20peg%22%2C%22tagIds%22:%5B%5D%7D%2C%7B%22point%22:%5B93270%2C56942%2C2032%5D%2C%22type%22:%22point%22%2C%22id%22:%229d907f72fe69d37b7a7cf0c05df0b3b5634eb1d2%22%2C%22tagIds%22:%5B%5D%7D%2C%7B%22point%22:%5B93952%2C57139%2C2001%5D%2C%22type%22:%22point%22%2C%22id%22:%2234559719a3055eb521248f718eacaf8b024ef012%22%2C%22tagIds%22:%5B%5D%7D%2C%7B%22point%22:%5B94259%2C58093%2C1992%5D%2C%22type%22:%22point%22%2C%22id%22:%2207cf39c61c1ce470a5a629a649c6c733e39d7ba0%22%2C%22tagIds%22:%5B%5D%7D%2C%7B%22point%22:%5B94046%2C57735%2C1996%5D%2C%22type%22:%22point%22%2C%22id%22:%221dd6dee193ad7b5404842bd2fa20ec4a99ca715b%22%2C%22tagIds%22:%5B%5D%7D%2C%7B%22point%22:%5B93971%2C57610%2C1996%5D%2C%22type%22:%22point%22%2C%22id%22:%22a88ed75ec3e6f903775f961f0721559a18e00571%22%2C%22tagIds%22:%5B%5D%7D%2C%7B%22point%22:%5B92342%2C54592%2C2032%5D%2C%22type%22:%22point%22%2C%22id%22:%222bbfd9282952a6853dbe011d2ef7a36591be70e8%22%2C%22tagIds%22:%5B%5D%7D%2C%7B%22point%22:%5B92913%2C53712%2C1995%5D%2C%22type%22:%22point%22%2C%22id%22:%2226ee10de57cbe45e2bcac612608d3318cfae0ff4%22%2C%22tagIds%22:%5B%5D%7D%2C%7B%22point%22:%5B94290%2C50706%2C1797%5D%2C%22type%22:%22point%22%2C%22id%22:%2215a1caeebd0a820eebff8d05af40d4e084869f22%22%2C%22tagIds%22:%5B%5D%7D%2C%7B%22point%22:%5B93481.9140625%2C49975.625%2C1904.09765625%5D%2C%22type%22:%22point%22%2C%22id%22:%22153ff1daad2ca10d752248b1f27c433f239277d6%22%2C%22description%22:%22soma%20peg%22%2C%22tagIds%22:%5B%5D%7D%2C%7B%22point%22:%5B93414.9609375%2C49652.59375%2C1928.09765625%5D%2C%22type%22:%22point%22%2C%22id%22:%2226afa2af9b5aa670cd1b93e9cce08ca57edf3f1ba%22%2C%22description%22:%22soma%20peg%22%2C%22tagIds%22:%5B%5D%7D%2C%7B%22point%22:%5B85797.5390625%2C56193.83984375%2C1965.7330322265625%5D%2C%22type%22:%22point%22%2C%22id%22:%223aba7bf861cf783c7f31ae8890dad50786ce2f21%22%2C%22description%22:%22distal%20peg%22%2C%22tagIds%22:%5B%5D%7D%2C%7B%22point%22:%5B89376.953125%2C62562.88671875%2C2126.688232421875%5D%2C%22type%22:%22point%22%2C%22id%22:%2229dfce94274a326076bd3808805a80ddf5a37dc4%22%2C%22tagIds%22:%5B%5D%7D%2C%7B%22point%22:%5B94677.0078125%2C58415.6640625%2C1971.4781494140625%5D%2C%22type%22:%22point%22%2C%22id%22:%222881b5a65fa59e21276b8e916925ee6e3f466db4%22%2C%22tagIds%22:%5B%5D%7D%2C%7B%22point%22:%5B102255.046875%2C63856.98828125%2C1572.2752685546875%5D%2C%22type%22:%22point%22%2C%22id%22:%224d70f48e3bc6f8a6f5303bfd6ad9833ea7b07981%22%2C%22tagIds%22:%5B%5D%7D%2C%7B%22point%22:%5B104299.59375%2C65644.2578125%2C1423.9691162109375%5D%2C%22type%22:%22point%22%2C%22id%22:%22265ed08ea0e6d9d997e698057e4f97c6ce6d1da0d%22%2C%22tagIds%22:%5B%5D%7D%2C%7B%22point%22:%5B115760.9375%2C73434.125%2C1877.885009765625%5D%2C%22type%22:%22point%22%2C%22id%22:%22bdf5897de1ca795e3cdae1e3279366260a377ca%22%2C%22tagIds%22:%5B%5D%7D%2C%7B%22point%22:%5B97816.5546875%2C60758.95703125%2C1858.51171875%5D%2C%22type%22:%22point%22%2C%22id%22:%22baaf46b4f2761c54e67d1d16871bd7f4d4ff7633%22%2C%22tagIds%22:%5B%5D%7D%2C%7B%22point%22:%5B97707.34375%2C61266.6015625%2C1856.51171875%5D%2C%22type%22:%22point%22%2C%22id%22:%22039c1dff6e8676f79b477ad955c92f9f7c59ab61%22%2C%22tagIds%22:%5B%5D%7D%2C%7B%22point%22:%5B97975.515625%2C61682.8984375%2C1844.51171875%5D%2C%22type%22:%22point%22%2C%22id%22:%220de41a1f910485b242999b76b962e90cdcc4b24f%22%2C%22tagIds%22:%5B%5D%7D%2C%7B%22point%22:%5B95005.9375%2C58733.84765625%2C1962.617431640625%5D%2C%22type%22:%22point%22%2C%22id%22:%22e78b0bde27c8b517898090e2dacdf4

7659c5960c%22%2C%22tagIds%22:%5B%5D%7D%2C%7B%22point%22:%5B94291.4296875%2C51328.21875%2C1524.3525390625%5D%2C%22type%22:%22point%22%2C%22id%22:%22d5d42823490a46c69f543672221cc8bd7c023350%22%2C%22tagIds%22:%5B%5D%7D%2C%7B%22point%22:%5B94219.75%2C51448.43359375%2C1470.3525390625%5D%2C%22type%22:%22point%22%2C%22id%22:%22d38003824a7fa4e6967b4f8b2f2c7226eb6cdcc%22%2C%22tagIds%22:%5B%5D%7D%2C%7B%22point%22:%5B94305.3203125%2C51245.765625%2C1582.3525390625%5D%2C%22type%22:%22point%22%2C%22id%22:%22b4c5f178b1c8af9a1a5df6412a66a2516c9522d7%22%2C%22tagIds%22:%5B%5D%7D%2C%7B%22point%22:%5B94318.890625%2C50636.6796875%2C1440.3525390625%5D%2C%22type%22:%22point%22%2C%22id%22:%2237b6d3eeb619679d876a34786cad648f5651c4bf%22%2C%22tagIds%22:%5B%5D%7D%5D%2C%22annotationTags%22:%5B%5D%2C%22voxelSize%22:%5B4%2C4%2C40%5D%2C%22bracketShortcutsShowSegmentation%22:false%2C%22annotationSelectionShowsSegmentation%22:false%2C%22name%22:%22Pericyte%205%22%7D%2C%7B%22annotationColor%22:%22#0449ec%22%2C%22type%22:%22annotation%22%2C%22annotations%22:%5B%7B%22point%22:%5B76381%2C73768%2C1590%5D%2C%22type%22:%22point%22%2C%22id%22:%22bbf7109e5d50e252fddd29c084a44c348020c6ee%22%2C%22description%22:%22e\_nucleus%22%2C%22tagIds%22:%5B%5D%7D%2C%7B%22point%22:%5B74991%2C59251%2C1643%5D%2C%22type%22:%22point%22%2C%22id%22:%227bbaab9294415d7bad625421569038faa6d1c39c%22%2C%22tagIds%22:%5B%5D%7D%2C%7B%22point%22:%5B71207%2C44930%2C1436%5D%2C%22type%22:%22point%22%2C%22id%22:%22279a997fe01d0629e01682c777079f531d902d0d%22%2C%22tagIds%22:%5B%5D%7D%2C%7B%22point%22:%5B71289%2C44920%2C1515%5D%2C%22type%22:%22point%22%2C%22id%22:%22cb52874afa5a6015826dd46c4f999abd428c073a%22%2C%22tagIds%22:%5B%5D%7D%2C%7B%22point%22:%5B72371%2C39422%2C1766%5D%2C%22type%22:%22point%22%2C%22id%22:%22c912d9c8882d2eb3840351a432dfa07e08a9b9d7%22%2C%22tagIds%22:%5B%5D%7D%2C%7B%22point%22:%5B100175%2C62892%2C1816%5D%2C%22type%22:%22point%22%2C%22id%22:%22ad2ead124045a29d145cf3b24a07903648851753%22%2C%22tagIds%22:%5B%5D%7D%2C%7B%22point%22:%5B115576%2C74286%2C1830%5D%2C%22type%22:%22point%22%2C%22id%22:%22e8d20e17fa38d86150b548dd085de3189d44fa19%22%2C%22tagIds%22:%5B%5D%7D%2C%7B%22point%22:%5B93680%2C50382%2C820%5D%2C%22type%22:%22point%22%2C%22id%22:%225c038d7f4b1cae5770b59a79a61d619fe2b7a69d%22%2C%22tagIds%22:%5B%5D%7D%2C%7B%22point%22:%5B91538%2C53160%2C820%5D%2C%22type%22:%22point%22%2C%22id%22:%22b36c07317fb471e9a46f9f0f8183f3bd5c1cddba%22%2C%22tagIds%22:%5B%5D%7D%2C%7B%22point%22:%5B97872%2C69646%2C953%5D%2C%22type%22:%22point%22%2C%22id%22:%224f686b79c26095c8d06b9375ddf8eb1b5350696f%22%2C%22tagIds%22:%5B%5D%7D%2C%7B%22point%22:%5B85598%2C66725%2C373%5D%2C%22type%22:%22point%22%2C%22id%22:%22508cdbcb5835f4525f33cf92619832a4f254b92d%22%2C%22tagIds%22:%5B%5D%7D%2C%7B%22point%22:%5B100387%2C75905%2C1098%5D%2C%22type%22:%22point%22%2C%22id%22:%22575bf802cc38eae03f3e02568194b01a946653c0%22%2C%22tagIds%22:%5B%5D%7D%2C%7B%22point%22:%5B52744%2C58982%2C636%5D%2C%22type%22:%22point%22%2C%22id%22:%225eabc81fada461ed6c0956e639472586f0fb51e3%22%2C%22tagIds%22:%5B%5D%7D%2C%7B%22point%22:%5B71197%2C46186%2C1767%5D%2C%22type%22:%22point%22%2C%22id%22:%2228f244c312740a72fa7408912c0eda1d3baf7bd%22%2C%22tagIds%22:%5B%5D%7D%2C%7B%22point%22:%5B74915%2C49107%2C741%5D%2C%22type%22:%22point%22%2C%22id%22:%22e83d9025fca0be5615db1bbf2c8c3bf120c06114%22%2C%22tagIds%22:%5B%5D%7D%2C%7B%22point%22:%5B91463%2C53461%2C2022%5D%2C%22type%22:%22point%22%2C%22id%22:%22ee865559911252aab0ece61414540f0f66a83910%22%2C%22tagIds%22:%5B%5D%7D%2C%7B%22point%22:%5B58743%2C55837%2C1983%5D%2C%22type%22:%22point%22%2C%22id%22:%2223

06f135b50cbdae1b088a2130a80f35aa72f44c%22%2C%22tagIds%22:%5B%5D%7D%2C%7B%22point%22:%5B96351%2C70715%2C17%5D%2C%22type%22:%22point%22%2C%22id%22:%22987b1f9620c3fd1a6ec5e5ebbf1b3ce7e622ce8b%22%2C%22tagIds%22:%5B%5D%7D%2C%7B%22point%22:%5B93460%2C61620%2C848%5D%2C%22type%22:%22point%22%2C%22id%22:%22e5b3baf423a8086843a42c55209e82bfa11f7c1%22%2C%22tagIds%22:%5B%5D%7D%2C%7B%22point%22:%5B75250%2C69334%2C727%5D%2C%22type%22:%22point%22%2C%22id%22:%22a743afaa2c34002cf188d41fe2d2a72e8b3fa1a5%22%2C%22tagIds%22:%5B%5D%7D%2C%7B%22point%22:%5B77509%2C63675%2C546%5D%2C%22type%22:%22point%22%2C%22id%22:%2270741cd7be8d61a777fae3957206fd30f4ac4b3c%22%2C%22tagIds%22:%5B%5D%7D%2C%7B%22point%22:%5B61377%2C67652%2C719%5D%2C%22type%22:%22point%22%2C%22id%22:%22838eca1c81fde3679fb3fd4d226c7a9feb6ed6ab%22%2C%22tagIds%22:%5B%5D%7D%2C%7B%22point%22:%5B50893%2C62976%2C1384%5D%2C%22type%22:%22point%22%2C%22id%22:%22b846b274c4752f6b5271286a6f852466cb1003e9%22%2C%22tagIds%22:%5B%5D%7D%2C%7B%22point%22:%5B67917%2C60667%2C1746%5D%2C%22type%22:%22point%22%2C%22id%22:%2260d8d95cd4b121b0c7caebc09d367d539db308ca%22%2C%22tagIds%22:%5B%5D%7D%5D%2C%22annotationTags%22:%5B%5D%2C%22voxelSize%22:%5B4%2C4%2C40%5D%2C%22bracketShortcutsShowSegmentation%22:false%2C%22annotationSelectionShowsSegmentation%22:false%2C%22name%22:%22EC%20nucleus%22%7D%2C%7B%22tool%22:%22annotatePoint%22%2C%22selectedAnnotation%22:%7B%22id%22:%22bc018f96d420892223024409f8f75903c7050b35%22%7D%2C%22annotationColor%22:%22#ff0000%22%2C%22type%22:%22annotation%22%2C%22annotations%22:%5B%7B%22point%22:%5B92486%2C51348%2C1943%5D%2C%22type%22:%22point%22%2C%22id%22:%22d0e52aed733e360ba7613a32e7a4417409f1cffd%22%2C%22description%22:%22orange%22%2C%22tagIds%22:%5B%5D%7D%2C%7B%22point%22:%5B82573%2C68644%2C1770%5D%2C%22type%22:%22point%22%2C%22id%22:%22d8791660a76238cd41655f2cb8fe59889e63600d%22%2C%22description%22:%221st%20order%20%228vein%29%22%2C%22tagIds%22:%5B%5D%7D%2C%7B%22point%22:%5B92903%2C50044%2C1928%5D%2C%22type%22:%22point%22%2C%22id%22:%2273bf336634097876257bb1d7fd25405f97498e85%22%2C%22description%22:%22orange%22%2C%22tagIds%22:%5B%5D%7D%2C%7B%22point%22:%5B92873%2C50102%2C1919%5D%2C%22type%22:%22point%22%2C%22id%22:%22156b29a3d5fbc368d13e4de7479b7469d553a5a1%22%2C%22description%22:%22orange%22%2C%22tagIds%22:%5B%5D%7D%2C%7B%22point%22:%5B92764%2C53304%2C646%5D%2C%22type%22:%22point%22%2C%22id%22:%22f490c5421380865e5708190eac7ec4dd0b561e4%22%2C%22description%22:%22hot%20pink%22%2C%22tagIds%22:%5B%5D%7D%2C%7B%22point%22:%5B92409%2C52557%2C655%5D%2C%22type%22:%22point%22%2C%22id%22:%22486008abf6d90bc0a5f9c388fef47f2e534538b5%22%2C%22description%22:%22hot%20pink%22%2C%22tagIds%22:%5B%5D%7D%2C%7B%22point%22:%5B70589%2C46121%2C1497%5D%2C%22type%22:%22point%22%2C%22id%22:%222b3771e5432509d2d82a29ba13a4e50a2327d69d6%22%2C%22description%22:%22green%22%2C%22tagIds%22:%5B%5D%7D%2C%7B%22point%22:%5B90895%2C47477%2C720%5D%2C%22type%22:%22point%22%2C%22id%22:%226f639dacc16db2b6f6aa92f4be2a6d69560383b3%22%2C%22description%22:%22orange%22%2C%22tagIds%22:%5B%5D%7D%2C%7B%22point%22:%5B93011%2C53717%2C821%5D%2C%22type%22:%22point%22%2C%22id%22:%22c32c9991a53226ab752ffa3027383356dee22ba3%22%2C%22description%22:%22hot%20pink%22%2C%22tagIds%22:%5B%5D%7D%2C%7B%22point%22:%5B92517%2C52463%2C1882%5D%2C%22type%22:%22point%22%2C%22id%22:%22464d7caa155fba3d1eebacb43c9c0b72e8759522%22%2C%22description%22:%22orange%22%2C%22tagIds%22:%5B%5D%7D%2C%7B%22point%22:%5B92547%2C52884%2C1907%5D%2C%22type%22:%22point%22%2C%22id%22:%227f0359f57eb7c47a925ebd3a05473df73cab508a%22%2C%22description%22:%22orange%22%2C%22tagIds%22:%5B%5D%7D%2C%7B%22p

oint%22:%5B92727%2C52808%2C1915%5D%2C%22type%22:%22point%22%2C%22id%22:%22c5ca7f4c7e484859dfcf7c0df55650dc2cf054a5%22%2C%22description%22:%22orange%22%2C%22tagIds%22:%5B%5D%7D%2C%7B%22point%22:%5B93435%2C49703%2C1926%5D%2C%22type%22:%22point%22%2C%22id%22:%224df24b5a67c2901986c81e737551d323f6d8c483%22%2C%22description%22:%22orange%22%2C%22tagIds%22:%5B%5D%7D%2C%7B%22point%22:%5B90396%2C48516%2C1995%5D%2C%22type%22:%22point%22%2C%22id%22:%223b08734091933723084a6d7a0f6d25de16d8aefd%22%2C%22description%22:%22orange%22%2C%22tagIds%22:%5B%5D%7D%2C%7B%22point%22:%5B93612%2C57209%2C2008%5D%2C%22type%22:%22point%22%2C%22id%22:%22d0e16543445497d5ccce399fffa85d0f141800da%22%2C%22description%22:%22orange%22%2C%22tagIds%22:%5B%5D%7D%2C%7B%22point%22:%5B92984%2C52872%2C1948%5D%2C%22type%22:%22point%22%2C%22id%22:%22b005adac3afeaffa46982fb32b737b12aa07002e%22%2C%22description%22:%22orange%22%2C%22tagIds%22:%5B%5D%7D%2C%7B%22point%22:%5B88813%2C47727%2C1844%5D%2C%22type%22:%22point%22%2C%22id%22:%22b1ef7ef348d4126207ab8f76237d95b3fae0bca%22%2C%22description%22:%22orange%22%2C%22tagIds%22:%5B%5D%7D%2C%7B%22point%22:%5B64626%2C47409%2C2167%5D%2C%22type%22:%22point%22%2C%22id%22:%220b2c71d1a5ddd60cc618cda49abcbb9bac0de72a%22%2C%22description%22:%22green%22%2C%22tagIds%22:%5B%5D%7D%2C%7B%22point%22:%5B66223%2C45977%2C2091%5D%2C%22type%22:%22point%22%2C%22id%22:%2250de8bf73fbabb3035c7b7c9a3e426724fdcc89%22%2C%22description%22:%22green%5Cn%22%2C%22tagIds%22:%5B%5D%7D%2C%7B%22point%22:%5B67748%2C45827%2C2089%5D%2C%22type%22:%22point%22%2C%22id%22:%223e0cbacff0141eb80f1c17c712f697e3adc6de16%22%2C%22description%22:%22green%22%2C%22tagIds%22:%5B%5D%7D%2C%7B%22point%22:%5B63474%2C48233%2C1996%5D%2C%22type%22:%22point%22%2C%22id%22:%22628dcd904de65bfcbeb28c10f6b980ea6f8f5d52%22%2C%22description%22:%22green%5Cn%22%2C%22tagIds%22:%5B%5D%7D%2C%7B%22point%22:%5B63403%2C48406%2C1978%5D%2C%22type%22:%22point%22%2C%22id%22:%226a9fc28b6c3a35eead85eabeeade736b50f89edd%22%2C%22description%22:%22green%22%2C%22tagIds%22:%5B%5D%7D%2C%7B%22point%22:%5B70157%2C45021%2C1528%5D%2C%22type%22:%22point%22%2C%22id%22:%2281f4c842fd8da16c789e98832bb9c8032095749d%22%2C%22description%22:%22green%22%2C%22tagIds%22:%5B%5D%7D%2C%7B%22point%22:%5B70369%2C45778%2C1503%5D%2C%22type%22:%22point%22%2C%22id%22:%225004c2e8ab31ac829bf871e5c7fe71b85a3e6afb%22%2C%22description%22:%22green%22%2C%22tagIds%22:%5B%5D%7D%2C%7B%22point%22:%5B72681%2C45891%2C1548%5D%2C%22type%22:%22point%22%2C%22id%22:%227c92b203c023ea2b87795c690f9271cdc42084ba%22%2C%22description%22:%22green%22%2C%22tagIds%22:%5B%5D%7D%2C%7B%22point%22:%5B51277%2C62186%2C1221%5D%2C%22type%22:%22point%22%2C%22id%22:%2257d5daf1eedd84eb984385e420883cb924da9062%22%2C%22description%22:%22white%5Cn%22%2C%22tagIds%22:%5B%5D%7D%2C%7B%22point%22:%5B74743%2C72972%2C688%5D%2C%22type%22:%22point%22%2C%22id%22:%221b33defd4be01eb931e957db635587c90f717009%22%2C%22description%22:%22yellow%22%2C%22tagIds%22:%5B%5D%7D%2C%7B%22point%22:%5B76962%2C75118%2C741%5D%2C%22type%22:%22point%22%2C%22id%22:%22c4630fd29c7f9f4c9c1fad85ec5a8f5888c8bf92%22%2C%22description%22:%22yellow%22%2C%22tagIds%22:%5B%5D%7D%2C%7B%22point%22:%5B76636%2C74237%2C701%5D%2C%22type%22:%22point%22%2C%22id%22:%22f0691304ce2b17d9d2f72289ee97095745eed65d%22%2C%22description%22:%22yellow%22%2C%22tagIds%22:%5B%5D%7D%2C%7B%22point%22:%5B76621%2C74047%2C698%5D%2C%22type%22:%22point%22%2C%22id%22:%22343203e88b1993d2d9793ebdfd0d4888ee951d70%22%2C%22description%22:%22yellow%22%2C%22tagIds%22:%5B%5D%7D%2C%7B%22point%22:%5B76369%2C73518%2C686%5D%2C%22type%22:%22point%22%2C%22id%22:%22f4be5dcee82cb81ae56

8f1b0f8981e709e38d6ab%22%2C%22description%22:%22yellow%22%2C%22tagIds%22:%5B%5D%7D%2C%7B%22point%22:%5B75423%2C73144%2C668%5D%2C%22type%22:%22point%22%2C%22id%22:%2201aae4d70fa0b7aef8fa5d311f08c68ccf01ba2c%22%2C%22description%22:%22yellow%22%2C%22tagIds%22:%5B%5D%7D%2C%7B%22point%22:%5B75309%2C73105%2C668%5D%2C%22type%22:%22point%22%2C%22id%22:%2289e413082e0484ed9373fec9558e93b2e0c23dd7%22%2C%22description%22:%22yellow%22%2C%22tagIds%22:%5B%5D%7D%2C%7B%22point%22:%5B75017%2C73075%2C674%5D%2C%22type%22:%22point%22%2C%22id%22:%22264639d6708e9c7d71711b794967b35c27fe7f23%22%2C%22description%22:%22yellow%22%2C%22tagIds%22:%5B%5D%7D%2C%7B%22point%22:%5B77182%2C75500%2C763%5D%2C%22type%22:%22point%22%2C%22id%22:%22c47fb780df25960f46fff9317972ab652c3dfc62%22%2C%22description%22:%22yellow%22%2C%22tagIds%22:%5B%5D%7D%2C%7B%22point%22:%5B74947%2C73025%2C675%5D%2C%22type%22:%22point%22%2C%22id%22:%22ad5a0e2d2e9b632106aa4b979a41d10c55b20a32%22%2C%22description%22:%22yellow%22%2C%22tagIds%22:%5B%5D%7D%2C%7B%22point%22:%5B75373%2C68883%2C639%5D%2C%22type%22:%22point%22%2C%22id%22:%229e5f8e89d27da04ba7683ca0bda0d211c40ceba9%22%2C%22description%22:%22yellow%22%2C%22tagIds%22:%5B%5D%7D%2C%7B%22point%22:%5B75421%2C70093%2C633%5D%2C%22type%22:%22point%22%2C%22id%22:%229be048030ca1518585b64c041c9174fc21b95b23%22%2C%22description%22:%22yellow%22%2C%22tagIds%22:%5B%5D%7D%2C%7B%22point%22:%5B75373%2C68883%2C639%5D%2C%22type%22:%22point%22%2C%22id%22:%22afca332a7f13fb97cb1720f7e56e445ea0f24213%22%2C%22description%22:%22yellow%5Cn%22%2C%22tagIds%22:%5B%5D%7D%2C%7B%22point%22:%5B79317%2C64435%2C631%5D%2C%22type%22:%22point%22%2C%22id%22:%22e93d9ec4e3a9478af35a6144c2ee42cd29a50895%22%2C%22description%22:%22yellow%22%2C%22tagIds%22:%5B%5D%7D%2C%7B%22point%22:%5B75209%2C72749%2C708%5D%2C%22type%22:%22point%22%2C%22id%22:%222b52b031f61ac4a3af730ece00cea39d5c849536%22%2C%22description%22:%22yellow%22%2C%22tagIds%22:%5B%5D%7D%2C%7B%22point%22:%5B76701%2C74253%2C698%5D%2C%22type%22:%22point%22%2C%22id%22:%2288fe64358285bb8f4672571415f981b6ef07ebc6%22%2C%22description%22:%22yellow%22%2C%22tagIds%22:%5B%5D%7D%2C%7B%22point%22:%5B82040.4453125%2C50857.63671875%2C1964%5D%2C%22type%22:%22point%22%2C%22id%22:%2247fc291d44790998f13ccb961e98002fa0586e55%22%2C%22description%22:%22hot%20pink%22%2C%22tagIds%22:%5B%5D%7D%2C%7B%22point%22:%5B83495.09375%2C49090.59765625%2C1935.962890625%5D%2C%22type%22:%22point%22%2C%22id%22:%22846e5607b25384723099bd672490008443b7e447%22%2C%22description%22:%22hot%20pink%22%2C%22tagIds%22:%5B%5D%7D%2C%7B%22point%22:%5B104247.5234375%2C65321.98828125%2C1438.633056640625%5D%2C%22type%22:%22point%22%2C%22id%22:%22362b0001a91ae2bd0211aa9c36bfd6e41426e5e%22%2C%22description%22:%22hot%20pink%22%2C%22tagIds%22:%5B%5D%7D%2C%7B%22point%22:%5B74481.734375%2C70783.3125%2C743.9506225585938%5D%2C%22type%22:%22point%22%2C%22id%22:%2219eacf821e288bec21287e230baffc4f0a3cc1e2%22%2C%22description%22:%22yellow%22%2C%22tagIds%22:%5B%5D%7D%2C%7B%22point%22:%5B65826.15625%2C45794.37109375%2C2119%5D%2C%22type%22:%22point%22%2C%22id%22:%22676a29f14ef78a450477a8ae21167e6e3ffdbfae%22%2C%22description%22:%22green%22%2C%22tagIds%22:%5B%5D%7D%2C%7B%22point%22:%5B64513.01171875%2C47968.421875%2C2096%5D%2C%22type%22:%22point%22%2C%22id%22:%22f67e2af410e301808714c9336003fbd48fba7b41%22%2C%22description%22:%22green%5Cn%22%2C%22tagIds%22:%5B%5D%7D%2C%7B%22point%22:%5B64283.203125%2C47883.046875%2C2097%5D%2C%22type%22:%22point%22%2C%22id%22:%22d861a0deee70c9f55fc3d47ef84c8890ad3a1748%22%2C%22description%22:%22green%22%2C%22tagIds%22:%5B%5D%7D%2C%7B%22point%22:%5B67632.5703125%2C46059.49609375%2C1979%5D%2

C%22type%22:%22point%22%2C%22id%22:%22bcb8939dba25c2caffb3a0e956fe4c42d15d2ba%22%2C%22description%22:%22green%22%2C%22tagIds%22:%22%5B%5D%7D%2C%7B%22point%22:%22%5B68480.265625%2C46178.265625%2C1925%5D%2C%22type%22:%22point%22%2C%22id%22:%22c5705a3c693f8f3a674515434e6be8b338f18c30%22%2C%22description%22:%22green%22%2C%22tagIds%22:%22%5B%5D%7D%2C%7B%22point%22:%22%5B68508.515625%2C45963.98828125%2C1857%5D%2C%22type%22:%22point%22%2C%22id%22:%22a9f9ea0609a56bb8c32d8b81a7cc2a4416d63e93%22%2C%22description%22:%22green%22%2C%22tagIds%22:%22%5B%5D%7D%2C%7B%22point%22:%22%5B69327.6875%2C45926.86328125%2C1731%5D%2C%22type%22:%22point%22%2C%22id%22:%22e2e88c88f6ef37b55d7728e9a2e2db144b9f4b25%22%2C%22description%22:%22green%22%2C%22tagIds%22:%22%5B%5D%7D%2C%7B%22point%22:%22%5B70534.2578125%2C46231.53125%2C1587%5D%2C%22type%22:%22point%22%2C%22id%22:%227ea9dabf0d51263dd1b3da7383c206c4304635c1%22%2C%22description%22:%22green%22%2C%22tagIds%22:%22%5B%5D%7D%2C%7B%22point%22:%22%5B70909.546875%2C46441.3671875%2C1547%5D%2C%22type%22:%22point%22%2C%22id%22:%22e6a47dcce71fb9a9a4321a21bc35579dc6412813%22%2C%22description%22:%22green%22%2C%22tagIds%22:%22%5B%5D%7D%2C%7B%22point%22:%22%5B61728.2734375%2C48942.75390625%2C1540.0338134765625%5D%2C%22type%22:%22point%22%2C%22id%22:%22207aebcc37294ecef14d06b0ed5413970be06794d%22%2C%22description%22:%22green%22%2C%22tagIds%22:%22%5B%5D%7D%2C%7B%22point%22:%22%5B62289.1875%2C48635.26171875%2C1283.0338134765625%5D%2C%22type%22:%22point%22%2C%22id%22:%2228c0191e02a260cc02b423144d69d9ad8d4a1ec85%22%2C%22description%22:%22green%22%2C%22tagIds%22:%22%5B%5D%7D%2C%7B%22point%22:%22%5B62789.56640625%2C48283.37890625%2C1159.0338134765625%5D%2C%22type%22:%22point%22%2C%22id%22:%22239aa32d0ca11572acd4e43308e763fc539e21c43%22%2C%22description%22:%22green%22%2C%22tagIds%22:%22%5B%5D%7D%2C%7B%22point%22:%22%5B61921.81640625%2C49024.69921875%2C1676.8988037109375%5D%2C%22type%22:%22point%22%2C%22id%22:%22266fc778adcb56d1495a84ee388e3ce56b032e547%22%2C%22description%22:%22green%22%2C%22tagIds%22:%22%5B%5D%7D%2C%7B%22point%22:%22%5B77387%2C75369.546875%2C708%5D%2C%22type%22:%22point%22%2C%22id%22:%22c4bc6104e498db02629a3a34abf1e51754883df2%22%2C%22tagIds%22:%22%5B%5D%7D%2C%7B%22point%22:%22%5B66683.6640625%2C46106.8046875%2C2092%5D%2C%22type%22:%22point%22%2C%22id%22:%22e52da64e3b1a0c65f45cfd552399cb08315641b9%22%2C%22tagIds%22:%22%5B%5D%7D%2C%7B%22point%22:%22%5B65833.984375%2C45472.21875%2C2091%5D%2C%22type%22:%22point%22%2C%22id%22:%22c70218d6380921de19662c4d6fc816fad24d0cf0%22%2C%22tagIds%22:%22%5B%5D%7D%2C%7B%22point%22:%22%5B67277.09375%2C45997.10546875%2C2013%5D%2C%22type%22:%22point%22%2C%22id%22:%2240232110e13b22624f95a81c5edc1ebcb49bbe92%22%2C%22tagIds%22:%22%5B%5D%7D%2C%7B%22point%22:%22%5B74125.2578125%2C71603.6796875%2C754%5D%2C%22type%22:%22point%22%2C%22id%22:%22dd6eb955817221fe78ceebabd3b78d005a375743%22%2C%22tagIds%22:%22%5B%5D%7D%2C%7B%22point%22:%22%5B92465.1796875%2C49185.09375%2C1979%5D%2C%22type%22:%22point%22%2C%22id%22:%222739a47546a6ef0d1a3b7493538b6d729f38da068%22%2C%22tagIds%22:%22%5B%5D%7D%2C%7B%22point%22:%22%5B77947.5234375%2C63838.55078125%2C721%5D%2C%22type%22:%22point%22%2C%22id%22:%22a7d15c1bf03654c02a8b87fb43243c9f7a12fbc4%22%2C%22tagIds%22:%22%5B%5D%7D%2C%7B%22point%22:%22%5B62514.96484375%2C48501.015625%2C1273%5D%2C%22type%22:%22point%22%2C%22id%22:%22bc018f96d420892223024409f8f75903c7050b35%22%2C%22tagIds%22:%22%5B%5D%7D%5D%2C%22annotationTags%22:%22%5B%5D%2C%22voxelSize%22:%22%5B4%2C4%2C40%5D%2C%22bracketShortcutsShowSegmentation%22:false%2C%22annotationSelectionShowsSegmentation%22:false%2C%22name%22:%22EC%20pegs%22%7D%5D%2C%22navigation%22:%22%7B%22pose%22:%22%7B%22position%22:%22%7B%22voxelSize%22:%22%5B4%2C4%2C40%5D%2C%22voxelCoordi

nates%22:%5B72710.484375%2C53091.01953125%2C2152.000732421875%5D%7D%7D%2C%22zoomFactor%22:40.99902501717963%7D%2C%22showAxisLines%22:false%2C%22perspectiveOrientation%22:%5B-0.05632186681032181%2C-0.11770738661289215%2C0.012483260594308376%2C-0.9913712739944458%5D%2C%22perspectiveZoom%22:6540.292140855514%2C%22selectedLayer%22:%7B%22layer%22:%22Pericyte%205%22%2C%22visible%22:true%2C%22size%22:290%7D%2C%22layout%22:%22xy-3d%22%7D
