# Supplementary material
Source: PubMed Central journal article supplement (PMC8393306)
Supplement: sj-pdf-2-jcb-10.1177_0271678X211012836.pdf [file sj-pdf-2-jcb-10.1177_0271678X211012836.pdf]

<https://neuromancer-seung->

import.appspot.com/#!%7B%22layers%22:%5B%7B%22source%22:%22precomputed://gs://microns\_public\_datasets/pinky100\_v0/son\_of\_alignment\_v15\_rechunked%22%2C%22type%22:%22image%22%2C%22opacity%22:0.48%2C%22blend%22:%22default%22%2C%22shaderControls%22:%7B%7D%2C%22name%22:%22EM%22%7D%2C%7B%22annotationColor%22:%22#000000%22%2C%22source%22:%22precomputed://gs://microns\_public\_datasets/pinky100\_v185/seg%22%2C%22type%22:%22segmentation%22%2C%22selectedAlpha%22:0.04%2C%22notSelectedAlpha%22:0.16%2C%22saturation%22:0.33%2C%22objectAlpha%22:0.15%2C%22hideSegmentZero%22:false%2C%22segments%22:%5B%220%22%2C%22648518346349526102%22%2C%225D%2C%22skeletonRendering%22:%7B%22mode2d%22:%22lines\_and\_points%22%2C%22mode3d%22:%22lines%22%7D%2C%22name%22:%22seg%20v185%22%7D%2C%7B%22tool%22:%22annotateLine%22%2C%22type%22:%22annotation%22%2C%22annotations%22:%5B%7B%22center%22:%5B52553%2C62619%2C1153%5D%2C%22radii%22:%5B743%2C743%2C74%5D%2C%22type%22:%22ellipsoid%22%2C%22id%22:%221485f27ae0c56327f3f29130efc41b986508ad8f%22%2C%22tagIds%22:%5B%5D%7D%2C%7B%22center%22:%5B74278%2C71947%2C684%5D%2C%22radii%22:%5B851%2C851%2C85%5D%2C%22type%22:%22ellipsoid%22%2C%22id%22:%22a3b3b45246ce67063e3d05d39bae3be15b7cb8e9%22%2C%22tagIds%22:%5B%5D%7D%2C%7B%22center%22:%5B64668%2C46653%2C2128%5D%2C%22radii%22:%5B875%2C875%2C87%5D%2C%22type%22:%22ellipsoid%22%2C%22id%22:%22144e4ceb72e754d8f2a1fa5b046cdfb4554dec1%22%2C%22tagIds%22:%5B%5D%7D%2C%7B%22center%22:%5B91684%2C53632%2C713%5D%2C%22radii%22:%5B939%2C939%2C94%5D%2C%22type%22:%22ellipsoid%22%2C%22id%22:%229ac6128128588dcb352e95b0d7911e653bb7eb49%22%2C%22tagIds%22:%5B%5D%7D%2C%7B%22center%22:%5B94172%2C51023%2C1830%5D%2C%22radii%22:%5B854%2C854%2C85%5D%2C%22type%22:%22ellipsoid%22%2C%22id%22:%2261fccf4f15b8a0dd3b6bb8a744b2bf745149aebb%22%2C%22tagIds%22:%5B%5D%7D%5D%2C%22annotationTags%22:%5B%5D%2C%22voxelSize%22:%5B4%2C4%2C40%5D%2C%22bracketShortcutsShowSegmentation%22:false%2C%22annotationSelectionShowsSegmentation%22:false%2C%22name%22:%22Per%20Nucleus%22%7D%2C%7B%22annotationColor%22:%22#0449ec%22%2C%22type%22:%22annotation%22%2C%22annotations%22:%5B%7B%22point%22:%5B76381%2C73768%2C1590%5D%2C%22type%22:%22point%22%2C%22id%22:%22bbf7109e5d50e25fddd29c084a44c348020c6ee%22%2C%22description%22:%22e\_nucleus%22%2C%22tagIds%22:%5B%5D%7D%2C%7B%22point%22:%5B74991%2C59251%2C1643%5D%2C%22type%22:%22point%22%2C%22id%22:%227bbaab9294415d7bad625421569038faa6d1c39c%22%2C%22tagIds%22:%5B%5D%7D%2C%7B%22point%22:%5B71207%2C44930%2C1436%5D%2C%22type%22:%22point%22%2C%22id%22:%22279a997fe01d0629e01682c777079f531d902d0d%22%2C%22tagIds%22:%5B%5D%7D%2C%7B%22point%22:%5B71289%2C44920%2C1515%5D%2C%22type%22:%22point%22%2C%22id%22:%22cb52874afa5a6015826dd46c4f999abd428c073a%22%2C%22tagIds%22:%5B%5D%7D%2C%7B%22point%22:%5B72371%2C39422%2C1766%5D%2C%22type%22:%22point%22%2C%22id%22:%22c912d9c8882d2eb3840351a432dfa07e08a9b9d7%22%2C%22tagIds%22:%5B%5D%7D%2C%7B%22point%22:%5B100175%2C62892%2C1816%5D%2C%22type%22:%22point%22%2C%22id%22:%22ead124045a29d145cf3b24a07903648851753%22%2C%22tagIds%22:%5B%5D%7D%2C%7B%22point%22:%5B115576%2C74286%2C1830%5D%2C%22type%22:%22point%22%2C%22id%22:%22e8d20e17fa38d86150b548dd085de3189d44fa19%22%2C%22tagIds%22:%5B%5D%7D%2C%7B%22point%22:%5B93680%2C50382%2C820%5D%2C%22type%22:%22point%22%2C%22id%22:%225c038d7f4b1cae5770b59a79a61d619fe2b7a69d%22%2C%22tagIds%22:%5B%5D%7D%2C%7B%22point%22:%5B91538%2C53160%2C820%5D%2C%22type%22:%22point%22%2C%22id%22:%22b36c07317fb471e9a46f9f0f8183f3bd5c1cddba%22%2C%22tagIds%22:%5B%5D%7D%2C%7B%22point%22:%5B97872%2C69646%2C953%5D%22

C%22type%22:%22point%22%2C%22id%22:%224f686b79c26095c8d06b9375ddf8eb1b5350696f%22%2C%22tagIds%22:%5B%5D%7D%2C%7B%22point%22:%5B85598%2C66725%2C373%5D%2C%22type%22:%22point%22%2C%22id%22:%22508cdbcb5835f4525f33cf92619832a4f254b92d%22%2C%22tagIds%22:%5B%5D%7D%2C%7B%22point%22:%5B100387%2C75905%2C1098%5D%2C%22type%22:%22point%22%2C%22id%22:%22575bf802cc38eae03f3e02568194b01a946653c0%22%2C%22tagIds%22:%5B%5D%7D%2C%7B%22point%22:%5B52744%2C58982%2C636%5D%2C%22type%22:%22point%22%2C%22id%22:%225eabc81fada461ed6c0956e639472586f0fb51e3%22%2C%22tagIds%22:%5B%5D%7D%2C%7B%22point%22:%5B71197%2C46186%2C1767%5D%2C%22type%22:%22point%22%2C%22id%22:%2228f244c312740a72fa7408912c0eda1d3baf7bd%22%2C%22tagIds%22:%5B%5D%7D%2C%7B%22point%22:%5B74915%2C49107%2C741%5D%2C%22type%22:%22point%22%2C%22id%22:%22e83d9025fca0be5615db1bbf2c8c3bf120c06114%22%2C%22tagIds%22:%5B%5D%7D%2C%7B%22point%22:%5B91463%2C53461%2C2022%5D%2C%22type%22:%22point%22%2C%22id%22:%22ee865559911252aab0ece61414540f0f66a83910%22%2C%22tagIds%22:%5B%5D%7D%2C%7B%22point%22:%5B58743%2C55837%2C1983%5D%2C%22type%22:%22point%22%2C%22id%22:%222306f135b50cbdae1b088a2130a80f35aa72f44c%22%2C%22tagIds%22:%5B%5D%7D%2C%7B%22point%22:%5B96351%2C70715%2C17%5D%2C%22type%22:%22point%22%2C%22id%22:%22987b1f9620c3fd1a6ec5e5ebbf1b3ce7e622ce8b%22%2C%22tagIds%22:%5B%5D%7D%2C%7B%22point%22:%5B93460%2C61620%2C848%5D%2C%22type%22:%22point%22%2C%22id%22:%22e5b3baf7e423a8086843a42c55209e82bfa11f7c1%22%2C%22tagIds%22:%5B%5D%7D%2C%7B%22point%22:%5B75250%2C69334%2C727%5D%2C%22type%22:%22point%22%2C%22id%22:%22a743afaa2c34002cf188d41fe2d2a72e8b3fa1a5%22%2C%22tagIds%22:%5B%5D%7D%2C%7B%22point%22:%5B77509%2C63675%2C546%5D%2C%22type%22:%22point%22%2C%22id%22:%2270741cd7be8d61a777fae3957206fd30f4ac4b3c%22%2C%22tagIds%22:%5B%5D%7D%2C%7B%22point%22:%5B61377%2C67652%2C719%5D%2C%22type%22:%22point%22%2C%22id%22:%22283eca1c81fde3679fb3fd4d226c7a9feb6ed6ab%22%2C%22tagIds%22:%5B%5D%7D%2C%7B%22point%22:%5B50893%2C62976%2C1384%5D%2C%22type%22:%22point%22%2C%22id%22:%22b846b274c4752f6b5271286a6f852466cb1003e9%22%2C%22tagIds%22:%5B%5D%7D%2C%7B%22point%22:%5B67917%2C60667%2C1746%5D%2C%22type%22:%22point%22%2C%22id%22:%2260d8d95cd4b121b0c7caebc09d367d539db308ca%22%2C%22tagIds%22:%5B%5D%7D%5D%2C%22annotationTags%22:%5B%5D%2C%22voxelSize%22:%5B4%2C4%2C40%5D%2C%22bracketShortcutsShowSegmentation%22:false%2C%22annotationSelectionShowsSegmentation%22:false%2C%22name%22:%22EC%20nucleus%22%7D%2C%7B%22annotationColor%22:%22#00ffee%22%2C%22type%22:%22annotation%22%2C%22annotations%22:%5B%7B%22point%22:%5B67002%2C46028%2C2077%5D%2C%22type%22:%22point%22%2C%22id%22:%226bba07e86a64779ce2f5d6e210b7a3c691d45d93%22%2C%22tagIds%22:%5B%5D%7D%2C%7B%22point%22:%5B67175%2C46007%2C2050%5D%2C%22type%22:%22point%22%2C%22id%22:%225e4f8f5104a31df50d7724ae7acc820061a4d20%22%2C%22tagIds%22:%5B%5D%7D%2C%7B%22point%22:%5B67379%2C45964%2C2029%5D%2C%22type%22:%22point%22%2C%22id%22:%228f16cf12fe3bf2aca6991bfecb09de8649a72f84%22%2C%22tagIds%22:%5B%5D%7D%2C%7B%22point%22:%5B67594%2C46010%2C2015%5D%2C%22type%22:%22point%22%2C%22id%22:%2279cba7d6e31c2496593839d564631a92c9f0d88a%22%2C%22tagIds%22:%5B%5D%7D%2C%7B%22point%22:%5B67996%2C46025%2C1968%5D%2C%22type%22:%22point%22%2C%22id%22:%223d3f7afac09912b3aaba7140a5ff1cafc20f91c7%22%2C%22tagIds%22:%5B%5D%7D%2C%7B%22point%22:%5B68266%2C46038%2C1923%5D%2C%22type%22:%22point%22%2C%22id%22:%228b767c195b5e38556176069e3d2da2dcc8b5e6af%22%2C%22tagIds%22:%5B%5D%7D%2C%7B%22point%22:%5B68351%2C46041%2C1916%5D%2C%22type%22:%22point%22%2C%22id%22:%22e7553242bf3e385e053bb0c24fa9927c0bdebd6f%22%2C%22tagIds%22:%5B%5D%7D%2C%7B

%22point%22:%5B68567%2C46012%2C1887%5D%2C%22type%22:%22point%22%2C%22id%22:%226359c7d0b11b9cd6cf6baa72aa383b85ee0e0785%22%2C%22tagIds%22:%5B%5D%7D%2C%7B%22point%22:%5B68983%2C46114%2C1828%5D%2C%22type%22:%22point%22%2C%22id%22:%2298246520b559f56cd24f82ed92e92f97a0b77eb2%22%2C%22tagIds%22:%5B%5D%7D%2C%7B%22point%22:%5B68712%2C46071%2C1873%5D%2C%22type%22:%22point%22%2C%22id%22:%2236ac1b579e149e5ecacb69d847b7e811c6bf6816%22%2C%22tagIds%22:%5B%5D%7D%2C%7B%22point%22:%5B68100%2C46017%2C1942%5D%2C%22type%22:%22point%22%2C%22id%22:%227a49cf6ff55a9b387315bc3e6e2fde1229b4efd0%22%2C%22tagIds%22:%5B%5D%7D%2C%7B%22point%22:%5B69004%2C46109%2C1822%5D%2C%22type%22:%22point%22%2C%22id%22:%22c1229abf01ef733436fb93e89a207af577029850%22%2C%22tagIds%22:%5B%5D%7D%2C%7B%22point%22:%5B69440%2C46086%2C1741%5D%2C%22type%22:%22point%22%2C%22id%22:%220d84b467c6187285fd8fdc31909abd4ddcc41723%22%2C%22tagIds%22:%5B%5D%7D%2C%7B%22point%22:%5B69467%2C46084%2C1733%5D%2C%22type%22:%22point%22%2C%22id%22:%228690e69a273e3f802137f88fb353d23ae49bff5c%22%2C%22tagIds%22:%5B%5D%7D%2C%7B%22point%22:%5B69479%2C46083%2C1731%5D%2C%22type%22:%22point%22%2C%22id%22:%229f4c42891e7c516a8895b898be202405e1efb72a%22%2C%22tagIds%22:%5B%5D%7D%2C%7B%22point%22:%5B69808%2C46104%2C1693%5D%2C%22type%22:%22point%22%2C%22id%22:%221050fcec0c0bf881073a76058259782e2f15855e%22%2C%22tagIds%22:%5B%5D%7D%2C%7B%22point%22:%5B69600%2C46087%2C1713%5D%2C%22type%22:%22point%22%2C%22id%22:%22d4e9fea9e0f237e0ffa6261b9b690556e91196ed%22%2C%22tagIds%22:%5B%5D%7D%2C%7B%22point%22:%5B69055%2C46129%2C1817%5D%2C%22type%22:%22point%22%2C%22id%22:%22babab2c2999431dbc1b0020a403057fb58748867%22%2C%22tagIds%22:%5B%5D%7D%2C%7B%22point%22:%5B68816%2C46004%2C1844%5D%2C%22type%22:%22point%22%2C%22id%22:%22f8db249316d19ed03a99e0601607de677ff65a37%22%2C%22tagIds%22:%5B%5D%7D%2C%7B%22point%22:%5B68152%2C46026%2C1938%5D%2C%22type%22:%22point%22%2C%22id%22:%22ca492ed425c6d95bd6e01590647e2e13c4184f26%22%2C%22tagIds%22:%5B%5D%7D%2C%7B%22point%22:%5B65946%2C45551%2C2086%5D%2C%22type%22:%22point%22%2C%22id%22:%22996a364c1ba98ee87276b7671e137745e14a86c2%22%2C%22tagIds%22:%5B%5D%7D%2C%7B%22point%22:%5B65891%2C45669%2C2103%5D%2C%22type%22:%22point%22%2C%22id%22:%2264ee53e751ac5d4a1e743e6ec1e5b4dc549fe28c%22%2C%22tagIds%22:%5B%5D%7D%2C%7B%22point%22:%5B66231%2C45986%2C2145%5D%2C%22type%22:%22point%22%2C%22id%22:%229c7acfba7c83e51d8cbc9996285aaceb6240e4d9%22%2C%22tagIds%22:%5B%5D%7D%2C%7B%22point%22:%5B65866%2C45973%2C2163%5D%2C%22type%22:%22point%22%2C%22id%22:%225d7db9588ed360d666ddb304a7db0ee782acf596%22%2C%22tagIds%22:%5B%5D%7D%2C%7B%22point%22:%5B64599%2C47907%2C2176%5D%2C%22type%22:%22point%22%2C%22id%22:%2208695e8e36d9023898705f899d5828258bd926eb%22%2C%22tagIds%22:%5B%5D%7D%2C%7B%22point%22:%5B64608%2C48143%2C2145%5D%2C%22type%22:%22point%22%2C%22id%22:%2257750130abf4e588a7bf0c2b2fb5e75b278d7626%22%2C%22tagIds%22:%5B%5D%7D%2C%7B%22point%22:%5B64483%2C48390%2C2134%5D%2C%22type%22:%22point%22%2C%22id%22:%22b2bcbdd6773ee8dc156330f2d8e1511bcdaabc5a%22%2C%22tagIds%22:%5B%5D%7D%2C%7B%22point%22:%5B66341%2C45963%2C2125%5D%2C%22type%22:%22point%22%2C%22id%22:%22863f7f562a39d93902ccdeaa1c10abc9ddcb55ed%22%2C%22tagIds%22:%5B%5D%7D%2C%7B%22point%22:%5B65757%2C45726%2C2129%5D%2C%22type%22:%22point%22%2C%22id%22:%22fe4e28d1c8187578e682326c3ef25b36d92c53f9%22%2C%22tagIds%22:%5B%5D%7D%2C%7B%22point%22:%5B64437%2C48457%2C2128%5D%2C%22type%22:%22point%22%2C%22id%22:%226aaf579f3f4c32e66b4ee07fccba4d5fb1f71a29%22%2C%22tagIds%22:%5B%5D%7D%2C%7B%22point%22:%5B64472%2C48435%2C2131%5D%2C%22type%22:%22point%22%2C%22id%22:%22a

7b227fbeb7ddb6ec70340a09ea276221a21cca5%22%2C%22tagIds%22:%5B%5D%7D%2C%7B%22point%22:%5B64572%2C48219%2C2143%5D%2C%22type%22:%22point%22%2C%22id%22:%226e9ccda6fb9ca1151223b20fda6fac7316ef423e%22%2C%22tagIds%22:%5B%5D%7D%2C%7B%22point%22:%5B64592%2C48157%2C2149%5D%2C%22type%22:%22point%22%2C%22id%22:%2225ba493c9d466530e204a4e64348315ba2f7be28%22%2C%22tagIds%22:%5B%5D%7D%2C%7B%22point%22:%5B64103%2C48725%2C2086%5D%2C%22type%22:%22point%22%2C%22id%22:%221d0ff88061637840a5706cfec7ab8762f287eff%22%2C%22tagIds%22:%5B%5D%7D%2C%7B%22point%22:%5B63946%2C48876%2C2076%5D%2C%22type%22:%22point%22%2C%22id%22:%22b65cc09a90d2de3f4d8e3d35e092d30866df3114%22%2C%22tagIds%22:%5B%5D%7D%2C%7B%22point%22:%5B63437%2C49125%2C2051%5D%2C%22type%22:%22point%22%2C%22id%22:%2271d9da98179e249535d71b95bbcf37c25ff60abb%22%2C%22tagIds%22:%5B%5D%7D%2C%7B%22point%22:%5B63409%2C49158%2C2046%5D%2C%22type%22:%22point%22%2C%22id%22:%2234dfb8d2a4bad238d1839ca956a3d465dc4858f9%22%2C%22tagIds%22:%5B%5D%7D%2C%7B%22point%22:%5B63428%2C49151%2C2047%5D%2C%22type%22:%22point%22%2C%22id%22:%221f3535b9105961de620b284c8c85b32b9ae9554d%22%2C%22tagIds%22:%5B%5D%7D%2C%7B%22point%22:%5B63302%2C49209%2C2032%5D%2C%22type%22:%22point%22%2C%22id%22:%2228e8e5f95cccb47a28e886c236bf77fc4f9945%22%2C%22tagIds%22:%5B%5D%7D%2C%7B%22point%22:%5B63180%2C49268%2C2017%5D%2C%22type%22:%22point%22%2C%22id%22:%2236c1cde95ff6601bc534fcb224d55ad64718594f%22%2C%22tagIds%22:%5B%5D%7D%2C%7B%22point%22:%5B63228%2C49254%2C2022%5D%2C%22type%22:%22point%22%2C%22id%22:%2228b409532c702759be576fcd4f105fb376554a021%22%2C%22tagIds%22:%5B%5D%7D%2C%7B%22point%22:%5B66552%2C45986%2C2105%5D%2C%22type%22:%22point%22%2C%22id%22:%2253c3c39ee00fcc148daa52355673d61f04516a40%22%2C%22tagIds%22:%5B%5D%7D%2C%7B%22point%22:%5B65921%2C45587%2C2089%5D%2C%22type%22:%22point%22%2C%22id%22:%223516deacc8a4cdb75afe498b90d68944a468ed2c%22%2C%22tagIds%22:%5B%5D%7D%2C%7B%22point%22:%5B65914%2C45585%2C2091%5D%2C%22type%22:%22point%22%2C%22id%22:%2228f4a4bd0627a69db3c2c9e93fc92865d7e62e9c3%22%2C%22tagIds%22:%5B%5D%7D%2C%7B%22point%22:%5B65901%2C45689%2C2107%5D%2C%22type%22:%22point%22%2C%22id%22:%22d7244502945dcf6d5f49ab5ae4a11e5f761d34c9%22%2C%22tagIds%22:%5B%5D%7D%2C%7B%22point%22:%5B65764%2C46065%2C2173%5D%2C%22type%22:%22point%22%2C%22id%22:%2217267e597ce58b6f4ee58f39da695646ef756ea1%22%2C%22tagIds%22:%5B%5D%7D%2C%7B%22point%22:%5B66017%2C46003%2C2157%5D%2C%22type%22:%22point%22%2C%22id%22:%2261390c5cd3bc87b0624f7e036184a78985865d58%22%2C%22tagIds%22:%5B%5D%7D%2C%7B%22point%22:%5B66354%2C45991%2C2129%5D%2C%22type%22:%22point%22%2C%22id%22:%2228d9683359bb320c1e3edb41e76645befa5e2b3b9%22%2C%22tagIds%22:%5B%5D%7D%2C%7B%22point%22:%5B65981%2C46012%2C2159%5D%2C%22type%22:%22point%22%2C%22id%22:%222b90eae11a853d1abf5f6ea65d0a47a8fcbf10a6%22%2C%22tagIds%22:%5B%5D%7D%2C%7B%22point%22:%5B64597%2C48163%2C2147%5D%2C%22type%22:%22point%22%2C%22id%22:%22fc203d5b0bb8f75c4ea9148bfe2a651a7b10b5ea%22%2C%22tagIds%22:%5B%5D%7D%2C%7B%22point%22:%5B64577%2C47990%2C2167%5D%2C%22type%22:%22point%22%2C%22id%22:%22946bd2595d994b3293e25b17121c3cd96412a207%22%2C%22tagIds%22:%5B%5D%7D%2C%7B%22point%22:%5B64559%2C48005%2C2160%5D%2C%22type%22:%22point%22%2C%22id%22:%227b4bb914dd02392d5c50ba8d0b10d82630836843%22%2C%22tagIds%22:%5B%5D%7D%2C%7B%22point%22:%5B64583%2C47985%2C2172%5D%2C%22type%22:%22point%22%2C%22id%22:%22bce123aae50b548e26397b585fd3bf2c27fb8c8a%22%2C%22tagIds%22:%5B%5D%7D%2C%7B%22point%22:%5B59244%2C68171%2C868%5D%2C%22type%22:%22point%22%2C%22id%22:%225a1924619f7f975b16943707f7bb8fe65c828ca9%22%2C%22tagIds%22:%5B%5D%7D%2C%7B%22po

int%22:%5B54587%2C65596%2C1209%5D%2C%22type%22:%22point%22%2C%22id%22:%22523cabfcc  
90aaba271d7fe69160c714864e98e46%22%2C%22tagIds%22:%5B%5D%7D%2C%7B%22point%22:%5B5  
1145%2C60552%2C1395%5D%2C%22type%22:%22point%22%2C%22id%22:%22742bd62ed5c6f383453  
83ab654e2e32d18e0d8e4%22%2C%22tagIds%22:%5B%5D%7D%2C%7B%22point%22:%5B50572%2C62  
261%2C1287%5D%2C%22type%22:%22point%22%2C%22id%22:%222a78713c7c1406ea2ee6d1c32c433  
bc11bdccd8e%22%2C%22tagIds%22:%5B%5D%7D%2C%7B%22point%22:%5B54868%2C66094%2C1067  
%5D%2C%22type%22:%22point%22%2C%22id%22:%22730bf8fb72d2696318fa93fd69962fd8679311b2  
%22%2C%22tagIds%22:%5B%5D%7D%2C%7B%22point%22:%5B54097%2C65219%2C1236%5D%2C%22t  
ype%22:%22point%22%2C%22id%22:%22fd4321eef23c47810654ed22b72fefac3357a12a%22%2C%22ta  
glds%22:%5B%5D%7D%2C%7B%22point%22:%5B53340%2C63277%2C1355%5D%2C%22type%22:%22p  
oint%22%2C%22id%22:%223e335ade9c61b62d2cf5d721060abf2ac1548f62%22%2C%22tagIds%22:%5B  
%5D%7D%2C%7B%22point%22:%5B61622%2C49361%2C1788%5D%2C%22type%22:%22point%22%2C  
%22id%22:%22e8b823a5c82c372ba4851d3eb8b364c4e6ee71d8%22%2C%22tagIds%22:%5B%5D%7D%  
2C%7B%22point%22:%5B61631%2C49359%2C1793%5D%2C%22type%22:%22point%22%2C%22id%22:  
%22fdf716152c2a3bc3878b6c771a6940052682cf13%22%2C%22tagIds%22:%5B%5D%7D%2C%7B%22po  
int%22:%5B62376%2C49518%2C1864%5D%2C%22type%22:%22point%22%2C%22id%22:%2285758fa1b  
c3f139d351a3d85b8116382821483d5%22%2C%22tagIds%22:%5B%5D%7D%2C%7B%22point%22:%5B6  
1061%2C48862%2C1528%5D%2C%22type%22:%22point%22%2C%22id%22:%22faf45940716780215dfe  
2901b05f9ad3dda2e1de%22%2C%22tagIds%22:%5B%5D%7D%2C%7B%22point%22:%5B61154%2C4878  
7%2C1450%5D%2C%22type%22:%22point%22%2C%22id%22:%2214ee2e388b2ea49a2306d22cdab433  
1265f1e035%22%2C%22tagIds%22:%5B%5D%7D%2C%7B%22point%22:%5B61785%2C48322%2C1273%  
5D%2C%22type%22:%22point%22%2C%22id%22:%2290a89bb943978d57cb8b24abe104ea8e9b52d6d1  
%22%2C%22tagIds%22:%5B%5D%7D%2C%7B%22point%22:%5B62712%2C48278%2C1204%5D%2C%22t  
ype%22:%22point%22%2C%22id%22:%222be5c112d5031b7b05ab2ac537fb61e98dc828de%22%2C%22t  
aglds%22:%5B%5D%7D%2C%7B%22point%22:%5B62406%2C48535%2C1021%5D%2C%22type%22:%22  
point%22%2C%22id%22:%2259b6dae5930ed4dae32463009aeaa7e96aaa5834%22%2C%22tagIds%22:%  
5B%5D%7D%2C%7B%22point%22:%5B62715%2C47873%2C1019%5D%2C%22type%22:%22point%22%2  
C%22id%22:%227f8a4918176b792bbd6a7086d5d53f4934dc68d3%22%2C%22taglds%22:%5B%5D%7D%  
2C%7B%22point%22:%5B62454%2C48588%2C999%5D%2C%22type%22:%22point%22%2C%22id%22:%  
220677bba1d90554efa5ab7148bd52ee0bbe46039%22%2C%22taglds%22:%5B%5D%7D%2C%7B%22po  
int%22:%5B62661%2C47904%2C999%5D%2C%22type%22:%22point%22%2C%22id%22:%22777299951f  
456b09e64bf64a077cece1e8beb02e%22%2C%22taglds%22:%5B%5D%7D%2C%7B%22point%22:%5B76  
753%2C68967%2C702%5D%2C%22type%22:%22point%22%2C%22id%22:%22539324f146e0c85a4b127  
1b6abf0993be862109c%22%2C%22taglds%22:%5B%5D%7D%2C%7B%22point%22:%5B76901%2C68656  
%2C689%5D%2C%22type%22:%22point%22%2C%22id%22:%2292733d6370a7496bc8b5d2e88099e301  
08f9c21c%22%2C%22taglds%22:%5B%5D%7D%2C%7B%22point%22:%5B77054%2C74776%2C706%5D  
%2C%22type%22:%22point%22%2C%22id%22:%22cd0d224edb8c82b828e393b8d7d581e8fcc83a9b%22  
%2C%22taglds%22:%5B%5D%7D%2C%7B%22point%22:%5B77057%2C74799%2C711%5D%2C%22type%  
22:%22point%22%2C%22id%22:%22b36e8f2db675213d21b911cdfc98fbba3315b8c2%22%2C%22taglds  
%22:%5B%5D%7D%2C%7B%22point%22:%5B77163%2C75531%2C756%5D%2C%22type%22:%22point%  
22%2C%22id%22:%223524d94fcb5755d3262ce7d617b89e0eff3a06b3%22%2C%22taglds%22:%5B%5D%  
7D%2C%7B%22point%22:%5B77228%2C68237%2C663%5D%2C%22type%22:%22point%22%2C%22id%  
22:%2267ac5646ee338538f1890491c29d366f617aef7e%22%2C%22taglds%22:%5B%5D%7D%2C%7B%2  
2point%22:%5B77367%2C67955%2C654%5D%2C%22type%22:%22point%22%2C%22id%22:%221f1f8d3

471b44cc053f15f050b1e76f3e4a542d6%22%2C%22tagIds%22:%5B%5D%7D%2C%7B%22point%22:%5B  
78085%2C64390%2C627%5D%2C%22type%22:%22point%22%2C%22id%22:%22b8871794d14365d84aa  
e70563b6212f4ff64d425%22%2C%22tagIds%22:%5B%5D%7D%2C%7B%22point%22:%5B77440%2C679  
97%2C597%5D%2C%22type%22:%22point%22%2C%22id%22:%2206fd158eb8afaf5776496c04d8479c52  
5c6d7536%22%2C%22tagIds%22:%5B%5D%7D%2C%7B%22point%22:%5B77727%2C65153%2C597%5D  
%2C%22type%22:%22point%22%2C%22id%22:%22448a2b1318e4b9b91744d44515046393655c6274%2  
2%2C%22tagIds%22:%5B%5D%7D%2C%7B%22point%22:%5B76252%2C64460%2C597%5D%2C%22type  
%22:%22point%22%2C%22id%22:%2229a40590a457b3f759916e22fe08f3f2ffbdac4%22%2C%22tagIds  
%22:%5B%5D%7D%2C%7B%22point%22:%5B79318%2C64060%2C627%5D%2C%22type%22:%22point%  
22%2C%22id%22:%22280d1417cc1da1bc4088e99a1542f72d3cf7019b%22%2C%22tagIds%22:%5B%5D%  
7D%2C%7B%22point%22:%5B79345%2C64559%2C622%5D%2C%22type%22:%22point%22%2C%22id%  
22:%222ff0c483fbd206178e3088f226cde511ff4ba44%22%2C%22tagIds%22:%5B%5D%7D%2C%7B%22  
point%22:%5B77789%2C66868%2C559%5D%2C%22type%22:%22point%22%2C%22id%22:%22be846fb  
518c027aaba3ec9c2979236e3d501ca60%22%2C%22tagIds%22:%5B%5D%7D%2C%7B%22point%22:%5  
B76260%2C64561%2C586%5D%2C%22type%22:%22point%22%2C%22id%22:%220b24b8b70af842a6d9  
4470f9d54667045db1aba2%22%2C%22tagIds%22:%5B%5D%7D%2C%7B%22point%22:%5B77723%2C65  
555%2C615%5D%2C%22type%22:%22point%22%2C%22id%22:%2203156d5bb30eb19a24c9e866cd019  
9fd692cfbc0%22%2C%22tagIds%22:%5B%5D%7D%2C%7B%22point%22:%5B77918%2C64370%2C656%  
5D%2C%22type%22:%22point%22%2C%22id%22:%22b928a172e3b28c6d3af2f26ea72d049575b73675%  
22%2C%22tagIds%22:%5B%5D%7D%2C%7B%22point%22:%5B76223%2C73815%2C712%5D%2C%22typ  
e%22:%22point%22%2C%22id%22:%2201266619668df92070eeb309b8db675b724c276b%22%2C%22ta  
glds%22:%5B%5D%7D%2C%7B%22point%22:%5B77000%2C74605%2C690%5D%2C%22type%22:%22poi  
nt%22%2C%22id%22:%22f9d5b47494d705c4c4e779bedb841cc98a0348d8%22%2C%22tagIds%22:%5B%  
5D%7D%2C%7B%22point%22:%5B77386%2C68276%2C629%5D%2C%22type%22:%22point%22%2C%22  
id%22:%225eef92973778be9e5955504c42c5a54b5047876b%22%2C%22tagIds%22:%5B%5D%7D%2C%7  
B%22point%22:%5B75438%2C73406%2C772%5D%2C%22type%22:%22point%22%2C%22id%22:%224dd  
6641f12214365a49357750c3c05d4c0a9851f%22%2C%22tagIds%22:%5B%5D%7D%2C%7B%22point%22  
:%5B92926%2C51898%2C1964%5D%2C%22type%22:%22point%22%2C%22id%22:%227d4850030d9d41  
eb9834e1837f8cf40ce2c775ce%22%2C%22tagIds%22:%5B%5D%7D%2C%7B%22point%22:%5B92971%2  
C51746%2C1936%5D%2C%22type%22:%22point%22%2C%22id%22:%228584266042636f980179365fe1  
dd61b13da994ec%22%2C%22tagIds%22:%5B%5D%7D%2C%7B%22point%22:%5B92936%2C51789%2C1  
944%5D%2C%22type%22:%22point%22%2C%22id%22:%22e29881f085601e18b0abb008829871391e45  
0da6%22%2C%22tagIds%22:%5B%5D%7D%2C%7B%22point%22:%5B93095%2C51565%2C1916%5D%2C  
%22type%22:%22point%22%2C%22id%22:%22c3cc2b33f68330401bbbee96000bb42ad6984edd%22%2C  
%22tagIds%22:%5B%5D%7D%2C%7B%22point%22:%5B93303%2C51258%2C1897%5D%2C%22type%22:  
%22point%22%2C%22id%22:%22b4b3ac20c0be7dbd5594b3767c33c9c34d7054b6%22%2C%22tagIds%2  
2:%5B%5D%7D%2C%7B%22point%22:%5B93045%2C51676%2C1922%5D%2C%22type%22:%22point%2  
2%2C%22id%22:%22d619104daade3a06ce962e053111f0130171b9a8%22%2C%22tagIds%22:%5B%5D%  
7D%2C%7B%22point%22:%5B93287%2C50622%2C1881%5D%2C%22type%22:%22point%22%2C%22id  
%22:%22177d4bb701943548a3a2c9bddc9bd82864950d8f%22%2C%22tagIds%22:%5B%5D%7D%2C%7B  
%22point%22:%5B93372%2C49302%2C1883%5D%2C%22type%22:%22point%22%2C%22id%22:%22e96  
78edb919c24182a61b75cb0138bdd948980a%22%2C%22tagIds%22:%5B%5D%7D%2C%7B%22point%2  
2:%5B92924%2C51889%2C1962%5D%2C%22type%22:%22point%22%2C%22id%22:%227901751c1f1f19  
f85379c3dc8c634b646165cf12%22%2C%22tagIds%22:%5B%5D%7D%2C%7B%22point%22:%5B93076%2

C49019%2C1926%5D%2C%22type%22:%22point%22%2C%22id%22:%227aa11e20c4cbf1401bd4379aca  
c0e21e216b7d31%22%2C%22tagIds%22:%5B%5D%7D%2C%7B%22point%22:%5B92709%2C49899%2C1  
928%5D%2C%22type%22:%22point%22%2C%22id%22:%22b637e957103a88ee199bd57c9fd700ff74e3a  
e82%22%2C%22tagIds%22:%5B%5D%7D%2C%7B%22point%22:%5B93117%2C49063%2C1921%5D%2C  
%22type%22:%22point%22%2C%22id%22:%224ca0f29dd6615ca7839afd2d066e0d5e7191d19c%22%2C  
%22tagIds%22:%5B%5D%7D%2C%7B%22point%22:%5B92760%2C49979%2C1921%5D%2C%22type%22:  
%22point%22%2C%22id%22:%2208f543b6377e872925b5995ba4c8de84849e5a78%22%2C%22tagIds%2  
2:%5B%5D%7D%2C%7B%22point%22:%5B92204%2C49432%2C1958%5D%2C%22type%22:%22point%2  
2%2C%22id%22:%22aea38e6b34ca46f03328d2570e4020d629e3d29b%22%2C%22tagIds%22:%5B%5D%  
7D%2C%7B%22point%22:%5B92724%2C48814%2C1958%5D%2C%22type%22:%22point%22%2C%22id  
%22:%2257bff5709a3682b5d40510172cfd4365348b3f95%22%2C%22tagIds%22:%5B%5D%7D%2C%7B%  
22point%22:%5B92897%2C48905%2C1946%5D%2C%22type%22:%22point%22%2C%22id%22:%2231fd  
9fdce30a987c7443ec7ae37e9da1a2945b0f%22%2C%22tagIds%22:%5B%5D%7D%2C%7B%22point%22:  
%5B92461%2C49643%2C1946%5D%2C%22type%22:%22point%22%2C%22id%22:%223f8c9cd288609e2  
1039e9c293326b71fd10ab525%22%2C%22tagIds%22:%5B%5D%7D%2C%7B%22point%22:%5B92782%2  
C50023%2C1917%5D%2C%22type%22:%22point%22%2C%22id%22:%220cd4beaa573edb9aaa9a36caf  
eacdcd123a2783%22%2C%22tagIds%22:%5B%5D%7D%2C%7B%22point%22:%5B92121%2C48534%2C1  
983%5D%2C%22type%22:%22point%22%2C%22id%22:%2242a9f49d5651a5c5e485989adfadeda83a21  
cf0%22%2C%22tagIds%22:%5B%5D%7D%2C%7B%22point%22:%5B92244%2C48579%2C1979%5D%2C%  
22type%22:%22point%22%2C%22id%22:%2283e6be04ef5dab0f785d86bfe27072a95d20d01e%22%2C%  
22tagIds%22:%5B%5D%7D%2C%7B%22point%22:%5B91450%2C49009%2C1974%5D%2C%22type%22:%  
22point%22%2C%22id%22:%22c6fa0085b9b0b8bb1245b5ea67a387a373fdc182%22%2C%22tagIds%22:  
%5B%5D%7D%2C%7B%22point%22:%5B92841%2C50156%2C1904%5D%2C%22type%22:%22point%22  
%2C%22id%22:%22313aaff2aeecf4813e8602b0d70ee8e0fb006420%22%2C%22tagIds%22:%5B%5D%7D  
%2C%7B%22point%22:%5B93076%2C49019%2C1926%5D%2C%22type%22:%22point%22%2C%22id%22  
:%2259b23181beff423ef61d659d161267962ee8690e%22%2C%22tagIds%22:%5B%5D%7D%2C%7B%22  
point%22:%5B93076%2C49019%2C1926%5D%2C%22type%22:%22point%22%2C%22id%22:%22faa6daa  
58a8796af33115d612da4648030147f42%22%2C%22tagIds%22:%5B%5D%7D%2C%7B%22point%22:%5B  
93084%2C49026%2C1928%5D%2C%22type%22:%22point%22%2C%22id%22:%227ff66730d4cc9503357  
8ee7efb030fe67f52a8ed%22%2C%22tagIds%22:%5B%5D%7D%2C%7B%22point%22:%5B95734%2C584  
51%2C1964%5D%2C%22type%22:%22point%22%2C%22id%22:%225bc1f6a48f7fc93d477209d69776305  
79b308e00%22%2C%22tagIds%22:%5B%5D%7D%2C%7B%22point%22:%5B92946%2C50970%2C1470%  
5D%2C%22type%22:%22point%22%2C%22id%22:%2271ec8330956589e068a055b296e92ac5019371fe%  
22%2C%22tagIds%22:%5B%5D%7D%2C%7B%22point%22:%5B94433%2C51058%2C1573%5D%2C%22ty  
pe%22:%22point%22%2C%22id%22:%2249d6dd734fdb6fc1c12267c0a0128c58dc1d6827%22%2C%22ta  
glds%22:%5B%5D%7D%2C%7B%22point%22:%5B94309%2C51307%2C1440%5D%2C%22type%22:%22p  
oint%22%2C%22id%22:%222d6bab7d5a332c453386a5bcb7d6225c8f8df67c%22%2C%22tagIds%22:%5B  
%5D%7D%2C%7B%22point%22:%5B93554%2C53013%2C649%5D%2C%22type%22:%22point%22%2C%  
22id%22:%22540b887c175d9629c20f9f6470c27141b6a9cb38%22%2C%22tagIds%22:%5B%5D%7D%2C  
%7B%22point%22:%5B91886%2C51436%2C729%5D%2C%22type%22:%22point%22%2C%22id%22:%22  
682debc74b4b3cd94d1cb8810351f9d938e8b9a1%22%2C%22tagIds%22:%5B%5D%7D%2C%7B%22point  
%22:%5B93427%2C52522%2C694%5D%2C%22type%22:%22point%22%2C%22id%22:%229d9b043d6a7  
dea7dde3860863bd4a68a980e186a%22%2C%22tagIds%22:%5B%5D%7D%2C%7B%22point%22:%5B934  
31%2C52624%2C685%5D%2C%22type%22:%22point%22%2C%22id%22:%229de14d9e2704a8126a6eaf

4afa5ebbb95b174628%22%2C%22tagIds%22:%5B%5D%7D%2C%7B%22point%22:%5B91901%2C51355%2C731%5D%2C%22type%22:%22point%22%2C%22id%22:%22db7c814c676494173d8ee6ac45642602f43105fc%22%2C%22tagIds%22:%5B%5D%7D%2C%7B%22point%22:%5B93427%2C52328%2C731%5D%2C%22type%22:%22point%22%2C%22id%22:%220d7f8edfbc9bfb6b86ced8c39cb86394d9867edc%22%2C%22tagIds%22:%5B%5D%7D%2C%7B%22point%22:%5B93832%2C53223%2C623%5D%2C%22type%22:%22point%22%2C%22id%22:%2292f95b274bb6e37b0f390e8e683d523c689fb731%22%2C%22tagIds%22:%5B%5D%7D%2C%7B%22point%22:%5B93940%2C53322%2C612%5D%2C%22type%22:%22point%22%2C%22id%22:%228c722feebe278a4e31e139263253b75412138b55%22%2C%22tagIds%22:%5B%5D%7D%2C%7B%22point%22:%5B92050%2C51892%2C677%5D%2C%22type%22:%22point%22%2C%22id%22:%22869cca3f61b85472167d813347433893cdc9f360%22%2C%22tagIds%22:%5B%5D%7D%2C%7B%22point%22:%5B91998%2C51892%2C684%5D%2C%22type%22:%22point%22%2C%22id%22:%223bfa8e3c1875c59980e5a75279d5c2b6daf17e3c%22%2C%22tagIds%22:%5B%5D%7D%2C%7B%22point%22:%5B92785%2C53341%2C756%5D%2C%22type%22:%22point%22%2C%22id%22:%2276d8366f82dd6f957d3d0a08adc7f21291e8a5ec%22%2C%22tagIds%22:%5B%5D%7D%2C%7B%22point%22:%5B92068%2C51881%2C674%5D%2C%22type%22:%22point%22%2C%22id%22:%22c537f495c84ec05b773c7221c3ed98b99a6f9b35%22%2C%22tagIds%22:%5B%5D%7D%2C%7B%22point%22:%5B93421%2C52287%2C744%5D%2C%22type%22:%22point%22%2C%22id%22:%22eb514a1723324ebaad89d6cf873fd023ce2c0970%22%2C%22tagIds%22:%5B%5D%7D%2C%7B%22point%22:%5B91780%2C53673%2C771%5D%2C%22type%22:%22point%22%2C%22id%22:%22d0135564869847cca8fe45fce2161a25cbc513d7%22%2C%22tagIds%22:%5B%5D%7D%2C%7B%22point%22:%5B91762%2C53709%2C776%5D%2C%22type%22:%22point%22%2C%22id%22:%22df310075f7525b70235b7a164b0600e70e735cf5%22%2C%22tagIds%22:%5B%5D%7D%2C%7B%22point%22:%5B91917%2C51686%2C700%5D%2C%22type%22:%22point%22%2C%22id%22:%225b328dc9b4b2949283af99f1b9b4567e08dedd6e%22%2C%22tagIds%22:%5B%5D%7D%2C%7B%22point%22:%5B93526%2C52830%2C667%5D%2C%22type%22:%22point%22%2C%22id%22:%22d3a420292edf079746382e78221e3d3d7e613520%22%2C%22tagIds%22:%5B%5D%7D%2C%7B%22point%22:%5B93625%2C53075%2C640%5D%2C%22type%22:%22point%22%2C%22id%22:%22b2b77cc2ef9f8874feb049206ee4284af0e550b2%22%2C%22tagIds%22:%5B%5D%7D%2C%7B%22point%22:%5B92421%2C52039%2C640%5D%2C%22type%22:%22point%22%2C%22id%22:%22dedb5f7de22a8ea577182b08ebd4ae937e3bdfde%22%2C%22tagIds%22:%5B%5D%7D%2C%7B%22point%22:%5B92575%2C52204%2C622%5D%2C%22type%22:%22point%22%2C%22id%22:%22e8aee3657db901e2bae22c0c368986c94cd7ec2d%22%2C%22tagIds%22:%5B%5D%7D%2C%7B%22point%22:%5B93170%2C51833%2C811%5D%2C%22type%22:%22point%22%2C%22id%22:%22bc7bc374084061f1f904422ca66614de25b18e9b%22%2C%22tagIds%22:%5B%5D%7D%2C%7B%22point%22:%5B91539%2C50335%2C806%5D%2C%22type%22:%22point%22%2C%22id%22:%229aa456dc8544a0994322f39e726b4d02b073dcb3%22%2C%22tagIds%22:%5B%5D%7D%2C%7B%22point%22:%5B91784%2C54258%2C809%5D%2C%22type%22:%22point%22%2C%22id%22:%22878884427ee4bc5941c8c41088f700653a4faa06%22%2C%22tagIds%22:%5B%5D%7D%2C%7B%22point%22:%5B93059%2C54074%2C439%5D%2C%22type%22:%22point%22%2C%22id%22:%22e80f842433be6be3fea0995f5ad7102b6a45e97%22%2C%22tagIds%22:%5B%5D%7D%2C%7B%22point%22:%5B94354%2C54195%2C437%5D%2C%22type%22:%22point%22%2C%22id%22:%2271879ce903b142a264cc87424bf4c9e1be2a39de%22%2C%22tagIds%22:%5B%5D%7D%2C%7B%22point%22:%5B94274%2C53618%2C545%5D%2C%22type%22:%22point%22%2C%22id%22:%22d3f1f8a953763f90d90c4bb98bb77430d10243ff%22%2C%22tagIds%22:%5B%5D%7D%2C%7B%22point%22:%5B92967%2C54648%2C357%5D%2C%22type%22:%22point%22%2C%22id%22:%22de423f431c0724daa67cb29aef2c411419c54d84%22%2C%22tagIds%22:%5B%5D%7D%2C%7B%22point%22:%5B94171%2C54599%2C312%5D%2C

%22type%22:%22point%22%2C%22id%22:%222eddf33d5fdd3433f8571911f616693801a76ebe%22%2C  
%22tagIds%22:%5B%5D%7D%2C%7B%22point%22:%5B93986%2C56223%2C154%5D%2C%22type%22:  
%22point%22%2C%22id%22:%22c17ed9018be9699f72f6cb36d2568efbada82ed3%22%2C%22tagIds%22  
:%5B%5D%7D%2C%7B%22point%22:%5B94116%2C54687%2C294%5D%2C%22type%22:%22point%22%  
2C%22id%22:%22067157335eb057e60f5f781ce47ae744b6f80ef8%22%2C%22tagIds%22:%5B%5D%7D%  
2C%7B%22point%22:%5B93385%2C52230%2C761%5D%2C%22type%22:%22point%22%2C%22id%22:%  
22c3e4d95d9dfc2ebd30c185a6719de45ad8dac4a6%22%2C%22tagIds%22:%5B%5D%7D%2C%7B%22poi  
nt%22:%5B67002%2C46028%2C2077%5D%2C%22type%22:%22point%22%2C%22id%22:%22a6019ae00  
c0ae392b5ce98f3c929e9f0efdadf90%22%2C%22tagIds%22:%5B%5D%7D%2C%7B%22point%22:%5B671  
75%2C46007%2C2050%5D%2C%22type%22:%22point%22%2C%22id%22:%223e0474cbe359fcc9f90a05  
f60a8da74739712c65%22%2C%22tagIds%22:%5B%5D%7D%2C%7B%22point%22:%5B67379%2C45964  
%2C2029%5D%2C%22type%22:%22point%22%2C%22id%22:%223b533483bd48bab03d25e49ef35fbff97  
1e0a988%22%2C%22tagIds%22:%5B%5D%7D%2C%7B%22point%22:%5B67594%2C46010%2C2015%5D  
%2C%22type%22:%22point%22%2C%22id%22:%2238a5d8f9c0bc90344ddb2298f110478119f0d5c6%22  
%2C%22tagIds%22:%5B%5D%7D%2C%7B%22point%22:%5B67996%2C46025%2C1968%5D%2C%22type  
%22:%22point%22%2C%22id%22:%226e389e51594930653ce54ffa60212a3208953ab8%22%2C%22tagId  
s%22:%5B%5D%7D%2C%7B%22point%22:%5B68266%2C46038%2C1923%5D%2C%22type%22:%22poin  
t%22%2C%22id%22:%22b45435f174323619541558dfb321adc402d0ef93%22%2C%22tagIds%22:%5B%5  
D%7D%2C%7B%22point%22:%5B68351%2C46041%2C1916%5D%2C%22type%22:%22point%22%2C%22  
id%22:%220b61555b40e35aad9da452fa17b7a271285bd8f9%22%2C%22tagIds%22:%5B%5D%7D%2C%7  
B%22point%22:%5B68567%2C46012%2C1887%5D%2C%22type%22:%22point%22%2C%22id%22:%22d4  
cf48a1bc1f4eab52dfdae6b3c6e878140b9b86%22%2C%22tagIds%22:%5B%5D%7D%2C%7B%22point%2  
2:%5B68983%2C46114%2C1828%5D%2C%22type%22:%22point%22%2C%22id%22:%22f07a3d038f3576  
f9d85b9c16c2cb1ad0696225e0%22%2C%22tagIds%22:%5B%5D%7D%2C%7B%22point%22:%5B68712%  
2C46071%2C1873%5D%2C%22type%22:%22point%22%2C%22id%22:%22db0f540f4e45befd73dd752ac  
7a86434e75f6279%22%2C%22tagIds%22:%5B%5D%7D%2C%7B%22point%22:%5B68100%2C46017%2C  
1942%5D%2C%22type%22:%22point%22%2C%22id%22:%2244c34164004bc4ec31f7d499919a5b377c57  
1ff6%22%2C%22tagIds%22:%5B%5D%7D%2C%7B%22point%22:%5B69004%2C46109%2C1822%5D%2C  
%22type%22:%22point%22%2C%22id%22:%22f2320a938e9818a9d2ae66a1cc7b59ea43f9f0d%22%2C  
%22tagIds%22:%5B%5D%7D%2C%7B%22point%22:%5B69440%2C46086%2C1741%5D%2C%22type%22:  
%22point%22%2C%22id%22:%22e457c9186c246bf6f09e748f478fc2448a4025a3%22%2C%22tagIds%22:  
%5B%5D%7D%2C%7B%22point%22:%5B69467%2C46084%2C1733%5D%2C%22type%22:%22point%22  
%2C%22id%22:%220bef54e800d5090f74c9927d25ee2ccfa10ab5de%22%2C%22tagIds%22:%5B%5D%7D  
%2C%7B%22point%22:%5B69479%2C46083%2C1731%5D%2C%22type%22:%22point%22%2C%22id%22  
:%22c18084fa72740328adea023fb86d3f9cdd7cfd6f%22%2C%22tagIds%22:%5B%5D%7D%2C%7B%22po  
int%22:%5B69808%2C46104%2C1693%5D%2C%22type%22:%22point%22%2C%22id%22:%22740ac274  
22ec760fa055cac48679700d21db12d3%22%2C%22tagIds%22:%5B%5D%7D%2C%7B%22point%22:%5B6  
9600%2C46087%2C1713%5D%2C%22type%22:%22point%22%2C%22id%22:%22996b698583322d6284b  
956b46ec74ed0ea7c6072%22%2C%22tagIds%22:%5B%5D%7D%2C%7B%22point%22:%5B69055%2C461  
29%2C1817%5D%2C%22type%22:%22point%22%2C%22id%22:%22cdaf4457a79d844c7cb061674914d2  
009c51a050%22%2C%22tagIds%22:%5B%5D%7D%2C%7B%22point%22:%5B68816%2C46004%2C1844%  
5D%2C%22type%22:%22point%22%2C%22id%22:%2235cdbcf9125aa0d20d47af7ff4fee85f7f43219d%22  
%2C%22tagIds%22:%5B%5D%7D%2C%7B%22point%22:%5B68152%2C46026%2C1938%5D%2C%22type  
%22:%22point%22%2C%22id%22:%22f7d65dbbc5cdd69f60ba7dac310f58eee7c25bd3%22%2C%22tagId

s%22:%5B%5D%7D%2C%7B%22point%22:%5B65946%2C45551%2C2086%5D%2C%22type%22:%22point%22%2C%22id%22:%22da8ff496509a7f2a6c4eb2f1eb1b5f37cd3f7f7%22%2C%22tagIds%22:%5B%5D%7D%2C%7B%22point%22:%5B65891%2C45669%2C2103%5D%2C%22type%22:%22point%22%2C%22id%22:%2293c7272d41f5f499e9bbd6eb446069407641cd23%22%2C%22tagIds%22:%5B%5D%7D%2C%7B%22point%22:%5B66231%2C45986%2C2145%5D%2C%22type%22:%22point%22%2C%22id%22:%22cae16d9f98548a7e0b872590a327c778f567b16c%22%2C%22tagIds%22:%5B%5D%7D%2C%7B%22point%22:%5B65866%2C45973%2C2163%5D%2C%22type%22:%22point%22%2C%22id%22:%2243aeb4385821179eaa3dea3397979b84231d1801%22%2C%22tagIds%22:%5B%5D%7D%2C%7B%22point%22:%5B64599%2C47907%2C2176%5D%2C%22type%22:%22point%22%2C%22id%22:%22bc812d314b716a6e14b9f6eb913067e8c9cf9f16%22%2C%22tagIds%22:%5B%5D%7D%2C%7B%22point%22:%5B64608%2C48143%2C2145%5D%2C%22type%22:%22point%22%2C%22id%22:%2203073f1f73af3202c73823f2deb12600d404eab3%22%2C%22tagIds%22:%5B%5D%7D%2C%7B%22point%22:%5B64483%2C48390%2C2134%5D%2C%22type%22:%22point%22%2C%22id%22:%22810ae3957c960e1846c197ed36ef800a517a2a19%22%2C%22tagIds%22:%5B%5D%7D%2C%7B%22point%22:%5B66341%2C45963%2C2125%5D%2C%22type%22:%22point%22%2C%22id%22:%22b5d5788a95bd0769d374a3941a1747d95219366c%22%2C%22tagIds%22:%5B%5D%7D%2C%7B%22point%22:%5B65757%2C45726%2C2129%5D%2C%22type%22:%22point%22%2C%22id%22:%22a577b8ac51496f5a49c3a5280890c33a0704d8cc%22%2C%22tagIds%22:%5B%5D%7D%2C%7B%22point%22:%5B64437%2C48457%2C2128%5D%2C%22type%22:%22point%22%2C%22id%22:%2233015ec7e16f1628ed6f044b56c08c5a510131f7%22%2C%22tagIds%22:%5B%5D%7D%2C%7B%22point%22:%5B64472%2C48435%2C2131%5D%2C%22type%22:%22point%22%2C%22id%22:%22e7d708036c6542a20eb05f83bd7918a75a717be1%22%2C%22tagIds%22:%5B%5D%7D%2C%7B%22point%22:%5B64572%2C48219%2C2143%5D%2C%22type%22:%22point%22%2C%22id%22:%2247992ee9ffe83fdab4c0eeb1aedb4542ab92c05e%22%2C%22tagIds%22:%5B%5D%7D%2C%7B%22point%22:%5B64592%2C48157%2C2149%5D%2C%22type%22:%22point%22%2C%22id%22:%225b9cca606dafd76f60ea8d4fab596ced9c737311%22%2C%22tagIds%22:%5B%5D%7D%2C%7B%22point%22:%5B64103%2C48725%2C2086%5D%2C%22type%22:%22point%22%2C%22id%22:%22ab49cdb38572668cd2486873750f01148c86a79f%22%2C%22tagIds%22:%5B%5D%7D%2C%7B%22point%22:%5B63946%2C48876%2C2076%5D%2C%22type%22:%22point%22%2C%22id%22:%222e01171d2bf89553ef379a56fd623f17f040d165%22%2C%22tagIds%22:%5B%5D%7D%2C%7B%22point%22:%5B63437%2C49125%2C2051%5D%2C%22type%22:%22point%22%2C%22id%22:%22be6994f562e4d920c08d0bfc2ae3a0cfbe1365f5%22%2C%22tagIds%22:%5B%5D%7D%2C%7B%22point%22:%5B63409%2C49158%2C2046%5D%2C%22type%22:%22point%22%2C%22id%22:%22c9163f6dfdd990d7f347672f4c566a0ef56c84f0%22%2C%22tagIds%22:%5B%5D%7D%2C%7B%22point%22:%5B63428%2C49151%2C2047%5D%2C%22type%22:%22point%22%2C%22id%22:%2206bab712b0db28e19bab8bf248b75685b4c463f4%22%2C%22tagIds%22:%5B%5D%7D%2C%7B%22point%22:%5B63302%2C49209%2C2032%5D%2C%22type%22:%22point%22%2C%22id%22:%22bb201d86d3a774ae5d2a4998bb184f3f176411b6%22%2C%22tagIds%22:%5B%5D%7D%2C%7B%22point%22:%5B63180%2C49268%2C2017%5D%2C%22type%22:%22point%22%2C%22id%22:%22f12cc7a9877622a06a1a92f8dc3895c36799da87%22%2C%22tagIds%22:%5B%5D%7D%2C%7B%22point%22:%5B63228%2C49254%2C2022%5D%2C%22type%22:%22point%22%2C%22id%22:%220990755fdc3474b26207b1499849b2c84720a637%22%2C%22tagIds%22:%5B%5D%7D%2C%7B%22point%22:%5B66552%2C45986%2C2105%5D%2C%22type%22:%22point%22%2C%22id%22:%22e0c1bb63c72f18c556a1257d160daeb544cd889f%22%2C%22tagIds%22:%5B%5D%7D%2C%7B%22point%22:%5B65921%2C45587%2C2089%5D%2C%22type%22:%22point%22%2C%22id%22:%229967d6e3256854b6ca133dcccc2314d0c88bf2c8%22%2C%22tagIds%22:%5B%5D%7D%2C%7B%22point%22:%5B65914%2C45585%2C2091%5D%2C%22type%22:%22p

oint%22%2C%22id%22:%22e9642d611e595d086c03744389231200707e5c5d%22%2C%22tagIds%22:%5B%5D%7D%2C%7B%22point%22:%5B65901%2C45689%2C2107%5D%2C%22type%22:%22point%22%2C%22id%22:%226c53ad8b11d224bb67510906a5f1679751020bdd%22%2C%22tagIds%22:%5B%5D%7D%2C%7B%22point%22:%5B65764%2C46065%2C2173%5D%2C%22type%22:%22point%22%2C%22id%22:%223b368365b7723bee702367d0c482bf5034d6ddf7%22%2C%22tagIds%22:%5B%5D%7D%2C%7B%22point%22:%5B66017%2C46003%2C2157%5D%2C%22type%22:%22point%22%2C%22id%22:%22a2b0150e9682b5c9cc4bbc0258adc8049834cc8b%22%2C%22tagIds%22:%5B%5D%7D%2C%7B%22point%22:%5B66354%2C45991%2C2129%5D%2C%22type%22:%22point%22%2C%22id%22:%22e8da36db17f22717e3a86b5fdec323e710e94d77%22%2C%22tagIds%22:%5B%5D%7D%2C%7B%22point%22:%5B65981%2C46012%2C2159%5D%2C%22type%22:%22point%22%2C%22id%22:%22ef3182927e7368744421437b29420d444d2c95f7%22%2C%22tagIds%22:%5B%5D%7D%2C%7B%22point%22:%5B64597%2C48163%2C2147%5D%2C%22type%22:%22point%22%2C%22id%22:%220fc322a1828bf315a3c00e0c0e7c7e715f9d1644%22%2C%22tagIds%22:%5B%5D%7D%2C%7B%22point%22:%5B64577%2C47990%2C2167%5D%2C%22type%22:%22point%22%2C%22id%22:%222bfad9ecfdf527a451375de11f6da719272bcb52%22%2C%22tagIds%22:%5B%5D%7D%2C%7B%22point%22:%5B64559%2C48005%2C2160%5D%2C%22type%22:%22point%22%2C%22id%22:%225a68d905f148fe4d8dff11a72d1589d84e62209%22%2C%22tagIds%22:%5B%5D%7D%2C%7B%22point%22:%5B64583%2C47985%2C2172%5D%2C%22type%22:%22point%22%2C%22id%22:%2259aef8e116943569cff3344b18b8337d660d203%22%2C%22tagIds%22:%5B%5D%7D%2C%7B%22point%22:%5B59244%2C68171%2C868%5D%2C%22type%22:%22point%22%2C%22id%22:%22767c05d8cdcc90b486978dff6cc02b2af3edbae%22%2C%22tagIds%22:%5B%5D%7D%2C%7B%22point%22:%5B54587%2C65596%2C1209%5D%2C%22type%22:%22point%22%2C%22id%22:%22d340094ed0b15fe624a7a092c1d279f83d033d4d%22%2C%22tagIds%22:%5B%5D%7D%2C%7B%22point%22:%5B51145%2C60552%2C1395%5D%2C%22type%22:%22point%22%2C%22id%22:%22b46babcdb2db36cc2a8b2b02cd74c5c0b4d9b664%22%2C%22tagIds%22:%5B%5D%7D%2C%7B%22point%22:%5B50572%2C62261%2C1287%5D%2C%22type%22:%22point%22%2C%22id%22:%2233102c1ea983f2027c81ecd7ac811cc2c9d45887%22%2C%22tagIds%22:%5B%5D%7D%2C%7B%22point%22:%5B54868%2C66094%2C1067%5D%2C%22type%22:%22point%22%2C%22id%22:%22e8321d1fe333cbb0e73436b284f3083c4f704c1e%22%2C%22tagIds%22:%5B%5D%7D%2C%7B%22point%22:%5B54097%2C65219%2C1236%5D%2C%22type%22:%22point%22%2C%22id%22:%22518617a4a24f9d455e24262fa40830bfeb2cd9dd%22%2C%22tagIds%22:%5B%5D%7D%2C%7B%22point%22:%5B53340%2C63277%2C1355%5D%2C%22type%22:%22point%22%2C%22id%22:%2284cf87270e88268783726099887a7151eedca486%22%2C%22tagIds%22:%5B%5D%7D%2C%7B%22point%22:%5B61622%2C49361%2C1788%5D%2C%22type%22:%22point%22%2C%22id%22:%222bb99cf57030df6c792381a3535e4bf4032a337a3%22%2C%22tagIds%22:%5B%5D%7D%2C%7B%22point%22:%5B61631%2C49359%2C1793%5D%2C%22type%22:%22point%22%2C%22id%22:%22b544433b8d189439e412ec444bd084870a64638%22%2C%22tagIds%22:%5B%5D%7D%2C%7B%22point%22:%5B62376%2C49518%2C1864%5D%2C%22type%22:%22point%22%2C%22id%22:%220645e5a0086129b553ca9c9056000414decbbb8a%22%2C%22tagIds%22:%5B%5D%7D%2C%7B%22point%22:%5B61061%2C48862%2C1528%5D%2C%22type%22:%22point%22%2C%22id%22:%220f1b45d919eed94f5c70de5872147849bd7f1f97%22%2C%22tagIds%22:%5B%5D%7D%2C%7B%22point%22:%5B61154%2C48787%2C1450%5D%2C%22type%22:%22point%22%2C%22id%22:%2267333ead72378d61de2abb16fbd40de04ad3b82b%22%2C%22tagIds%22:%5B%5D%7D%2C%7B%22point%22:%5B61785%2C48322%2C1273%5D%2C%22type%22:%22point%22%2C%22id%22:%22f36381f1bc61e18360f9db749c79a420b2c69974%22%2C%22tagIds%22:%5B%5D%7D%2C%7B%22point%22:%5B62712%2C48278%2C1204%5D%2C%22type%22:%22point%22%2C%22id%22:%221ac32ade5621f70832e687256a306be212a03f7d%22%2C%22tagId

s%22:%5B%5D%7D%2C%7B%22point%22:%5B62406%2C48535%2C1021%5D%2C%22type%22:%22point%22%2C%22id%22:%22ba27c88532be6b90dbb2b07a363f27116700e168%22%2C%22tagIds%22:%5B%5D%7D%2C%7B%22point%22:%5B62715%2C47873%2C1019%5D%2C%22type%22:%22point%22%2C%22id%22:%22c02886d833add22e478778bf0de7e7095ce6abd2%22%2C%22tagIds%22:%5B%5D%7D%2C%7B%22point%22:%5B62454%2C48588%2C999%5D%2C%22type%22:%22point%22%2C%22id%22:%229de557a92ba4fe50fa620b3e3c76e33baffb605a%22%2C%22tagIds%22:%5B%5D%7D%2C%7B%22point%22:%5B62661%2C47904%2C999%5D%2C%22type%22:%22point%22%2C%22id%22:%22b098cbc968d496cf9b6c1bd95116f0ac1a997a65%22%2C%22tagIds%22:%5B%5D%7D%2C%7B%22point%22:%5B76753%2C68967%2C702%5D%2C%22type%22:%22point%22%2C%22id%22:%221b3fca2fcd5079ec3e1db472005406f30d9a53a%22%2C%22tagIds%22:%5B%5D%7D%2C%7B%22point%22:%5B76901%2C68656%2C689%5D%2C%22type%22:%22point%22%2C%22id%22:%22990a293561b1e88de59c93e468511258798b78b3%22%2C%22tagIds%22:%5B%5D%7D%2C%7B%22point%22:%5B77054%2C74776%2C706%5D%2C%22type%22:%22point%22%2C%22id%22:%22c18d5bc067add67397a2d700b607ceed22046823%22%2C%22tagIds%22:%5B%5D%7D%2C%7B%22point%22:%5B77057%2C74799%2C711%5D%2C%22type%22:%22point%22%2C%22id%22:%22bd93080ea013acb553ae14d179acb1cec996c3f8%22%2C%22tagIds%22:%5B%5D%7D%2C%7B%22point%22:%5B77163%2C75531%2C756%5D%2C%22type%22:%22point%22%2C%22id%22:%22f4d3d48835903b189877b8e760710820d0bb1b6e%22%2C%22tagIds%22:%5B%5D%7D%2C%7B%22point%22:%5B77228%2C68237%2C663%5D%2C%22type%22:%22point%22%2C%22id%22:%22b07a90aa065fc04f5ca088e23f552b74f0063d05%22%2C%22tagIds%22:%5B%5D%7D%2C%7B%22point%22:%5B77367%2C67955%2C654%5D%2C%22type%22:%22point%22%2C%22id%22:%2272e2d7e1b5b0af7242c617a3c0e0874b7d403126%22%2C%22tagIds%22:%5B%5D%7D%2C%7B%22point%22:%5B78085%2C64390%2C627%5D%2C%22type%22:%22point%22%2C%22id%22:%221ce2d1d64e31f8b92eb297ed6766062fb37faf77%22%2C%22tagIds%22:%5B%5D%7D%2C%7B%22point%22:%5B77440%2C67997%2C597%5D%2C%22type%22:%22point%22%2C%22id%22:%2292715d7cab54022414d7f40d60210f01104b4dae%22%2C%22tagIds%22:%5B%5D%7D%2C%7B%22point%22:%5B77727%2C65153%2C597%5D%2C%22type%22:%22point%22%2C%22id%22:%228c78a3c8cf764958840c0ce68d1828c91b4912fe%22%2C%22tagIds%22:%5B%5D%7D%2C%7B%22point%22:%5B76252%2C64460%2C597%5D%2C%22type%22:%22point%22%2C%22id%22:%22b2bf09a16585344506b754004201291d2960f24c%22%2C%22tagIds%22:%5B%5D%7D%2C%7B%22point%22:%5B79318%2C64060%2C627%5D%2C%22type%22:%22point%22%2C%22id%22:%224ec8a87fdd4e58829be7b579f92aa38e7c21058c%22%2C%22tagIds%22:%5B%5D%7D%2C%7B%22point%22:%5B79345%2C64559%2C622%5D%2C%22type%22:%22point%22%2C%22id%22:%22e2a3f0e60ab9d44dadaeca85a28653ccfe418a59%22%2C%22tagIds%22:%5B%5D%7D%2C%7B%22point%22:%5B77789%2C66868%2C559%5D%2C%22type%22:%22point%22%2C%22id%22:%22c2b27453eef3030529fe5a7045c695207301c075%22%2C%22tagIds%22:%5B%5D%7D%2C%7B%22point%22:%5B76260%2C64561%2C586%5D%2C%22type%22:%22point%22%2C%22id%22:%22941b06f20c6c5d254796182ad4d0ed84ef9fde87%22%2C%22tagIds%22:%5B%5D%7D%2C%7B%22point%22:%5B77723%2C65555%2C615%5D%2C%22type%22:%22point%22%2C%22id%22:%22fb97cd720a9411967635f9241a850d62375b1d5b%22%2C%22tagIds%22:%5B%5D%7D%2C%7B%22point%22:%5B77918%2C64370%2C656%5D%2C%22type%22:%22point%22%2C%22id%22:%22afe9ca7b5380f92650ef9cbdb60863880d7353c5%22%2C%22tagIds%22:%5B%5D%7D%2C%7B%22point%22:%5B76223%2C73815%2C712%5D%2C%22type%22:%22point%22%2C%22id%22:%2211d6754460e19ce4c13661d6d908bda608277767%22%2C%22tagIds%22:%5B%5D%7D%2C%7B%22point%22:%5B77000%2C74605%2C690%5D%2C%22type%22:%22point%22%2C%22id%22:%227fd2f813fcf701d87d1a40fee399bbaf5ba9bcff%22%2C%22tagIds%22:%5B%5D%7D%2C%7B%22point%22:%5B77386%2C68276%2C629%5D%2C%22type%22:%22point%22%2C%22id%

22:%225e4ddbb7ada6265b10d69cca57e0cf6cbcc2fafa%22%2C%22tagIds%22:%5B%5D%7D%2C%7B%22  
point%22:%5B75438%2C73406%2C772%5D%2C%22type%22:%22point%22%2C%22id%22:%2201c8cba  
e5c8262e7c6a6246ff77496e4de16cf19%22%2C%22tagIds%22:%5B%5D%7D%2C%7B%22point%22:%5B  
92926%2C51898%2C1964%5D%2C%22type%22:%22point%22%2C%22id%22:%22ebf5566ca33b434bdd  
8ea0b02421b0e4e5525287%22%2C%22tagIds%22:%5B%5D%7D%2C%7B%22point%22:%5B92971%2C5  
1746%2C1936%5D%2C%22type%22:%22point%22%2C%22id%22:%22d475f72aa8bf8f5097f85b1ac2bd1  
f7dcd136f04%22%2C%22tagIds%22:%5B%5D%7D%2C%7B%22point%22:%5B92936%2C51789%2C1944  
%5D%2C%22type%22:%22point%22%2C%22id%22:%225e0bca050551f2ddeb7df54183aab1c9e0a77c50  
%22%2C%22tagIds%22:%5B%5D%7D%2C%7B%22point%22:%5B93095%2C51565%2C1916%5D%2C%22t  
ype%22:%22point%22%2C%22id%22:%2202e28de497aedc9192cb2e623957257b39ea7a62%22%2C%22  
tagIds%22:%5B%5D%7D%2C%7B%22point%22:%5B93303%2C51258%2C1897%5D%2C%22type%22:%22  
point%22%2C%22id%22:%2206d685dd32dfcd0967697f19b452cc4e26e87b39%22%2C%22tagIds%22:%5  
B%5D%7D%2C%7B%22point%22:%5B93045%2C51676%2C1922%5D%2C%22type%22:%22point%22%2C  
%22id%22:%225d587fa20b1bf8ece7c91e5db85159f1f0d43e32%22%2C%22tagIds%22:%5B%5D%7D%2C  
%7B%22point%22:%5B93287%2C50622%2C1881%5D%2C%22type%22:%22point%22%2C%22id%22:%2  
2522ae285e737cbb8c46240d10f1e88f334f975d4%22%2C%22tagIds%22:%5B%5D%7D%2C%7B%22point  
%22:%5B93372%2C49302%2C1883%5D%2C%22type%22:%22point%22%2C%22id%22:%22b8ebb27791  
c3c2137a476fde685127a04f24be76%22%2C%22tagIds%22:%5B%5D%7D%2C%7B%22point%22:%5B929  
24%2C51889%2C1962%5D%2C%22type%22:%22point%22%2C%22id%22:%2243ad3a4a5651e92d2546d  
3933573c26e6222a2a4%22%2C%22tagIds%22:%5B%5D%7D%2C%7B%22point%22:%5B93076%2C4901  
9%2C1926%5D%2C%22type%22:%22point%22%2C%22id%22:%223e5c24465026a47e7d4fd697b1e940e  
7816276da%22%2C%22tagIds%22:%5B%5D%7D%2C%7B%22point%22:%5B92709%2C49899%2C1928%  
5D%2C%22type%22:%22point%22%2C%22id%22:%225a745bcdd65e5abb1ca0c625e070b72a7bb91f1c%  
22%2C%22tagIds%22:%5B%5D%7D%2C%7B%22point%22:%5B93117%2C49063%2C1921%5D%2C%22ty  
pe%22:%22point%22%2C%22id%22:%22d82204e67dacb4d9a53fe956dbb5414c66268b20%22%2C%22t  
agIds%22:%5B%5D%7D%2C%7B%22point%22:%5B92760%2C49979%2C1921%5D%2C%22type%22:%22  
point%22%2C%22id%22:%229bcffbcd72c62eea3b3dbcd427b43dd6f4170278%22%2C%22tagIds%22:%5  
B%5D%7D%2C%7B%22point%22:%5B92204%2C49432%2C1958%5D%2C%22type%22:%22point%22%2C  
%22id%22:%22378a52e55aa6e76affc457e9e12dd94f9fdc7dbc%22%2C%22tagIds%22:%5B%5D%7D%2C  
%7B%22point%22:%5B92724%2C48814%2C1958%5D%2C%22type%22:%22point%22%2C%22id%22:%2  
2529296fd443aa571602eb163a010cb21652c8206%22%2C%22tagIds%22:%5B%5D%7D%2C%7B%22poin  
t%22:%5B92897%2C48905%2C1946%5D%2C%22type%22:%22point%22%2C%22id%22:%22b4685ad37f  
5c60b7e9fb96664daa697956537256%22%2C%22tagIds%22:%5B%5D%7D%2C%7B%22point%22:%5B92  
461%2C49643%2C1946%5D%2C%22type%22:%22point%22%2C%22id%22:%22708df1a436a5ce7cf643c  
9d6d0205d13d2cf5649%22%2C%22tagIds%22:%5B%5D%7D%2C%7B%22point%22:%5B92782%2C50023  
%2C1917%5D%2C%22type%22:%22point%22%2C%22id%22:%22b777d5e4ea82dce9dafa70d1add48c49  
05eadf66%22%2C%22tagIds%22:%5B%5D%7D%2C%7B%22point%22:%5B92121%2C48534%2C1983%5D  
%2C%22type%22:%22point%22%2C%22id%22:%2238a1591d8597ffee475c68cd5711c3a902016361%22  
%2C%22tagIds%22:%5B%5D%7D%2C%7B%22point%22:%5B92244%2C48579%2C1979%5D%2C%22type  
%22:%22point%22%2C%22id%22:%221d1d79d2fd4888236c30d48956aced51d071f64%22%2C%22tagl  
ds%22:%5B%5D%7D%2C%7B%22point%22:%5B91450%2C49009%2C1974%5D%2C%22type%22:%22poi  
nt%22%2C%22id%22:%22e58c7f66c8b343908a5c47060d6110c3c07cefc1%22%2C%22tagIds%22:%5B%5  
D%7D%2C%7B%22point%22:%5B92841%2C50156%2C1904%5D%2C%22type%22:%22point%22%2C%22  
id%22:%222d23ed542d961322ddf642e99552f89b5da6f45f%22%2C%22tagIds%22:%5B%5D%7D%2C%7

B%22point%22:%5B93076%2C49019%2C1926%5D%2C%22type%22:%22point%22%2C%22id%22:%2266cae71afad4e074aa2424dc978956eb13205a19%22%2C%22tagIds%22:%5B%5D%7D%2C%7B%22point%22:%5B93076%2C49019%2C1926%5D%2C%22type%22:%22point%22%2C%22id%22:%22f13805bdd3dedd95e170ce7470b9310b976f8c86%22%2C%22tagIds%22:%5B%5D%7D%2C%7B%22point%22:%5B93084%2C49026%2C1928%5D%2C%22type%22:%22point%22%2C%22id%22:%22f8dde1bf44ec56422ec66a37c118a70d38fe0595%22%2C%22tagIds%22:%5B%5D%7D%2C%7B%22point%22:%5B95734%2C58451%2C1964%5D%2C%22type%22:%22point%22%2C%22id%22:%22342c075da7507659dea50e75a8688c1307d48dc7%22%2C%22tagIds%22:%5B%5D%7D%2C%7B%22point%22:%5B92946%2C50970%2C1470%5D%2C%22type%22:%22point%22%2C%22id%22:%2263176c2fa021b590efaf51c279816fbc9ef75408%22%2C%22tagIds%22:%5B%5D%7D%2C%7B%22point%22:%5B94433%2C51058%2C1573%5D%2C%22type%22:%22point%22%2C%22id%22:%22e1f7bbf2c0a1bdb2d039129837b0d22db4671b59%22%2C%22tagIds%22:%5B%5D%7D%2C%7B%22point%22:%5B94309%2C51307%2C1440%5D%2C%22type%22:%22point%22%2C%22id%22:%220244389ef11e9f85ef333ca8947dc1c136a2ad7f%22%2C%22tagIds%22:%5B%5D%7D%2C%7B%22point%22:%5B93554%2C53013%2C649%5D%2C%22type%22:%22point%22%2C%22id%22:%22d48a6a8862173d6f2de0ea6b68c1a277ab33ed1e%22%2C%22tagIds%22:%5B%5D%7D%2C%7B%22point%22:%5B91886%2C51436%2C729%5D%2C%22type%22:%22point%22%2C%22id%22:%22f354997724a3b646ef8528078dd5820d8785b040%22%2C%22tagIds%22:%5B%5D%7D%2C%7B%22point%22:%5B93427%2C52522%2C694%5D%2C%22type%22:%22point%22%2C%22id%22:%228528ad1e2977e4558b9b71dfea4625e01c484465%22%2C%22tagIds%22:%5B%5D%7D%2C%7B%22point%22:%5B93431%2C52624%2C685%5D%2C%22type%22:%22point%22%2C%22id%22:%228a1c14d536a8791af8a38c67215f025b25d15940%22%2C%22tagIds%22:%5B%5D%7D%2C%7B%22point%22:%5B91901%2C51355%2C731%5D%2C%22type%22:%22point%22%2C%22id%22:%221ee501229bd53334ed19e47c536204440b2d2442%22%2C%22tagIds%22:%5B%5D%7D%2C%7B%22point%22:%5B93427%2C52328%2C731%5D%2C%22type%22:%22point%22%2C%22id%22:%22f16d61a7ae64c95263324c87ce48bfd60d6ef727%22%2C%22tagIds%22:%5B%5D%7D%2C%7B%22point%22:%5B93832%2C53223%2C623%5D%2C%22type%22:%22point%22%2C%22id%22:%22a39404f244da1aa32f6de4f8820364ba317a3c11%22%2C%22tagIds%22:%5B%5D%7D%2C%7B%22point%22:%5B93940%2C53322%2C612%5D%2C%22type%22:%22point%22%2C%22id%22:%22d04ef5ca9395cca57a8f7bcd2ed7c811bc3a15e3%22%2C%22tagIds%22:%5B%5D%7D%2C%7B%22point%22:%5B92050%2C51892%2C677%5D%2C%22type%22:%22point%22%2C%22id%22:%2286382704eaa0be81f2e8f43b87a3705f96f4492a%22%2C%22tagIds%22:%5B%5D%7D%2C%7B%22point%22:%5B91998%2C51892%2C684%5D%2C%22type%22:%22point%22%2C%22id%22:%22490c8051436e3417bfabe9196dce148ed473152b%22%2C%22tagIds%22:%5B%5D%7D%2C%7B%22point%22:%5B92785%2C53341%2C756%5D%2C%22type%22:%22point%22%2C%22id%22:%22df180ab75c25055df7ba2040d3519d0762576f06%22%2C%22tagIds%22:%5B%5D%7D%2C%7B%22point%22:%5B92068%2C51881%2C674%5D%2C%22type%22:%22point%22%2C%22id%22:%22c9754562b17d616c599d69aba5ce0ad6fa649b2e%22%2C%22tagIds%22:%5B%5D%7D%2C%7B%22point%22:%5B93421%2C52287%2C744%5D%2C%22type%22:%22point%22%2C%22id%22:%225c86d2d6c448a3da87d5be5cfd83e6cc8c660885%22%2C%22tagIds%22:%5B%5D%7D%2C%7B%22point%22:%5B91780%2C53673%2C771%5D%2C%22type%22:%22point%22%2C%22id%22:%22aa3deb72433bb8fe5a0c82cf2daf55f6edcd659c%22%2C%22tagIds%22:%5B%5D%7D%2C%7B%22point%22:%5B91762%2C53709%2C776%5D%2C%22type%22:%22point%22%2C%22id%22:%22c41ae5bb94edf782dc77feda1a10db7e14a750cc%22%2C%22tagIds%22:%5B%5D%7D%2C%7B%22point%22:%5B91917%2C51686%2C700%5D%2C%22type%22:%22point%22%2C%22id%22:%2292fc96ce7d3c53735311ae98b094e7232cfe902a%22%2C%22tagIds%22:%5B%5D%7D%2C%7B%22point%22:%5B93526%2C52830%2C667%5D%2C%22type%22:%22point%22%2C%22id%22:%22638baad9eca5

4255089a1fffed2b7f9fbe60b3f2%22%2C%22tagIds%22:%5B%5D%7D%2C%7B%22point%22:%5B93625%  
2C53075%2C640%5D%2C%22type%22:%22point%22%2C%22id%22:%22a77fcea0b9645b9253208c7bd6  
72a45b8ac53836%22%2C%22tagIds%22:%5B%5D%7D%2C%7B%22point%22:%5B92421%2C52039%2C6  
40%5D%2C%22type%22:%22point%22%2C%22id%22:%226b6d17e98800aa7523866a425fc90299f839aa  
f8%22%2C%22tagIds%22:%5B%5D%7D%2C%7B%22point%22:%5B92575%2C52204%2C622%5D%2C%22  
type%22:%22point%22%2C%22id%22:%227d97e33ecbb98a1a740dacba767c2034e927bda9%22%2C%2  
2tagIds%22:%5B%5D%7D%2C%7B%22point%22:%5B93170%2C51833%2C811%5D%2C%22type%22:%22  
point%22%2C%22id%22:%2223dc0eb7d43cbd801d124e1490e3c31eccb422ad%22%2C%22tagIds%22:%  
5B%5D%7D%2C%7B%22point%22:%5B91539%2C50335%2C806%5D%2C%22type%22:%22point%22%2C  
%22id%22:%22e4c83eb82ef0752c4ce23cdee1b4bb62984b1ef4%22%2C%22tagIds%22:%5B%5D%7D%2  
C%7B%22point%22:%5B91784%2C54258%2C809%5D%2C%22type%22:%22point%22%2C%22id%22:%2  
2ac7b417cb0fb6824304dd81c4f1075afd6375d0b%22%2C%22tagIds%22:%5B%5D%7D%2C%7B%22point  
%22:%5B93059%2C54074%2C439%5D%2C%22type%22:%22point%22%2C%22id%22:%225c189dc10c3d  
5371b7f5b35939917f72a6028bc4%22%2C%22tagIds%22:%5B%5D%7D%2C%7B%22point%22:%5B94354  
%2C54195%2C437%5D%2C%22type%22:%22point%22%2C%22id%22:%22cab09804c39bb4b56b52958a  
c475f534b47927d5%22%2C%22tagIds%22:%5B%5D%7D%2C%7B%22point%22:%5B94274%2C53618%2  
C545%5D%2C%22type%22:%22point%22%2C%22id%22:%22e2b262d585ba5223592033d3599fa1c5f8c1  
42dc%22%2C%22tagIds%22:%5B%5D%7D%2C%7B%22point%22:%5B92967%2C54648%2C357%5D%2C  
%22type%22:%22point%22%2C%22id%22:%226b9881f57812f0b6a9e6ae8ebc3668488530ebdb%22%2C  
%22tagIds%22:%5B%5D%7D%2C%7B%22point%22:%5B94171%2C54599%2C312%5D%2C%22type%22:  
%22point%22%2C%22id%22:%22ec58404003c14695ef7c9d83b3cbb3be3baf8892%22%2C%22tagIds%2  
2:%5B%5D%7D%2C%7B%22point%22:%5B93986%2C56223%2C154%5D%2C%22type%22:%22point%22  
%2C%22id%22:%227d17de6a040c22c87339bbe17f4cd943ace8d8eb%22%2C%22tagIds%22:%5B%5D%7  
D%2C%7B%22point%22:%5B94116%2C54687%2C294%5D%2C%22type%22:%22point%22%2C%22id%2  
2:%2261927995f3c667e8ab572112a7d21c7e126bf32c%22%2C%22tagIds%22:%5B%5D%7D%2C%7B%22  
point%22:%5B93385%2C52230%2C761%5D%2C%22type%22:%22point%22%2C%22id%22:%2275cafce4  
f8575e9150568cbb36e2ae1914cbcd7%22%2C%22tagIds%22:%5B%5D%7D%2C%7B%22point%22:%5B6  
7437%2C45941%2C2013%5D%2C%22type%22:%22point%22%2C%22id%22:%222e53d11a43973983e39  
4e888f138509b9070610d%22%2C%22tagIds%22:%5B%5D%7D%2C%7B%22point%22:%5B93529%2C529  
37%2C655%5D%2C%22type%22:%22point%22%2C%22id%22:%22131d6017c6daa1395ce0bca8c02dfd5  
7688fc216%22%2C%22tagIds%22:%5B%5D%7D%2C%7B%22point%22:%5B93550%2C52853%2C660%5D  
%2C%22type%22:%22point%22%2C%22id%22:%226ffbd4d4561a0028f973deb547faec9e8f009be6%22%  
2C%22tagIds%22:%5B%5D%7D%2C%7B%22point%22:%5B93527%2C52818%2C665%5D%2C%22type%2  
2:%22point%22%2C%22id%22:%223b06941569b5e7d4f86c8fd3798dad3815303b43%22%2C%22tagIds  
%22:%5B%5D%7D%2C%7B%22point%22:%5B93479%2C52746%2C675%5D%2C%22type%22:%22point%  
22%2C%22id%22:%220ea8c8526785473ebc498e742254eb99e0525a0b%22%2C%22tagIds%22:%5B%5D  
%7D%2C%7B%22point%22:%5B93456%2C52686%2C680%5D%2C%22type%22:%22point%22%2C%22id  
%22:%226d9ee2e60476a15ce83cea1cd54b68976dbabbcc%22%2C%22tagIds%22:%5B%5D%7D%2C%7B  
%22point%22:%5B93432%2C52520%2C692%5D%2C%22type%22:%22point%22%2C%22id%22:%228b8a  
7e8b9b300410e87baa3d7f781e5633b85e3b%22%2C%22tagIds%22:%5B%5D%7D%2C%7B%22point%22  
:%5B93433%2C52500%2C697%5D%2C%22type%22:%22point%22%2C%22id%22:%2215fe628dfb08d5a  
2bc5bb251ebb88bada9350c85%22%2C%22tagIds%22:%5B%5D%7D%2C%7B%22point%22:%5B93444%  
2C52442%2C702%5D%2C%22type%22:%22point%22%2C%22id%22:%22aff6dcf6c56ef7824dc3c1be5ee  
1bc73eb6112bc%22%2C%22tagIds%22:%5B%5D%7D%2C%7B%22point%22:%5B93449%2C52405%2C70

7%5D%2C%22type%22:%22point%22%2C%22id%22:%221f98cddef4ddcbe12ed5c5ca7c98704b7d4edf2f  
%22%2C%22tagIds%22:%5B%5D%7D%2C%7B%22point%22:%5B93444%2C52379%2C713%5D%2C%22ty  
pe%22:%22point%22%2C%22id%22:%2274a1ab724a1e14cbf799513849e9a2b2d3302b24%22%2C%22t  
agIds%22:%5B%5D%7D%2C%7B%22point%22:%5B93441%2C52376%2C719%5D%2C%22type%22:%22p  
oint%22%2C%22id%22:%2298b5d51f1b069244c89d099ddc3a8c2127ce4470%22%2C%22tagIds%22:%5B  
%5D%7D%2C%7B%22point%22:%5B93434%2C52354%2C724%5D%2C%22type%22:%22point%22%2C%  
22id%22:%224e62db6e4a4b1fca744e88d910836a2e56e417e1%22%2C%22tagIds%22:%5B%5D%7D%2C  
%7B%22point%22:%5B93428%2C52332%2C729%5D%2C%22type%22:%22point%22%2C%22id%22:%22  
8452f66ee0426ee86ed57d350a88388a60adf67a%22%2C%22tagIds%22:%5B%5D%7D%2C%7B%22point  
%22:%5B93424%2C52321%2C736%5D%2C%22type%22:%22point%22%2C%22id%22:%2231da98b20fe2  
4d2b21259f94eabc2aeabf6ed409%22%2C%22tagIds%22:%5B%5D%7D%2C%7B%22point%22:%5B93419  
%2C52294%2C741%5D%2C%22type%22:%22point%22%2C%22id%22:%22c0dd045ff63941f9dc2bf9f18c  
661fdc3b138a25%22%2C%22tagIds%22:%5B%5D%7D%2C%7B%22point%22:%5B93408%2C52256%2C7  
54%5D%2C%22type%22:%22point%22%2C%22id%22:%2246786e6523fc6e4b59a994d52bcd4c8b0970b  
9f3%22%2C%22tagIds%22:%5B%5D%7D%2C%7B%22point%22:%5B93396%2C52241%2C759%5D%2C%2  
2type%22:%22point%22%2C%22id%22:%2269764dcd209c7043920a234b697b2ddfba7541f3%22%2C%2  
2tagIds%22:%5B%5D%7D%2C%7B%22point%22:%5B93383%2C52150%2C772%5D%2C%22type%22:%22  
point%22%2C%22id%22:%22a4220a3dd9a3bd42f71aee51e6224f535c8f2f9%22%2C%22tagIds%22:%5B  
%5D%7D%2C%7B%22point%22:%5B93356%2C52117%2C780%5D%2C%22type%22:%22point%22%2C%  
22id%22:%22643746fa9a5db531294644d6826f6d10c4d80f76%22%2C%22tagIds%22:%5B%5D%7D%2C  
%7B%22point%22:%5B93325%2C52103%2C786%5D%2C%22type%22:%22point%22%2C%22id%22:%22f  
4bc07f440a0bf852cf9358fd6b5d936d97ae257%22%2C%22tagIds%22:%5B%5D%7D%2C%7B%22point%  
22:%5B93228%2C51985%2C798%5D%2C%22type%22:%22point%22%2C%22id%22:%22d8c83ea659a1d  
0b56b315b7942aa0160c30cf3af%22%2C%22tagIds%22:%5B%5D%7D%2C%7B%22point%22:%5B93187  
%2C51940%2C803%5D%2C%22type%22:%22point%22%2C%22id%22:%22aa8f3cae59d65bb1e5a3fc93c  
5eb1aff50b48f66%22%2C%22tagIds%22:%5B%5D%7D%2C%7B%22point%22:%5B93182%2C51847%2C8  
08%5D%2C%22type%22:%22point%22%2C%22id%22:%22aa9940689254f7eaa4925af77bf22a48c6429d  
3a%22%2C%22tagIds%22:%5B%5D%7D%2C%7B%22point%22:%5B93169%2C51729%2C816%5D%2C%2  
2type%22:%22point%22%2C%22id%22:%229c34d3df133b698e7f744805034d087246e984af%22%2C%2  
2tagIds%22:%5B%5D%7D%2C%7B%22point%22:%5B93117%2C51658%2C821%5D%2C%22type%22:%22  
point%22%2C%22id%22:%2226889a9f745db0374bd4780fef02d41fdafecd1%22%2C%22tagIds%22:%5B  
%5D%7D%2C%7B%22point%22:%5B93071%2C51582%2C829%5D%2C%22type%22:%22point%22%2C%  
22id%22:%2279bb677c82590be7e9f7bfd01b233c9a8781619f%22%2C%22tagIds%22:%5B%5D%7D%2C  
%7B%22point%22:%5B93024%2C51525%2C834%5D%2C%22type%22:%22point%22%2C%22id%22:%22  
42d37dcab317ac1b6130bc7b9be1e2064a57a0ce%22%2C%22tagIds%22:%5B%5D%7D%2C%7B%22point  
%22:%5B92994%2C51492%2C839%5D%2C%22type%22:%22point%22%2C%22id%22:%22d04f73358f38  
a9859fac63167e7219981b1da34c%22%2C%22tagIds%22:%5B%5D%7D%2C%7B%22point%22:%5B9297  
2%2C51434%2C844%5D%2C%22type%22:%22point%22%2C%22id%22:%22af7a0518b44a91e18224d0a  
c71e16e5df57e8830%22%2C%22tagIds%22:%5B%5D%7D%2C%7B%22point%22:%5B92948%2C51404%  
2C848%5D%2C%22type%22:%22point%22%2C%22id%22:%22e0546f8a2b2a53788c93a07204f960c69bc  
3dedb%22%2C%22tagIds%22:%5B%5D%7D%2C%7B%22point%22:%5B92906%2C51369%2C852%5D%2C  
%22type%22:%22point%22%2C%22id%22:%2239cd490e0c3a2e311efd4e1a75621a6723f20021%22%2C  
%22tagIds%22:%5B%5D%7D%2C%7B%22point%22:%5B92853%2C51349%2C858%5D%2C%22type%22:  
%22point%22%2C%22id%22:%22e2e6eb5ce174d1143a9bd153b1851ac482af5b1f%22%2C%22tagIds%2

2:%5B%5D%7D%2C%7B%22point%22:%5B92805%2C51341%2C863%5D%2C%22type%22:%22point%22  
%2C%22id%22:%22c76a2eac9cc2529bfd60eb7ce22a554e6ef090a1%22%2C%22tagIds%22:%5B%5D%7D  
%2C%7B%22point%22:%5B92720%2C51292%2C870%5D%2C%22type%22:%22point%22%2C%22id%22:  
%222d4d8bb34a7081143fa76d89aacf99c516e17292%22%2C%22tagIds%22:%5B%5D%7D%2C%7B%22p  
oint%22:%5B92615%2C51249%2C877%5D%2C%22type%22:%22point%22%2C%22id%22:%2290db6748  
143a40312a53bc7a70180578154dc1e1%22%2C%22tagIds%22:%5B%5D%7D%2C%7B%22point%22:%5B  
92255%2C51095%2C892%5D%2C%22type%22:%22point%22%2C%22id%22:%22dbee5b3833c8f148915  
5959d804d90dbdeae0d82%22%2C%22tagIds%22:%5B%5D%7D%2C%7B%22point%22:%5B92233%2C51  
073%2C897%5D%2C%22type%22:%22point%22%2C%22id%22:%2272fc59e487efe4a7b1aaa79d9a6829  
2eaa4553d6%22%2C%22tagIds%22:%5B%5D%7D%2C%7B%22point%22:%5B92198%2C51078%2C906%  
5D%2C%22type%22:%22point%22%2C%22id%22:%22f00119661ca04c9e1e6664fff55895fbd26cb4a5%2  
2%2C%22tagIds%22:%5B%5D%7D%2C%7B%22point%22:%5B92251%2C51098%2C912%5D%2C%22type  
%22:%22point%22%2C%22id%22:%2252057393867ef469e77ddfae224873888057048b%22%2C%22tagl  
ds%22:%5B%5D%7D%2C%7B%22point%22:%5B92250%2C51122%2C923%5D%2C%22type%22:%22poin  
t%22%2C%22id%22:%22214e0727a3928cb153090e7673c08dccb3636dc4%22%2C%22tagIds%22:%5B%5  
D%7D%2C%7B%22point%22:%5B92208%2C51108%2C928%5D%2C%22type%22:%22point%22%2C%22i  
d%22:%2233eac8562dd45479af0ddcfe75674098499cc4a0%22%2C%22tagIds%22:%5B%5D%7D%2C%7B  
%22point%22:%5B92059%2C51029%2C933%5D%2C%22type%22:%22point%22%2C%22id%22:%22d392  
b8be12f382dc67b8c42e5f115a44d041a01a%22%2C%22tagIds%22:%5B%5D%7D%2C%7B%22point%22:  
%5B92160%2C51107%2C943%5D%2C%22type%22:%22point%22%2C%22id%22:%22fbe2064f1817b304  
8dab0a53fafbfb840a967b49%22%2C%22tagIds%22:%5B%5D%7D%2C%7B%22point%22:%5B92154%2C  
51119%2C948%5D%2C%22type%22:%22point%22%2C%22id%22:%2286d9fd23c530385bce26294550e5  
d5c6f670cbeb%22%2C%22tagIds%22:%5B%5D%7D%2C%7B%22point%22:%5B92127%2C51126%2C953  
%5D%2C%22type%22:%22point%22%2C%22id%22:%22b0accba43d01f798c283c038e40d04434bde0bcd  
%22%2C%22tagIds%22:%5B%5D%7D%2C%7B%22point%22:%5B92136%2C51149%2C959%5D%2C%22ty  
pe%22:%22point%22%2C%22id%22:%225005dc0b5c825df63b4a801274bdc05f8faf266c%22%2C%22tagl  
ds%22:%5B%5D%7D%2C%7B%22point%22:%5B92127%2C51156%2C964%5D%2C%22type%22:%22poin  
t%22%2C%22id%22:%22a0dfce936213844dd64bdb3c95a00e9735823d9%22%2C%22tagIds%22:%5B%  
5D%7D%2C%7B%22point%22:%5B92086%2C51140%2C970%5D%2C%22type%22:%22point%22%2C%22  
id%22:%2231b551746dfc8c730d0a1903a93990b5421c1879%22%2C%22tagIds%22:%5B%5D%7D%2C%7  
B%22point%22:%5B92030%2C51115%2C978%5D%2C%22type%22:%22point%22%2C%22id%22:%22adf  
2808bce4a8b1a6f97a57dc4164f6759f22b53%22%2C%22tagIds%22:%5B%5D%7D%2C%7B%22point%22:  
%5B92036%2C51110%2C984%5D%2C%22type%22:%22point%22%2C%22id%22:%2228e08c1553aaec6e  
5fc435a8b0e6f54dd9043a82%22%2C%22tagIds%22:%5B%5D%7D%2C%7B%22point%22:%5B92022%2C  
51101%2C989%5D%2C%22type%22:%22point%22%2C%22id%22:%22a6ba2c8a54b83e9a6cfe235e8183  
9ca80b63c7ff%22%2C%22tagIds%22:%5B%5D%7D%2C%7B%22point%22:%5B92047%2C51110%2C997  
%5D%2C%22type%22:%22point%22%2C%22id%22:%220205486c690e30ba53f5e81040313d359f070cab  
%22%2C%22tagIds%22:%5B%5D%7D%2C%7B%22point%22:%5B92029%2C51114%2C1007%5D%2C%22t  
ype%22:%22point%22%2C%22id%22:%2289357b8c67e332616551ec74cdc2961d8781cc29%22%2C%22t  
agIds%22:%5B%5D%7D%2C%7B%22point%22:%5B92397%2C50175%2C1007%5D%2C%22type%22:%22  
point%22%2C%22id%22:%22e42dc08197a3b3315b9fd0f13517b6930485a972%22%2C%22tagIds%22:%5  
B%5D%7D%2C%7B%22point%22:%5B92387%2C50225%2C1012%5D%2C%22type%22:%22point%22%2C  
%22id%22:%22954ed12067a46e7260bd4152b1b43856f92d742d%22%2C%22tagIds%22:%5B%5D%7D%  
2C%7B%22point%22:%5B92068%2C51137%2C1012%5D%2C%22type%22:%22point%22%2C%22id%22:

%22f793283eff7465b49916461c200db16947eb816a%22%2C%22tagIds%22:%5B%5D%7D%2C%7B%22point%22:%5B92068%2C51157%2C1017%5D%2C%22type%22:%22point%22%2C%22id%22:%2255af73d137ef16b9380c199f679f08e31f29ce73%22%2C%22tagIds%22:%5B%5D%7D%2C%7B%22point%22:%5B92375%2C50252%2C1017%5D%2C%22type%22:%22point%22%2C%22id%22:%2203528bd98bd41616d2fb8039cd9dd62ee76d5f4d%22%2C%22tagIds%22:%5B%5D%7D%2C%7B%22point%22:%5B92329%2C50291%2C1022%5D%2C%22type%22:%22point%22%2C%22id%22:%22cc8f7fa95f61f29477399769f8c24879e35e390c%22%2C%22tagIds%22:%5B%5D%7D%2C%7B%22point%22:%5B92094%2C51193%2C1022%5D%2C%22type%22:%22point%22%2C%22id%22:%222fc713d0e6c51308bb346dd6591d91c4b2b0d89a%22%2C%22tagIds%22:%5B%5D%7D%2C%7B%22point%22:%5B92334%2C50320%2C1027%5D%2C%22type%22:%22point%22%2C%22id%22:%225d174a8638ee87bd016cf9bd92406f784b21097f%22%2C%22tagIds%22:%5B%5D%7D%2C%7B%22point%22:%5B92138%2C51232%2C1027%5D%2C%22type%22:%22point%22%2C%22id%22:%222e4984afc450d6cd1491562b00eaa8847322e704%22%2C%22tagIds%22:%5B%5D%7D%2C%7B%22point%22:%5B92290%2C50366%2C1032%5D%2C%22type%22:%22point%22%2C%22id%22:%222334098626533ee215f756d4b506d7cf010da05b4%22%2C%22tagIds%22:%5B%5D%7D%2C%7B%22point%22:%5B92169%2C51263%2C1032%5D%2C%22type%22:%22point%22%2C%22id%22:%22282ce448414019e2902682f26d25b9ae7f155f098%22%2C%22tagIds%22:%5B%5D%7D%2C%7B%22point%22:%5B92314%2C50400%2C1038%5D%2C%22type%22:%22point%22%2C%22id%22:%22049d5229a906da845a013b97202173d8c72a6f05%22%2C%22tagIds%22:%5B%5D%7D%2C%7B%22point%22:%5B92179%2C51278%2C1038%5D%2C%22type%22:%22point%22%2C%22id%22:%222b6c18604577d1da269c96fe283dbe256e088a7c7%22%2C%22tagIds%22:%5B%5D%7D%2C%7B%22point%22:%5B92312%2C50414%2C1043%5D%2C%22type%22:%22point%22%2C%22id%22:%222da3606f90285dc93d83cdf1d3156337fc47fbc6b%22%2C%22tagIds%22:%5B%5D%7D%2C%7B%22point%22:%5B92169%2C51292%2C1043%5D%2C%22type%22:%22point%22%2C%22id%22:%2225250da607a898209c3485defe3b77b72b41918bc%22%2C%22tagIds%22:%5B%5D%7D%2C%7B%22point%22:%5B92317%2C50438%2C1047%5D%2C%22type%22:%22point%22%2C%22id%22:%2251b2169c262140931dbe07f67b1f0e3e4dc6987c%22%2C%22tagIds%22:%5B%5D%7D%2C%7B%22point%22:%5B92152%2C51295%2C1047%5D%2C%22type%22:%22point%22%2C%22id%22:%2226e9c57703d1ee2ad99ce223273cc4a6c0eccf48b%22%2C%22tagIds%22:%5B%5D%7D%2C%7B%22point%22:%5B92322%2C50455%2C1052%5D%2C%22type%22:%22point%22%2C%22id%22:%2226da364c5b04b507cf49f291ad0bdb17829c7738%22%2C%22tagIds%22:%5B%5D%7D%2C%7B%22point%22:%5B92164%2C51319%2C1052%5D%2C%22type%22:%22point%22%2C%22id%22:%222ee76fa07216b7f8be5671181a9b146d0c6e2ca4%22%2C%22tagIds%22:%5B%5D%7D%2C%7B%22point%22:%5B92319%2C50465%2C1057%5D%2C%22type%22:%22point%22%2C%22id%22:%227732d5b4de3142e59797c04856e57394d41dbb45%22%2C%22tagIds%22:%5B%5D%7D%2C%7B%22point%22:%5B92205%2C51355%2C1057%5D%2C%22type%22:%22point%22%2C%22id%22:%222a57c31401ab5a8fad78b60818b2ad3afd66b5d46%22%2C%22tagIds%22:%5B%5D%7D%2C%7B%22point%22:%5B92307%2C50482%2C1062%5D%2C%22type%22:%22point%22%2C%22id%22:%22ca2c67976ddcc5fe050bc0164460859ba6ece543%22%2C%22tagIds%22:%5B%5D%7D%2C%7B%22point%22:%5B92227%2C51374%2C1062%5D%2C%22type%22:%22point%22%2C%22id%22:%22c4e3452aa03c98319752d5c1bdb647379f093f9a%22%2C%22tagIds%22:%5B%5D%7D%2C%7B%22point%22:%5B92332%2C50483%2C1067%5D%2C%22type%22:%22point%22%2C%22id%22:%22dc3c0bdf48d721b280c21f1a507d9018092aab30%22%2C%22tagIds%22:%5B%5D%7D%2C%7B%22point%22:%5B92238%2C51388%2C1067%5D%2C%22type%22:%22point%22%2C%22id%22:%222a151ba839cb6fca3ba81a1eaf93e7fe21f00e92%22%2C%22tagIds%22:%5B%5D%7D%2C%7B%22point%22:%5B92335%2C50497%2C1072%5D%2C%22type%22:%22point%22%2C%22id%22:%2247c82af64c4203f3b4c22895b29ce75bec407df9%22%2C%22tagIds%22:%5B%5D%7D%2C%7B

%22point%22:%5B92260%2C51409%2C1072%5D%2C%22type%22:%22point%22%2C%22id%22:%225e8d70c3bd3a0a02bd5696fbaedd62adc260c405%22%2C%22tagIds%22:%5B%5D%7D%2C%7B%22point%22:%5B92018%2C51184%2C1077%5D%2C%22type%22:%22point%22%2C%22id%22:%2253634252d0a46fecc81c9928845c143c6371ead7%22%2C%22tagIds%22:%5B%5D%7D%2C%7B%22point%22:%5B92378%2C50519%2C1082%5D%2C%22type%22:%22point%22%2C%22id%22:%223d0c76012ada11c1c7b31925938ce847adf77d4d%22%2C%22tagIds%22:%5B%5D%7D%2C%7B%22point%22:%5B92374%2C51487%2C1082%5D%2C%22type%22:%22point%22%2C%22id%22:%22ac45453ae73b4e8abf230451c2f00c493eed7f02%22%2C%22tagIds%22:%5B%5D%7D%2C%7B%22point%22:%5B92398%2C50539%2C1087%5D%2C%22type%22:%22point%22%2C%22id%22:%2277dc4217ef0ff99ef5e587195a6f8f888d65201a%22%2C%22tagIds%22:%5B%5D%7D%2C%7B%22point%22:%5B92441%2C51518%2C1087%5D%2C%22type%22:%22point%22%2C%22id%22:%228999f4730abf72fe37df4de17102e1e681ec6830%22%2C%22tagIds%22:%5B%5D%7D%2C%7B%22point%22:%5B92418%2C50551%2C1092%5D%2C%22type%22:%22point%22%2C%22id%22:%225c0b6e33e40da3ff3be96ca91ddb9aa801269e6b%22%2C%22tagIds%22:%5B%5D%7D%2C%7B%22point%22:%5B92464%2C51536%2C1092%5D%2C%22type%22:%22point%22%2C%22id%22:%22da3bb0f48b1c8f152d7dff587bd6d13081a1c160%22%2C%22tagIds%22:%5B%5D%7D%2C%7B%22point%22:%5B92555%2C51564%2C1097%5D%2C%22type%22:%22point%22%2C%22id%22:%221a7bcde1ff48956eca1c0a43a6dcb2c6c2683e7a%22%2C%22tagIds%22:%5B%5D%7D%2C%7B%22point%22:%5B92424%2C50572%2C1097%5D%2C%22type%22:%22point%22%2C%22id%22:%229dc0d6b0cadebb41d1bd468ef3561d717da90835%22%2C%22tagIds%22:%5B%5D%7D%2C%7B%22point%22:%5B92451%2C50579%2C1102%5D%2C%22type%22:%22point%22%2C%22id%22:%22f894eaf35a13d4a882d801eed207fac8f1edbd9b%22%2C%22tagIds%22:%5B%5D%7D%2C%7B%22point%22:%5B92691%2C51610%2C1102%5D%2C%22type%22:%22point%22%2C%22id%22:%2246456b3debc33edab0a52c26115a86467015c885%22%2C%22tagIds%22:%5B%5D%7D%2C%7B%22point%22:%5B92454%2C50586%2C1107%5D%2C%22type%22:%22point%22%2C%22id%22:%22b28b342f03f3eb96f444dede8e1b471816f370fb%22%2C%22tagIds%22:%5B%5D%7D%2C%7B%22point%22:%5B92739%2C51631%2C1107%5D%2C%22type%22:%22point%22%2C%22id%22:%22f3398e847b0f6d32a362f33c2c1d7f35fbaf0a34%22%2C%22tagIds%22:%5B%5D%7D%2C%7B%22point%22:%5B92461%2C50591%2C1112%5D%2C%22type%22:%22point%22%2C%22id%22:%220ac17a35fbb8eb3e4b155c5dcf08433b02bf7e92%22%2C%22tagIds%22:%5B%5D%7D%2C%7B%22point%22:%5B92833%2C51643%2C1112%5D%2C%22type%22:%22point%22%2C%22id%22:%227cf7082ad99c383844e3e524dbf15a6c7ef33ab5%22%2C%22tagIds%22:%5B%5D%7D%2C%7B%22point%22:%5B92466%2C50601%2C1117%5D%2C%22type%22:%22point%22%2C%22id%22:%221ebe11e45dd7d937aea7d28703b3dd63863478e0%22%2C%22tagIds%22:%5B%5D%7D%2C%7B%22point%22:%5B92891%2C51651%2C1117%5D%2C%22type%22:%22point%22%2C%22id%22:%228e8846c778b0b59022be0ec3bafd1ebf705506df%22%2C%22tagIds%22:%5B%5D%7D%2C%7B%22point%22:%5B92468%2C50599%2C1122%5D%2C%22type%22:%22point%22%2C%22id%22:%22ce1024686f6f8dca893d6e916163fb459c9f263e%22%2C%22tagIds%22:%5B%5D%7D%2C%7B%22point%22:%5B92966%2C51653%2C1122%5D%2C%22type%22:%22point%22%2C%22id%22:%22ba991d01aa851317f191a2d655da4299acd1e2cb%22%2C%22tagIds%22:%5B%5D%7D%2C%7B%22point%22:%5B92480%2C50608%2C1127%5D%2C%22type%22:%22point%22%2C%22id%22:%22e4f1b23ed707372adde6f364fb497c6a9fd46ee1%22%2C%22tagIds%22:%5B%5D%7D%2C%7B%22point%22:%5B93000%2C51673%2C1127%5D%2C%22type%22:%22point%22%2C%22id%22:%22deace7fc3562fa0e95adc6a25456c8f6100d0def%22%2C%22tagIds%22:%5B%5D%7D%2C%7B%22point%22:%5B92495%2C50613%2C1132%5D%2C%22type%22:%22point%22%2C%22id%22:%225982c81f6b654571625c57683dad101ac7dc0f05%22%2C%22tagIds%22:%5B%5D%7D%2C%7B%22point%22:%5B93082%2C51665%2C1132%5D%2C%22type%22:%22point%22%2C%22id%22:%225ff

87eaa8f08ba49f5f0df1f2e64681d9e2b85d%22%2C%22tagIds%22:%5B%5D%7D%2C%7B%22point%22:  
%5B92064%2C51266%2C1132%5D%2C%22type%22:%22point%22%2C%22id%22:%22ea04380c376f42  
103caa1552bef764602147cf4%22%2C%22tagIds%22:%5B%5D%7D%2C%7B%22point%22:%5B92483%2  
C50627%2C1137%5D%2C%22type%22:%22point%22%2C%22id%22:%22e1efd1027b71f780724173b116  
dc26c4c7a73cc8%22%2C%22tagIds%22:%5B%5D%7D%2C%7B%22point%22:%5B93144%2C51669%2C11  
37%5D%2C%22type%22:%22point%22%2C%22id%22:%22ab4759388005b11f089b3d600b478254f83ba  
ddb%22%2C%22tagIds%22:%5B%5D%7D%2C%7B%22point%22:%5B92493%2C50633%2C1141%5D%2C  
%22type%22:%22point%22%2C%22id%22:%22bcc2f323952e19f82346f386f5ad2dec7b035de4%22%2C  
%22tagIds%22:%5B%5D%7D%2C%7B%22point%22:%5B93173%2C51678%2C1141%5D%2C%22type%22:  
%22point%22%2C%22id%22:%2288fc02b8350c5f5cba938bbbb8cddb3ddb10c16e%22%2C%22tagIds%2  
2:%5B%5D%7D%2C%7B%22point%22:%5B92510%2C50638%2C1146%5D%2C%22type%22:%22point%2  
2%2C%22id%22:%22d2f9e5537ce4f172df9a0ce3aa6f5cd8252d63f7%22%2C%22tagIds%22:%5B%5D%7  
D%2C%7B%22point%22:%5B92119%2C51328%2C1146%5D%2C%22type%22:%22point%22%2C%22id%  
22:%22c165d5ecf06a978197c161cac3ff138472440753%22%2C%22tagIds%22:%5B%5D%7D%2C%7B%2  
2point%22:%5B93243%2C51662%2C1146%5D%2C%22type%22:%22point%22%2C%22id%22:%226a2d1  
e7549b1d4f81e887c41a804766084f34b3b%22%2C%22tagIds%22:%5B%5D%7D%2C%7B%22point%22:%  
5B92556%2C50640%2C1151%5D%2C%22type%22:%22point%22%2C%22id%22:%225f15cc5217765d56  
d3d978e9eba7045a0e44b82c%22%2C%22tagIds%22:%5B%5D%7D%2C%7B%22point%22:%5B92581%2  
C50650%2C1156%5D%2C%22type%22:%22point%22%2C%22id%22:%2252e7292f252003bd982ebfc9ffb  
18b9f3ce413b4%22%2C%22tagIds%22:%5B%5D%7D%2C%7B%22point%22:%5B93232%2C51693%2C11  
57%5D%2C%22type%22:%22point%22%2C%22id%22:%22dacf42fdcd33eb27531e0c8f4ffce84a1a517cfa  
%22%2C%22tagIds%22:%5B%5D%7D%2C%7B%22point%22:%5B92149%2C51369%2C1157%5D%2C%22t  
ype%22:%22point%22%2C%22id%22:%22a0f9513bc791289e02502f2df5a29b44691ceefb%22%2C%22ta  
glds%22:%5B%5D%7D%2C%7B%22point%22:%5B92571%2C50658%2C1162%5D%2C%22type%22:%22p  
oint%22%2C%22id%22:%22a573fc30f1190701daa70cb9da95ef431202fca8%22%2C%22tagIds%22:%5B  
%5D%7D%2C%7B%22point%22:%5B92171%2C51394%2C1162%5D%2C%22type%22:%22point%22%2C  
%22id%22:%227763ff406a197b12f4ce99030febdfba0ec5af41%22%2C%22tagIds%22:%5B%5D%7D%2C  
%7B%22point%22:%5B93242%2C51700%2C1162%5D%2C%22type%22:%22point%22%2C%22id%22:%2  
205bfea6d8280bfbcd840955be6d2b3b49456db73%22%2C%22tagIds%22:%5B%5D%7D%2C%7B%22poi  
nt%22:%5B92561%2C50658%2C1167%5D%2C%22type%22:%22point%22%2C%22id%22:%22222147aca  
3f8dc68473dffbf23d5fee3d561d7a6%22%2C%22tagIds%22:%5B%5D%7D%2C%7B%22point%22:%5B921  
87%2C51399%2C1167%5D%2C%22type%22:%22point%22%2C%22id%22:%22d4fcbcc49a6832c839b836  
1c4a7e8dfc51e790be%22%2C%22tagIds%22:%5B%5D%7D%2C%7B%22point%22:%5B93292%2C51680%  
2C1167%5D%2C%22type%22:%22point%22%2C%22id%22:%22bccb06804fcfb658a4df3a826f34e49fcf79  
04d8%22%2C%22tagIds%22:%5B%5D%7D%2C%7B%22point%22:%5B92604%2C50640%2C1172%5D%2C  
%22type%22:%22point%22%2C%22id%22:%22fe61997f4a7fdda244bd7fd021d803fb153a6ed0%22%2C  
%22tagIds%22:%5B%5D%7D%2C%7B%22point%22:%5B92194%2C51409%2C1172%5D%2C%22type%22:  
%22point%22%2C%22id%22:%227e6476da794f2bbc90ee993306ca19b6a0339059%22%2C%22tagIds%2  
2:%5B%5D%7D%2C%7B%22point%22:%5B93318%2C51682%2C1172%5D%2C%22type%22:%22point%2  
2%2C%22id%22:%2267790840bae7bed5b2bfbef383fe17638db1a4e7%22%2C%22tagIds%22:%5B%5D%  
7D%2C%7B%22point%22:%5B92579%2C50645%2C1177%5D%2C%22type%22:%22point%22%2C%22id  
%22:%22543c47eb183115843d02d3299bd50feafc9215e8%22%2C%22tagIds%22:%5B%5D%7D%2C%7B  
%22point%22:%5B92209%2C51427%2C1177%5D%2C%22type%22:%22point%22%2C%22id%22:%22930  
55d46c1a5c0fb2357ea4c1839631aad4fcee8%22%2C%22tagIds%22:%5B%5D%7D%2C%7B%22point%22:

%5B93328%2C51690%2C1177%5D%2C%22type%22:%22point%22%2C%22id%22:%22ec06abd09bae2559538e027485b77037f207102d%22%2C%22tagIds%22:%5B%5D%7D%2C%7B%22point%22:%5B92589%2C50642%2C1182%5D%2C%22type%22:%22point%22%2C%22id%22:%221673bd50855e4b2e67f44b0b6aad682f1d77f92e%22%2C%22tagIds%22:%5B%5D%7D%2C%7B%22point%22:%5B92212%2C51412%2C1182%5D%2C%22type%22:%22point%22%2C%22id%22:%225edddec674bb9266d78973f6a4498611af530f80%22%2C%22tagIds%22:%5B%5D%7D%2C%7B%22point%22:%5B93353%2C51682%2C1182%5D%2C%22type%22:%22point%22%2C%22id%22:%22ecd0da6e2bd1c8ec5400fb708ddee73222b18a86%22%2C%22tagIds%22:%5B%5D%7D%2C%7B%22point%22:%5B92628%2C50635%2C1187%5D%2C%22type%22:%22point%22%2C%22id%22:%22b4aaec8b46101d19eded661d0e3b639fe8f9281b%22%2C%22tagIds%22:%5B%5D%7D%2C%7B%22point%22:%5B92221%2C51424%2C1187%5D%2C%22type%22:%22point%22%2C%22id%22:%22cd74daf6ca035e5897fd0dc18cafccf515bab440%22%2C%22tagIds%22:%5B%5D%7D%2C%7B%22point%22:%5B93385%2C51685%2C1187%5D%2C%22type%22:%22point%22%2C%22id%22:%22d91dcff96ddd5ca3c6a2c2f85a69ebf70c314e9c%22%2C%22tagIds%22:%5B%5D%7D%2C%7B%22point%22:%5B92661%2C50640%2C1192%5D%2C%22type%22:%22point%22%2C%22id%22:%226e15868e1713c43389b5c4f42d9006af672e5456%22%2C%22tagIds%22:%5B%5D%7D%2C%7B%22point%22:%5B92231%2C51429%2C1192%5D%2C%22type%22:%22point%22%2C%22id%22:%22ead98b123e725f39a1cdd6c2c4359b97532d4331%22%2C%22tagIds%22:%5B%5D%7D%2C%7B%22point%22:%5B93423%2C51674%2C1192%5D%2C%22type%22:%22point%22%2C%22id%22:%22df98d1d8d05fd870522b923ef950c745ad872743%22%2C%22tagIds%22:%5B%5D%7D%2C%7B%22point%22:%5B92694%2C50648%2C1197%5D%2C%22type%22:%22point%22%2C%22id%22:%22106d6f7bd029c1836fc069694eaff7727181ea84%22%2C%22tagIds%22:%5B%5D%7D%2C%7B%22point%22:%5B92239%2C51425%2C1197%5D%2C%22type%22:%22point%22%2C%22id%22:%2287d7faafa20a8e7a18e3aef396ab377411f09db6%22%2C%22tagIds%22:%5B%5D%7D%2C%7B%22point%22:%5B93443%2C51663%2C1197%5D%2C%22type%22:%22point%22%2C%22id%22:%22f5421247cceec8c6b67dc1e8ab4817447ebb0296%22%2C%22tagIds%22:%5B%5D%7D%2C%7B%22point%22:%5B92244%2C51419%2C1201%5D%2C%22type%22:%22point%22%2C%22id%22:%2257c652163540c350b68bbf0488adbcb2a51ad73%22%2C%22tagIds%22:%5B%5D%7D%2C%7B%22point%22:%5B93471%2C51655%2C1201%5D%2C%22type%22:%22point%22%2C%22id%22:%226f79b195e3c6fb81d383f71dfb5d60111c3ed8f0%22%2C%22tagIds%22:%5B%5D%7D%2C%7B%22point%22:%5B92709%2C50660%2C1202%5D%2C%22type%22:%22point%22%2C%22id%22:%2248c88a91c51e87f9d8fce3da27ab1d196a5fc732%22%2C%22tagIds%22:%5B%5D%7D%2C%7B%22point%22:%5B92729%2C50658%2C1207%5D%2C%22type%22:%22point%22%2C%22id%22:%22df26c05c97a160deccdb4c3526797ad2aec36d0%22%2C%22tagIds%22:%5B%5D%7D%2C%7B%22point%22:%5B92261%2C51447%2C1207%5D%2C%22type%22:%22point%22%2C%22id%22:%22e62a6eb57553d7bf1c5758e77489e04ca7b41748%22%2C%22tagIds%22:%5B%5D%7D%2C%7B%22point%22:%5B93481%2C51662%2C1207%5D%2C%22type%22:%22point%22%2C%22id%22:%2291f4fcdab92b581238f5083494ae31edf393d36f%22%2C%22tagIds%22:%5B%5D%7D%2C%7B%22point%22:%5B92729%2C50655%2C1212%5D%2C%22type%22:%22point%22%2C%22id%22:%22d4fd79a9a4433ffec29f67baf8b9ac05c7e5a576%22%2C%22tagIds%22:%5B%5D%7D%2C%7B%22point%22:%5B92274%2C51427%2C1212%5D%2C%22type%22:%22point%22%2C%22id%22:%2218c5ce532c0d99c303183f65f4be77f1c4dafb4d%22%2C%22tagIds%22:%5B%5D%7D%2C%7B%22point%22:%5B93504%2C51657%2C1212%5D%2C%22type%22:%22point%22%2C%22id%22:%22966305eb87b8f9940ef1ffc28533475c382e0c68%22%2C%22tagIds%22:%5B%5D%7D%2C%7B%22point%22:%5B92760%2C50660%2C1217%5D%2C%22type%22:%22point%22%2C%22id%22:%22ec178fa5f0f72786f636b8b0c99d7238850d47b8%22%2C%22tagIds%22:%5B%5D%7D%2C%7B%22point%22:%5B92277%2C51422%2C1217%5D%2C%22type%22:%22point%22%2C%22id%22:%22006e34cf59d501f

03aa90f072e94168ac8b66005%22%2C%22tagIds%22:%5B%5D%7D%2C%7B%22point%22:%5B93544%2C51644%2C1217%5D%2C%22type%22:%22point%22%2C%22id%22:%2201ac88d2ad24010675fbf24b17e0ae1a04e7871c%22%2C%22tagIds%22:%5B%5D%7D%2C%7B%22point%22:%5B92735%2C50673%2C1222%5D%2C%22type%22:%22point%22%2C%22id%22:%221d19ef444de4342d822edf334cee3189f7d03711%22%2C%22tagIds%22:%5B%5D%7D%2C%7B%22point%22:%5B92279%2C51394%2C1222%5D%2C%22type%22:%22point%22%2C%22id%22:%22a55992c6ff9add91858830fd1ba64e12f55e2141%22%2C%22tagIds%22:%5B%5D%7D%2C%7B%22point%22:%5B93606%2C51610%2C1222%5D%2C%22type%22:%22point%22%2C%22id%22:%22a52b1a15aa86cdf669f81ab14b896a1a16c96550%22%2C%22tagIds%22:%5B%5D%7D%2C%7B%22point%22:%5B92756%2C50665%2C1227%5D%2C%22type%22:%22point%22%2C%22id%22:%22c7196ead038af31e02f2fb8e52cd5552c359829e%22%2C%22tagIds%22:%5B%5D%7D%2C%7B%22point%22:%5B92285%2C51378%2C1227%5D%2C%22type%22:%22point%22%2C%22id%22:%2298689e7fa0a0f2cbbdbc0c586cbe8264a705a9d1%22%2C%22tagIds%22:%5B%5D%7D%2C%7B%22point%22:%5B93657%2C51580%2C1227%5D%2C%22type%22:%22point%22%2C%22id%22:%22312e95fde7793a18b21214203907ab3424756f1a%22%2C%22tagIds%22:%5B%5D%7D%2C%7B%22point%22:%5B92764%2C50671%2C1232%5D%2C%22type%22:%22point%22%2C%22id%22:%222443df5ae0429f01ba9c9bf22c4c2cc980201b4a%22%2C%22tagIds%22:%5B%5D%7D%2C%7B%22point%22:%5B92288%2C51362%2C1232%5D%2C%22type%22:%22point%22%2C%22id%22:%2209b28c0ecea2b62885909a65f51a053c02dad63%22%2C%22tagIds%22:%5B%5D%7D%2C%7B%22point%22:%5B93698%2C51561%2C1232%5D%2C%22type%22:%22point%22%2C%22id%22:%22cf1417e02efaf6a53ebf56b21d432aaafa82f91f%22%2C%22tagIds%22:%5B%5D%7D%2C%7B%22point%22:%5B92749%2C50677%2C1238%5D%2C%22type%22:%22point%22%2C%22id%22:%22c3e718122ab94c7c1a0cfaf20d6c719cc5bacdb1%22%2C%22tagIds%22:%5B%5D%7D%2C%7B%22point%22:%5B92300%2C51363%2C1238%5D%2C%22type%22:%22point%22%2C%22id%22:%2281d695d9055eec5cf028cc8d8abf85011f950512%22%2C%22tagIds%22:%5B%5D%7D%2C%7B%22point%22:%5B93721%2C51574%2C1238%5D%2C%22type%22:%22point%22%2C%22id%22:%222b6e7b642179800b9664f4a4960db130ecce7bc24%22%2C%22tagIds%22:%5B%5D%7D%2C%7B%22point%22:%5B92734%2C50680%2C1243%5D%2C%22type%22:%22point%22%2C%22id%22:%2275b8cc632165c0656b47ed4a0f2f6835df85722e%22%2C%22tagIds%22:%5B%5D%7D%2C%7B%22point%22:%5B92318%2C51357%2C1243%5D%2C%22type%22:%22point%22%2C%22id%22:%2242c67dee68b30f85cad3a3a3fec68f3917c72fd8%22%2C%22tagIds%22:%5B%5D%7D%2C%7B%22point%22:%5B93736%2C51562%2C1243%5D%2C%22type%22:%22point%22%2C%22id%22:%221e250e4e57cee1a868a56faad3cf395473020756%22%2C%22tagIds%22:%5B%5D%7D%2C%7B%22point%22:%5B92359%2C51392%2C1249%5D%2C%22type%22:%22point%22%2C%22id%22:%22a3d53c0cf8f3af643f3615f80bad78fa29c043a7%22%2C%22tagIds%22:%5B%5D%7D%2C%7B%22point%22:%5B92784%2C50660%2C1249%5D%2C%22type%22:%22point%22%2C%22id%22:%227a8b9a14de8271a5bd5c02b1e6019b375d4f593b%22%2C%22tagIds%22:%5B%5D%7D%2C%7B%22point%22:%5B93780%2C51530%2C1249%5D%2C%22type%22:%22point%22%2C%22id%22:%2216e9883ea979fa8b58d9eb8520a4de41d71f792d%22%2C%22tagIds%22:%5B%5D%7D%2C%7B%22point%22:%5B92834%2C50654%2C1254%5D%2C%22type%22:%22point%22%2C%22id%22:%227ecb71d96c2dee12808faf37e3080d5c721beae3%22%2C%22tagIds%22:%5B%5D%7D%2C%7B%22point%22:%5B92359%2C51354%2C1254%5D%2C%22type%22:%22point%22%2C%22id%22:%2225e10ab7c9988e1ce6186b3abf05c9027dcef088%22%2C%22tagIds%22:%5B%5D%7D%2C%7B%22point%22:%5B93801%2C51515%2C1254%5D%2C%22type%22:%22point%22%2C%22id%22:%22a18fdf904d636dd73711a58cd85384478a8fc14f%22%2C%22tagIds%22:%5B%5D%7D%2C%7B%22point%22:%5B92839%2C50654%2C1259%5D%2C%22type%22:%22point%22%2C%22id%22:%22d0ee94f0333ebbe10948a199eea0559ca5e50ed9%22%2C%22tagIds%22:%5B%5D%7D%2C%7B%22point%22:%5B92368%

2C51363%2C1259%5D%2C%22type%22:%22point%22%2C%22id%22:%22c39adce9ccf4548f618a56bcf9d1cc523cbcd53a%22%2C%22tagIds%22:%5B%5D%7D%2C%7B%22point%22:%5B93795%2C51524%2C1259%5D%2C%22type%22:%22point%22%2C%22id%22:%223994f191690f46581d9b3a0f5a83da7be8e49286%22%2C%22tagIds%22:%5B%5D%7D%2C%7B%22point%22:%5B92848%2C50645%2C1264%5D%2C%22type%22:%22point%22%2C%22id%22:%2245590036877ec7fc46dff457335b82725f58c75%22%2C%22tagIds%22:%5B%5D%7D%2C%7B%22point%22:%5B92382%2C51322%2C1264%5D%2C%22type%22:%22point%22%2C%22id%22:%22294721e0f462f4e464c06995102555d8a774e2bd%22%2C%22tagIds%22:%5B%5D%7D%2C%7B%22point%22:%5B93824%2C51530%2C1264%5D%2C%22type%22:%22point%22%2C%22id%22:%22dc2ae626b2c89a296560ea66771de2b51210a392%22%2C%22tagIds%22:%5B%5D%7D%2C%7B%22point%22:%5B92804%2C50665%2C1269%5D%2C%22type%22:%22point%22%2C%22id%22:%2269620dc18b3cef75f9d0e78e09773a9d233a8cbb%22%2C%22tagIds%22:%5B%5D%7D%2C%7B%22point%22:%5B92397%2C51334%2C1269%5D%2C%22type%22:%22point%22%2C%22id%22:%22f4c7e42fe58a9eabc56b32327f334ebbb4e24ba3%22%2C%22tagIds%22:%5B%5D%7D%2C%7B%22point%22:%5B93818%2C51518%2C1269%5D%2C%22type%22:%22point%22%2C%22id%22:%225c047d8cfb2fce9fe0c4110e03fb37e3e587ea11%22%2C%22tagIds%22:%5B%5D%7D%2C%7B%22point%22:%5B92831%2C50657%2C1274%5D%2C%22type%22:%22point%22%2C%22id%22:%2227632a8ce5625792b28b48e649711211db25e99e%22%2C%22tagIds%22:%5B%5D%7D%2C%7B%22point%22:%5B92412%2C51331%2C1274%5D%2C%22type%22:%22point%22%2C%22id%22:%2219c4f484b2b1363e9a301624ead800a9f7356aa3%22%2C%22tagIds%22:%5B%5D%7D%2C%7B%22point%22:%5B93827%2C51487%2C1274%5D%2C%22type%22:%22point%22%2C%22id%22:%2263659624bce60f3e78217e0d0e6e3fa3256e25fa%22%2C%22tagIds%22:%5B%5D%7D%2C%7B%22point%22:%5B92836%2C50651%2C1279%5D%2C%22type%22:%22point%22%2C%22id%22:%220660f0b7a398f3b0964ce2393c8c8917766919e5%22%2C%22tagIds%22:%5B%5D%7D%2C%7B%22point%22:%5B92432%2C51304%2C1279%5D%2C%22type%22:%22point%22%2C%22id%22:%22137995eb448a948b6f0efe99e57e53eee4cab2e9%22%2C%22tagIds%22:%5B%5D%7D%2C%7B%22point%22:%5B93847%2C51489%2C1279%5D%2C%22type%22:%22point%22%2C%22id%22:%220d218ba5d7119ff259359403271e959676a84f2d%22%2C%22tagIds%22:%5B%5D%7D%2C%7B%22point%22:%5B92862%2C50642%2C1284%5D%2C%22type%22:%22point%22%2C%22id%22:%220212313aeef7424799dac71442a314832b37e7c3%22%2C%22tagIds%22:%5B%5D%7D%2C%7B%22point%22:%5B92452%2C51292%2C1284%5D%2C%22type%22:%22point%22%2C%22id%22:%22e4aa6eff8fcb01dc1df5c5fe594c4c75f2584a64%22%2C%22tagIds%22:%5B%5D%7D%2C%7B%22point%22:%5B93864%2C51471%2C1284%5D%2C%22type%22:%22point%22%2C%22id%22:%22f630594a5c8dd977849bb8d6ecb1d08193388193%22%2C%22tagIds%22:%5B%5D%7D%2C%7B%22point%22:%5B92865%2C50648%2C1289%5D%2C%22type%22:%22point%22%2C%22id%22:%227ee9c0b6f172a20664e9ab2edf2d4a2dc93904db%22%2C%22tagIds%22:%5B%5D%7D%2C%7B%22point%22:%5B92464%2C51304%2C1289%5D%2C%22type%22:%22point%22%2C%22id%22:%22d060abf284387386f64104923cf84e4a757e2644%22%2C%22tagIds%22:%5B%5D%7D%2C%7B%22point%22:%5B93891%2C51483%2C1289%5D%2C%22type%22:%22point%22%2C%22id%22:%229511fb98370d9668113e8fddb88f91ac539b3185%22%2C%22tagIds%22:%5B%5D%7D%2C%7B%22point%22:%5B92889%2C50633%2C1294%5D%2C%22type%22:%22point%22%2C%22id%22:%22c7747c10e2c1b8baed9840410850cf6bc3735241%22%2C%22tagIds%22:%5B%5D%7D%2C%7B%22point%22:%5B92484%2C51287%2C1294%5D%2C%22type%22:%22point%22%2C%22id%22:%221a897b52c672bacae95df2a5693c3b9ad121dcbd%22%2C%22tagIds%22:%5B%5D%7D%2C%7B%22point%22:%5B93923%2C51456%2C1294%5D%2C%22type%22:%22point%22%2C%22id%22:%22f9c73f8ddf08723aff37c556c32b55e41d68681b%22%2C%22tagIds%22:%5B%5D%7D%2C%7B%22point%22:%5B92915%2C50615%2C1299%5D%2C%22type%22:%22point%22%2C%22id%22:%2215071b8761d57721cb1a71e

fb0b329b0aba03ef8%22%2C%22tagIds%22:%5B%5D%7D%2C%7B%22point%22:%5B92496%2C51248%2C1299%5D%2C%22type%22:%22point%22%2C%22id%22:%22fddce55fce595ac986dcc3513be41124950cf934%22%2C%22tagIds%22:%5B%5D%7D%2C%7B%22point%22:%5B93952%2C51430%2C1299%5D%2C%22type%22:%22point%22%2C%22id%22:%2256987eeb7983140d3d09ee62492dc0725901196c%22%2C%22tagIds%22:%5B%5D%7D%2C%7B%22point%22:%5B92924%2C50618%2C1304%5D%2C%22type%22:%22point%22%2C%22id%22:%222bc1be76551f774c1b5a87850522d075b6f9174a8%22%2C%22tagIds%22:%5B%5D%7D%2C%7B%22point%22:%5B92514%2C51240%2C1304%5D%2C%22type%22:%22point%22%2C%22id%22:%22a31044bb478736227e48fdb9f539bc4a5b8b634d%22%2C%22tagIds%22:%5B%5D%7D%2C%7B%22point%22:%5B93974%2C51411%2C1304%5D%2C%22type%22:%22point%22%2C%22id%22:%2241a0b183de231bb425cdd07cafe8eeeb3cf4fede%22%2C%22tagIds%22:%5B%5D%7D%2C%7B%22point%22:%5B92913%2C50613%2C1309%5D%2C%22type%22:%22point%22%2C%22id%22:%22c44dc16c4ebcedfcc9a55562bd0cba113fc5afd7%22%2C%22tagIds%22:%5B%5D%7D%2C%7B%22point%22:%5B92520%2C51243%2C1309%5D%2C%22type%22:%22point%22%2C%22id%22:%2261f924649922c8208679451699c8d90048300cb6%22%2C%22tagIds%22:%5B%5D%7D%2C%7B%22point%22:%5B94000%2C51393%2C1309%5D%2C%22type%22:%22point%22%2C%22id%22:%221cb691f2d415eb1fbd3d9e5fdf5550a5a2f7f20%22%2C%22tagIds%22:%5B%5D%7D%2C%7B%22point%22:%5B92931%2C50602%2C1314%5D%2C%22type%22:%22point%22%2C%22id%22:%229025ca2dff71408eece679987d0ca42706028e18%22%2C%22tagIds%22:%5B%5D%7D%2C%7B%22point%22:%5B92538%2C51223%2C1314%5D%2C%22type%22:%22point%22%2C%22id%22:%22de37046fb49f6f85e1083a4639beb818cbc71ce0%22%2C%22tagIds%22:%5B%5D%7D%2C%7B%22point%22:%5B94021%2C51384%2C1314%5D%2C%22type%22:%22point%22%2C%22id%22:%22aa2092dd43c0f3b1116c5d1ef4d20acb8fe34c44%22%2C%22tagIds%22:%5B%5D%7D%2C%7B%22point%22:%5B94024%2C51399%2C1319%5D%2C%22type%22:%22point%22%2C%22id%22:%221307de265174383d4d397f8ff91a68f51fdffe06%22%2C%22tagIds%22:%5B%5D%7D%2C%7B%22point%22:%5B92550%2C51220%2C1319%5D%2C%22type%22:%22point%22%2C%22id%22:%22ae319bb927324109d813f73c891a47846e3da640%22%2C%22tagIds%22:%5B%5D%7D%2C%7B%22point%22:%5B92931%2C50593%2C1319%5D%2C%22type%22:%22point%22%2C%22id%22:%224ff43aa5ec8fc60c95cb42f5ec70a3b0cbbdc49f%22%2C%22tagIds%22:%5B%5D%7D%2C%7B%22point%22:%5B92579%2C51199%2C1324%5D%2C%22type%22:%22point%22%2C%22id%22:%229cb66f89e84416d6b6ec222992fbf9d567eae69e%22%2C%22tagIds%22:%5B%5D%7D%2C%7B%22point%22:%5B92951%2C50593%2C1324%5D%2C%22type%22:%22point%22%2C%22id%22:%2281be9ed314ac71eba95c9023eef6772b71e39a89%22%2C%22tagIds%22:%5B%5D%7D%2C%7B%22point%22:%5B94032%2C51396%2C1324%5D%2C%22type%22:%22point%22%2C%22id%22:%22ae2942c82fd6b11ba8a9dd001a12cb7d492c2a72%22%2C%22tagIds%22:%5B%5D%7D%2C%7B%22point%22:%5B92963%2C50593%2C1329%5D%2C%22type%22:%22point%22%2C%22id%22:%22c9b76b711c91800e7caf61647e46b067e3db5f8d%22%2C%22tagIds%22:%5B%5D%7D%2C%7B%22point%22:%5B92576%2C51196%2C1329%5D%2C%22type%22:%22point%22%2C%22id%22:%22a52e07be908fdb05d4f3f9915ca2f611b4d4edfa%22%2C%22tagIds%22:%5B%5D%7D%2C%7B%22point%22:%5B94044%2C51422%2C1329%5D%2C%22type%22:%22point%22%2C%22id%22:%22d8b034530d5b03723e44c36affc5da4782afaa70%22%2C%22tagIds%22:%5B%5D%7D%2C%7B%22point%22:%5B92960%2C50599%2C1334%5D%2C%22type%22:%22point%22%2C%22id%22:%2267b9ba9b75fe59f43566cea56e3abd4fc977c7f1%22%2C%22tagIds%22:%5B%5D%7D%2C%7B%22point%22:%5B92588%2C51199%2C1334%5D%2C%22type%22:%22point%22%2C%22id%22:%2252d811490bbaed5b3fe815d46444d4ee4182831f%22%2C%22tagIds%22:%5B%5D%7D%2C%7B%22point%22:%5B94041%2C51434%2C1334%5D%2C%22type%22:%22point%22%2C%22id%22:%22cca4f87ffec0a8e1771b55b64105009404be17%22%2C%22tagIds%22:%5B%5D%7D%2C%7B%22point%22:%5B92958%2C50606%2C1

339%5D%2C%22type%22:%22point%22%2C%22id%22:%224288247de71b04a158cb6d28ab5755bc16d7  
e67b%22%2C%22tagIds%22:%5B%5D%7D%2C%7B%22point%22:%5B92589%2C51200%2C1339%5D%2C  
%22type%22:%22point%22%2C%22id%22:%221657d86939cbcd8479de0fa0c2f805aa28a3456e%22%2C  
%22tagIds%22:%5B%5D%7D%2C%7B%22point%22:%5B94071%2C51403%2C1339%5D%2C%22type%22:  
%22point%22%2C%22id%22:%228e49d8f86c26b19498e0699f8a035f6b9152f6f0%22%2C%22tagIds%22:  
%5B%5D%7D%2C%7B%22point%22:%5B92973%2C50611%2C1344%5D%2C%22type%22:%22point%22  
%2C%22id%22:%22cda0721c78ead1704a95fe5ba405cb2077073b91%22%2C%22tagIds%22:%5B%5D%7  
D%2C%7B%22point%22:%5B92603%2C51189%2C1344%5D%2C%22type%22:%22point%22%2C%22id%  
22:%2242a51874c4bb3bba400c33ed4ce5bfa041a74135%22%2C%22tagIds%22:%5B%5D%7D%2C%7B%  
22point%22:%5B94101%2C51350%2C1344%5D%2C%22type%22:%22point%22%2C%22id%22:%223e51  
c3f5cc15e1c3b191b4e0e54adef382e6aef9%22%2C%22tagIds%22:%5B%5D%7D%2C%7B%22point%22:%  
5B92981%2C50603%2C1349%5D%2C%22type%22:%22point%22%2C%22id%22:%22a002b50bc6f51edd  
a22f73fc95c48750251162c6%22%2C%22tagIds%22:%5B%5D%7D%2C%7B%22point%22:%5B92612%2C5  
1177%2C1349%5D%2C%22type%22:%22point%22%2C%22id%22:%22681c77630db5fc07eafadd909c5a2  
2be9890d037%22%2C%22tagIds%22:%5B%5D%7D%2C%7B%22point%22:%5B94112%2C51341%2C1349  
%5D%2C%22type%22:%22point%22%2C%22id%22:%229e4f32f459b1550fca2eaa3dd5e82130965548a2  
%22%2C%22tagIds%22:%5B%5D%7D%2C%7B%22point%22:%5B92973%2C50620%2C1354%5D%2C%22t  
ype%22:%22point%22%2C%22id%22:%222b358eab5968b645d26b20d77172146ea89aac0%22%2C%22  
tagIds%22:%5B%5D%7D%2C%7B%22point%22:%5B92647%2C51177%2C1354%5D%2C%22type%22:%22  
point%22%2C%22id%22:%22e7b38510d4aa600195fe4e8c7d86e4d795232a71%22%2C%22tagIds%22:%  
5B%5D%7D%2C%7B%22point%22:%5B94145%2C51303%2C1354%5D%2C%22type%22:%22point%22%2  
C%22id%22:%222cfdcb9961fed3dd547f3031db0bdf3610d10340%22%2C%22tagIds%22:%5B%5D%7D%2  
C%7B%22point%22:%5B92970%2C50632%2C1359%5D%2C%22type%22:%22point%22%2C%22id%22:%  
22653c8323afe69e4ed8c83cb9b4241d94fc246f2c%22%2C%22tagIds%22:%5B%5D%7D%2C%7B%22poin  
t%22:%5B92677%2C51174%2C1359%5D%2C%22type%22:%22point%22%2C%22id%22:%22438cef3630  
346d4084420b1f0498983e578de7da%22%2C%22tagIds%22:%5B%5D%7D%2C%7B%22point%22:%5B94  
156%2C51274%2C1359%5D%2C%22type%22:%22point%22%2C%22id%22:%223ea12225b296cf00047fc  
b039cdad5a37dce56f7%22%2C%22tagIds%22:%5B%5D%7D%2C%7B%22point%22:%5B92692%2C51170  
%2C1364%5D%2C%22type%22:%22point%22%2C%22id%22:%22d60134f355b41fc53c42cc8f66d4ca0acc  
9124c5%22%2C%22tagIds%22:%5B%5D%7D%2C%7B%22point%22:%5B92973%2C50634%2C1364%5D%  
2C%22type%22:%22point%22%2C%22id%22:%22a485462b6ce69e2d36a2a30f5868b7cfbd0f2002%22%  
2C%22tagIds%22:%5B%5D%7D%2C%7B%22point%22:%5B94172%2C51276%2C1364%5D%2C%22type%  
22:%22point%22%2C%22id%22:%2250709987d7da3cac9fd42cc44c0a47a6bf0202d%22%2C%22tagIds%  
22:%5B%5D%7D%2C%7B%22point%22:%5B92991%2C50634%2C1369%5D%2C%22type%22:%22point%  
22%2C%22id%22:%2241c82d9f3e7d0fae5b6069f864c1f217ba2d3be5%22%2C%22tagIds%22:%5B%5D%  
7D%2C%7B%22point%22:%5B92721%2C51173%2C1369%5D%2C%22type%22:%22point%22%2C%22id  
%22:%22b00983d1f91ded1cc5ce229ded1ff696ef492857%22%2C%22tagIds%22:%5B%5D%7D%2C%7B%  
22point%22:%5B94204%2C51232%2C1369%5D%2C%22type%22:%22point%22%2C%22id%22:%2262e1  
72876704584dada5ce9168bca50dc5cbafa8%22%2C%22tagIds%22:%5B%5D%7D%2C%7B%22point%22:  
%5B92988%2C50643%2C1374%5D%2C%22type%22:%22point%22%2C%22id%22:%22afa5ad8f249229a  
63fed5ccd3caf8b1ba7ac27eb%22%2C%22tagIds%22:%5B%5D%7D%2C%7B%22point%22:%5B92748%2C  
51170%2C1374%5D%2C%22type%22:%22point%22%2C%22id%22:%22734bcaeba13336a601e6edcfc64  
9bba4785fb1c2%22%2C%22tagIds%22:%5B%5D%7D%2C%7B%22point%22:%5B94236%2C51203%2C13  
74%5D%2C%22type%22:%22point%22%2C%22id%22:%22f1b91c63e224d6ff0f6cc0f9b3686cf2e17e56ba

%22%2C%22tagIds%22:%5B%5D%7D%2C%7B%22point%22:%5B92994%2C50658%2C1379%5D%2C%22t  
ype%22:%22point%22%2C%22id%22:%2262f8e29aa2e9d4cfabc92b47c530ead6b7975f5a%22%2C%22ta  
gIds%22:%5B%5D%7D%2C%7B%22point%22:%5B92750%2C51085%2C1379%5D%2C%22type%22:%22p  
oint%22%2C%22id%22:%221410768ee875ae9872a7d622e44ade3ef3de6121%22%2C%22tagIds%22:%5  
B%5D%7D%2C%7B%22point%22:%5B94242%2C51217%2C1379%5D%2C%22type%22:%22point%22%2C  
%22id%22:%22ca26e9ceb268f9452e8ae6c94a3030bf144008da%22%2C%22tagIds%22:%5B%5D%7D%2  
C%7B%22point%22:%5B92771%2C51077%2C1384%5D%2C%22type%22:%22point%22%2C%22id%22:%  
223055864db2be31322cedf931b768617d027c0f38%22%2C%22tagIds%22:%5B%5D%7D%2C%7B%22poi  
nt%22:%5B93008%2C50655%2C1384%5D%2C%22type%22:%22point%22%2C%22id%22:%2219569977c  
69ada02aae4dc9edee8e02f833d7bd7%22%2C%22tagIds%22:%5B%5D%7D%2C%7B%22point%22:%5B9  
4248%2C51241%2C1384%5D%2C%22type%22:%22point%22%2C%22id%22:%22d39a963bc072f7f7b4e6  
11a8c75f3ce9b467e57d%22%2C%22tagIds%22:%5B%5D%7D%2C%7B%22point%22:%5B92976%2C5069  
0%2C1389%5D%2C%22type%22:%22point%22%2C%22id%22:%224ec3734889de15a6d4a43777486deb  
27a18193ee%22%2C%22tagIds%22:%5B%5D%7D%2C%7B%22point%22:%5B92792%2C51062%2C1389  
%5D%2C%22type%22:%22point%22%2C%22id%22:%226eae4ad36b4858807ce91568e2c96b579373cad  
0%22%2C%22tagIds%22:%5B%5D%7D%2C%7B%22point%22:%5B94236%2C51258%2C1389%5D%2C%2  
2type%22:%22point%22%2C%22id%22:%224657061a9c7f62cdb36b19ab9a714422d778aa2a%22%2C%2  
2tagIds%22:%5B%5D%7D%2C%7B%22point%22:%5B92961%2C50710%2C1394%5D%2C%22type%22:%2  
2point%22%2C%22id%22:%2242529a0a93a250e3dc735bf1b460b657e9463ac1%22%2C%22tagIds%22:  
%5B%5D%7D%2C%7B%22point%22:%5B92815%2C51065%2C1394%5D%2C%22type%22:%22point%22  
%2C%22id%22:%22d0b8d41d52f87d891c83e23dbf001473e7a63c76%22%2C%22tagIds%22:%5B%5D%7  
D%2C%7B%22point%22:%5B94242%2C51285%2C1394%5D%2C%22type%22:%22point%22%2C%22id%  
22:%22fd61c8199ecbf9dfe102a06d187a119cae577c13%22%2C%22tagIds%22:%5B%5D%7D%2C%7B%2  
2point%22:%5B92956%2C50731%2C1399%5D%2C%22type%22:%22point%22%2C%22id%22:%221e7d1  
7e0746f940242b01867e38d1ff9b7aa7af0%22%2C%22tagIds%22:%5B%5D%7D%2C%7B%22point%22:%  
5B92838%2C51047%2C1399%5D%2C%22type%22:%22point%22%2C%22id%22:%224f36bcc199a81699  
ee090e782bcc65fa8fea6d0%22%2C%22tagIds%22:%5B%5D%7D%2C%7B%22point%22:%5B94239%2C5  
1285%2C1399%5D%2C%22type%22:%22point%22%2C%22id%22:%227b629910adf98b8e0e3b0339e8aa  
7d82a5eab9d4%22%2C%22tagIds%22:%5B%5D%7D%2C%7B%22point%22:%5B92967%2C50740%2C140  
4%5D%2C%22type%22:%22point%22%2C%22id%22:%2277ec7a3ff98bbf885270d08dc11d3a7f6b64bcf7  
%22%2C%22tagIds%22:%5B%5D%7D%2C%7B%22point%22:%5B92856%2C51044%2C1404%5D%2C%22t  
ype%22:%22point%22%2C%22id%22:%222a5f1e5599740c9b59eeb978adb5ccedf16fe0a%22%2C%22ta  
gIds%22:%5B%5D%7D%2C%7B%22point%22:%5B94263%2C51279%2C1404%5D%2C%22type%22:%22p  
oint%22%2C%22id%22:%22fd110b40a2971efccdbc234a2a9c087832b739e1%22%2C%22tagIds%22:%5B  
%5D%7D%2C%7B%22point%22:%5B92973%2C50754%2C1409%5D%2C%22type%22:%22point%22%2C  
%22id%22:%22e9c2f46bf6b02f8c759eb93f29a32c908d572261%22%2C%22tagIds%22:%5B%5D%7D%2C  
%7B%22point%22:%5B92871%2C51050%2C1409%5D%2C%22type%22:%22point%22%2C%22id%22:%2  
2ee3c72261e52ce1571d06e9ccf3c50ac24476a46%22%2C%22tagIds%22:%5B%5D%7D%2C%7B%22point  
%22:%5B94303%2C51244%2C1409%5D%2C%22type%22:%22point%22%2C%22id%22:%22dd3117fdb71  
72adeb63c401edeb22e0cbd8216b4%22%2C%22tagIds%22:%5B%5D%7D%2C%7B%22point%22:%5B929  
64%2C50772%2C1415%5D%2C%22type%22:%22point%22%2C%22id%22:%22dd65139c607c7a3dc0484  
23844d3e855396347c%22%2C%22tagIds%22:%5B%5D%7D%2C%7B%22point%22:%5B92882%2C5107  
4%2C1415%5D%2C%22type%22:%22point%22%2C%22id%22:%22c43c1afaff129bbb10cb1030c535b1ad  
aaf4211f%22%2C%22tagIds%22:%5B%5D%7D%2C%7B%22point%22:%5B94303%2C51255%2C1415%5D

%2C%22type%22:%22point%22%2C%22id%22:%22bae130d8758e6e6496d23a881cfc6f7dc6b866e8%22  
%2C%22tagIds%22:%5B%5D%7D%2C%7B%22point%22:%5B92956%2C50789%2C1419%5D%2C%22type  
%22:%22point%22%2C%22id%22:%22eb81f3bfa85398e0006b59f140d6efa9355e85e8%22%2C%22tagId  
s%22:%5B%5D%7D%2C%7B%22point%22:%5B92888%2C51068%2C1419%5D%2C%22type%22:%22poin  
t%22%2C%22id%22:%22dfade683bba4b2fadea981a39fbc4aa8b228396d%22%2C%22tagIds%22:%5B%5  
D%7D%2C%7B%22point%22:%5B94306%2C51252%2C1419%5D%2C%22type%22:%22point%22%2C%22  
id%22:%2272a329584374e0730217fd0c1340c7624b356290%22%2C%22tagIds%22:%5B%5D%7D%2C%7  
B%22point%22:%5B92958%2C50801%2C1424%5D%2C%22type%22:%22point%22%2C%22id%22:%2224  
1e8c789d9ed83a4a00437ff66036162f3c071c%22%2C%22tagIds%22:%5B%5D%7D%2C%7B%22point%2  
2:%5B92900%2C51072%2C1424%5D%2C%22type%22:%22point%22%2C%22id%22:%226cef8215045b4  
104ea7d436e8775ddcc5cc85d37%22%2C%22tagIds%22:%5B%5D%7D%2C%7B%22point%22:%5B94301  
%2C51268%2C1424%5D%2C%22type%22:%22point%22%2C%22id%22:%225c81081cdea95d200a4e2a6  
461258368b358d843%22%2C%22tagIds%22:%5B%5D%7D%2C%7B%22point%22:%5B92956%2C50828%  
2C1429%5D%2C%22type%22:%22point%22%2C%22id%22:%22a28d275beced4b858f4174db99e4dc3d1  
a66efc6%22%2C%22tagIds%22:%5B%5D%7D%2C%7B%22point%22:%5B92903%2C51048%2C1429%5D  
%2C%22type%22:%22point%22%2C%22id%22:%2201331c6a39d96999d5319ed5b5daf3df61ac5ba4%22  
%2C%22tagIds%22:%5B%5D%7D%2C%7B%22point%22:%5B94298%2C51283%2C1429%5D%2C%22type  
%22:%22point%22%2C%22id%22:%2247d85638d1655c9f3e3cdea2929cfb658f47e43c%22%2C%22tagId  
s%22:%5B%5D%7D%2C%7B%22point%22:%5B94315%2C51283%2C1434%5D%2C%22type%22:%22poin  
t%22%2C%22id%22:%2248ee0b4389ad2efc8f10969590f8daf689aceedf%22%2C%22tagIds%22:%5B%5D  
%7D%2C%7B%22point%22:%5B92953%2C50825%2C1434%5D%2C%22type%22:%22point%22%2C%22i  
d%22:%22afc2ccda9ff86775f806a61e802dd6368828b95b%22%2C%22tagIds%22:%5B%5D%7D%2C%7B  
%22point%22:%5B92979%2C50963%2C1434%5D%2C%22type%22:%22point%22%2C%22id%22:%22e21  
57592fd861d30400ca0ac5cd6eb49794afebe%22%2C%22tagIds%22:%5B%5D%7D%2C%7B%22point%22  
:%5B92982%2C50960%2C1439%5D%2C%22type%22:%22point%22%2C%22id%22:%22a5f81a11482239  
a30fd4acde4a238cf52c2d9425%22%2C%22tagIds%22:%5B%5D%7D%2C%7B%22point%22:%5B92974%2  
C50957%2C1444%5D%2C%22type%22:%22point%22%2C%22id%22:%227d3bc80ef4eca29b6f9db4f68a2  
201a6bb3d02f8%22%2C%22tagIds%22:%5B%5D%7D%2C%7B%22point%22:%5B94327%2C51276%2C14  
44%5D%2C%22type%22:%22point%22%2C%22id%22:%2253e3b874484865665c636501de58d6b0443c2  
e99%22%2C%22tagIds%22:%5B%5D%7D%2C%7B%22point%22:%5B92971%2C50954%2C1449%5D%2C  
%22type%22:%22point%22%2C%22id%22:%2267d257e95b16a834cb02b76c078d034b0ad20663%22%2  
C%22tagIds%22:%5B%5D%7D%2C%7B%22point%22:%5B94327%2C51271%2C1449%5D%2C%22type%2  
2:%22point%22%2C%22id%22:%22bd904787befaa8524a9dc835cc1a01ad02ba2e5b%22%2C%22tagIds%  
22:%5B%5D%7D%2C%7B%22point%22:%5B92956%2C50951%2C1454%5D%2C%22type%22:%22point%  
22%2C%22id%22:%22eff562da856f256075eccf2bd545abb90e5555db%22%2C%22tagIds%22:%5B%5D%  
7D%2C%7B%22point%22:%5B94336%2C51274%2C1454%5D%2C%22type%22:%22point%22%2C%22id  
%22:%2269a232fb6d2805a4bcf36fff260287785cf7039a%22%2C%22tagIds%22:%5B%5D%7D%2C%7B%2  
2point%22:%5B92941%2C50960%2C1459%5D%2C%22type%22:%22point%22%2C%22id%22:%22deb90  
22c96bc0f7ffd423e2b0bdf991defcb6c5b%22%2C%22tagIds%22:%5B%5D%7D%2C%7B%22point%22:%5  
B94339%2C51256%2C1459%5D%2C%22type%22:%22point%22%2C%22id%22:%22b061eb01d726286c5  
0655de1b2fe1d0da637c54d%22%2C%22tagIds%22:%5B%5D%7D%2C%7B%22point%22:%5B92947%2C5  
0972%2C1464%5D%2C%22type%22:%22point%22%2C%22id%22:%228e3733a95f58c5b56b8f3ff048658  
14d027640fe%22%2C%22tagIds%22:%5B%5D%7D%2C%7B%22point%22:%5B94313%2C51306%2C1464  
%5D%2C%22type%22:%22point%22%2C%22id%22:%2261d6433a2b814960f9458b9740cb71dfcb79264c

%22%2C%22tagIds%22:%5B%5D%7D%2C%7B%22point%22:%5B92953%2C50983%2C1473%5D%2C%22t  
ype%22:%22point%22%2C%22id%22:%221bc98771643321fb0e41b38d19af40d97724ef6a%22%2C%22t  
agIds%22:%5B%5D%7D%2C%7B%22point%22:%5B92950%2C50978%2C1478%5D%2C%22type%22:%22  
point%22%2C%22id%22:%22b49b1bc7dd7030d67477b7e3e8eaf7a787b1538b%22%2C%22tagIds%22:%  
5B%5D%7D%2C%7B%22point%22:%5B92959%2C50957%2C1483%5D%2C%22type%22:%22point%22%2  
C%22id%22:%22db5f53b26cf1d7dc14f65dffbc726b58c7c44125%22%2C%22tagIds%22:%5B%5D%7D%2  
C%7B%22point%22:%5B94319%2C51306%2C1483%5D%2C%22type%22:%22point%22%2C%22id%22:%  
22937ca891ac86c598aeeca661d9cb73712d8e36f8%22%2C%22tagIds%22:%5B%5D%7D%2C%7B%22poi  
nt%22:%5B92962%2C50931%2C1488%5D%2C%22type%22:%22point%22%2C%22id%22:%22fe5ef38c77  
87cc4e6c294df89daa58b52723a8aa%22%2C%22tagIds%22:%5B%5D%7D%2C%7B%22point%22:%5B943  
22%2C51317%2C1488%5D%2C%22type%22:%22point%22%2C%22id%22:%22f940260e1049a19ab3e57  
7154f2f734640ade28b%22%2C%22tagIds%22:%5B%5D%7D%2C%7B%22point%22:%5B92965%2C50957  
%2C1493%5D%2C%22type%22:%22point%22%2C%22id%22:%22dbb9ba592cf97357a95fe4350063b4b7  
9ca5d741%22%2C%22tagIds%22:%5B%5D%7D%2C%7B%22point%22:%5B94348%2C51259%2C1493%5  
D%2C%22type%22:%22point%22%2C%22id%22:%22f0b288dcb00d41c4cde70e5087fde17bf4791c90%2  
2%2C%22tagIds%22:%5B%5D%7D%2C%7B%22point%22:%5B92968%2C50945%2C1499%5D%2C%22typ  
e%22:%22point%22%2C%22id%22:%22d7604d05f1e6f9c5ed4ee706825be2de960d27b1%22%2C%22tag  
Ids%22:%5B%5D%7D%2C%7B%22point%22:%5B94360%2C51244%2C1499%5D%2C%22type%22:%22poi  
nt%22%2C%22id%22:%22a11934b6dd7906c8d78ef30fb2d8ecc62757b958%22%2C%22tagIds%22:%5B%  
5D%7D%2C%7B%22point%22:%5B92977%2C50986%2C1504%5D%2C%22type%22:%22point%22%2C%2  
2id%22:%2266e78643327a40bfe87d601b92f58c39250edca3%22%2C%22tagIds%22:%5B%5D%7D%2C%  
7B%22point%22:%5B94383%2C51194%2C1504%5D%2C%22type%22:%22point%22%2C%22id%22:%22a  
e0a6ea07ad4c4df33b176fb5bca28b2c13f802e%22%2C%22tagIds%22:%5B%5D%7D%2C%7B%22point%  
22:%5B92982%2C50972%2C1509%5D%2C%22type%22:%22point%22%2C%22id%22:%22580cb59d75f7  
e92a68af8a7b3a7af39145351f99%22%2C%22tagIds%22:%5B%5D%7D%2C%7B%22point%22:%5B94389  
%2C51171%2C1509%5D%2C%22type%22:%22point%22%2C%22id%22:%2229e80ef976f239667763854a  
9427fe77a19c961d%22%2C%22tagIds%22:%5B%5D%7D%2C%7B%22point%22:%5B92985%2C50980%2  
C1514%5D%2C%22type%22:%22point%22%2C%22id%22:%2239a450e4549bb4754ecac8a66a4ec5345f1  
4cad3%22%2C%22tagIds%22:%5B%5D%7D%2C%7B%22point%22:%5B94386%2C51171%2C1514%5D%2  
C%22type%22:%22point%22%2C%22id%22:%228754a271417b0486c17a027013474a5fb9527c77%22%2  
C%22tagIds%22:%5B%5D%7D%2C%7B%22point%22:%5B94380%2C51165%2C1519%5D%2C%22type%2  
2:%22point%22%2C%22id%22:%22710e1324ffc2ec481c31c7490c2679a30522b2ec%22%2C%22tagIds%  
22:%5B%5D%7D%2C%7B%22point%22:%5B92994%2C50963%2C1519%5D%2C%22type%22:%22point%  
22%2C%22id%22:%2217eb2233ebb281a7993a183dcc45361b1f6df41d%22%2C%22tagIds%22:%5B%5D  
%7D%2C%7B%22point%22:%5B94404%2C51118%2C1524%5D%2C%22type%22:%22point%22%2C%22i  
d%22:%22b24a69f2e98701fd689e579927510a28bc16d4d0%22%2C%22tagIds%22:%5B%5D%7D%2C%7  
B%22point%22:%5B92991%2C50945%2C1524%5D%2C%22type%22:%22point%22%2C%22id%22:%22d0  
c33ce8e59fbd9059f589d928b18bdaa911a67a%22%2C%22tagIds%22:%5B%5D%7D%2C%7B%22point%2  
2:%5B92997%2C50957%2C1529%5D%2C%22type%22:%22point%22%2C%22id%22:%225afbdbbecd011  
3abcb61ef6981f6b17cfab0014%22%2C%22tagIds%22:%5B%5D%7D%2C%7B%22point%22:%5B94421%  
2C51086%2C1529%5D%2C%22type%22:%22point%22%2C%22id%22:%22a7f01cd18e3a86e5c94c9b9fce  
899ac5370dbc0d%22%2C%22tagIds%22:%5B%5D%7D%2C%7B%22point%22:%5B94371%2C51162%2C1  
534%5D%2C%22type%22:%22point%22%2C%22id%22:%22f2cd9708b3a24b786d8b5647bd3d99853db9  
22d8%22%2C%22tagIds%22:%5B%5D%7D%2C%7B%22point%22:%5B93006%2C50922%2C1534%5D%2C

%22type%22:%22point%22%2C%22id%22:%22789023495163946479907e338f7b8121b7c4823d%22%2C%22tagIds%22:%5B%5D%7D%2C%7B%22point%22:%5B93015%2C50892%2C1539%5D%2C%22type%22:%22point%22%2C%22id%22:%227dd71ae48b74d225f3b76c909a6936838e624cf9%22%2C%22tagIds%22:%5B%5D%7D%2C%7B%22point%22:%5B94375%2C51158%2C1539%5D%2C%22type%22:%22point%22%2C%22id%22:%223062cdc6c19e06f81208db61dbe3050aa90f0e9e%22%2C%22tagIds%22:%5B%5D%7D%2C%7B%22point%22:%5B93012%2C50847%2C1544%5D%2C%22type%22:%22point%22%2C%22id%22:%22529c68e79f04a494a68bf28d823443cd793930e3%22%2C%22tagIds%22:%5B%5D%7D%2C%7B%22point%22:%5B94360%2C51172%2C1544%5D%2C%22type%22:%22point%22%2C%22id%22:%2230a6b7f7e260acb811c76710e59af8ad1dcbef71%22%2C%22tagIds%22:%5B%5D%7D%2C%7B%22point%22:%5B93030%2C50826%2C1549%5D%2C%22type%22:%22point%22%2C%22id%22:%22a4779f311ccef33747ef9f5a36881950a326820b%22%2C%22tagIds%22:%5B%5D%7D%2C%7B%22point%22:%5B94375%2C51143%2C1549%5D%2C%22type%22:%22point%22%2C%22id%22:%22f3da7c125ecc468d66bf78a3e113ebbe0de7aab1%22%2C%22tagIds%22:%5B%5D%7D%2C%7B%22point%22:%5B93038%2C50812%2C1554%5D%2C%22type%22:%22point%22%2C%22id%22:%22b9323b539fccdc95551cf0a77de872e2e810603a%22%2C%22tagIds%22:%5B%5D%7D%2C%7B%22point%22:%5B94383%2C51158%2C1554%5D%2C%22type%22:%22point%22%2C%22id%22:%22cbe362c65e96215aefec5349cc0f1781d149971a%22%2C%22tagIds%22:%5B%5D%7D%2C%7B%22point%22:%5B94392%2C51146%2C1559%5D%2C%22type%22:%22point%22%2C%22id%22:%227849efb22bfa0ffba48866151ad39818d3723fde%22%2C%22tagIds%22:%5B%5D%7D%2C%7B%22point%22:%5B93047%2C50803%2C1559%5D%2C%22type%22:%22point%22%2C%22id%22:%223a735fba73e51c8a926031639d052f003de85d99%22%2C%22tagIds%22:%5B%5D%7D%2C%7B%22point%22:%5B94433%2C51093%2C1564%5D%2C%22type%22:%22point%22%2C%22id%22:%227e4b42efff4ac010c102f6a5754c9a79770a5c09%22%2C%22tagIds%22:%5B%5D%7D%2C%7B%22point%22:%5B93050%2C50777%2C1564%5D%2C%22type%22:%22point%22%2C%22id%22:%2227906ac49ac984ec0a0633900489a87f9a8d7f99%22%2C%22tagIds%22:%5B%5D%7D%2C%7B%22point%22:%5B93058%2C50781%2C1569%5D%2C%22type%22:%22point%22%2C%22id%22:%22ec17102c74bdd0da8ad433681b4a8713ff5cb1fe%22%2C%22tagIds%22:%5B%5D%7D%2C%7B%22point%22:%5B94430%2C51063%2C1569%5D%2C%22type%22:%22point%22%2C%22id%22:%22f86fee52c45f01a3572ef48aefaf6185c8903e60%22%2C%22tagIds%22:%5B%5D%7D%2C%7B%22point%22:%5B93064%2C50766%2C1574%5D%2C%22type%22:%22point%22%2C%22id%22:%22c60f748b5a73ffa66e3a943cc6c8ce043dea55f0%22%2C%22tagIds%22:%5B%5D%7D%2C%7B%22point%22:%5B94432%2C51053%2C1579%5D%2C%22type%22:%22point%22%2C%22id%22:%2245bf1d58cdf2658f9a03ba465ff9f60d0e6b4c82%22%2C%22tagIds%22:%5B%5D%7D%2C%7B%22point%22:%5B93072%2C50748%2C1579%5D%2C%22type%22:%22point%22%2C%22id%22:%22e797ad91cf3a015a4ce5ac79975114e66455ebfa%22%2C%22tagIds%22:%5B%5D%7D%2C%7B%22point%22:%5B93096%2C50763%2C1584%5D%2C%22type%22:%22point%22%2C%22id%22:%22879ae5f4c9a3b0ca02d1a8bf0af87dc14998f6ab%22%2C%22tagIds%22:%5B%5D%7D%2C%7B%22point%22:%5B94432%2C51047%2C1584%5D%2C%22type%22:%22point%22%2C%22id%22:%22151c2725f90ca56af376c82430d59bba7421bd6c%22%2C%22tagIds%22:%5B%5D%7D%2C%7B%22point%22:%5B93096%2C50763%2C1589%5D%2C%22type%22:%22point%22%2C%22id%22:%22bac75272d699f627015cff95d4986e42fa1aabbf%22%2C%22tagIds%22:%5B%5D%7D%2C%7B%22point%22:%5B94455%2C51036%2C1589%5D%2C%22type%22:%22point%22%2C%22id%22:%220a24aee3f239318a51cf19440c04fffef3cf8a26%22%2C%22tagIds%22:%5B%5D%7D%2C%7B%22point%22:%5B93096%2C50775%2C1594%5D%2C%22type%22:%22point%22%2C%22id%22:%22c8f5693fea062044f8d83e11943c3acfcba31ecb%22%2C%22tagIds%22:%5B%5D%7D%2C%7B%22point%22:%5B94441%2C51065%2C1594%5D%2C%22type%22:%22point%22%2C%22id%22:%228ec13612472b37ab68d65c194b6201e03d1f34a6%22%2C%22tag

lds%22:%5B%5D%7D%2C%7B%22point%22:%5B93105%2C50781%2C1599%5D%2C%22type%22:%22poi  
nt%22%2C%22id%22:%220e8028f2eef849be018cefc9db2866758c16899c%22%2C%22tagIds%22:%5B%5  
D%7D%2C%7B%22point%22:%5B94426%2C51074%2C1599%5D%2C%22type%22:%22point%22%2C%22  
id%22:%22469c0a0f0863216ab0e15918e28e3d61356778b1%22%2C%22tagIds%22:%5B%5D%7D%2C%7  
B%22point%22:%5B93099%2C50825%2C1604%5D%2C%22type%22:%22point%22%2C%22id%22:%22f6  
cd311a6319c790a1c4919b00d6c7f3e896fa4f%22%2C%22tagIds%22:%5B%5D%7D%2C%7B%22point%22  
:%5B94435%2C51056%2C1604%5D%2C%22type%22:%22point%22%2C%22id%22:%2281ee8786386e8e  
ba30a9fa6c52cb8da64ffc1e1a%22%2C%22tagIds%22:%5B%5D%7D%2C%7B%22point%22:%5B94420%2  
C51088%2C1609%5D%2C%22type%22:%22point%22%2C%22id%22:%2254922491c95ab509ca87aca495  
e2d0fab846d638%22%2C%22tagIds%22:%5B%5D%7D%2C%7B%22point%22:%5B93108%2C50792%2C1  
609%5D%2C%22type%22:%22point%22%2C%22id%22:%222088896a7f8a4ed6a001fb2a6eedb7aa629ae  
155%22%2C%22tagIds%22:%5B%5D%7D%2C%7B%22point%22:%5B93102%2C50801%2C1614%5D%2C  
%22type%22:%22point%22%2C%22id%22:%221fea3ad23c70240dd9006d99528db36c106b27a7%22%2C  
%22tagIds%22:%5B%5D%7D%2C%7B%22point%22:%5B94441%2C51071%2C1614%5D%2C%22type%22:  
%22point%22%2C%22id%22:%22c0cf3590218e014291214d6da261612fc4b641a4%22%2C%22tagIds%2  
2:%5B%5D%7D%2C%7B%22point%22:%5B93105%2C50784%2C1618%5D%2C%22type%22:%22point%2  
2%2C%22id%22:%2284c8d364daa9e34b172c0fbcbc7761df9ace7d28%22%2C%22tagIds%22:%5B%5D%7  
D%2C%7B%22point%22:%5B94453%2C51041%2C1618%5D%2C%22type%22:%22point%22%2C%22id%  
22:%227656e57f60d7fa81e474cef61b09fbda04c06732%22%2C%22tagIds%22:%5B%5D%7D%2C%7B%2  
2point%22:%5B94476%2C51039%2C1625%5D%2C%22type%22:%22point%22%2C%22id%22:%228975ef  
92cdc74f48e1c91d7a10e08b52aa7c4010%22%2C%22tagIds%22:%5B%5D%7D%2C%7B%22point%22:%5  
B93081%2C50757%2C1625%5D%2C%22type%22:%22point%22%2C%22id%22:%22672303de1103a19d1  
6421d9ce47301a921e6a18d%22%2C%22tagIds%22:%5B%5D%7D%2C%7B%22point%22:%5B93066%2C  
50719%2C1630%5D%2C%22type%22:%22point%22%2C%22id%22:%22decf7db34296f2cb2365bd5852f5  
69ab4b09f747%22%2C%22tagIds%22:%5B%5D%7D%2C%7B%22point%22:%5B94491%2C50995%2C163  
0%5D%2C%22type%22:%22point%22%2C%22id%22:%22de2c636ed5432eb1fe263ad4af9344d95c2503d  
b%22%2C%22tagIds%22:%5B%5D%7D%2C%7B%22point%22:%5B93066%2C50693%2C1635%5D%2C%2  
2type%22:%22point%22%2C%22id%22:%220cb089b9fc2d1f3d90743471efd956abe00757d8%22%2C%2  
2tagIds%22:%5B%5D%7D%2C%7B%22point%22:%5B94491%2C50962%2C1635%5D%2C%22type%22:%2  
2point%22%2C%22id%22:%224b1e6538ac88e3cd1f810fa7a0845a8f69ea1102%22%2C%22tagIds%22:%  
5B%5D%7D%2C%7B%22point%22:%5B93058%2C50669%2C1640%5D%2C%22type%22:%22point%22%2  
C%22id%22:%2270f0acac0fb8ff4fb7566acadecb715195ac6a08%22%2C%22tagIds%22:%5B%5D%7D%2C  
%7B%22point%22:%5B94526%2C50927%2C1640%5D%2C%22type%22:%22point%22%2C%22id%22:%2  
20c9342bff0c7edc6277249052eabab4beb94b179%22%2C%22tagIds%22:%5B%5D%7D%2C%7B%22poi  
nt%22:%5B93046%2C50661%2C1645%5D%2C%22type%22:%22point%22%2C%22id%22:%220b5f6e1153  
3ed2bdb745ad5789bf6ae10dfa208a%22%2C%22tagIds%22:%5B%5D%7D%2C%7B%22point%22:%5B94  
543%2C50913%2C1645%5D%2C%22type%22:%22point%22%2C%22id%22:%224d2659008a47b22c9a1c  
d939c07315bf74ca886c%22%2C%22tagIds%22:%5B%5D%7D%2C%7B%22point%22:%5B93031%2C5064  
3%2C1650%5D%2C%22type%22:%22point%22%2C%22id%22:%22ce8a3e918740fa8d88113386a475a5b  
0f8ca2154%22%2C%22tagIds%22:%5B%5D%7D%2C%7B%22point%22:%5B94567%2C50880%2C1650%5  
D%2C%22type%22:%22point%22%2C%22id%22:%22d8e052e2ec69002d8b8390ed81219516a7ca5cf2%2  
2%2C%22tagIds%22:%5B%5D%7D%2C%7B%22point%22:%5B93013%2C50620%2C1655%5D%2C%22typ  
e%22:%22point%22%2C%22id%22:%2271a3f6c6cf1a2fb9c41d305ac7362511daace0b6%22%2C%22tagI  
ds%22:%5B%5D%7D%2C%7B%22point%22:%5B94566%2C50866%2C1655%5D%2C%22type%22:%22poin

t%22%2C%22id%22:%22b705a08555d88ffcadd0c17a6e6eff6b290b7993%22%2C%22tagIds%22:%5B%5D%7D%2C%7B%22point%22:%5B92991%2C50572%2C1660%5D%2C%22type%22:%22point%22%2C%22id%22:%22ef9be6b110d60cd997f14190cbcb34eb670b33bb%22%2C%22tagIds%22:%5B%5D%7D%2C%7B%22point%22:%5B94550%2C50876%2C1660%5D%2C%22type%22:%22point%22%2C%22id%22:%226bdcbfac52f6598e8faf2cac4a1183f4b6bb1bcf%22%2C%22tagIds%22:%5B%5D%7D%2C%7B%22point%22:%5B92985%2C50598%2C1665%5D%2C%22type%22:%22point%22%2C%22id%22:%22102603fca982dc8a224c26f4f3bbdc4777864a46%22%2C%22tagIds%22:%5B%5D%7D%2C%7B%22point%22:%5B94553%2C50888%2C1665%5D%2C%22type%22:%22point%22%2C%22id%22:%222c498ffbe61f8d2507771d520b169ddd2a18649a%22%2C%22tagIds%22:%5B%5D%7D%2C%7B%22point%22:%5B92961%2C50551%2C1669%5D%2C%22type%22:%22point%22%2C%22id%22:%22fd881f867291da7fdacce5b8b54c2d6599abdf54%22%2C%22tagIds%22:%5B%5D%7D%2C%7B%22point%22:%5B94538%2C50888%2C1669%5D%2C%22type%22:%22point%22%2C%22id%22:%220c4591e944aba44cbf00eed973af6f8a8462527b%22%2C%22tagIds%22:%5B%5D%7D%2C%7B%22point%22:%5B94525%2C50898%2C1674%5D%2C%22type%22:%22point%22%2C%22id%22:%223ace4e18ea66d42320eb05e32a25fc60e5bf5e55%22%2C%22tagIds%22:%5B%5D%7D%2C%7B%22point%22:%5B92940%2C50576%2C1674%5D%2C%22type%22:%22point%22%2C%22id%22:%221017e515b5d6cba606531557e6e0514be2d6fcc6%22%2C%22tagIds%22:%5B%5D%7D%2C%7B%22point%22:%5B92919%2C50531%2C1679%5D%2C%22type%22:%22point%22%2C%22id%22:%220e691a9620414220d6ba3c21319ba889e5128ab2%22%2C%22tagIds%22:%5B%5D%7D%2C%7B%22point%22:%5B94542%2C50870%2C1679%5D%2C%22type%22:%22point%22%2C%22id%22:%2261f428c36235510f53b0e973e4235d50bae0cc9e%22%2C%22tagIds%22:%5B%5D%7D%2C%7B%22point%22:%5B94533%2C50858%2C1684%5D%2C%22type%22:%22point%22%2C%22id%22:%22a7a74d4ed23260671871fa407bf1e055f2b91d47%22%2C%22tagIds%22:%5B%5D%7D%2C%7B%22point%22:%5B92912%2C50523%2C1684%5D%2C%22type%22:%22point%22%2C%22id%22:%223c988ca61218c6bec4640c5eb194a88338e55ed7%22%2C%22tagIds%22:%5B%5D%7D%2C%7B%22point%22:%5B92884%2C50511%2C1690%5D%2C%22type%22:%22point%22%2C%22id%22:%22f8ed73a757393cbd25556f2e79234b109bb80cf5%22%2C%22tagIds%22:%5B%5D%7D%2C%7B%22point%22:%5B94527%2C50841%2C1690%5D%2C%22type%22:%22point%22%2C%22id%22:%225432306d831756fad65322a74e79cd6f37f423fa%22%2C%22tagIds%22:%5B%5D%7D%2C%7B%22point%22:%5B94520%2C50855%2C1695%5D%2C%22type%22:%22point%22%2C%22id%22:%22b9f1d4c114714506280b7884870d031f4f2cbb58%22%2C%22tagIds%22:%5B%5D%7D%2C%7B%22point%22:%5B92849%2C50512%2C1695%5D%2C%22type%22:%22point%22%2C%22id%22:%2275697887a9a7d7a4eea8b74d745114f3c68c3136%22%2C%22tagIds%22:%5B%5D%7D%2C%7B%22point%22:%5B94507%2C50862%2C1700%5D%2C%22type%22:%22point%22%2C%22id%22:%22a7186c917f697c360208a0c7d79b8307d704f8a0%22%2C%22tagIds%22:%5B%5D%7D%2C%7B%22point%22:%5B92798%2C50495%2C1700%5D%2C%22type%22:%22point%22%2C%22id%22:%22c197d80cef1eba4dbe763763824dd350ba381cf2%22%2C%22tagIds%22:%5B%5D%7D%2C%7B%22point%22:%5B92792%2C50460%2C1705%5D%2C%22type%22:%22point%22%2C%22id%22:%22807796c3069b63f6e43418700f63d2099b7acc5a%22%2C%22tagIds%22:%5B%5D%7D%2C%7B%22point%22:%5B94498%2C50871%2C1705%5D%2C%22type%22:%22point%22%2C%22id%22:%22c25fb94f9db720571b4d1bf8c4730ca9e995fd2b%22%2C%22tagIds%22:%5B%5D%7D%2C%7B%22point%22:%5B94483%2C50861%2C1710%5D%2C%22type%22:%22point%22%2C%22id%22:%2288000c913911b83ab9405fb32707ab07af387512%22%2C%22tagIds%22:%5B%5D%7D%2C%7B%22point%22:%5B92767%2C50436%2C1710%5D%2C%22type%22:%22point%22%2C%22id%22:%224c845e753a02e97462f0a99bf8b99c2cdb54c3a8%22%2C%22tagIds%22:%5B%5D%7D%2C%7B%22point%22:%5B92757%2C50404%2C1715%5D%2C%22type%22:%22point%22%2C%22id%22:%2275f979360666823e98ccbd7337cae73e23758d28%22%2C%22tagIds%22:%5B%

5D%7D%2C%7B%22point%22:%5B94467%2C50846%2C1720%5D%2C%22type%22:%22point%22%2C%22id%22:%2255f8ad659db06ce2dae4b9189e117cb0eb098b82%22%2C%22tagIds%22:%5B%5D%7D%2C%7B%22point%22:%5B92754%2C50366%2C1720%5D%2C%22type%22:%22point%22%2C%22id%22:%22882f743b9a8f0ca6b1f36bbe019e546ef5b1112a%22%2C%22tagIds%22:%5B%5D%7D%2C%7B%22point%22:%5B94464%2C50813%2C1725%5D%2C%22type%22:%22point%22%2C%22id%22:%22594e55148a1a48b47b69d98ce8fbd993f3b8d5%22%2C%22tagIds%22:%5B%5D%7D%2C%7B%22point%22:%5B94447%2C50790%2C1730%5D%2C%22type%22:%22point%22%2C%22id%22:%226c37f0f0590e8976a00be8cf6b0f7f83e80f23e1%22%2C%22tagIds%22:%5B%5D%7D%2C%7B%22point%22:%5B94421%2C50767%2C1735%5D%2C%22type%22:%22point%22%2C%22id%22:%22fdd6635eb927b194efa4b7cd8dd9f89cf3f7aedb%22%2C%22tagIds%22:%5B%5D%7D%2C%7B%22point%22:%5B92729%2C50244%2C1735%5D%2C%22type%22:%22point%22%2C%22id%22:%222b2e0a1a5671e13622ec73bcdbae767767832a8%22%2C%22tagIds%22:%5B%5D%7D%2C%7B%22point%22:%5B92747%2C50184%2C1740%5D%2C%22type%22:%22point%22%2C%22id%22:%22b5953c6f29b62fbd045a473252bee2a36e9b38c6%22%2C%22tagIds%22:%5B%5D%7D%2C%7B%22point%22:%5B94405%2C50722%2C1740%5D%2C%22type%22:%22point%22%2C%22id%22:%226eac0698074d414e7ed631360fee2991c6c4a783%22%2C%22tagIds%22:%5B%5D%7D%2C%7B%22point%22:%5B94376%2C50718%2C1745%5D%2C%22type%22:%22point%22%2C%22id%22:%2221917b4c4009c11a7d5d76cca89a173d39c345f8%22%2C%22tagIds%22:%5B%5D%7D%2C%7B%22point%22:%5B92836%2C50046%2C1745%5D%2C%22type%22:%22point%22%2C%22id%22:%22c22e51dd1fca6819e7c0adb019226ec5bbda3d3a%22%2C%22tagIds%22:%5B%5D%7D%2C%7B%22point%22:%5B92880%2C49992%2C1750%5D%2C%22type%22:%22point%22%2C%22id%22:%22b59ff00b4ca53a61cb3f3db3d3c5bfbf26a50ac2%22%2C%22tagIds%22:%5B%5D%7D%2C%7B%22point%22:%5B94349%2C50657%2C1755%5D%2C%22type%22:%22point%22%2C%22id%22:%2272a9f893818e40481ccce6f099996950efec5d35%22%2C%22tagIds%22:%5B%5D%7D%2C%7B%22point%22:%5B94336%2C50815%2C1758%5D%2C%22type%22:%22point%22%2C%22id%22:%227b6bb15df7a73a748587c7bfcf1ec3b6c6fb87c10%22%2C%22tagIds%22:%5B%5D%7D%2C%7B%22point%22:%5B94319%2C50817%2C1764%5D%2C%22type%22:%22point%22%2C%22id%22:%22258509be6835dbc9c925797bddee8d0902219f11%22%2C%22tagIds%22:%5B%5D%7D%2C%7B%22point%22:%5B94288%2C50829%2C1769%5D%2C%22type%22:%22point%22%2C%22id%22:%220758524f09ac5d265148a5515a635641f0eb97eb%22%2C%22tagIds%22:%5B%5D%7D%2C%7B%22point%22:%5B94272%2C50838%2C1774%5D%2C%22type%22:%22point%22%2C%22id%22:%22023f80dae31d1ce60268914bb67c9f5d1bbf7a37%22%2C%22tagIds%22:%5B%5D%7D%2C%7B%22point%22:%5B93298%2C49784%2C1774%5D%2C%22type%22:%22point%22%2C%22id%22:%222b9955d6af1a9735bdebdf613555f32e8c17bb2%22%2C%22tagIds%22:%5B%5D%7D%2C%7B%22point%22:%5B93360%2C49748%2C1779%5D%2C%22type%22:%22point%22%2C%22id%22:%22c35be82430c27d77d9b209c01008fea819f64bda%22%2C%22tagIds%22:%5B%5D%7D%2C%7B%22point%22:%5B94246%2C50842%2C1779%5D%2C%22type%22:%22point%22%2C%22id%22:%22ea559daeb4b8b5c0cc22a21477d2dae00f87f5fb%22%2C%22tagIds%22:%5B%5D%7D%2C%7B%22point%22:%5B94227%2C50844%2C1784%5D%2C%22type%22:%22point%22%2C%22id%22:%22d2436e5347d6b3343b44c7cb35d700b029099dce%22%2C%22tagIds%22:%5B%5D%7D%2C%7B%22point%22:%5B93467%2C49731%2C1789%5D%2C%22type%22:%22point%22%2C%22id%22:%2258e93d5f85c13b970fc8817a8eb4339c7be9c275%22%2C%22tagIds%22:%5B%5D%7D%2C%7B%22point%22:%5B94224%2C50838%2C1789%5D%2C%22type%22:%22point%22%2C%22id%22:%22b56519c684e81bd7ae3337d9927cde6018bf8a17%22%2C%22tagIds%22:%5B%5D%7D%2C%7B%22point%22:%5B93489%2C49731%2C1794%5D%2C%22type%22:%22point%22%2C%22id%22:%225e62fa0a15462ec8be78a8a3a360bbd73611d711%22%2C%22tagIds%22:%5B%5D%7D%2C%7B%22point%22:%5B93516%2C49726%2C1799%5D%2C%22type%22:%22point%22%2

C%22id%22:%2221b0baa6fb5e888b5096a3d6d5090cf23710f290%22%2C%22tagIds%22:%5B%5D%7D%2C%7B%22point%22:%5B94267%2C50578%2C1799%5D%2C%22type%22:%22point%22%2C%22id%22:%227e650cdd53ad90ce8da4d6163549a8001854174c%22%2C%22tagIds%22:%5B%5D%7D%2C%7B%22point%22:%5B94164%2C50869%2C1804%5D%2C%22type%22:%22point%22%2C%22id%22:%22be64c928b84931f7ffa22e9713c3228f7755bfed%22%2C%22tagIds%22:%5B%5D%7D%2C%7B%22point%22:%5B93526%2C49708%2C1804%5D%2C%22type%22:%22point%22%2C%22id%22:%22c0b05c5dd13127223322930692465fb7d8d88dbc%22%2C%22tagIds%22:%5B%5D%7D%2C%7B%22point%22:%5B93514%2C49696%2C1809%5D%2C%22type%22:%22point%22%2C%22id%22:%222ec05a4c1bfdd1b39239a929d1187624c4a26165%22%2C%22tagIds%22:%5B%5D%7D%2C%7B%22point%22:%5B94235%2C50558%2C1809%5D%2C%22type%22:%22point%22%2C%22id%22:%22fc018d3ef9e47f411b9bbd88f3303d4978375510%22%2C%22tagIds%22:%5B%5D%7D%2C%7B%22point%22:%5B94105%2C50877%2C1814%5D%2C%22type%22:%22point%22%2C%22id%22:%228f2f44ba1085c04a582c1a95cdcf6cc935a68255%22%2C%22tagIds%22:%5B%5D%7D%2C%7B%22point%22:%5B93511%2C49700%2C1814%5D%2C%22type%22:%22point%22%2C%22id%22:%22de8a84f3aa8f440080ad930bf5f7771939528139%22%2C%22tagIds%22:%5B%5D%7D%2C%7B%22point%22:%5B93522%2C49696%2C1819%5D%2C%22type%22:%22point%22%2C%22id%22:%22ef182fafdf4a313b99320fd56698fc960cfcea5%22%2C%22tagIds%22:%5B%5D%7D%2C%7B%22point%22:%5B94089%2C50857%2C1819%5D%2C%22type%22:%22point%22%2C%22id%22:%22f02f79554ee7f04d28a277bcbe984b19939dfded%22%2C%22tagIds%22:%5B%5D%7D%2C%7B%22point%22:%5B94058%2C50853%2C1824%5D%2C%22type%22:%22point%22%2C%22id%22:%2245a29ed32b4a341271822069f9008cb04f71d250%22%2C%22tagIds%22:%5B%5D%7D%2C%7B%22point%22:%5B94034%2C50841%2C1829%5D%2C%22type%22:%22point%22%2C%22id%22:%22a82471bcbb75810a34f614ceb08639b33369a5d7%22%2C%22tagIds%22:%5B%5D%7D%2C%7B%22point%22:%5B93998%2C50849%2C1834%5D%2C%22type%22:%22point%22%2C%22id%22:%220406a6879a62290fbd5f7520f73646b39e19e1%22%2C%22tagIds%22:%5B%5D%7D%2C%7B%22point%22:%5B94119%2C50437%2C1839%5D%2C%22type%22:%22point%22%2C%22id%22:%2254ab3d6f566187847c18a8da206b2cb57b90d3f5%22%2C%22tagIds%22:%5B%5D%7D%2C%7B%22point%22:%5B93938%2C50870%2C1839%5D%2C%22type%22:%22point%22%2C%22id%22:%226249683198888a7026743e3889fa69de16b1e2dc%22%2C%22tagIds%22:%5B%5D%7D%2C%7B%22point%22:%5B93470%2C49618%2C1844%5D%2C%22type%22:%22point%22%2C%22id%22:%228b188589919925dccbc120e61fee3da34b4774a7%22%2C%22tagIds%22:%5B%5D%7D%2C%7B%22point%22:%5B93910%2C50881%2C1844%5D%2C%22type%22:%22point%22%2C%22id%22:%2266e0ac341ee7e09a0bffa5e45281dabe4fe32abd%22%2C%22tagIds%22:%5B%5D%7D%2C%7B%22point%22:%5B93765%2C50906%2C1849%5D%2C%22type%22:%22point%22%2C%22id%22:%22fd77ca837d57f744a88a0253552256e60ec27aa0%22%2C%22tagIds%22:%5B%5D%7D%2C%7B%22point%22:%5B93481%2C49588%2C1849%5D%2C%22type%22:%22point%22%2C%22id%22:%2251ef79c361cc39c7b4b96ebc6cdd2aea6716cec7%22%2C%22tagIds%22:%5B%5D%7D%2C%7B%22point%22:%5B93462%2C49537%2C1855%5D%2C%22type%22:%22point%22%2C%22id%22:%229e46946470e494f1e8e02a06f5e6597bb4aa8c56%22%2C%22tagIds%22:%5B%5D%7D%2C%7B%22point%22:%5B93647%2C50912%2C1855%5D%2C%22type%22:%22point%22%2C%22id%22:%223ea7ad1a014af51bfad0468bc384df58719ebbc9%22%2C%22tagIds%22:%5B%5D%7D%2C%7B%22point%22:%5B92654%2C50616%2C1860%5D%2C%22type%22:%22point%22%2C%22id%22:%22ec8dc387fb2e8614c3770a64fbb4a1fbd922aa72%22%2C%22tagIds%22:%5B%5D%7D%2C%7B%22point%22:%5B93603%2C50872%2C1860%5D%2C%22type%22:%22point%22%2C%22id%22:%226065f7581db58cd99bc331600c851115be3a1a39%22%2C%22tagIds%22:%5B%5D%7D%2C%7B%22point%22:%5B93458%2C49502%2C1860%5D%2C%22type%22:%22point%22%2C%22id%22:%227ae1be6b6cf8a51e0301c9e4795bb5fac0c36ad8%22%2C%22tagIds%22:%5B%5D%7



d%22:%22a65a55c8eda596249676a42a7504ddd8057d1c5c%22%2C%22tagIds%22:%5B%5D%7D%2C%7B%22point%22:%5B92527%2C49712%2C1941%5D%2C%22type%22:%22point%22%2C%22id%22:%229c39c550fc1573f8fbcde52acfde19789fa6a98d8%22%2C%22tagIds%22:%5B%5D%7D%2C%7B%22point%22:%5B92992%2C48973%2C1941%5D%2C%22type%22:%22point%22%2C%22id%22:%22b58bb339b83da82f0664f5abf1c15e0e8c1ef40d%22%2C%22tagIds%22:%5B%5D%7D%2C%7B%22point%22:%5B92920%2C51840%2C1951%5D%2C%22type%22:%22point%22%2C%22id%22:%2254b78808d26669a40c482ac6dd80df399eb3228e%22%2C%22tagIds%22:%5B%5D%7D%2C%7B%22point%22:%5B92840%2C48865%2C1951%5D%2C%22type%22:%22point%22%2C%22id%22:%225bd5d6ad9ef29770d43ca7a80de20b876638bd43%22%2C%22tagIds%22:%5B%5D%7D%2C%7B%22point%22:%5B92905%2C51898%2C1970%5D%2C%22type%22:%22point%22%2C%22id%22:%22e7d2c72d89f76839bbc20b318106e1aad05cc91e%22%2C%22tagIds%22:%5B%5D%7D%2C%7B%22point%22:%5B92900%2C51939%2C1975%5D%2C%22type%22:%22point%22%2C%22id%22:%222d6ff4aa964a0351b7e8f7817431b9b37363f583%22%2C%22tagIds%22:%5B%5D%7D%2C%7B%22point%22:%5B92888%2C52065%2C1985%5D%2C%22type%22:%22point%22%2C%22id%22:%2202f4e9a03db9bb901f036b583644d22fb2d9644c%22%2C%22tagIds%22:%5B%5D%7D%2C%7B%22point%22:%5B92893%2C52225%2C1995%5D%2C%22type%22:%22point%22%2C%22id%22:%222858fe789b9083e48554eb33e8d559995cbad915%22%2C%22tagIds%22:%5B%5D%7D%2C%7B%22point%22:%5B92893%2C52362%2C2010%5D%2C%22type%22:%22point%22%2C%22id%22:%222d3a968986da285c32186aaac91481f1ddca7adc%22%2C%22tagIds%22:%5B%5D%7D%2C%7B%22point%22:%5B92903%2C52430%2C2016%5D%2C%22type%22:%22point%22%2C%22id%22:%22c99a91d84d522eb0809d3e10f2f438aaf241613e%22%2C%22tagIds%22:%5B%5D%7D%2C%7B%22point%22:%5B92871%2C52448%2C2021%5D%2C%22type%22:%22point%22%2C%22id%22:%22c9631f3ecb7359ed613f4d63327a9740628f8dac%22%2C%22tagIds%22:%5B%5D%7D%2C%7B%22point%22:%5B92853%2C52472%2C2026%5D%2C%22type%22:%22point%22%2C%22id%22:%22c37c302fc85661e9f45faec5b46887e672518d90%22%2C%22tagIds%22:%5B%5D%7D%2C%7B%22point%22:%5B92835%2C52499%2C2031%5D%2C%22type%22:%22point%22%2C%22id%22:%22d08d51a5f264812e640b595b57b97b69b7c88a2e%22%2C%22tagIds%22:%5B%5D%7D%2C%7B%22point%22:%5B92825%2C52553%2C2036%5D%2C%22type%22:%22point%22%2C%22id%22:%22416934a6bc3bf039021bccb7c526ee066a902640%22%2C%22tagIds%22:%5B%5D%7D%2C%7B%22point%22:%5B92790%2C52630%2C2049%5D%2C%22type%22:%22point%22%2C%22id%22:%22f12f31c174fa178222a1aef5844ae97cfcd47674%22%2C%22tagIds%22:%5B%5D%7D%2C%7B%22point%22:%5B93425%2C55311%2C2050%5D%2C%22type%22:%22point%22%2C%22id%22:%224e3178d61987f74982e3e9ed6f634c5a727a3850%22%2C%22tagIds%22:%5B%5D%7D%2C%7B%22point%22:%5B93441%2C55244%2C2055%5D%2C%22type%22:%22point%22%2C%22id%22:%22efee99ec51a94253d2605169d987515ff9398638%22%2C%22tagIds%22:%5B%5D%7D%2C%7B%22point%22:%5B92781%2C52752%2C2060%5D%2C%22type%22:%22point%22%2C%22id%22:%220b0bf86a881ed0efab6e50b1d46107a5847a6852%22%2C%22tagIds%22:%5B%5D%7D%2C%7B%22point%22:%5B93434%2C55083%2C2060%5D%2C%22type%22:%22point%22%2C%22id%22:%22c09110883a3d466257febf002c69344dd428c6f8%22%2C%22tagIds%22:%5B%5D%7D%2C%7B%22point%22:%5B92795%2C52802%2C2065%5D%2C%22type%22:%22point%22%2C%22id%22:%2296406eba73a7db26e15a92f4ae6a44fb3028005e%22%2C%22tagIds%22:%5B%5D%7D%2C%7B%22point%22:%5B92805%2C52849%2C2070%5D%2C%22type%22:%22point%22%2C%22id%22:%224164060b8b8e17e88ea2bd2527624706cc661b97%22%2C%22tagIds%22:%5B%5D%7D%2C%7B%22point%22:%5B92791%2C52872%2C2075%5D%2C%22type%22:%22point%22%2C%22id%22:%22b0524941defbba0a3a7e974d40658f46bb4dfdb%22%2C%22tagIds%22:%5B%5D%7D%2C%7B%22point%22:%5B93382%2C54672%2C2075%5D%2C%22type%22:%22point%22%2C%22id%22:%224b4cce6753641e900db0a890d682e8964ffe0d8c%22%2C%22tagIds%22:%5B%5D%

7D%2C%7B%22point%22:%5B92804%2C53118%2C2082%5D%2C%22type%22:%22point%22%2C%22id%22:%223766e5d831e7e9e10181138d7e61f18aa4833ea4%22%2C%22tagIds%22:%5B%5D%7D%2C%7B%22point%22:%5B93398%2C54669%2C2082%5D%2C%22type%22:%22point%22%2C%22id%22:%22a0aec11f2c8c69790cdb99e9e7683ef1617d830%22%2C%22tagIds%22:%5B%5D%7D%2C%7B%22point%22:%5B92660%2C48789%2C1963%5D%2C%22type%22:%22point%22%2C%22id%22:%22123e561e9a4634e6d0f3940557e8f659fb558574%22%2C%22tagIds%22:%5B%5D%7D%2C%7B%22point%22:%5B92030%2C49317%2C1963%5D%2C%22type%22:%22point%22%2C%22id%22:%226605a3ea33bd4272c81a06bc4680413dd4617a40%22%2C%22tagIds%22:%5B%5D%7D%2C%7B%22point%22:%5B92571%2C48751%2C1968%5D%2C%22type%22:%22point%22%2C%22id%22:%227c08ddbdc771cabe711a077a94e59ff75cf9108%22%2C%22tagIds%22:%5B%5D%7D%2C%7B%22point%22:%5B91978%2C49252%2C1968%5D%2C%22type%22:%22point%22%2C%22id%22:%223a092a64575e71e46b17b008f7d961c9dd4ea8d8%22%2C%22tagIds%22:%5B%5D%7D%2C%7B%22point%22:%5B92391%2C48635%2C1973%5D%2C%22type%22:%22point%22%2C%22id%22:%2228f26f55a6b7bfa320ba35c33caa3577ec5c02e84%22%2C%22tagIds%22:%5B%5D%7D%2C%7B%22point%22:%5B90617%2C47856%2C1983%5D%2C%22type%22:%22point%22%2C%22id%22:%22c0a6ea8865b86514500ba175a1a9c97d0cb5ff84%22%2C%22tagIds%22:%5B%5D%7D%2C%7B%22point%22:%5B91483%2C48219%2C1987%5D%2C%22type%22:%22point%22%2C%22id%22:%2229428648b7441bdfcafbd65a96e078d35fc3fd97%22%2C%22tagIds%22:%5B%5D%7D%2C%7B%22point%22:%5B90667%2C47921%2C1987%5D%2C%22type%22:%22point%22%2C%22id%22:%2202ce6eea12dc761203d876567383e0a968cc84f8%22%2C%22tagIds%22:%5B%5D%7D%2C%7B%22point%22:%5B89898%2C47630%2C1975%5D%2C%22type%22:%22point%22%2C%22id%22:%228ad0419ddb188eda10a75fd26606a6c121e5c2e0%22%2C%22tagIds%22:%5B%5D%7D%2C%7B%22point%22:%5B90205%2C48582%2C1974%5D%2C%22type%22:%22point%22%2C%22id%22:%22b921e73e7ef1297e210ac6e26cfa1d1fa7ead802%22%2C%22tagIds%22:%5B%5D%7D%2C%7B%22point%22:%5B89664%2C47565%2C1969%5D%2C%22type%22:%22point%22%2C%22id%22:%22ed477631583137deccf5f599ddb9b88ff5c470e%22%2C%22tagIds%22:%5B%5D%7D%2C%7B%22point%22:%5B90071%2C48595%2C1969%5D%2C%22type%22:%22point%22%2C%22id%22:%22ceae098a350b7f1f48d63e66bc7163040b49be5c%22%2C%22tagIds%22:%5B%5D%7D%2C%7B%22point%22:%5B89577%2C47522%2C1964%5D%2C%22type%22:%22point%22%2C%22id%22:%2226ef8ca471525519de3fda9e268b1e0d649ed750b%22%2C%22tagIds%22:%5B%5D%7D%2C%7B%22point%22:%5B89980%2C48604%2C1964%5D%2C%22type%22:%22point%22%2C%22id%22:%2295d11ab5805bfe98af128f889572fce0dca0964%22%2C%22tagIds%22:%5B%5D%7D%2C%7B%22point%22:%5B89538%2C47509%2C1959%5D%2C%22type%22:%22point%22%2C%22id%22:%22308eccbdbae49aaa3d5efe802c85e8eeff0855b%22%2C%22tagIds%22:%5B%5D%7D%2C%7B%22point%22:%5B89893%2C48582%2C1959%5D%2C%22type%22:%22point%22%2C%22id%22:%223118029931a90037de7ff20e8a833e1ac2ddf643%22%2C%22tagIds%22:%5B%5D%7D%2C%7B%22point%22:%5B89536%2C47488%2C1954%5D%2C%22type%22:%22point%22%2C%22id%22:%2208d475d2801c7f5d47d5340356c2d95124838012%22%2C%22tagIds%22:%5B%5D%7D%2C%7B%22point%22:%5B89821%2C48578%2C1952%5D%2C%22type%22:%22point%22%2C%22id%22:%22af49e9bc8f92a90704fa889f44feafe1e1fdc25a%22%2C%22tagIds%22:%5B%5D%7D%2C%7B%22point%22:%5B89337%2C47427%2C1946%5D%2C%22type%22:%22point%22%2C%22id%22:%22b591e2fc7485339850b40abde6940d1cb4b8733a%22%2C%22tagIds%22:%5B%5D%7D%2C%7B%22point%22:%5B89389%2C48440%2C1946%5D%2C%22type%22:%22point%22%2C%22id%22:%2238f6c0b0b1ad12bdc15063e4cd268f08309fc83f%22%2C%22tagIds%22:%5B%5D%7D%2C%7B%22point%22:%5B89056%2C48284%2C1939%5D%2C%22type%22:%22point%22%2C%22id%22:%22203d86e632349746a9cd76b1f9f694d7ce791a8b%22%2C%22tagIds%22:%5B%5D%7D%2C%7B%22point%22:%5B89181%2C47380%2C1938%5D%2C%22type%22:%22point%22%2C%22

id%22:%22226fb96216adadb01f277ae9e25fee5a90a766238%22%2C%22tagIds%22:%5B%5D%7D%2C%7B%22point%22:%5B88941%2C47318%2C1926%5D%2C%22type%22:%22point%22%2C%22id%22:%226449ed864507aebe29fd53a9026d5ec8b38f0d31%22%2C%22tagIds%22:%5B%5D%7D%2C%7B%22point%22:%5B88893%2C48278%2C1926%5D%2C%22type%22:%22point%22%2C%22id%22:%2295ffdb9ad6e85b8451e8f57d63efbdc7a6ba0cf9%22%2C%22tagIds%22:%5B%5D%7D%2C%7B%22point%22:%5B88772%2C47283%2C1913%5D%2C%22type%22:%22point%22%2C%22id%22:%22d03429cccae5010ad52e471bae28f5e1174c3941%22%2C%22tagIds%22:%5B%5D%7D%2C%7B%22point%22:%5B88668%2C48296%2C1913%5D%2C%22type%22:%22point%22%2C%22id%22:%2260d5a7f518c60eb2ddcde85b53272aff251bc581%22%2C%22tagIds%22:%5B%5D%7D%2C%7B%22point%22:%5B88703%2C47275%2C1905%5D%2C%22type%22:%22point%22%2C%22id%22:%2232fa3a42e4808cd0163be0ecf165f6d3888282b6%22%2C%22tagIds%22:%5B%5D%7D%2C%7B%22point%22:%5B88556%2C48304%2C1905%5D%2C%22type%22:%22point%22%2C%22id%22:%225c92fdbed510978e42ca7cd3596f611a58cc7c47%22%2C%22tagIds%22:%5B%5D%7D%2C%7B%22point%22:%5B88695%2C47288%2C1895%5D%2C%22type%22:%22point%22%2C%22id%22:%22ec9892bb1a9322dec69e8723c0c99e722be959c2%22%2C%22tagIds%22:%5B%5D%7D%2C%7B%22point%22:%5B88462%2C48283%2C1895%5D%2C%22type%22:%22point%22%2C%22id%22:%22d0b02c9ed338743b1e8acb778f0b70494d2fc873%22%2C%22tagIds%22:%5B%5D%7D%2C%7B%22point%22:%5B88589%2C47277%2C1888%5D%2C%22type%22:%22point%22%2C%22id%22:%222f2fa6d4fcabd484d7adbdb53b333da5927ff2cb%22%2C%22tagIds%22:%5B%5D%7D%2C%7B%22point%22:%5B88503%2C48268%2C1888%5D%2C%22type%22:%22point%22%2C%22id%22:%22105f5730ac2c04554f4b46a1bf19519cdaad2fbd%22%2C%22tagIds%22:%5B%5D%7D%2C%7B%22point%22:%5B88589%2C47290%2C1878%5D%2C%22type%22:%22point%22%2C%22id%22:%22e9d76dc14fd8ce0b7305fb0e9bd0edb6a802c791%22%2C%22tagIds%22:%5B%5D%7D%2C%7B%22point%22:%5B88732%2C48255%2C1878%5D%2C%22type%22:%22point%22%2C%22id%22:%227b138f54b0cb2e982571a6cb9bdaea835eeef182%22%2C%22tagIds%22:%5B%5D%7D%2C%7B%22point%22:%5B88555%2C47308%2C1873%5D%2C%22type%22:%22point%22%2C%22id%22:%220b291e4a22ea7859fbc14e640887e1fe3926426c%22%2C%22tagIds%22:%5B%5D%7D%2C%7B%22point%22:%5B88775%2C48234%2C1873%5D%2C%22type%22:%22point%22%2C%22id%22:%22b17b758f151e9582ca6862e5cd5e79184c7fce3b%22%2C%22tagIds%22:%5B%5D%7D%2C%7B%22point%22:%5B88529%2C47321%2C1868%5D%2C%22type%22:%22point%22%2C%22id%22:%2229aecc1383e15df307b66d8ecbcc51467a25a7b5%22%2C%22tagIds%22:%5B%5D%7D%2C%7B%22point%22:%5B88780%2C48195%2C1868%5D%2C%22type%22:%22point%22%2C%22id%22:%22af6de777a9a40749ccb375e08c20cc341800e53a%22%2C%22tagIds%22:%5B%5D%7D%2C%7B%22point%22:%5B88698%2C48156%2C1861%5D%2C%22type%22:%22point%22%2C%22id%22:%22fc40480096ef860940388a01b0242674bc024790%22%2C%22tagIds%22:%5B%5D%7D%2C%7B%22point%22:%5B88538%2C47373%2C1861%5D%2C%22type%22:%22point%22%2C%22id%22:%223c881c1547eac519118b814ae3b1806dfbf01d7a%22%2C%22tagIds%22:%5B%5D%7D%2C%7B%22point%22:%5B88646%2C47476%2C1856%5D%2C%22type%22:%22point%22%2C%22id%22:%22ebaac882d35ea93b8562eeba352a73084b2dc48f%22%2C%22tagIds%22:%5B%5D%7D%2C%7B%22point%22:%5B88685%2C48121%2C1856%5D%2C%22type%22:%22point%22%2C%22id%22:%22b5e4226ce020138f67f307398cd8078f7bd08b45%22%2C%22tagIds%22:%5B%5D%7D%2C%7B%22point%22:%5B88715%2C47611%2C1851%5D%2C%22type%22:%22point%22%2C%22id%22:%224ad1b262d9d3ff802db7a099f6d2c555a4d59d4a%22%2C%22tagIds%22:%5B%5D%7D%2C%7B%22point%22:%5B88620%2C48108%2C1851%5D%2C%22type%22:%22point%22%2C%22id%22:%225066dab8c1bc280a6781668660682831cab773e7%22%2C%22tagIds%22:%5B%5D%7D%2C%7B%22point%22:%5B88728%2C47723%2C1845%5D%2C%22type%22:%22point%22%2C%22id%22:%22f17783f87c8c4beecf674e9dbe27961c537e5434%22%2C%22tagIds%22:%5B%5D%7D

%2C%7B%22point%22:%5B88646%2C48030%2C1845%5D%2C%22type%22:%22point%22%2C%22id%22:  
:%22444639819402f38b3797af4652a1c0c8167aa3a8%22%2C%22tagIds%22:%5B%5D%7D%2C%7B%22p  
oint%22:%5B83038%2C50322%2C1899%5D%2C%22type%22:%22point%22%2C%22id%22:%22daf89af2  
3181daf10182f1623d9f3137b0e69b25%22%2C%22tagIds%22:%5B%5D%7D%2C%7B%22point%22:%5B8  
4387%2C54322%2C1899%5D%2C%22type%22:%22point%22%2C%22id%22:%223dfa3c9d2d2e73ca5d6  
11b67c08d21b5f0a92558%22%2C%22tagIds%22:%5B%5D%7D%2C%7B%22point%22:%5B93390%2C571  
24%2C2032%5D%2C%22type%22:%22point%22%2C%22id%22:%2262cb94e94121ffd55c10446642236a  
2419b05c24%22%2C%22tagIds%22:%5B%5D%7D%2C%7B%22point%22:%5B93368%2C55736%2C2032  
%5D%2C%22type%22:%22point%22%2C%22id%22:%22530053eedeab4c04c98378c7df1ebcf91614bb8f  
%22%2C%22tagIds%22:%5B%5D%7D%2C%7B%22point%22:%5B92804%2C52592%2C2044%5D%2C%22t  
ype%22:%22point%22%2C%22id%22:%227230f63ad806d13d5873c86732c7f5a354a9d8c7%22%2C%22t  
agIds%22:%5B%5D%7D%2C%7B%22point%22:%5B93269%2C54237%2C2090%5D%2C%22type%22:%22  
point%22%2C%22id%22:%228d58b9a37185b3962e886e1fef535b3176de0474%22%2C%22tagIds%22:%  
5B%5D%7D%2C%7B%22point%22:%5B94366%2C58333%2C2022%5D%2C%22type%22:%22point%22%2  
C%22id%22:%22dd227eff1504c29383bfd2c31b0c79e42ba1c58a%22%2C%22tagIds%22:%5B%5D%7D%2  
C%7B%22point%22:%5B94372%2C58344%2C2017%5D%2C%22type%22:%22point%22%2C%22id%22:%  
22d9d1d7501013c5863c9c211ce0767c8b3cd5ae81%22%2C%22tagIds%22:%5B%5D%7D%2C%7B%22poi  
nt%22:%5B94424%2C58384%2C2012%5D%2C%22type%22:%22point%22%2C%22id%22:%220e7806dee  
948e227d5324ce965ec4a2ff2767430%22%2C%22tagIds%22:%5B%5D%7D%2C%7B%22point%22:%5B94  
455%2C57335%2C2004%5D%2C%22type%22:%22point%22%2C%22id%22:%22836a0d109e1963f0cda9  
4811d44a7dd955534ef7%22%2C%22tagIds%22:%5B%5D%7D%2C%7B%22point%22:%5B94533%2C5751  
0%2C1997%5D%2C%22type%22:%22point%22%2C%22id%22:%22ff976786d13d69017de53b2d119bbdf  
0a82d6f77%22%2C%22tagIds%22:%5B%5D%7D%2C%7B%22point%22:%5B94636%2C57606%2C1993%5  
D%2C%22type%22:%22point%22%2C%22id%22:%22d49cd5198420da6ec54e2a16013e97c557b91e80%  
22%2C%22tagIds%22:%5B%5D%7D%2C%7B%22point%22:%5B94777%2C58670%2C1993%5D%2C%22ty  
pe%22:%22point%22%2C%22id%22:%22905ac8d4ac65c97762f8a1a38436fcf2dd816498%22%2C%22tag  
Ids%22:%5B%5D%7D%2C%7B%22point%22:%5B94935%2C57768%2C1990%5D%2C%22type%22:%22poi  
nt%22%2C%22id%22:%22ecfda2c370b282b9186d4c57f7a14de5c78488ca%22%2C%22tagIds%22:%5B%  
5D%7D%2C%7B%22point%22:%5B95401%2C58085%2C1983%5D%2C%22type%22:%22point%22%2C%2  
2id%22:%22f969b897874660d60d73cfb4fbf1dc59c40fb01d%22%2C%22tagIds%22:%5B%5D%7D%2C%7  
B%22point%22:%5B95511%2C58202%2C1978%5D%2C%22type%22:%22point%22%2C%22id%22:%22ed  
54c8d6dcc9ce17957187dd3ef3952f177bb49c%22%2C%22tagIds%22:%5B%5D%7D%2C%7B%22point%2  
2:%5B95067%2C58918%2C1975%5D%2C%22type%22:%22point%22%2C%22id%22:%22f4a4c56a75561  
7b5e044cdc75e305678ce8614f9%22%2C%22tagIds%22:%5B%5D%7D%2C%7B%22point%22:%5B95711  
%2C58405%2C1970%5D%2C%22type%22:%22point%22%2C%22id%22:%22f55eb212bd924bbea37caa1  
cb39d486d25a997ce%22%2C%22tagIds%22:%5B%5D%7D%2C%7B%22point%22:%5B95455%2C59331%  
2C1970%5D%2C%22type%22:%22point%22%2C%22id%22:%222b980ac04ba20c1fa9720d03190288e08  
ac3dba7%22%2C%22tagIds%22:%5B%5D%7D%2C%7B%22point%22:%5B96082%2C60020%2C1964%5D  
%2C%22type%22:%22point%22%2C%22id%22:%2237e21bdcbfc07413985735d77e20c97f55c6d841%22  
%2C%22tagIds%22:%5B%5D%7D%2C%7B%22point%22:%5B96160%2C60113%2C1959%5D%2C%22type  
%22:%22point%22%2C%22id%22:%2231444d8d87d1ee953eb58312fde2b209ffa652a2%22%2C%22tagId  
s%22:%5B%5D%7D%2C%7B%22point%22:%5B96227%2C60198%2C1955%5D%2C%22type%22:%22poin  
t%22%2C%22id%22:%224281da319bf5c36ec0a602cd17a4f4f5fe3bb16f%22%2C%22tagIds%22:%5B%5D  
%7D%2C%7B%22point%22:%5B96470%2C60375%2C1945%5D%2C%22type%22:%22point%22%2C%22i

d%22:%22b254640e368430909c3bd2ae2b0163e023dacf3f%22%2C%22tagIds%22:%5B%5D%7D%2C%7B%22point%22:%5B96170%2C58942%2C1945%5D%2C%22type%22:%22point%22%2C%22id%22:%2267da5ddda07d695d43b81af60a234b2fbd70d18d%22%2C%22tagIds%22:%5B%5D%7D%2C%7B%22point%22:%5B96565%2C60456%2C1940%5D%2C%22type%22:%22point%22%2C%22id%22:%2243ff2389a806ad870ea4bb564a1302db546f049a%22%2C%22tagIds%22:%5B%5D%7D%2C%7B%22point%22:%5B96699%2C59394%2C1935%5D%2C%22type%22:%22point%22%2C%22id%22:%221ea4e980791319da4963e02e95a3d5d132bd5bba%22%2C%22tagIds%22:%5B%5D%7D%2C%7B%22point%22:%5B96780%2C60647%2C1929%5D%2C%22type%22:%22point%22%2C%22id%22:%22ff27a6ab1f15188afbc15072612383fcc84301c%22%2C%22tagIds%22:%5B%5D%7D%2C%7B%22point%22:%5B97014%2C59628%2C1925%5D%2C%22type%22:%22point%22%2C%22id%22:%220bbbb97411cf6d1f4558df593b4f4d5a81e824dd%22%2C%22tagIds%22:%5B%5D%7D%2C%7B%22point%22:%5B96866%2C60705%2C1925%5D%2C%22type%22:%22point%22%2C%22id%22:%22efe60e0e12fbf3ee4b4bb72f4d2a65cca4571293%22%2C%22tagIds%22:%5B%5D%7D%2C%7B%22point%22:%5B97013%2C60831%2C1920%5D%2C%22type%22:%22point%22%2C%22id%22:%2243d7a8ecf66c7b49e07581d5b97ccff5f75e8038%22%2C%22tagIds%22:%5B%5D%7D%2C%7B%22point%22:%5B97140%2C59748%2C1920%5D%2C%22type%22:%22point%22%2C%22id%22:%22253bc53f8b98fc5ad5c80b068704919db4736302%22%2C%22tagIds%22:%5B%5D%7D%2C%7B%22point%22:%5B97352%2C59928%2C1912%5D%2C%22type%22:%22point%22%2C%22id%22:%220774bb769892c4c3393712532a242fc2bb1b9570%22%2C%22tagIds%22:%5B%5D%7D%2C%7B%22point%22:%5B97080%2C60898%2C1912%5D%2C%22type%22:%22point%22%2C%22id%22:%2283856003dc6cbc45145f266aa9cf2d943883a447%22%2C%22tagIds%22:%5B%5D%7D%2C%7B%22point%22:%5B97291%2C61110%2C1905%5D%2C%22type%22:%22point%22%2C%22id%22:%22bb6ee328bdcad7f1fd7f6ec90e513b7d8afb3c5d%22%2C%22tagIds%22:%5B%5D%7D%2C%7B%22point%22:%5B97468%2C60037%2C1905%5D%2C%22type%22:%22point%22%2C%22id%22:%221e75df265d23abed2dc083936db47fbe17e8d46b%22%2C%22tagIds%22:%5B%5D%7D%2C%7B%22point%22:%5B97476%2C61254%2C1899%5D%2C%22type%22:%22point%22%2C%22id%22:%2208b7c0b1b4783a80e5a2cc9febaff12f2b82b171%22%2C%22tagIds%22:%5B%5D%7D%2C%7B%22point%22:%5B97802%2C60314%2C1894%5D%2C%22type%22:%22point%22%2C%22id%22:%22c9e845982342d4ac43d069cfa6c22405a8ecd814%22%2C%22tagIds%22:%5B%5D%7D%2C%7B%22point%22:%5B97667%2C61394%2C1884%5D%2C%22type%22:%22point%22%2C%22id%22:%2246b93f3098c385e25ca16786b87a3dc33006f1be%22%2C%22tagIds%22:%5B%5D%7D%2C%7B%22point%22:%5B97984%2C61721%2C1879%5D%2C%22type%22:%22point%22%2C%22id%22:%2264415d24bfff91fb87ecee0bedee2432fc20220f%22%2C%22tagIds%22:%5B%5D%7D%2C%7B%22point%22:%5B98157%2C60665%2C1879%5D%2C%22type%22:%22point%22%2C%22id%22:%22db6147985b01a9b51a913f7ebe120053c09381ff%22%2C%22tagIds%22:%5B%5D%7D%2C%7B%22point%22:%5B98348%2C60768%2C1874%5D%2C%22type%22:%22point%22%2C%22id%22:%22ed026a8bf42b30f4f5a5ae26f5076f3e5a9ebc65%22%2C%22tagIds%22:%5B%5D%7D%2C%7B%22point%22:%5B99341%2C61428%2C1864%5D%2C%22type%22:%22point%22%2C%22id%22:%22c6dba10551dd845ab58d78b86cc653296f8a480f%22%2C%22tagIds%22:%5B%5D%7D%2C%7B%22point%22:%5B99204%2C61307%2C1859%5D%2C%22type%22:%22point%22%2C%22id%22:%22d60a57f86332218f83d6f6cb858cdf361605447%22%2C%22tagIds%22:%5B%5D%7D%2C%7B%22point%22:%5B103202%2C64170%2C1619%5D%2C%22type%22:%22point%22%2C%22id%22:%22c85b4467ecf564b093f7b8061d2cb2866d190104%22%2C%22tagIds%22:%5B%5D%7D%2C%7B%22point%22:%5B109514%2C70461%2C1517%5D%2C%22type%22:%22point%22%2C%22id%22:%229e53f12852cbca2378eca5a25ef6a0631661e5a4%22%2C%22tagIds%22:%5B%5D%7D%2C%7B%22point%22:%5B109884%2C70863%2C1523%5D%2C%22type%22:%22point%22%2C%22id%22:%22824922c21a9192a7314a7166574d98b8f8556c8c%22%2C%22tagIds%22:%5B%5D%7

D%2C%7B%22point%22:%5B109965%2C70932%2C1529%5D%2C%22type%22:%22point%22%2C%22id%22:%225bc33ef2933796a50254e0f06af8a8bd701f3228%22%2C%22tagIds%22:%5B%5D%7D%2C%7B%22point%22:%5B110213%2C71106%2C1536%5D%2C%22type%22:%22point%22%2C%22id%22:%22649f4f5103e0fbee20e07863d725defb12e63cdf%22%2C%22tagIds%22:%5B%5D%7D%2C%7B%22point%22:%5B111908%2C71077%2C1536%5D%2C%22type%22:%22point%22%2C%22id%22:%22e3dfd19f0d48171116e5ba14a86580d9a3c319ee%22%2C%22tagIds%22:%5B%5D%7D%2C%7B%22point%22:%5B111896%2C71042%2C1541%5D%2C%22type%22:%22point%22%2C%22id%22:%22e9ee75579679bb282002a027d273334b5280cfe6%22%2C%22tagIds%22:%5B%5D%7D%2C%7B%22point%22:%5B110269%2C71133%2C1541%5D%2C%22type%22:%22point%22%2C%22id%22:%22e8bc3e5adbd4ebac2af0396f4566fc192aabc88%22%2C%22tagIds%22:%5B%5D%7D%2C%7B%22point%22:%5B110423%2C71236%2C1546%5D%2C%22type%22:%22point%22%2C%22id%22:%22cf21a2e9f85762316e9f0fb4daabf0d2d17e142d%22%2C%22tagIds%22:%5B%5D%7D%2C%7B%22point%22:%5B111952%2C71077%2C1546%5D%2C%22type%22:%22point%22%2C%22id%22:%22c777f2bd1e3fe07dfa8e506e53dbe66b289d6ef3%22%2C%22tagIds%22:%5B%5D%7D%2C%7B%22point%22:%5B112050%2C71144%2C1553%5D%2C%22type%22:%22point%22%2C%22id%22:%22a6f1684a49dbd0ced6d1505c86f7d16a16362c23%22%2C%22tagIds%22:%5B%5D%7D%2C%7B%22point%22:%5B1110802%2C71500%2C1554%5D%2C%22type%22:%22point%22%2C%22id%22:%22cac9d4d653f13c82709331b17fdce95a7fa62f9e%22%2C%22tagIds%22:%5B%5D%7D%2C%7B%22point%22:%5B112009%2C71034%2C1567%5D%2C%22type%22:%22point%22%2C%22id%22:%2241ef7dee6ecfa38387f696f07b3c1af5a2a29f65%22%2C%22tagIds%22:%5B%5D%7D%2C%7B%22point%22:%5B112266%2C71252%2C1571%5D%2C%22type%22:%22point%22%2C%22id%22:%22a7a1080b8d2bc84248a67c6f6a113f18d1fb23bb%22%2C%22tagIds%22:%5B%5D%7D%2C%7B%22point%22:%5B112265%2C71230%2C1577%5D%2C%22type%22:%22point%22%2C%22id%22:%229aba2459a2226f69eff7569047866f5b86493ad9%22%2C%22tagIds%22:%5B%5D%7D%2C%7B%22point%22:%5B112328%2C71258%2C1583%5D%2C%22type%22:%22point%22%2C%22id%22:%22989a471b3232d55546a55ed3ec658be57cfa1dbb%22%2C%22tagIds%22:%5B%5D%7D%2C%7B%22point%22:%5B111397%2C71768%2C1583%5D%2C%22type%22:%22point%22%2C%22id%22:%22c5bdde26f22f910b95b2f5754e3f4799c39d630a%22%2C%22tagIds%22:%5B%5D%7D%2C%7B%22point%22:%5B111421%2C71797%2C1589%5D%2C%22type%22:%22point%22%2C%22id%22:%221a401373818374daa070beb8101c78e8dc9a184b%22%2C%22tagIds%22:%5B%5D%7D%2C%7B%22point%22:%5B112518%2C71405%2C1589%5D%2C%22type%22:%22point%22%2C%22id%22:%22d51dd3a63daa36befa6aaa07f92ca90126f5f15e%22%2C%22tagIds%22:%5B%5D%7D%2C%7B%22point%22:%5B112590%2C71474%2C1595%5D%2C%22type%22:%22point%22%2C%22id%22:%22385d55ab35ed6cd1778fd38e637c41619d3dedc%22%2C%22tagIds%22:%5B%5D%7D%2C%7B%22point%22:%5B111497%2C71839%2C1595%5D%2C%22type%22:%22point%22%2C%22id%22:%22441834d60b3488b8089a048fc90c0f2574debc1a%22%2C%22tagIds%22:%5B%5D%7D%2C%7B%22point%22:%5B112697%2C71563%2C1601%5D%2C%22type%22:%22point%22%2C%22id%22:%227330f5719c4052d94841598f4a96282c0e17fe5e%22%2C%22tagIds%22:%5B%5D%7D%2C%7B%22point%22:%5B111577%2C71887%2C1601%5D%2C%22type%22:%22point%22%2C%22id%22:%224fc87a46ffea3a4091aefc8bcec3e777f17ca72b%22%2C%22tagIds%22:%5B%5D%7D%2C%7B%22point%22:%5B111672%2C71935%2C1606%5D%2C%22type%22:%22point%22%2C%22id%22:%22f24ca5a01a765413d44bf3be56f106083afab239%22%2C%22tagIds%22:%5B%5D%7D%2C%7B%22point%22:%5B112828%2C71662%2C1611%5D%2C%22type%22:%22point%22%2C%22id%22:%22ff032162a1e982d39adff781de02911940a58651%22%2C%22tagIds%22:%5B%5D%7D%2C%7B%22point%22:%5B111736%2C71976%2C1616%5D%2C%22type%22:%22point%22%2C%22id%22:%229b99db66ca85a84ed5e1a6938bf530177a5c801f%22%2C%22tagIds%22:%5B%5D%7D%2C%7B%22point%22:%5B112936%2C71687%2C1616%5D%2C%22type

%22:%22point%22%2C%22id%22:%22be7b37c8dec290e5d2f6788b19bbe6b5ee6ad0ee%22%2C%22tagl  
ds%22:%5B%5D%7D%2C%7B%22point%22:%5B113027%2C71750%2C1621%5D%2C%22type%22:%22po  
int%22%2C%22id%22:%227979e945822c97886ac808040764caa6e38914f2%22%2C%22taglds%22:%5B  
%5D%7D%2C%7B%22point%22:%5B111811%2C72004%2C1621%5D%2C%22type%22:%22point%22%2C  
%22id%22:%227f3d30fbadb36d5cb1c45217ec03a6272075f7f4%22%2C%22taglds%22:%5B%5D%7D%2C  
%7B%22point%22:%5B113114%2C71845%2C1626%5D%2C%22type%22:%22point%22%2C%22id%22:%  
221811e19474a8e8c5e47846f42cd96cec53366445%22%2C%22taglds%22:%5B%5D%7D%2C%7B%22poi  
nt%22:%5B111946%2C72123%2C1626%5D%2C%22type%22:%22point%22%2C%22id%22:%22307eb701  
7e366e374b3f309bdfd8b33d0771b348%22%2C%22taglds%22:%5B%5D%7D%2C%7B%22point%22:%5B  
113224%2C71942%2C1631%5D%2C%22type%22:%22point%22%2C%22id%22:%228034ab6848a2d396c  
83b77a1a269c4d5531d1bb0%22%2C%22taglds%22:%5B%5D%7D%2C%7B%22point%22:%5B111953%2  
C72104%2C1631%5D%2C%22type%22:%22point%22%2C%22id%22:%2254288f9c31e02a0d756787ea79  
afeaf164999b75%22%2C%22taglds%22:%5B%5D%7D%2C%7B%22point%22:%5B112131%2C72255%2C1  
636%5D%2C%22type%22:%22point%22%2C%22id%22:%22e8ba5428084bc12abb96d378f4e46b2c9b71  
b21c%22%2C%22taglds%22:%5B%5D%7D%2C%7B%22point%22:%5B113327%2C72045%2C1636%5D%2  
C%22type%22:%22point%22%2C%22id%22:%2242e650481df76619b34fd38201a39e5fea33a801%22%2  
C%22taglds%22:%5B%5D%7D%2C%7B%22point%22:%5B112139%2C72227%2C1641%5D%2C%22type%  
22:%22point%22%2C%22id%22:%220ea266c09aea667d306bd9945c3467153a1692d9%22%2C%22tagld  
s%22:%5B%5D%7D%2C%7B%22point%22:%5B113375%2C72014%2C1646%5D%2C%22type%22:%22poi  
nt%22%2C%22id%22:%2271168820b5d2c8788ca24be7d30b53cf714eec9b%22%2C%22taglds%22:%5B%  
5D%7D%2C%7B%22point%22:%5B113386%2C72014%2C1651%5D%2C%22type%22:%22point%22%2C%  
22id%22:%2222a08f01fb002672c13a5b2662b2f2d96dd08a56%22%2C%22taglds%22:%5B%5D%7D%2C  
%7B%22point%22:%5B112364%2C72433%2C1651%5D%2C%22type%22:%22point%22%2C%22id%22:%  
22887f0e846abdb453b9a557a4e4fbf05c5974c8d7%22%2C%22taglds%22:%5B%5D%7D%2C%7B%22poi  
nt%22:%5B113433%2C72022%2C1656%5D%2C%22type%22:%22point%22%2C%22id%22:%22228e27e3  
900f6bec45e47c4081d55a60a6e9f35e%22%2C%22taglds%22:%5B%5D%7D%2C%7B%22point%22:%5B1  
12463%2C72497%2C1656%5D%2C%22type%22:%22point%22%2C%22id%22:%224b89740f9ec3651dd3  
5dd08ff6b075c30be08cfc%22%2C%22taglds%22:%5B%5D%7D%2C%7B%22point%22:%5B113503%2C72  
127%2C1661%5D%2C%22type%22:%22point%22%2C%22id%22:%22f6a18a470d6b94b6e383cf35164f6e  
726e72abe3%22%2C%22taglds%22:%5B%5D%7D%2C%7B%22point%22:%5B112557%2C72578%2C1661  
%5D%2C%22type%22:%22point%22%2C%22id%22:%2271677f5a114be7bec3608f7109f0eb78b0958bc4  
%22%2C%22taglds%22:%5B%5D%7D%2C%7B%22point%22:%5B113548%2C72148%2C1666%5D%2C%2  
2type%22:%22point%22%2C%22id%22:%22e035b6b5fef63d531fdf14f5d1de538e1b342606%22%2C%22  
taglds%22:%5B%5D%7D%2C%7B%22point%22:%5B112605%2C72619%2C1666%5D%2C%22type%22:%2  
2point%22%2C%22id%22:%22773d403dce21b4a5abacbf499ce45e54dd44795e%22%2C%22taglds%22:  
%5B%5D%7D%2C%7B%22point%22:%5B113639%2C72199%2C1674%5D%2C%22type%22:%22point%22  
%2C%22id%22:%22366dd73fc0319c1918708f5244efe1b9dbd5994f%22%2C%22taglds%22:%5B%5D%7D  
%2C%7B%22point%22:%5B112863%2C72789%2C1674%5D%2C%22type%22:%22point%22%2C%22id%2  
2:%225665d4aab751867384b59441f942d227c11809dd%22%2C%22taglds%22:%5B%5D%7D%2C%7B%2  
2point%22:%5B112913%2C72827%2C1681%5D%2C%22type%22:%22point%22%2C%22id%22:%2253c7  
cac25507524fae6b0e6f9b5aaebfa3afd680%22%2C%22taglds%22:%5B%5D%7D%2C%7B%22point%22:%  
5B113812%2C72344%2C1687%5D%2C%22type%22:%22point%22%2C%22id%22:%225b77a43ca5ae316  
8335072c483bd3d3caf76b15e%22%2C%22taglds%22:%5B%5D%7D%2C%7B%22point%22:%5B112897%  
2C72827%2C1687%5D%2C%22type%22:%22point%22%2C%22id%22:%225d880e1dc730160b580b5ae4

900a2468bee740f5%22%2C%22tagIds%22:%5B%5D%7D%2C%7B%22point%22:%5B113138%2C72971%  
2C1698%5D%2C%22type%22:%22point%22%2C%22id%22:%22fa6af9b494db297d84b72a8047f26a0347  
63090e%22%2C%22tagIds%22:%5B%5D%7D%2C%7B%22point%22:%5B113961%2C72460%2C1698%5D  
%2C%22type%22:%22point%22%2C%22id%22:%22660de646251b9c212b8bc49be85182d13566df79%2  
2%2C%22tagIds%22:%5B%5D%7D%2C%7B%22point%22:%5B113134%2C72970%2C1704%5D%2C%22ty  
pe%22:%22point%22%2C%22id%22:%22d55d75e3beb1d7acfd081623ac913a5cb8060687%22%2C%22ta  
glds%22:%5B%5D%7D%2C%7B%22point%22:%5B113967%2C72452%2C1704%5D%2C%22type%22:%22  
point%22%2C%22id%22:%22b11fef82ca98f6051a52c4e1af1a027549e2e2cc%22%2C%22tagIds%22:%5B  
%5D%7D%2C%7B%22point%22:%5B114058%2C72555%2C1711%5D%2C%22type%22:%22point%22%2C  
%22id%22:%22b3c80b64d461da47b0dd280efe553d8855376f6a%22%2C%22tagIds%22:%5B%5D%7D%2  
C%7B%22point%22:%5B114117%2C72608%2C1716%5D%2C%22type%22:%22point%22%2C%22id%22:  
%2210768c41252e43bad0398ce1a0b65e441447b9ff%22%2C%22tagIds%22:%5B%5D%7D%2C%7B%22p  
oint%22:%5B113182%2C73036%2C1716%5D%2C%22type%22:%22point%22%2C%22id%22:%226a388e  
3b5180d98491c5a500866d4cfde0ca2b7d%22%2C%22tagIds%22:%5B%5D%7D%2C%7B%22point%22:%5  
B114177%2C72661%2C1722%5D%2C%22type%22:%22point%22%2C%22id%22:%22e1827d7ed83a3235  
d3cfa5919a60a23f995735bc%22%2C%22tagIds%22:%5B%5D%7D%2C%7B%22point%22:%5B113207%2  
C73057%2C1722%5D%2C%22type%22:%22point%22%2C%22id%22:%224b3192c7775541a2ef9c70af16  
9123d3d4d76d8c%22%2C%22tagIds%22:%5B%5D%7D%2C%7B%22point%22:%5B113235%2C73076%2C  
1728%5D%2C%22type%22:%22point%22%2C%22id%22:%229546c484c82251b975490de4bcbe2093140  
b3da9%22%2C%22tagIds%22:%5B%5D%7D%2C%7B%22point%22:%5B114233%2C72699%2C1728%5D%  
2C%22type%22:%22point%22%2C%22id%22:%22a824fa10807d2aa0e72c3fa7f69bd23f0d11ae02%22%2  
C%22tagIds%22:%5B%5D%7D%2C%7B%22point%22:%5B113272%2C73110%2C1733%5D%2C%22type%  
22:%22point%22%2C%22id%22:%221ebdc60671916bc02e48ff8762f4871261214177%22%2C%22tagIds  
%22:%5B%5D%7D%2C%7B%22point%22:%5B114401%2C72896%2C1737%5D%2C%22type%22:%22poin  
t%22%2C%22id%22:%2298add8ea7b4801f123cc01c2ffebf221f4bc75a4%22%2C%22tagIds%22:%5B%5D  
%7D%2C%7B%22point%22:%5B113446%2C73212%2C1742%5D%2C%22type%22:%22point%22%2C%22i  
d%22:%22026975dbcc2908af4670f12f0940b58cfc5fe813%22%2C%22tagIds%22:%5B%5D%7D%2C%7B%  
22point%22:%5B114523%2C73014%2C1747%5D%2C%22type%22:%22point%22%2C%22id%22:%220e0  
4b9ea89ae3fbed07e4ee00b9b6aa858fc1192%22%2C%22tagIds%22:%5B%5D%7D%2C%7B%22point%22  
:%5B113414%2C73197%2C1752%5D%2C%22type%22:%22point%22%2C%22id%22:%228a92832e7c86c  
9c63468185e9f56b304ca1820e5%22%2C%22tagIds%22:%5B%5D%7D%2C%7B%22point%22:%5B11462  
2%2C73106%2C1752%5D%2C%22type%22:%22point%22%2C%22id%22:%229005c2e78f28c76dd59602  
765a3ada1a3faa76d7%22%2C%22tagIds%22:%5B%5D%7D%2C%7B%22point%22:%5B113584%2C73317  
%2C1757%5D%2C%22type%22:%22point%22%2C%22id%22:%22927a26133294d21c41f0ac47e2741616  
90ed32bb%22%2C%22tagIds%22:%5B%5D%7D%2C%7B%22point%22:%5B114645%2C73111%2C1757%  
5D%2C%22type%22:%22point%22%2C%22id%22:%226412b7298ab3928a6213b68b308cb4b13f883203  
%22%2C%22tagIds%22:%5B%5D%7D%2C%7B%22point%22:%5B113623%2C73340%2C1762%5D%2C%2  
2type%22:%22point%22%2C%22id%22:%22259b6215d9c3983e71c02df43ba8020ba7522387%22%2C%2  
2tagIds%22:%5B%5D%7D%2C%7B%22point%22:%5B114704%2C73182%2C1762%5D%2C%22type%22:%  
22point%22%2C%22id%22:%22ae7a76c55ea5ac78aa8b96cf8f8e0bbc972fd16d%22%2C%22tagIds%22:%  
5B%5D%7D%2C%7B%22point%22:%5B114767%2C73210%2C1769%5D%2C%22type%22:%22point%22%  
2C%22id%22:%22f9da7f9c6af3ea3e661c6ffed4a4aed7708b444a%22%2C%22tagIds%22:%5B%5D%7D%2  
C%7B%22point%22:%5B113797%2C73455%2C1769%5D%2C%22type%22:%22point%22%2C%22id%22:  
%2214cd02fdadc831384a9027112e0e754261b4d26a%22%2C%22tagIds%22:%5B%5D%7D%2C%7B%22p

oint%22:%5B114973%2C73507%2C1786%5D%2C%22type%22:%22point%22%2C%22id%22:%221e9ce68495b248c60256227ff4a9a90e80777155%22%2C%22tagIds%22:%5B%5D%7D%2C%7B%22point%22:%5B114997%2C73460%2C1791%5D%2C%22type%22:%22point%22%2C%22id%22:%2248ee407726853ee411c58dca1dabe9caa3517c2f%22%2C%22tagIds%22:%5B%5D%7D%2C%7B%22point%22:%5B115189%2C73545%2C1805%5D%2C%22type%22:%22point%22%2C%22id%22:%22e9a3fd570a7b5d4adba6db081e7d8b345e5cb42d%22%2C%22tagIds%22:%5B%5D%7D%2C%7B%22point%22:%5B77447%2C67972%2C593%5D%2C%22type%22:%22point%22%2C%22id%22:%2225d65af870c449fa1371bba47c442285f307395e%22%2C%22tagIds%22:%5B%5D%7D%2C%7B%22point%22:%5B78065%2C64405%2C594%5D%2C%22type%22:%22point%22%2C%22id%22:%22e425b1c190ec140f4f6cf96a3f46eb93a523e5bd%22%2C%22tagIds%22:%5B%5D%7D%2C%7B%22point%22:%5B77521%2C67797%2C588%5D%2C%22type%22:%22point%22%2C%22id%22:%2238ae80d6380b7510d19daab7407835006a0451f0%22%2C%22tagIds%22:%5B%5D%7D%2C%7B%22point%22:%5B78035%2C64409%2C589%5D%2C%22type%22:%22point%22%2C%22id%22:%22658ff60f434dd902f12b90aff03db0deda6b20f7%22%2C%22tagIds%22:%5B%5D%7D%2C%7B%22point%22:%5B77701%2C67353%2C578%5D%2C%22type%22:%22point%22%2C%22id%22:%22aa5503b3296f3ef8d9a0a9841706468640303d94%22%2C%22tagIds%22:%5B%5D%7D%2C%7B%22point%22:%5B77608%2C64545%2C578%5D%2C%22type%22:%22point%22%2C%22id%22:%22553eb741323609214b5e2ccaf3eba487ab523c8d%22%2C%22tagIds%22:%5B%5D%7D%2C%7B%22point%22:%5B77587%2C64741%2C584%5D%2C%22type%22:%22point%22%2C%22id%22:%223c4a63b5026dca7a8db0c6ee7ed5d26bd4b5fa22%22%2C%22tagIds%22:%5B%5D%7D%2C%7B%22point%22:%5B77493%2C67797%2C584%5D%2C%22type%22:%22point%22%2C%22id%22:%22e88596f66e6281523d6969a543d3df9043c214b0%22%2C%22tagIds%22:%5B%5D%7D%2C%7B%22point%22:%5B77797%2C67039%2C567%5D%2C%22type%22:%22point%22%2C%22id%22:%22bfa0cf426e7968cb2642b4274e9299008a05a198%22%2C%22tagIds%22:%5B%5D%7D%2C%7B%22point%22:%5B77739%2C66783%2C552%5D%2C%22type%22:%22point%22%2C%22id%22:%22d3117586a06c73961810c4232d07874bb2874683%22%2C%22tagIds%22:%5B%5D%7D%2C%7B%22point%22:%5B77431%2C68170%2C609%5D%2C%22type%22:%22point%22%2C%22id%22:%2285918404dc622a8431a69122dd7ce4d6bb538b24%22%2C%22tagIds%22:%5B%5D%7D%2C%7B%22point%22:%5B77418%2C68112%2C603%5D%2C%22type%22:%22point%22%2C%22id%22:%229c0117ccee8baa69f86dbf3e9cdc5ad2251e839%22%2C%22tagIds%22:%5B%5D%7D%2C%7B%22point%22:%5B77350%2C68357%2C639%5D%2C%22type%22:%22point%22%2C%22id%22:%22c02a2f9059bcf1a3244c610c0b403a087af918a0%22%2C%22tagIds%22:%5B%5D%7D%2C%7B%22point%22:%5B77307%2C68381%2C646%5D%2C%22type%22:%22point%22%2C%22id%22:%2230233b82344b8fb34d9369edc6f5891cfaa4dd6b%22%2C%22tagIds%22:%5B%5D%7D%2C%7B%22point%22:%5B77171%2C68334%2C671%5D%2C%22type%22:%22point%22%2C%22id%22:%22d7afe90e5f70c4e46cc1add801f5a8b890b8c488%22%2C%22tagIds%22:%5B%5D%7D%2C%7B%22point%22:%5B76684%2C69198%2C711%5D%2C%22type%22:%22point%22%2C%22id%22:%22386f2aef07c389a2df910907893683183fcd77c8%22%2C%22tagIds%22:%5B%5D%7D%2C%7B%22point%22:%5B76642%2C69338%2C717%5D%2C%22type%22:%22point%22%2C%22id%22:%222002dd1ad9be9adb003b14e34553804b127fce2b%22%2C%22tagIds%22:%5B%5D%7D%2C%7B%22point%22:%5B76539%2C69531%2C722%5D%2C%22type%22:%22point%22%2C%22id%22:%220dc7011cf090938cdf4580a4adc72e5bbddc9a76%22%2C%22tagIds%22:%5B%5D%7D%2C%7B%22point%22:%5B76385%2C69779%2C728%5D%2C%22type%22:%22point%22%2C%22id%22:%2206ac8b17646cd144e6371a7e984274366dc91c3d%22%2C%22tagIds%22:%5B%5D%7D%2C%7B%22point%22:%5B76034%2C73916%2C728%5D%2C%22type%22:%22point%22%2C%22id%22:%22c45e03d3b2f8f985e50816a0eba574e38d890c27%22%2C%22tagIds%22:%5B%5D%7D%2C%7B%22point%22:%5B75777%2C73802%2C739%5D%2C%22type%22:%22point%22%2C%22id%22:%22dd3eb1635446d34

13a3dd4f184343536592ebad1%22%2C%22tagIds%22:%5B%5D%7D%2C%7B%22point%22:%5B76274%2C69969%2C739%5D%2C%22type%22:%22point%22%2C%22id%22:%22b9c9d90f5d247e66b6badaf1c7bfc459e0a8031f%22%2C%22tagIds%22:%5B%5D%7D%2C%7B%22point%22:%5B76211%2C70113%2C746%5D%2C%22type%22:%22point%22%2C%22id%22:%226405a0130059ec58c239f4a9976a8d60005b04c5%22%2C%22tagIds%22:%5B%5D%7D%2C%7B%22point%22:%5B76197%2C70212%2C752%5D%2C%22type%22:%22point%22%2C%22id%22:%22d52aa55daa7c0fb5f155a4dbb2776fd1533d1770%22%2C%22tagIds%22:%5B%5D%7D%2C%7B%22point%22:%5B75174%2C73940%2C752%5D%2C%22type%22:%22point%22%2C%22id%22:%225ec22665ad8110337750750cc0424c50cfc0c6a6%22%2C%22tagIds%22:%5B%5D%7D%2C%7B%22point%22:%5B76127%2C70281%2C759%5D%2C%22type%22:%22point%22%2C%22id%22:%229d39912b67f5e184441b9d48c6a36e975548824%22%2C%22tagIds%22:%5B%5D%7D%2C%7B%22point%22:%5B76071%2C70425%2C764%5D%2C%22type%22:%22point%22%2C%22id%22:%22fd74c8a2ac0cef91c0e493f8189198167fad66c3%22%2C%22tagIds%22:%5B%5D%7D%2C%7B%22point%22:%5B74770%2C73709%2C764%5D%2C%22type%22:%22point%22%2C%22id%22:%224fc54cc3413b6b29effe932216fe1511b83bb035%22%2C%22tagIds%22:%5B%5D%7D%2C%7B%22point%22:%5B74310%2C73295%2C779%5D%2C%22type%22:%22point%22%2C%22id%22:%229ec3334613e754fca86df8c328783be2c4b780ac%22%2C%22tagIds%22:%5B%5D%7D%2C%7B%22point%22:%5B75808%2C70856%2C785%5D%2C%22type%22:%22point%22%2C%22id%22:%228c7252d5d4c2c742eb4475168bc543ba38eaf106%22%2C%22tagIds%22:%5B%5D%7D%2C%7B%22point%22:%5B74000%2C72712%2C790%5D%2C%22type%22:%22point%22%2C%22id%22:%22a96b8b3113d5096ee760d14b1209324f724109b5%22%2C%22tagIds%22:%5B%5D%7D%2C%7B%22point%22:%5B73876%2C72322%2C798%5D%2C%22type%22:%22point%22%2C%22id%22:%22bd0688dd742b17096b49c64d4928d9d3d384bfda%22%2C%22tagIds%22:%5B%5D%7D%2C%7B%22point%22:%5B75687%2C70922%2C798%5D%2C%22type%22:%22point%22%2C%22id%22:%2211057dce0dc45c59110d9676b8e3213d31c7820c%22%2C%22tagIds%22:%5B%5D%7D%2C%7B%22point%22:%5B75647%2C71039%2C803%5D%2C%22type%22:%22point%22%2C%22id%22:%2243f7484a841e8c06568e96b9dfa9994d34e4dc5b%22%2C%22tagIds%22:%5B%5D%7D%2C%7B%22point%22:%5B73876%2C72275%2C803%5D%2C%22type%22:%22point%22%2C%22id%22:%226eb83196734a19aaefe38bb25f43b33652adb21a%22%2C%22tagIds%22:%5B%5D%7D%2C%7B%22point%22:%5B75577%2C71149%2C809%5D%2C%22type%22:%22point%22%2C%22id%22:%22cd8f58955cc50fda30785bee174ad677c0a46828%22%2C%22tagIds%22:%5B%5D%7D%2C%7B%22point%22:%5B73899%2C71985%2C809%5D%2C%22type%22:%22point%22%2C%22id%22:%22023624b13bbe4dab5025640c3c2f44c29e9b912d%22%2C%22tagIds%22:%5B%5D%7D%2C%7B%22point%22:%5B75531%2C71224%2C814%5D%2C%22type%22:%22point%22%2C%22id%22:%22e03e9e79e24f8ec887dfabf59cd1780d250dfe78%22%2C%22tagIds%22:%5B%5D%7D%2C%7B%22point%22:%5B73927%2C71897%2C814%5D%2C%22type%22:%22point%22%2C%22id%22:%22d35956d257f8b6a47ddf15f98d6d7e6bfe8b52b8%22%2C%22tagIds%22:%5B%5D%7D%2C%7B%22point%22:%5B75456%2C71330%2C820%5D%2C%22type%22:%22point%22%2C%22id%22:%2275d0f53e3a60ed6a6d58662e1a762ff24ade8f0e%22%2C%22tagIds%22:%5B%5D%7D%2C%7B%22point%22:%5B75398%2C71409%2C825%5D%2C%22type%22:%22point%22%2C%22id%22:%222f2f49440ff0c78ae57ac16a1b21e4133b265af17%22%2C%22tagIds%22:%5B%5D%7D%2C%7B%22point%22:%5B75324%2C71456%2C830%5D%2C%22type%22:%22point%22%2C%22id%22:%22a3f94f1e75dd522c702e81e9dec4282a9b2d5214%22%2C%22tagIds%22:%5B%5D%7D%2C%7B%22point%22:%5B75287%2C71610%2C835%5D%2C%22type%22:%22point%22%2C%22id%22:%22e56542894ea5ab77cd359df1c3b828ec43c3c987%22%2C%22tagIds%22:%5B%5D%7D%2C%7B%22point%22:%5B75202%2C71662%2C840%5D%2C%22type%22:%22point%22%2C%22id%22:%22ba8cc3a5d1a58e1bc24478a0a09307f58f6b28fd%22%2C%22tagIds%22:%5B%5D%7D%2C%7B%22point%22:%5B75091%2C71736%2C845%5D%2

C%22type%22:%22point%22%2C%22id%22:%2255f79ec5e698e65ddedb5e5aa39e7facbb252%22%2C%22tagIds%22:%22%5B%5D%7D%2C%7B%22point%22:%22%5B92465%2C52076%2C634%5D%2C%22type%22:%22point%22%2C%22id%22:%22e4d95e1c61cd49e6121289b13935a672bd3e6420%22%2C%22tagIds%22:%22%5B%5D%7D%2C%7B%22point%22:%22%5B93700%2C53154%2C634%5D%2C%22type%22:%22point%22%2C%22id%22:%22ac4199b4f5a1f5c809af1509612d80f5d82e0f64%22%2C%22tagIds%22:%22%5B%5D%7D%2C%7B%22point%22:%22%5B92517%2C52139%2C629%5D%2C%22type%22:%22point%22%2C%22id%22:%2223618bd3fa1adf0146b6550491df9edb6eb424946%22%2C%22tagIds%22:%22%5B%5D%7D%2C%7B%22point%22:%22%5B93768%2C53163%2C629%5D%2C%22type%22:%22point%22%2C%22id%22:%22c47b655fb899dee4aa4fe464e9e948dee439fd8c%22%2C%22tagIds%22:%22%5B%5D%7D%2C%7B%22point%22:%22%5B92578%2C52264%2C614%5D%2C%22type%22:%22point%22%2C%22id%22:%223f84d0b1a0fa7962e41675f7c9f62710c5f533a0%22%2C%22tagIds%22:%22%5B%5D%7D%2C%7B%22point%22:%22%5B92636%2C52555%2C609%5D%2C%22type%22:%22point%22%2C%22id%22:%22742aa3819b4f708d95990e78f38e74b2f45d87a8%22%2C%22tagIds%22:%22%5B%5D%7D%2C%7B%22point%22:%22%5B94020%2C53415%2C604%5D%2C%22type%22:%22point%22%2C%22id%22:%22263ec7db88004bc3a573406c1190d81ae55819e2f%22%2C%22tagIds%22:%22%5B%5D%7D%2C%7B%22point%22:%22%5B92663%2C52576%2C604%5D%2C%22type%22:%22point%22%2C%22id%22:%22d0871fbd027268aa3c78bab49247bb78e6e3a3c6%22%2C%22tagIds%22:%22%5B%5D%7D%2C%7B%22point%22:%22%5B92646%2C52781%2C599%5D%2C%22type%22:%22point%22%2C%22id%22:%22e01b9aabd6705bf05c156f13728a9e60b950589d%22%2C%22tagIds%22:%22%5B%5D%7D%2C%7B%22point%22:%22%5B94061%2C53441%2C599%5D%2C%22type%22:%22point%22%2C%22id%22:%2223928d7ee1d7d98e30db296d30d898f99470ac4d2%22%2C%22tagIds%22:%22%5B%5D%7D%2C%7B%22point%22:%22%5B94103%2C53489%2C593%5D%2C%22type%22:%22point%22%2C%22id%22:%22aa7818f385912a585cfd3c6a21db25a4666f8af3%22%2C%22tagIds%22:%22%5B%5D%7D%2C%7B%22point%22:%22%5B92746%2C52760%2C593%5D%2C%22type%22:%22point%22%2C%22id%22:%22bd6068fe15713a3067cfb12367397f5eeab1744c%22%2C%22tagIds%22:%22%5B%5D%7D%2C%7B%22point%22:%22%5B94121%2C53480%2C588%5D%2C%22type%22:%22point%22%2C%22id%22:%225cea5d9566784895d4147efbe03aca32ea0c7afe%22%2C%22tagIds%22:%22%5B%5D%7D%2C%7B%22point%22:%22%5B92748%2C52841%2C588%5D%2C%22type%22:%22point%22%2C%22id%22:%22d857c0308b634e3ecd530ba39dc587f950084e72%22%2C%22tagIds%22:%22%5B%5D%7D%2C%7B%22point%22:%22%5B94152%2C53496%2C583%5D%2C%22type%22:%22point%22%2C%22id%22:%22af3d50fe2f268f064472ac335ce8c6411af590e6%22%2C%22tagIds%22:%22%5B%5D%7D%2C%7B%22point%22:%22%5B92764%2C52936%2C583%5D%2C%22type%22:%22point%22%2C%22id%22:%22b896af017795f06f35c597161a2419c57bef628e%22%2C%22tagIds%22:%22%5B%5D%7D%2C%7B%22point%22:%22%5B94187%2C53499%2C578%5D%2C%22type%22:%22point%22%2C%22id%22:%2274746dff04626efcb72b7ad381dd5736f1dd664%22%2C%22tagIds%22:%22%5B%5D%7D%2C%7B%22point%22:%22%5B92777%2C52976%2C578%5D%2C%22type%22:%22point%22%2C%22id%22:%22f0333f0d99074159d9692f4fab349913805d3c98%22%2C%22tagIds%22:%22%5B%5D%7D%2C%7B%22point%22:%22%5B92791%2C53054%2C573%5D%2C%22type%22:%22point%22%2C%22id%22:%22ef42c80243c0a03404634263df0d504355e2cd72%22%2C%22tagIds%22:%22%5B%5D%7D%2C%7B%22point%22:%22%5B94187%2C53499%2C578%5D%2C%22type%22:%22point%22%2C%22id%22:%2211f8fd48432bcd6ff1a2e4e7c1ae2db80561d47e%22%2C%22tagIds%22:%22%5B%5D%7D%2C%7B%22point%22:%22%5B94206%2C53514%2C573%5D%2C%22type%22:%22point%22%2C%22id%22:%22a6adb46c58c6ea9aba3375892856663dc3b43ca2%22%2C%22tagIds%22:%22%5B%5D%7D%2C%7B%22point%22:%22%5B92801%2C53196%2C568%5D%2C%22type%22:%22point%22%2C%22id%22:%22f8d98a1b8727bfda282e0742b09617327ddcfd4b%22%2C%22tagIds%22:%22%5B%5D%7D%2C%7B%22point%22:%22%5B94206%2C53514%2C573%5D%2C%22type%22:%22point%22%2C%22id%22:%22fc5935fc3e26baf7ab86c3aa526afc3fc9ff5338%22%2C%22tagIds%22:%22%5B%5D

%7D%2C%7B%22point%22:%5B94206%2C53514%2C573%5D%2C%22type%22:%22point%22%2C%22id%22:%22dc8d9570b6cecb42b22fb4d5e3780c202cc59e72%22%2C%22tagIds%22:%5B%5D%7D%2C%7B%22point%22:%5B92833%2C53257%2C563%5D%2C%22type%22:%22point%22%2C%22id%22:%22840fa941bc307691a105b8cb71fc2d50c9a5ef90%22%2C%22tagIds%22:%5B%5D%7D%2C%7B%22point%22:%5B94233%2C53563%2C563%5D%2C%22type%22:%22point%22%2C%22id%22:%22b41abbb6253f6d5581480d939d5a30d5adc83d3f%22%2C%22tagIds%22:%5B%5D%7D%2C%7B%22point%22:%5B92881%2C53320%2C558%5D%2C%22type%22:%22point%22%2C%22id%22:%2209809445fb6a78c8444f54d5ab48bb0afdd3bc33%22%2C%22tagIds%22:%5B%5D%7D%2C%7B%22point%22:%5B94233%2C53563%2C563%5D%2C%22type%22:%22point%22%2C%22id%22:%222764f3791c21f8f8d357d84164187322a3153876%22%2C%22tagIds%22:%5B%5D%7D%2C%7B%22point%22:%5B94278%2C53615%2C553%5D%2C%22type%22:%22point%22%2C%22id%22:%22e85f1bfa99837cf218ae6d4ba0762b2b5a5bc8ef%22%2C%22tagIds%22:%5B%5D%7D%2C%7B%22point%22:%5B92894%2C53367%2C553%5D%2C%22type%22:%22point%22%2C%22id%22:%22e9c9dc5008c2a94f4fc6c214cc597cb0237e31d7%22%2C%22tagIds%22:%5B%5D%7D%2C%7B%22point%22:%5B92926%2C53468%2C546%5D%2C%22type%22:%22point%22%2C%22id%22:%22df74acde2182afc0efdc448fd4f445810432edaa%22%2C%22tagIds%22:%5B%5D%7D%2C%7B%22point%22:%5B92942%2C53489%2C541%5D%2C%22type%22:%22point%22%2C%22id%22:%22815ad25783fb65dd9487cae180fd401f49e0387e%22%2C%22tagIds%22:%5B%5D%7D%2C%7B%22point%22:%5B92979%2C53557%2C535%5D%2C%22type%22:%22point%22%2C%22id%22:%22e5d4a3ca2129c8b0646dd52783fd64b001afb45c%22%2C%22tagIds%22:%5B%5D%7D%2C%7B%22point%22:%5B94325%2C53679%2C535%5D%2C%22type%22:%22point%22%2C%22id%22:%2251fa6f4a4261e9aadcb011f8465f16c18ea04c60%22%2C%22tagIds%22:%5B%5D%7D%2C%7B%22point%22:%5B94347%2C53710%2C529%5D%2C%22type%22:%22point%22%2C%22id%22:%2261cea8061632b8f5a678237482ac76bbdfa2f0c8%22%2C%22tagIds%22:%5B%5D%7D%2C%7B%22point%22:%5B92989%2C53621%2C529%5D%2C%22type%22:%22point%22%2C%22id%22:%22d4f3e56ae8319034458c406bcc0a929c7aace55%22%2C%22tagIds%22:%5B%5D%7D%2C%7B%22point%22:%5B94352%2C53753%2C524%5D%2C%22type%22:%22point%22%2C%22id%22:%22feb5bc9fdda71652bc48262fc2b40f0aca1c03c6%22%2C%22tagIds%22:%5B%5D%7D%2C%7B%22point%22:%5B93005%2C53679%2C524%5D%2C%22type%22:%22point%22%2C%22id%22:%223fd7dcb6bfc15bab39c9d7069bf3ddec5e74e0a6%22%2C%22tagIds%22:%5B%5D%7D%2C%7B%22point%22:%5B94373%2C53811%2C519%5D%2C%22type%22:%22point%22%2C%22id%22:%227f354df02b90a382074bba70f84a7f08d4f7010d%22%2C%22tagIds%22:%5B%5D%7D%2C%7B%22point%22:%5B93005%2C53679%2C524%5D%2C%22type%22:%22point%22%2C%22id%22:%223191b60c24f1e2ccbe44208a3e8405863c78ce77%22%2C%22tagIds%22:%5B%5D%7D%2C%7B%22point%22:%5B93021%2C53658%2C519%5D%2C%22type%22:%22point%22%2C%22id%22:%2278481ba4126d1e6782397e0b6b108753b5051253%22%2C%22tagIds%22:%5B%5D%7D%2C%7B%22point%22:%5B94373%2C53811%2C519%5D%2C%22type%22:%22point%22%2C%22id%22:%22cec82f755fb22381f7e9cd67c4b36454db93ea63%22%2C%22tagIds%22:%5B%5D%7D%2C%7B%22point%22:%5B94379%2C53840%2C514%5D%2C%22type%22:%22point%22%2C%22id%22:%2250a125f4a59f5c728cee3a62549d1f5a89d192dd%22%2C%22tagIds%22:%5B%5D%7D%2C%7B%22point%22:%5B93033%2C53692%2C514%5D%2C%22type%22:%22point%22%2C%22id%22:%228aaf29d4031a93a3f3ead8c683f370ccbd27cd3a%22%2C%22tagIds%22:%5B%5D%7D%2C%7B%22point%22:%5B94384%2C53851%2C508%5D%2C%22type%22:%22point%22%2C%22id%22:%223b32ceaa17eb5be28eda0f30cd4660da0b3d9f86%22%2C%22tagIds%22:%5B%5D%7D%2C%7B%22point%22:%5B93016%2C53787%2C508%5D%2C%22type%22:%22point%22%2C%22id%22:%222ac32cb9632722cee1f82d3826eb7be6c9dc9044%22%2C%22tagIds%22:%5B%5D%7D%2C%7B%22point%22:%5B94395%2C53877%2C503%5D%2C%22type%22:%22point%22%2C%22id%22:%228d911fd289cb2ab1

2f4ac9898f209527fde2a081%22%2C%22tagIds%22:%5B%5D%7D%2C%7B%22point%22:%5B93038%2C53782%2C503%5D%2C%22type%22:%22point%22%2C%22id%22:%22293dd8f6dd52257e48d97253830d2e075fbc31eb%22%2C%22tagIds%22:%5B%5D%7D%2C%7B%22point%22:%5B94400%2C53919%2C498%5D%2C%22type%22:%22point%22%2C%22id%22:%222b0d0636b7f0d96354873d65546c731a42ada7a5%22%2C%22tagIds%22:%5B%5D%7D%2C%7B%22point%22:%5B93038%2C53835%2C498%5D%2C%22type%22:%22point%22%2C%22id%22:%222b44bfc3d9627639ec47c8b9a3feb5fa9028eb0c%22%2C%22tagIds%22:%5B%5D%7D%2C%7B%22point%22:%5B94405%2C53951%2C492%5D%2C%22type%22:%22point%22%2C%22id%22:%22afb971b49ed60b36d44a52d837000deabfa81c7d%22%2C%22tagIds%22:%5B%5D%7D%2C%7B%22point%22:%5B93059%2C53845%2C492%5D%2C%22type%22:%22point%22%2C%22id%22:%2226fa5ee87876e8185e521d18a502c3f267963a9e4%22%2C%22tagIds%22:%5B%5D%7D%2C%7B%22point%22:%5B93069%2C53877%2C487%5D%2C%22type%22:%22point%22%2C%22id%22:%2225face37317f4b9818799518841615281e725e459%22%2C%22tagIds%22:%5B%5D%7D%2C%7B%22point%22:%5B94409%2C53946%2C485%5D%2C%22type%22:%22point%22%2C%22id%22:%22ca30859efac7115009f00c41977d82c03e040269%22%2C%22tagIds%22:%5B%5D%7D%2C%7B%22point%22:%5B94409%2C53993%2C475%5D%2C%22type%22:%22point%22%2C%22id%22:%22eebaae269a17e99deb8f2066870cce20f15f9413%22%2C%22tagIds%22:%5B%5D%7D%2C%7B%22point%22:%5B93078%2C53909%2C475%5D%2C%22type%22:%22point%22%2C%22id%22:%22435b216f1fcec4ce14a328ee0009c9e38ad3fdb0%22%2C%22tagIds%22:%5B%5D%7D%2C%7B%22point%22:%5B94409%2C54052%2C469%5D%2C%22type%22:%22point%22%2C%22id%22:%221f23bc46e8618f3ca531549de983144adde58004%22%2C%22tagIds%22:%5B%5D%7D%2C%7B%22point%22:%5B93073%2C53951%2C469%5D%2C%22type%22:%22point%22%2C%22id%22:%227ca8f1a12180f08a30b6b0b63d0780dc04643ebf%22%2C%22tagIds%22:%5B%5D%7D%2C%7B%22point%22:%5B94404%2C54057%2C463%5D%2C%22type%22:%22point%22%2C%22id%22:%221149e51a18a83855f3fffc892f4934cb6e529471%22%2C%22tagIds%22:%5B%5D%7D%2C%7B%22point%22:%5B93089%2C53957%2C463%5D%2C%22type%22:%22point%22%2C%22id%22:%221dd5b244bb0226a05820d6f8027b618ff04f829b%22%2C%22tagIds%22:%5B%5D%7D%2C%7B%22point%22:%5B94413%2C54181%2C455%5D%2C%22type%22:%22point%22%2C%22id%22:%22802bc2064686b4986b9a76dcc7516ba5f6723eeb%22%2C%22tagIds%22:%5B%5D%7D%2C%7B%22point%22:%5B93082%2C53990%2C455%5D%2C%22type%22:%22point%22%2C%22id%22:%22c7791489bf2f4a93069d557261d720b24cfe9f69%22%2C%22tagIds%22:%5B%5D%7D%2C%7B%22point%22:%5B93077%2C54022%2C447%5D%2C%22type%22:%22point%22%2C%22id%22:%223338e0ef27004ded52c9f7588a2088ec7d6e8fea%22%2C%22tagIds%22:%5B%5D%7D%2C%7B%22point%22:%5B94381%2C54191%2C447%5D%2C%22type%22:%22point%22%2C%22id%22:%228066ba0c82db172293c587c0a1130443f97278ef%22%2C%22tagIds%22:%5B%5D%7D%2C%7B%22point%22:%5B94344%2C54207%2C431%5D%2C%22type%22:%22point%22%2C%22id%22:%2289c6f2c5cde3dff59cbd5946dfaf3be543ccd42f%22%2C%22tagIds%22:%5B%5D%7D%2C%7B%22point%22:%5B93035%2C54154%2C431%5D%2C%22type%22:%22point%22%2C%22id%22:%22d30960ed49355b669719357bca6eda2a762f265c%22%2C%22tagIds%22:%5B%5D%7D%2C%7B%22point%22:%5B93035%2C54212%2C425%5D%2C%22type%22:%22point%22%2C%22id%22:%22260ef8796154a81b28f9a696edfee7477b479b816%22%2C%22tagIds%22:%5B%5D%7D%2C%7B%22point%22:%5B94329%2C54260%2C425%5D%2C%22type%22:%22point%22%2C%22id%22:%2256d10fc2a676310798ad01ae12cdf981354a5a39%22%2C%22tagIds%22:%5B%5D%7D%2C%7B%22point%22:%5B93014%2C54254%2C419%5D%2C%22type%22:%22point%22%2C%22id%22:%2229edf0c0c6f0a493da2cb65f274fa9b65bf3877d4%22%2C%22tagIds%22:%5B%5D%7D%2C%7B%22point%22:%5B93009%2C54286%2C413%5D%2C%22type%22:%22point%22%2C%22id%22:%22ab2ee399754054f8cd0f5937a04676a91bace8fa%22%2C%22tagIds%22:%5B%5D%7D%2C%7B%22point%22:%5B93003%2C54355%2C408%5D%2C%22type

e%22:%22point%22%2C%22id%22:%229ce4230f5420c74b8b0d6cc91ed7d30cf5369f80%22%2C%22tagl  
ds%22:%5B%5D%7D%2C%7B%22point%22:%5B94302%2C54276%2C408%5D%2C%22type%22:%22poin  
t%22%2C%22id%22:%22ba667d115a8bda307065b4e34d6a7bf6ae7c14de%22%2C%22taglids%22:%5B%  
5D%7D%2C%7B%22point%22:%5B93009%2C54434%2C402%5D%2C%22type%22:%22point%22%2C%22  
id%22:%22e54f4a9cff65dfbc36ef2de2016cf878111d8df7%22%2C%22taglids%22:%5B%5D%7D%2C%7B%  
22point%22:%5B94286%2C54307%2C402%5D%2C%22type%22:%22point%22%2C%22id%22:%224d240  
09eb64b8fc52caf91b0d979b25b16071235%22%2C%22taglids%22:%5B%5D%7D%2C%7B%22point%22:%  
5B93019%2C54497%2C395%5D%2C%22type%22:%22point%22%2C%22id%22:%22bd9899029811daf97  
e27cb35d7732828e76d221b%22%2C%22taglids%22:%5B%5D%7D%2C%7B%22point%22:%5B94281%2C  
54302%2C395%5D%2C%22type%22:%22point%22%2C%22id%22:%22c408a98a1c9f6905b75a363b4c34  
22d98d73c8d2%22%2C%22taglids%22:%5B%5D%7D%2C%7B%22point%22:%5B93013%2C54520%2C387  
%5D%2C%22type%22:%22point%22%2C%22id%22:%22cd45663e3475afeb40af98ec4bf942b38c5010c  
%22%2C%22taglids%22:%5B%5D%7D%2C%7B%22point%22:%5B94265%2C54346%2C387%5D%2C%22ty  
pe%22:%22point%22%2C%22id%22:%2216731ce2e9ac57ebadb6813295c423308a4ddacb%22%2C%22ta  
glids%22:%5B%5D%7D%2C%7B%22point%22:%5B94249%2C54346%2C380%5D%2C%22type%22:%22poi  
nt%22%2C%22id%22:%2276b088883e821c59d0112279fb3f0febf6d9faca%22%2C%22taglids%22:%5B%5  
D%7D%2C%7B%22point%22:%5B93008%2C54583%2C380%5D%2C%22type%22:%22point%22%2C%22i  
d%22:%22260955c68790a836cf7c52e96a8656165a3b6330%22%2C%22taglids%22:%5B%5D%7D%2C%7  
B%22point%22:%5B94254%2C54668%2C372%5D%2C%22type%22:%22point%22%2C%22id%22:%22b1c  
867a13061e9087b247a0d1e2bdd6185b391be%22%2C%22taglids%22:%5B%5D%7D%2C%7B%22point%2  
2:%5B92992%2C54605%2C372%5D%2C%22type%22:%22point%22%2C%22id%22:%22f5ad5799afc4776  
444d143ebfffb25a5c1c26599%22%2C%22taglids%22:%5B%5D%7D%2C%7B%22point%22:%5B92966%2C  
54620%2C366%5D%2C%22type%22:%22point%22%2C%22id%22:%2211ee2312a05c269a9f7e6a403db8  
4b156e78c8ad%22%2C%22taglids%22:%5B%5D%7D%2C%7B%22point%22:%5B94238%2C54399%2C365  
%5D%2C%22type%22:%22point%22%2C%22id%22:%22e3e8d66b505eb26af19f5cb185439dec1580eb4e  
%22%2C%22taglids%22:%5B%5D%7D%2C%7B%22point%22:%5B94238%2C54462%2C357%5D%2C%22ty  
pe%22:%22point%22%2C%22id%22:%225aa819e0c7674b725fbc9f71c827d9d3838eefb3%22%2C%22tag  
lids%22:%5B%5D%7D%2C%7B%22point%22:%5B94223%2C54494%2C351%5D%2C%22type%22:%22poin  
t%22%2C%22id%22:%2295ae4701f44d41f40af4116b47c6df65e416fc84%22%2C%22taglids%22:%5B%5D  
%7D%2C%7B%22point%22:%5B93034%2C55048%2C345%5D%2C%22type%22:%22point%22%2C%22id  
%22:%222fcf372c862b2e88dd91dabdc0482f3c308f6fc%22%2C%22taglids%22:%5B%5D%7D%2C%7B%2  
2point%22:%5B94223%2C54488%2C345%5D%2C%22type%22:%22point%22%2C%22id%22:%22a2f8178  
74a0993de963a9dadfa76320335ed7bab%22%2C%22taglids%22:%5B%5D%7D%2C%7B%22point%22:%5  
B94196%2C54520%2C335%5D%2C%22type%22:%22point%22%2C%22id%22:%22fa2544f83b42b30bf03  
b034e1acfd2ab6ff73dfc%22%2C%22taglids%22:%5B%5D%7D%2C%7B%22point%22:%5B93040%2C5508  
0%2C333%5D%2C%22type%22:%22point%22%2C%22id%22:%225b8cbe4c81df8892b31813efc7242e60  
dc1dbb87%22%2C%22taglids%22:%5B%5D%7D%2C%7B%22point%22:%5B93130%2C55175%2C326%5D  
%2C%22type%22:%22point%22%2C%22id%22:%223cc92300930b0da9acf5319b1b09ee524b843393%22  
%2C%22taglids%22:%5B%5D%7D%2C%7B%22point%22:%5B94180%2C54541%2C325%5D%2C%22type%  
22:%22point%22%2C%22id%22:%22298986b7b566530001946c5cff719fe9e6874b0a%22%2C%22taglids  
%22:%5B%5D%7D%2C%7B%22point%22:%5B93240%2C55255%2C317%5D%2C%22type%22:%22point%  
22%2C%22id%22:%222a3ea581e4b4a1aeba2bca44234a8b86ffe600a5%22%2C%22taglids%22:%5B%5D  
%7D%2C%7B%22point%22:%5B94159%2C54643%2C305%5D%2C%22type%22:%22point%22%2C%22id  
%22:%226f19e830b2d5e721c2289a24e9fe183b48aba093%22%2C%22taglids%22:%5B%5D%7D%2C%7B

%22point%22:%5B94095%2C54711%2C285%5D%2C%22type%22:%22point%22%2C%22id%22:%223fc7ad06b85a09265a1622e9e648b3a6939ab087%22%2C%22tagIds%22:%5B%5D%7D%2C%7B%22point%22:%5B92765%2C54812%2C285%5D%2C%22type%22:%22point%22%2C%22id%22:%22dfb287a5e8dfdc3f4371bd1a7002fb30a3dab804%22%2C%22tagIds%22:%5B%5D%7D%2C%7B%22point%22:%5B92751%2C54905%2C275%5D%2C%22type%22:%22point%22%2C%22id%22:%22adef82e4694ae2ec18dcc4ee5df834c35c7ef722%22%2C%22tagIds%22:%5B%5D%7D%2C%7B%22point%22:%5B94081%2C54862%2C275%5D%2C%22type%22:%22point%22%2C%22id%22:%22a64eb31a8b7e82979405781e2b6af79b25d48963%22%2C%22tagIds%22:%5B%5D%7D%2C%7B%22point%22:%5B92719%2C54952%2C265%5D%2C%22type%22:%22point%22%2C%22id%22:%221ec8b959ab9ce9b767318c30443f1f7a5f44cc87%22%2C%22tagIds%22:%5B%5D%7D%2C%7B%22point%22:%5B94050%2C54857%2C265%5D%2C%22type%22:%22point%22%2C%22id%22:%2253e55c19656675eee8799ac27198b2fa978859a1%22%2C%22tagIds%22:%5B%5D%7D%2C%7B%22point%22:%5B92703%2C54973%2C255%5D%2C%22type%22:%22point%22%2C%22id%22:%22a3048474e2231c4eb11edcbbde4eb6c71706a853%22%2C%22tagIds%22:%5B%5D%7D%2C%7B%22point%22:%5B94013%2C54973%2C255%5D%2C%22type%22:%22point%22%2C%22id%22:%222f8d0ffab98536567b3f6bb1fa02fe83cc85dd544%22%2C%22tagIds%22:%5B%5D%7D%2C%7B%22point%22:%5B93996%2C55074%2C243%5D%2C%22type%22:%22point%22%2C%22id%22:%2255e952fbc066642edc73a8bf315169bb9b876fd5%22%2C%22tagIds%22:%5B%5D%7D%2C%7B%22point%22:%5B92697%2C55063%2C243%5D%2C%22type%22:%22point%22%2C%22id%22:%220eb060faa5f892ac03177ca609c86f4b9eb58d97%22%2C%22tagIds%22:%5B%5D%7D%2C%7B%22point%22:%5B93974%2C55127%2C233%5D%2C%22type%22:%22point%22%2C%22id%22:%22d36043cfd101ab0d90e1ee5f4c91f085486e7f36%22%2C%22tagIds%22:%5B%5D%7D%2C%7B%22point%22:%5B92686%2C55158%2C233%5D%2C%22type%22:%22point%22%2C%22id%22:%2219fa92037402eb5d2dc9cbdfc017250a4f4adb01%22%2C%22tagIds%22:%5B%5D%7D%2C%7B%22point%22:%5B93953%2C55164%2C223%5D%2C%22type%22:%22point%22%2C%22id%22:%22213f41532ad1f590f44b8a84b1268d81a7ed343e%22%2C%22tagIds%22:%5B%5D%7D%2C%7B%22point%22:%5B92681%2C55264%2C223%5D%2C%22type%22:%22point%22%2C%22id%22:%2223b10b8b5544711d488a2cebd8ff9e48f40042f73%22%2C%22tagIds%22:%5B%5D%7D%2C%7B%22point%22:%5B93953%2C55227%2C213%5D%2C%22type%22:%22point%22%2C%22id%22:%2227c66a4eff180293c377b0a75655e9870167604c5%22%2C%22tagIds%22:%5B%5D%7D%2C%7B%22point%22:%5B92676%2C55343%2C213%5D%2C%22type%22:%22point%22%2C%22id%22:%2269786c2127a084bc9272e2e82112900aa9f3ceb6%22%2C%22tagIds%22:%5B%5D%7D%2C%7B%22point%22:%5B93943%2C55322%2C202%5D%2C%22type%22:%22point%22%2C%22id%22:%22209f6bff067bf9393e34f192c8b3bd5c95766dc8%22%2C%22tagIds%22:%5B%5D%7D%2C%7B%22point%22:%5B92654%2C55359%2C202%5D%2C%22type%22:%22point%22%2C%22id%22:%2223a32f92f06d7f64645574e6b7a716283d213598%22%2C%22tagIds%22:%5B%5D%7D%2C%7B%22point%22:%5B92649%2C55549%2C191%5D%2C%22type%22:%22point%22%2C%22id%22:%22276d4a1a46662a62545511dac6aa2040fa4daf8b9%22%2C%22tagIds%22:%5B%5D%7D%2C%7B%22point%22:%5B93959%2C55391%2C191%5D%2C%22type%22:%22point%22%2C%22id%22:%2226ae6f25dbbed4406f9508e67e472991f3c0c7415%22%2C%22tagIds%22:%5B%5D%7D%2C%7B%22point%22:%5B93932%2C55544%2C180%5D%2C%22type%22:%22point%22%2C%22id%22:%222377fb62b4717bdbb9a367602cf6dd3478ba3efc7%22%2C%22tagIds%22:%5B%5D%7D%2C%7B%22point%22:%5B92649%2C55613%2C180%5D%2C%22type%22:%22point%22%2C%22id%22:%222cea921561cd77276a03db7878650aadca067%22%2C%22tagIds%22:%5B%5D%7D%2C%7B%22point%22:%5B93996%2C56019%2C163%5D%2C%22type%22:%22point%22%2C%22id%22:%22fe20fb03134195c101efcc6e84842ff286df26eb%22%2C%22tagIds%22:%5B%5D%7D%2C%7B%22point%22:%5B92697%2C55883%2C151%5D%2C%22type%22:%22point%22%2C%22id%22:%22440cb82832d35810913ec37fef7eca

ea77c98097%22%2C%22tagIds%22:%5B%5D%7D%2C%7B%22point%22:%5B91889%2C51666%2C710%5D%2C%22type%22:%22point%22%2C%22id%22:%229a73dbf8056441491223cafdd89b7c7396229de9%22%2C%22tagIds%22:%5B%5D%7D%2C%7B%22point%22:%5B91883%2C51577%2C715%5D%2C%22type%22:%22point%22%2C%22id%22:%225d4ae070a9923e4255a16d0b228b132b999ca382%22%2C%22tagIds%22:%5B%5D%7D%2C%7B%22point%22:%5B91893%2C51487%2C723%5D%2C%22type%22:%22point%22%2C%22id%22:%22228ce6beb7e30de9d8eb0c2275e9be7ecfd0a544%22%2C%22tagIds%22:%5B%5D%7D%2C%7B%22point%22:%5B91877%2C51332%2C738%5D%2C%22type%22:%22point%22%2C%22id%22:%22f0a036694c888c31d40a7988c3d1419e5a59097b%22%2C%22tagIds%22:%5B%5D%7D%2C%7B%22point%22:%5B91877%2C51252%2C744%5D%2C%22type%22:%22point%22%2C%22id%22:%22f5f381adfb5a4e6895f246884c0d856fda2456b2%22%2C%22tagIds%22:%5B%5D%7D%2C%7B%22point%22:%5B91830%2C51043%2C760%5D%2C%22type%22:%22point%22%2C%22id%22:%22ffd944e14007cb10dd3ffc3108c5a564aa476671%22%2C%22tagIds%22:%5B%5D%7D%2C%7B%22point%22:%5B91698%2C50753%2C778%5D%2C%22type%22:%22point%22%2C%22id%22:%22bb4000077e693ff2026c49fd11fcbca1ea9463a1%22%2C%22tagIds%22:%5B%5D%7D%2C%7B%22point%22:%5B91644%2C50675%2C787%5D%2C%22type%22:%22point%22%2C%22id%22:%22926b47b10c0b0f6846a50ebe6e99c22336713e89%22%2C%22tagIds%22:%5B%5D%7D%2C%7B%22point%22:%5B91515%2C50289%2C814%5D%2C%22type%22:%22point%22%2C%22id%22:%22672d34b27f36c56304567dafd088e7a6ccabb49c%22%2C%22tagIds%22:%5B%5D%7D%2C%7B%22point%22:%5B91467%2C50162%2C824%5D%2C%22type%22:%22point%22%2C%22id%22:%225a39841f8bdb279bc5e44922d6d741a12a96ba5c%22%2C%22tagIds%22:%5B%5D%7D%2C%7B%22point%22:%5B90951%2C48120%2C833%5D%2C%22type%22:%22point%22%2C%22id%22:%2218cc5b88946565f1e35c9f31bdbca8cecb63eeb6%22%2C%22tagIds%22:%5B%5D%7D%2C%7B%22point%22:%5B90904%2C47618%2C843%5D%2C%22type%22:%22point%22%2C%22id%22:%22bab28bfa6656ec86f154e83b088d01f31de95112%22%2C%22tagIds%22:%5B%5D%7D%2C%7B%22point%22:%5B90973%2C47309%2C853%5D%2C%22type%22:%22point%22%2C%22id%22:%22ab5a81f8c66bc49ceba4ca02f9f355de3b8a6bdc%22%2C%22tagIds%22:%5B%5D%7D%2C%7B%22point%22:%5B90999%2C47172%2C860%5D%2C%22type%22:%22point%22%2C%22id%22:%22db46ddc57d13e1a3ac39803a60abb18c3a103975%22%2C%22tagIds%22:%5B%5D%7D%2C%7B%22point%22:%5B90133%2C45244%2C842%5D%2C%22type%22:%22point%22%2C%22id%22:%224f8777d22aed35b064a0794c1f9977c33f680dad%22%2C%22tagIds%22:%5B%5D%7D%2C%7B%22point%22:%5B83111%2C50723%2C1908%5D%2C%22type%22:%22point%22%2C%22id%22:%22ab1c322f4733ee17bbd78a215bb41cbc34108ed9%22%2C%22tagIds%22:%5B%5D%7D%2C%7B%22point%22:%5B83150%2C51024%2C1922%5D%2C%22type%22:%22point%22%2C%22id%22:%225e5dafbedd92f089bf3f02f42cc1f719be79917e%22%2C%22tagIds%22:%5B%5D%7D%2C%7B%22point%22:%5B83168%2C51088%2C1930%5D%2C%22type%22:%22point%22%2C%22id%22:%2246aec6d39ad76b7d6ab79e4a9b3bf42497953675%22%2C%22tagIds%22:%5B%5D%7D%2C%7B%22point%22:%5B84040%2C53534%2C1937%5D%2C%22type%22:%22point%22%2C%22id%22:%22d3ec0efebf523ff28f139d4103ddb339d248b174%22%2C%22tagIds%22:%5B%5D%7D%2C%7B%22point%22:%5B85923%2C57884%2C1934%5D%2C%22type%22:%22point%22%2C%22id%22:%2281ddb4786882360bf8db1d59263dd3b5a38df19f%22%2C%22tagIds%22:%5B%5D%7D%2C%7B%22point%22:%5B85882%2C57865%2C1919%5D%2C%22type%22:%22point%22%2C%22id%22:%22adb29095a20d934ee8c98f63266e8707d7217605%22%2C%22tagIds%22:%5B%5D%7D%2C%7B%22point%22:%5B85813%2C57727%2C1903%5D%2C%22type%22:%22point%22%2C%22id%22:%22e0d86398985fa2f02331b92e449173876ce0e6bb%22%2C%22tagIds%22:%5B%5D%7D%2C%7B%22point%22:%5B85685%2C57567%2C1890%5D%2C%22type%22:%22point%22%2C%22id%22:%22bf701a208adaff8e56aed7aa31df5f8de062a8a0%22%2C%22tagIds%22:%5B%5D%7D%2C%7B%22point%22:%5B85573%2C57402%2C1882%5D%2C%22type

%22:%22point%22%2C%22id%22:%227551b4e63a08b5fa7596fc40d00ed46d35c67ba3%22%2C%22tagl  
s%22:%5B%5D%7D%2C%7B%22point%22:%5B85435%2C57063%2C1869%5D%2C%22type%22:%22poin  
t%22%2C%22id%22:%22bed61776620a26aa24ac578bf6240afd55d3a166%22%2C%22taglids%22:%5B%5  
D%7D%2C%7B%22point%22:%5B62444%2C48565%2C1016%5D%2C%22type%22:%22point%22%2C%22  
id%22:%225f5598502d296a1e7c05a900c3163cdaab3cdb73%22%2C%22taglids%22:%5B%5D%7D%2C%7  
B%22point%22:%5B62730%2C47878%2C1016%5D%2C%22type%22:%22point%22%2C%22id%22:%2240  
6e8cd7d5c3155ba9cc9fbc3c85aae1cd63b406%22%2C%22taglids%22:%5B%5D%7D%2C%7B%22point%2  
2:%5B62730%2C47834%2C1027%5D%2C%22type%22:%22point%22%2C%22id%22:%22c73521e983d52  
974ff7dc2e93dcf0f59687bbe2b%22%2C%22taglids%22:%5B%5D%7D%2C%7B%22point%22:%5B62465%  
2C48544%2C1027%5D%2C%22type%22:%22point%22%2C%22id%22:%22de954e1edee9d97acde661b9  
08f6b1537522d3ab%22%2C%22taglids%22:%5B%5D%7D%2C%7B%22point%22:%5B62772%2C47813%2  
C1038%5D%2C%22type%22:%22point%22%2C%22id%22:%22c8f67f07de77b6ec0c31f0f022854e71ea52  
b8bf%22%2C%22taglids%22:%5B%5D%7D%2C%7B%22point%22:%5B62492%2C48527%2C1038%5D%2C  
%22type%22:%22point%22%2C%22id%22:%22f2b18fbe63f0579be666db13fcdcd0304e86d093%22%2C  
%22taglids%22:%5B%5D%7D%2C%7B%22point%22:%5B62858%2C47758%2C1063%5D%2C%22type%22:  
%22point%22%2C%22id%22:%22bd0a4be9646c8cf2d3e30671b74bb770e30331ba%22%2C%22taglids%2  
2:%5B%5D%7D%2C%7B%22point%22:%5B62468%2C48472%2C1063%5D%2C%22type%22:%22point%2  
2%2C%22id%22:%220dbe66f4a7b60a0bae649f47c4ced0fd7f2145a2%22%2C%22taglids%22:%5B%5D%7  
D%2C%7B%22point%22:%5B62834%2C47723%2C1074%5D%2C%22type%22:%22point%22%2C%22id%  
22:%228def40f6ec27788983cc819cfd643f3d34fb68a6%22%2C%22taglids%22:%5B%5D%7D%2C%7B%2  
point%22:%5B62851%2C47702%2C1084%5D%2C%22type%22:%22point%22%2C%22id%22:%22ea9c2d  
315dba013fcf9646e5c7908e11ea48f639%22%2C%22taglids%22:%5B%5D%7D%2C%7B%22point%22:%5  
B62516%2C48410%2C1084%5D%2C%22type%22:%22point%22%2C%22id%22:%2232b376a0667761cd8  
99a2bdd026de19c8983af25%22%2C%22taglids%22:%5B%5D%7D%2C%7B%22point%22:%5B62854%2C4  
7668%2C1096%5D%2C%22type%22:%22point%22%2C%22id%22:%222abc5f1e40ed071784773cab2769  
2760d522c858%22%2C%22taglids%22:%5B%5D%7D%2C%7B%22point%22:%5B62506%2C48362%2C109  
6%5D%2C%22type%22:%22point%22%2C%22id%22:%22e02762853a8fb641b1c6e3280641b5d13102dfb  
0%22%2C%22taglids%22:%5B%5D%7D%2C%7B%22point%22:%5B62519%2C48344%2C1107%5D%2C%2  
2type%22:%22point%22%2C%22id%22:%2247b5b0df35976e017976d6bf4e13915eafbdb394%22%2C%2  
2taglids%22:%5B%5D%7D%2C%7B%22point%22:%5B62868%2C47668%2C1107%5D%2C%22type%22:%2  
2point%22%2C%22id%22:%22b61d4684c08bdb5eb71fd041c90769a2946a9390%22%2C%22taglids%22:  
%5B%5D%7D%2C%7B%22point%22:%5B62854%2C47644%2C1118%5D%2C%22type%22:%22point%22  
%2C%22id%22:%225488c660424f94481318430aff251359f4e9f555%22%2C%22taglids%22:%5B%5D%7D  
%2C%7B%22point%22:%5B62526%2C48324%2C1118%5D%2C%22type%22:%22point%22%2C%22id%22  
:%2220cace7c6647df5f6bd9aef456aec904b6245637%22%2C%22taglids%22:%5B%5D%7D%2C%7B%22p  
oint%22:%5B62851%2C47647%2C1129%5D%2C%22type%22:%22point%22%2C%22id%22:%2248d03be  
f4a43bb1885b3805bd2a5c6140769afeb%22%2C%22taglids%22:%5B%5D%7D%2C%7B%22point%22:%5B  
62492%2C48300%2C1129%5D%2C%22type%22:%22point%22%2C%22id%22:%227ddaee3e16d1c04575  
1ba0fb4eb197795666da96%22%2C%22taglids%22:%5B%5D%7D%2C%7B%22point%22:%5B62837%2C47  
634%2C1139%5D%2C%22type%22:%22point%22%2C%22id%22:%22b6d4b83a8b2dd9a49a18ba46a656  
c303430b513f%22%2C%22taglids%22:%5B%5D%7D%2C%7B%22point%22:%5B62457%2C48289%2C113  
9%5D%2C%22type%22:%22point%22%2C%22id%22:%22a68b15777d29b86fda8d5890faa764ce1426c74  
d%22%2C%22taglids%22:%5B%5D%7D%2C%7B%22point%22:%5B62809%2C47599%2C1150%5D%2C%2  
2type%22:%22point%22%2C%22id%22:%225e84214bd901474853b0992226741a0a9063956e%22%2C%

22tagIds%22:%5B%5D%7D%2C%7B%22point%22:%5B62454%2C48279%2C1150%5D%2C%22type%22:%22point%22%2C%22id%22:%229fd6668a7bdc093e1f2b73e4501263a0da2adc75%22%2C%22tagIds%22:%5B%5D%7D%2C%7B%22point%22:%5B62402%2C48268%2C1160%5D%2C%22type%22:%22point%22%2C%22id%22:%222caf670b49e930960352096835584c32be6a7888%22%2C%22tagIds%22:%5B%5D%7D%2C%7B%22point%22:%5B62892%2C47665%2C1161%5D%2C%22type%22:%22point%22%2C%22id%22:%22a19664ae9598b7abf63b5985a0220f9275355263%22%2C%22tagIds%22:%5B%5D%7D%2C%7B%22point%22:%5B62885%2C47696%2C1171%5D%2C%22type%22:%22point%22%2C%22id%22:%22b9eb598e72cff041633f0952060e948361c798c6%22%2C%22tagIds%22:%5B%5D%7D%2C%7B%22point%22:%5B62381%2C48293%2C1171%5D%2C%22type%22:%22point%22%2C%22id%22:%22c656b2ad3e96d67b70c5bd43d6ec7a9a39394ca7%22%2C%22tagIds%22:%5B%5D%7D%2C%7B%22point%22:%5B62882%2C47713%2C1181%5D%2C%22type%22:%22point%22%2C%22id%22:%2246beb66456e38f60fe25787b8860dda57a915b56%22%2C%22tagIds%22:%5B%5D%7D%2C%7B%22point%22:%5B62319%2C48300%2C1181%5D%2C%22type%22:%22point%22%2C%22id%22:%22931fd421c549bc855fa6d6a545c1677fc17ba328%22%2C%22tagIds%22:%5B%5D%7D%2C%7B%22point%22:%5B62899%2C47748%2C1191%5D%2C%22type%22:%22point%22%2C%22id%22:%22cbde50739c85c31f375b40631df63d9dd8515bb6%22%2C%22tagIds%22:%5B%5D%7D%2C%7B%22point%22:%5B62312%2C48313%2C1192%5D%2C%22type%22:%22point%22%2C%22id%22:%22cacd1016cae3f1a89245a90623561765a4a2da91%22%2C%22tagIds%22:%5B%5D%7D%2C%7B%22point%22:%5B62920%2C47796%2C1202%5D%2C%22type%22:%22point%22%2C%22id%22:%2222db8650f5abace4a0fab2cdf94e9aee219fc4c4%22%2C%22tagIds%22:%5B%5D%7D%2C%7B%22point%22:%5B62285%2C48331%2C1202%5D%2C%22type%22:%22point%22%2C%22id%22:%227f4ba6e1a4a0cd0dff6c1c792b7e103b90b776b%22%2C%22tagIds%22:%5B%5D%7D%2C%7B%22point%22:%5B62895%2C47841%2C1212%5D%2C%22type%22:%22point%22%2C%22id%22:%227fbd22dd5a4a8def6a63674a8e7bf26a5c83db1e%22%2C%22tagIds%22:%5B%5D%7D%2C%7B%22point%22:%5B62789%2C48272%2C1212%5D%2C%22type%22:%22point%22%2C%22id%22:%224366f3ae055f5b8b24e1438f10cf169ed8d7243b%22%2C%22tagIds%22:%5B%5D%7D%2C%7B%22point%22:%5B62281%2C48365%2C1212%5D%2C%22type%22:%22point%22%2C%22id%22:%22e4d36a5a6e9d41600b4c29215e35ea6891b8e9f2%22%2C%22tagIds%22:%5B%5D%7D%2C%7B%22point%22:%5B62123%2C48369%2C1225%5D%2C%22type%22:%22point%22%2C%22id%22:%2276f31f94f86ae47d145d27f8b20444ba3751e997%22%2C%22tagIds%22:%5B%5D%7D%2C%7B%22point%22:%5B62833%2C47872%2C1225%5D%2C%22type%22:%22point%22%2C%22id%22:%22e3544e9182797d02427b091d9d053913e37e42d4%22%2C%22tagIds%22:%5B%5D%7D%2C%7B%22point%22:%5B62837%2C47923%2C1235%5D%2C%22type%22:%22point%22%2C%22id%22:%225c5ab2d663ad7e2049eb6dc4c8db5e2b6694ca10%22%2C%22tagIds%22:%5B%5D%7D%2C%7B%22point%22:%5B62088%2C48386%2C1235%5D%2C%22type%22:%22point%22%2C%22id%22:%22ab875d381f6925e885e5639d1b0738fb4ca53bbf%22%2C%22tagIds%22:%5B%5D%7D%2C%7B%22point%22:%5B62820%2C48065%2C1245%5D%2C%22type%22:%22point%22%2C%22id%22:%2269728d2c692aa76a1cfde58fa4bb1c6a08c81c19%22%2C%22tagIds%22:%5B%5D%7D%2C%7B%22point%22:%5B61999%2C48369%2C1245%5D%2C%22type%22:%22point%22%2C%22id%22:%22f626bfc46ec1c1d19757cf0d8ed443399e517f2f%22%2C%22tagIds%22:%5B%5D%7D%2C%7B%22point%22:%5B62764%2C48155%2C1255%5D%2C%22type%22:%22point%22%2C%22id%22:%22a36e1b158d7ab78b3a409892caeab6b150ad4553%22%2C%22tagIds%22:%5B%5D%7D%2C%7B%22point%22:%5B61961%2C48386%2C1255%5D%2C%22type%22:%22point%22%2C%22id%22:%22968cfde5d60ae3a25701bbfd2c379fab04c56e%22%2C%22tagIds%22:%5B%5D%7D%2C%7B%22point%22:%5B61809%2C48310%2C1265%5D%2C%22type%22:%22point%22%2C%22id%22:%2232c82e6b377510d08d22053b5b049a02e8d8b959%22%2C%22tagIds%22:%5B%5D%7D%2C%7B%22point%22:%5B61736%2C48267%2C1282%5D%2

C%22type%22:%22point%22%2C%22id%22:%223bd093008d7b2e6b2a386c899cdf9635cfa1b346%22%2C%22tagIds%22:%225B%5D%7D%2C%7B%22point%22:%225B61706%2C48255%2C1292%5D%2C%22type%22:%22point%22%2C%22id%22:%22e834b6d230975f9424fae622fa48f8cb278b98e8%22%2C%22tagIds%22:%225B%5D%7D%2C%7B%22point%22:%225B61677%2C48313%2C1302%5D%2C%22type%22:%22point%22%2C%22id%22:%22feb68f857e04f2f9f580d5982801467223e21639%22%2C%22tagIds%22:%225B%5D%7D%2C%7B%22point%22:%225B61657%2C48355%2C1312%5D%2C%22type%22:%22point%22%2C%22id%22:%223356ebd34dd2e01c411796650428875243f846cf%22%2C%22tagIds%22:%225B%5D%7D%2C%7B%22point%22:%225B61616%2C48367%2C1323%5D%2C%22type%22:%22point%22%2C%22id%22:%2271bae6e5f373e722c7fb886474ec7d971030050%22%2C%22tagIds%22:%225B%5D%7D%2C%7B%22point%22:%225B61575%2C48409%2C1335%5D%2C%22type%22:%22point%22%2C%22id%22:%2235dbcd571c6f16e18c7f210daf6c3612d8e6ba53%22%2C%22tagIds%22:%225B%5D%7D%2C%7B%22point%22:%225B61530%2C48402%2C1344%5D%2C%22type%22:%22point%22%2C%22id%22:%2282e44b6e58e6ad7d61f1606c5b6d932c19167959%22%2C%22tagIds%22:%225B%5D%7D%2C%7B%22point%22:%225B61495%2C48511%2C1354%5D%2C%22type%22:%22point%22%2C%22id%22:%2280682d28f630fbd1ec752cbb4e80b86e21d02428%22%2C%22tagIds%22:%225B%5D%7D%2C%7B%22point%22:%225B61491%2C48629%2C1365%5D%2C%22type%22:%22point%22%2C%22id%22:%222bea2c374266bf988156d54c60b886f82316a1b3c%22%2C%22tagIds%22:%225B%5D%7D%2C%7B%22point%22:%225B61471%2C48664%2C1375%5D%2C%22type%22:%22point%22%2C%22id%22:%22d5faeae945dbee4236f1cea0c0128bbbadfb5c25%22%2C%22tagIds%22:%225B%5D%7D%2C%7B%22point%22:%225B61423%2C48643%2C1385%5D%2C%22type%22:%22point%22%2C%22id%22:%22abdeea355bd8e52bd76247f8c45da9f83a60c54d%22%2C%22tagIds%22:%225B%5D%7D%2C%7B%22point%22:%225B61401%2C48693%2C1396%5D%2C%22type%22:%22point%22%2C%22id%22:%222a67d6d41e3a6bfb4f3c31ea4d44c9b9371fc77f%22%2C%22tagIds%22:%225B%5D%7D%2C%7B%22point%22:%225B61384%2C48724%2C1406%5D%2C%22type%22:%22point%22%2C%22id%22:%227004500da85c27b882211b2c9b6bda07e62f1da4%22%2C%22tagIds%22:%225B%5D%7D%2C%7B%22point%22:%225B61318%2C48748%2C1415%5D%2C%22type%22:%22point%22%2C%22id%22:%22e291424762bc4c7acad152ee97948216e833074%22%2C%22tagIds%22:%225B%5D%7D%2C%7B%22point%22:%225B61244%2C48739%2C1425%5D%2C%22type%22:%22point%22%2C%22id%22:%2226e986a6229d31ec0b01bff2d817c73c46c804b8f%22%2C%22tagIds%22:%225B%5D%7D%2C%7B%22point%22:%225B61240%2C48773%2C1435%5D%2C%22type%22:%22point%22%2C%22id%22:%222b7c57968b4acd49f1b3ff15604a8f62801815719%22%2C%22tagIds%22:%225B%5D%7D%2C%7B%22point%22:%225B61185%2C48794%2C1446%5D%2C%22type%22:%22point%22%2C%22id%22:%222b85c0e2a8fae3b5c3a68becbf4c2228a525edc42%22%2C%22tagIds%22:%225B%5D%7D%2C%7B%22point%22:%225B61161%2C48856%2C1465%5D%2C%22type%22:%22point%22%2C%22id%22:%222d35a839b31f0f8a767e0c2cb9fda13307784c414%22%2C%22tagIds%22:%225B%5D%7D%2C%7B%22point%22:%225B61108%2C48840%2C1475%5D%2C%22type%22:%22point%22%2C%22id%22:%220f3247b56acd747458f3430999c67d089f987470%22%2C%22tagIds%22:%225B%5D%7D%2C%7B%22point%22:%225B61132%2C48871%2C1485%5D%2C%22type%22:%22point%22%2C%22id%22:%221784ecf162f35e01521ebd992f745926b7eeb756%22%2C%22tagIds%22:%225B%5D%7D%2C%7B%22point%22:%225B61122%2C48882%2C1496%5D%2C%22type%22:%22point%22%2C%22id%22:%22079680f8253e532f2088f591a051b1a4f6b70ff8%22%2C%22tagIds%22:%225B%5D%7D%2C%7B%22point%22:%225B61111%2C48874%2C1507%5D%2C%22type%22:%22point%22%2C%22id%22:%222d55972b1b086657b86d2fc1db02b1dcc14b4c3c1%22%2C%22tagIds%22:%225B%5D%7D%2C%7B%22point%22:%225B61111%2C48874%2C1517%5D%2C%22type%22:%22point%22%2C%22id%22:%22ed0ac813561aa07ab0dc0b1d9c6240ef188a560d%22%2C%22tagIds%22:%225B%5D%7D%2C%7B%22point%22:%225B61063%2C48877%2C1537%5D%2C%22type%22:%22point%22%2C%22id%22:%22aa04d839e6bec9a4e8e471869262bf0891a62351%

22%2C%22tagIds%22:%5B%5D%7D%2C%7B%22point%22:%5B61060%2C48891%2C1547%5D%2C%22ty  
pe%22:%22point%22%2C%22id%22:%22732f1c8abb0e8a08ecb86e4170d256db2cd766be%22%2C%22ta  
gIds%22:%5B%5D%7D%2C%7B%22point%22:%5B61049%2C48891%2C1557%5D%2C%22type%22:%22p  
oint%22%2C%22id%22:%227b605ebba49e33c3511a7fe2680d2e4277760e79%22%2C%22tagIds%22:%5  
B%5D%7D%2C%7B%22point%22:%5B61066%2C48905%2C1567%5D%2C%22type%22:%22point%22%2C  
%22id%22:%226237b0367aa0e0753721f19b997f62c2ffe9d35d%22%2C%22tagIds%22:%5B%5D%7D%2C  
%7B%22point%22:%5B61018%2C48877%2C1577%5D%2C%22type%22:%22point%22%2C%22id%22:%2  
24ba433bc5013cd4aa5f150c10226efcf51ce7a21%22%2C%22tagIds%22:%5B%5D%7D%2C%7B%22point  
%22:%5B60943%2C48840%2C1601%5D%2C%22type%22:%22point%22%2C%22id%22:%224501141cc60  
9df9777083645c9de4aec835fb379%22%2C%22tagIds%22:%5B%5D%7D%2C%7B%22point%22:%5B6100  
5%2C48930%2C1612%5D%2C%22type%22:%22point%22%2C%22id%22:%22f3686e0f6185cdc8e4e89c7  
a1ad48d2bb5fe5433%22%2C%22tagIds%22:%5B%5D%7D%2C%7B%22point%22:%5B61032%2C48950%  
2C1622%5D%2C%22type%22:%22point%22%2C%22id%22:%222cfff0c59e01b206e6878859e2c234c50  
b40f38%22%2C%22tagIds%22:%5B%5D%7D%2C%7B%22point%22:%5B61115%2C49033%2C1640%5D%  
2C%22type%22:%22point%22%2C%22id%22:%22fa94303468955ba7b5bda0624a46b41c0319cd7f%22%  
2C%22tagIds%22:%5B%5D%7D%2C%7B%22point%22:%5B61029%2C48961%2C1651%5D%2C%22type%  
22:%22point%22%2C%22id%22:%22e6a4e239243ebf281e1f7125e25421f3148123f4%22%2C%22tagIds  
%22:%5B%5D%7D%2C%7B%22point%22:%5B61012%2C48971%2C1661%5D%2C%22type%22:%22point  
%22%2C%22id%22:%2250919663d33e3abcc9478f94c68e9418260c5d56%22%2C%22tagIds%22:%5B%5  
D%7D%2C%7B%22point%22:%5B61036%2C49009%2C1672%5D%2C%22type%22:%22point%22%2C%22  
id%22:%22a19a831aaa9c4ac31a9a1f7af79acff40d70927b%22%2C%22tagIds%22:%5B%5D%7D%2C%7B  
%22point%22:%5B61053%2C49019%2C1682%5D%2C%22type%22:%22point%22%2C%22id%22:%2285e  
418e175912408e44ae445b796e1e87d217802%22%2C%22tagIds%22:%5B%5D%7D%2C%7B%22point%2  
2:%5B61101%2C49057%2C1692%5D%2C%22type%22:%22point%22%2C%22id%22:%2277a0c67db8c2b  
93921b3aa38fd987caac5f66915%22%2C%22tagIds%22:%5B%5D%7D%2C%7B%22point%22:%5B61118%  
2C49072%2C1702%5D%2C%22type%22:%22point%22%2C%22id%22:%223facb026ce8130c62e76694b7  
9734d1bd2168b56%22%2C%22tagIds%22:%5B%5D%7D%2C%7B%22point%22:%5B61242%2C49179%2C  
1713%5D%2C%22type%22:%22point%22%2C%22id%22:%226533c84478f0c382be10aff5a90d4e572232  
ce6b%22%2C%22tagIds%22:%5B%5D%7D%2C%7B%22point%22:%5B61200%2C49155%2C1724%5D%2C  
%22type%22:%22point%22%2C%22id%22:%22eb3d590ab81d07d81efeca5a94e428e34e435114%22%2C  
%22tagIds%22:%5B%5D%7D%2C%7B%22point%22:%5B61283%2C49193%2C1736%5D%2C%22type%22:  
%22point%22%2C%22id%22:%224229fb6276b0a65bb4467a358c19caadcfdc53dd%22%2C%22tagIds%22  
:%5B%5D%7D%2C%7B%22point%22:%5B61321%2C49227%2C1746%5D%2C%22type%22:%22point%22  
%2C%22id%22:%2292b59b5f1d807389d44f4ef0cc555fa9a1f6b0b4%22%2C%22tagIds%22:%5B%5D%7D  
%2C%7B%22point%22:%5B61293%2C49234%2C1758%5D%2C%22type%22:%22point%22%2C%22id%22  
:%226203e647fca6f02943a2687642ed5ffcd0f26767%22%2C%22tagIds%22:%5B%5D%7D%2C%7B%22po  
int%22:%5B61462%2C49317%2C1770%5D%2C%22type%22:%22point%22%2C%22id%22:%225b85c950  
77dce4401d8ccf3aef38249d9101a39a%22%2C%22tagIds%22:%5B%5D%7D%2C%7B%22point%22:%5B6  
1542%2C49331%2C1781%5D%2C%22type%22:%22point%22%2C%22id%22:%222a434821249ebb61c3c  
cc2db5547b092cfd4c40c%22%2C%22tagIds%22:%5B%5D%7D%2C%7B%22point%22:%5B61721%2C493  
82%2C1799%5D%2C%22type%22:%22point%22%2C%22id%22:%2273bca93f112fa718771050a4a1f03b2  
21adb51a%22%2C%22tagIds%22:%5B%5D%7D%2C%7B%22point%22:%5B61899%2C49422%2C1809%5  
D%2C%22type%22:%22point%22%2C%22id%22:%22e19bcd95228998ef6b684fa564c593f0629864ad%2  
2%2C%22tagIds%22:%5B%5D%7D%2C%7B%22point%22:%5B61960%2C49455%2C1820%5D%2C%22ty

e%22:%22point%22%2C%22id%22:%22bb46efe4059deeddd60ab382d2c37cd69ef8b328%22%2C%22tag  
lds%22:%5B%5D%7D%2C%7B%22point%22:%5B62174%2C49468%2C1831%5D%2C%22type%22:%22poi  
nt%22%2C%22id%22:%22de02cec1a72817543e1301fe9f745c8ef1f06e4a%22%2C%22taglds%22:%5B%5  
D%7D%2C%7B%22point%22:%5B62275%2C49480%2C1842%5D%2C%22type%22:%22point%22%2C%22  
id%22:%2206f0eaa1e3b121519e066d3f6b2a3559046ca8b%22%2C%22taglds%22:%5B%5D%7D%2C%7  
B%22point%22:%5B62323%2C49504%2C1852%5D%2C%22type%22:%22point%22%2C%22id%22:%2264  
715500aabf1a654e0ee55a25e4eb7c117e8ae9%22%2C%22taglds%22:%5B%5D%7D%2C%7B%22point%2  
2:%5B62427%2C49528%2C1873%5D%2C%22type%22:%22point%22%2C%22id%22:%22ecee3d066de27  
1432a4aca99433f0a17dd86fd71%22%2C%22taglds%22:%5B%5D%7D%2C%7B%22point%22:%5B62492  
%2C49542%2C1883%5D%2C%22type%22:%22point%22%2C%22id%22:%22585a496b2e92609bfaed010  
83735f9e0d9f5f493%22%2C%22taglds%22:%5B%5D%7D%2C%7B%22point%22:%5B62497%2C49553%2  
C1894%5D%2C%22type%22:%22point%22%2C%22id%22:%22171223d2eeff753ec63651439aeb10ef5fd  
6696a%22%2C%22taglds%22:%5B%5D%7D%2C%7B%22point%22:%5B62504%2C49556%2C1904%5D%2  
C%22type%22:%22point%22%2C%22id%22:%2299e10954cfd8dc86dfdcc4df03928d1a83ff71b0%22%2C  
%22taglds%22:%5B%5D%7D%2C%7B%22point%22:%5B62511%2C49549%2C1915%5D%2C%22type%22:  
%22point%22%2C%22id%22:%2288e7245e2e93e0957bd345157b04dcd7af8b7fd8%22%2C%22taglds%2  
2:%5B%5D%7D%2C%7B%22point%22:%5B62527%2C49533%2C1926%5D%2C%22type%22:%22point%2  
2%2C%22id%22:%224ca9168d4f8bb3504680711c08415420ea1177b8%22%2C%22taglds%22:%5B%5D%  
7D%2C%7B%22point%22:%5B62600%2C49509%2C1936%5D%2C%22type%22:%22point%22%2C%22id  
%22:%223ce38ee640f5f68dc13af2b80798a2d832fdaeb6%22%2C%22taglds%22:%5B%5D%7D%2C%7B%  
22point%22:%5B62569%2C49498%2C1946%5D%2C%22type%22:%22point%22%2C%22id%22:%229fbe  
72f8a77297ec0895e29d89e0db0bd8475f55%22%2C%22taglds%22:%5B%5D%7D%2C%7B%22point%22:  
%5B62514%2C49447%2C1956%5D%2C%22type%22:%22point%22%2C%22id%22:%221566fff95444374  
e0d67e10035482f631b50341a%22%2C%22taglds%22:%5B%5D%7D%2C%7B%22point%22:%5B62538%2  
C49419%2C1966%5D%2C%22type%22:%22point%22%2C%22id%22:%228bc33f8b338d73fe89ba984c4d  
589cab6fe5eb8c%22%2C%22taglds%22:%5B%5D%7D%2C%7B%22point%22:%5B62682%2C49372%2C1  
976%5D%2C%22type%22:%22point%22%2C%22id%22:%22af458dfc8b00874bf3a8bdbcbdc6947c714fa8  
3c%22%2C%22taglds%22:%5B%5D%7D%2C%7B%22point%22:%5B62786%2C49361%2C1986%5D%2C%  
22type%22:%22point%22%2C%22id%22:%2212d9e8be8c11a912c1ea995ffe59f4f5616b4285%22%2C%2  
2taglds%22:%5B%5D%7D%2C%7B%22point%22:%5B62935%2C49352%2C1996%5D%2C%22type%22:%2  
2point%22%2C%22id%22:%2289132119b47f5928c4d9e1d19b60205be3c82591%22%2C%22taglds%22:  
%5B%5D%7D%2C%7B%22point%22:%5B63121%2C49307%2C2006%5D%2C%22type%22:%22point%22  
%2C%22id%22:%22b5490f19f3243a57c7f9caf4cc247b7b6af0b9a2%22%2C%22taglds%22:%5B%5D%7D  
%2C%7B%22point%22:%5B63623%2C49066%2C2056%5D%2C%22type%22:%22point%22%2C%22id%22  
:%228465cd4f38ec63f959e60a6665ed440fc91db7be%22%2C%22taglds%22:%5B%5D%7D%2C%7B%22p  
oint%22:%5B63882%2C48924%2C2071%5D%2C%22type%22:%22point%22%2C%22id%22:%223ec9e68  
212fcd9a2f430f80312b7fb13949c423b%22%2C%22taglds%22:%5B%5D%7D%2C%7B%22point%22:%5B  
67090%2C46030%2C2065%5D%2C%22type%22:%22point%22%2C%22id%22:%22943ddfee4cd77cacc11  
f2e42a0460a86e4eb8749%22%2C%22taglds%22:%5B%5D%7D%2C%7B%22point%22:%5B67155%2C460  
26%2C2055%5D%2C%22type%22:%22point%22%2C%22id%22:%22499b815c580cffbf90ce058f0124765  
bc56a6be6%22%2C%22taglds%22:%5B%5D%7D%2C%7B%22point%22:%5B67252%2C45979%2C2036%  
5D%2C%22type%22:%22point%22%2C%22id%22:%22cb441d3b1029a20eaff82737daaa2ef727ead098%  
22%2C%22taglds%22:%5B%5D%7D%2C%7B%22point%22:%5B67822%2C46012%2C1991%5D%2C%22ty  
pe%22:%22point%22%2C%22id%22:%223fc24d5696d15813d0cb6ab2d62018161b0c55cd%22%2C%22ta

glds%22:%5B%5D%7D%2C%7B%22point%22:%5B67061%2C45441%2C1991%5D%2C%22type%22:%22p  
oint%22%2C%22id%22:%221569de23e7371e3f99def7001ac1ddf5d04fa681%22%2C%22taglds%22:%5B  
%5D%7D%2C%7B%22point%22:%5B67111%2C45426%2C1981%5D%2C%22type%22:%22point%22%2C  
%22id%22:%228888b0317a5941ca0e7ecf5224fc1d22716b5b33%22%2C%22taglds%22:%5B%5D%7D%2  
C%7B%22point%22:%5B67900%2C46030%2C1981%5D%2C%22type%22:%22point%22%2C%22id%22:%  
22b8b80dcff29d49b0f7a3d0dfcff0330fb2508b56%22%2C%22taglds%22:%5B%5D%7D%2C%7B%22point  
%22:%5B67229%2C45383%2C1970%5D%2C%22type%22:%22point%22%2C%22id%22:%221a35cb2aea9  
b354a09ea0dcb693ed3c5d6b05386%22%2C%22taglds%22:%5B%5D%7D%2C%7B%22point%22:%5B673  
48%2C45393%2C1960%5D%2C%22type%22:%22point%22%2C%22id%22:%22a17612f356de3e348b1c6  
7dba36869c726781d30%22%2C%22taglds%22:%5B%5D%7D%2C%7B%22point%22:%5B68014%2C4601  
1%2C1960%5D%2C%22type%22:%22point%22%2C%22id%22:%22f5efbc03f02fd3f4021cdf0c04b138cd1  
b8224ac%22%2C%22taglds%22:%5B%5D%7D%2C%7B%22point%22:%5B67439%2C45353%2C1950%5D  
%2C%22type%22:%22point%22%2C%22id%22:%2292bdfb2e27bdbd7e4c0d0599757155e90d5e9227%2  
2%2C%22taglds%22:%5B%5D%7D%2C%7B%22point%22:%5B68000%2C45995%2C1950%5D%2C%22typ  
e%22:%22point%22%2C%22id%22:%2214c620f7dcd4b8b027a64208be686d716c25b398%22%2C%22tag  
lds%22:%5B%5D%7D%2C%7B%22point%22:%5B67566%2C45319%2C1939%5D%2C%22type%22:%22poi  
nt%22%2C%22id%22:%2221c92569c821b047ab04b93e8b06622c75cf715d%22%2C%22taglds%22:%5B%  
5D%7D%2C%7B%22point%22:%5B67674%2C45236%2C1929%5D%2C%22type%22:%22point%22%2C%2  
2id%22:%220952cb324c5b23c9ab4841da9233bf0bc1463ec8%22%2C%22taglds%22:%5B%5D%7D%2C%  
7B%22point%22:%5B68197%2C46035%2C1929%5D%2C%22type%22:%22point%22%2C%22id%22:%226  
a2f6dbe6fa93fb1bb23a4b33c3d46f121156d8d%22%2C%22taglds%22:%5B%5D%7D%2C%7B%22point%  
22:%5B67840%2C45198%2C1919%5D%2C%22type%22:%22point%22%2C%22id%22:%2211294a73229c  
c2be0b1f340539a872fd2e5f8dbf%22%2C%22taglds%22:%5B%5D%7D%2C%7B%22point%22:%5B67944  
%2C45193%2C1909%5D%2C%22type%22:%22point%22%2C%22id%22:%22ef3d040e2d1a8095d94d903  
aeec5f7642b8b6c22%22%2C%22taglds%22:%5B%5D%7D%2C%7B%22point%22:%5B68137%2C45148%2  
C1899%5D%2C%22type%22:%22point%22%2C%22id%22:%221810a5e19d3eebff02a3912c3e6d744cdcd  
9673a%22%2C%22taglds%22:%5B%5D%7D%2C%7B%22point%22:%5B68459%2C46041%2C1899%5D%2  
C%22type%22:%22point%22%2C%22id%22:%222190a2e1d4ec962a573ff620526de43edb8ffacb%22%2C  
%22taglds%22:%5B%5D%7D%2C%7B%22point%22:%5B68597%2C45057%2C1884%5D%2C%22type%22:  
%22point%22%2C%22id%22:%226eb8c4c14f37f3875905704533de99c325518477%22%2C%22taglds%2  
2:%5B%5D%7D%2C%7B%22point%22:%5B68735%2C45081%2C1874%5D%2C%22type%22:%22point%2  
2%2C%22id%22:%22dc05df50c588edbf8aa222c92c0f58fa1f5d8dfe%22%2C%22taglds%22:%5B%5D%7D  
%2C%7B%22point%22:%5B68730%2C46004%2C1864%5D%2C%22type%22:%22point%22%2C%22id%22  
:%22e8135347c658b94dcfba1c171a5f3ba6d7b0c8cb%22%2C%22taglds%22:%5B%5D%7D%2C%7B%22p  
oint%22:%5B69096%2C45106%2C1864%5D%2C%22type%22:%22point%22%2C%22id%22:%22c47c28cc  
022f2097a18e81793f9e7539a7183ddd%22%2C%22taglds%22:%5B%5D%7D%2C%7B%22point%22:%5B  
68801%2C46060%2C1854%5D%2C%22type%22:%22point%22%2C%22id%22:%22d1b6c2d2e79a46e806  
3cc334ae3f012bf450cf19%22%2C%22taglds%22:%5B%5D%7D%2C%7B%22point%22:%5B69281%2C451  
41%2C1853%5D%2C%22type%22:%22point%22%2C%22id%22:%22d1a4eadef7faf5a7a89baf4cf058216a  
a995bc8e%22%2C%22taglds%22:%5B%5D%7D%2C%7B%22point%22:%5B69229%2C45194%2C1843%5  
D%2C%22type%22:%22point%22%2C%22id%22:%22d7f09f389a8fd7bbd212a2e545e3bcb7bd7e34d%2  
2%2C%22taglds%22:%5B%5D%7D%2C%7B%22point%22:%5B69129%2C46116%2C1802%5D%2C%22typ  
e%22:%22point%22%2C%22id%22:%222bd02a6481f4a50cf044677b6899daa7c2d2a0fd%22%2C%22tagl  
ds%22:%5B%5D%7D%2C%7B%22point%22:%5B69256%2C46103%2C1781%5D%2C%22type%22:%22poi

nt%22%2C%22id%22:%22dc896241b9fd5f6e6a9ddc48c99a0406ddaffb70%22%2C%22tagIds%22:%5B%5D%7D%2C%7B%22point%22:%5B69841%2C45185%2C1781%5D%2C%22type%22:%22point%22%2C%22id%22:%220cf2164d961dfcf1e7c2c1392f333b38b177a591%22%2C%22tagIds%22:%5B%5D%7D%2C%7B%22point%22:%5B69846%2C45190%2C1771%5D%2C%22type%22:%22point%22%2C%22id%22:%221f3e668ef4c8dfb83b0a2cc4ea238bc7c5eac016%22%2C%22tagIds%22:%5B%5D%7D%2C%7B%22point%22:%5B69329%2C46125%2C1766%5D%2C%22type%22:%22point%22%2C%22id%22:%226f9ca272b02767333ed94af797c4d6cb433f53cc%22%2C%22tagIds%22:%5B%5D%7D%2C%7B%22point%22:%5B69947%2C45213%2C1756%5D%2C%22type%22:%22point%22%2C%22id%22:%222299f89ad021446394e8292177c7e90361d5ba04%22%2C%22tagIds%22:%5B%5D%7D%2C%7B%22point%22:%5B69386%2C46087%2C1752%5D%2C%22type%22:%22point%22%2C%22id%22:%222a629571f15f00a396d5f31ce43439ba3f8f9de9%22%2C%22tagIds%22:%5B%5D%7D%2C%7B%22point%22:%5B70047%2C45236%2C1742%5D%2C%22type%22:%22point%22%2C%22id%22:%221a1902146ed14781ef36b513cbd367e38ef97892%22%2C%22tagIds%22:%5B%5D%7D%2C%7B%22point%22:%5B70281%2C45239%2C1731%5D%2C%22type%22:%22point%22%2C%22id%22:%22a8d0a2910b49a31f293e030aa427ed04e1012e76%22%2C%22tagIds%22:%5B%5D%7D%2C%7B%22point%22:%5B70476%2C45267%2C1720%5D%2C%22type%22:%22point%22%2C%22id%22:%2231c5edbc1732e82e526b762c9669453d3e2b0345%22%2C%22tagIds%22:%5B%5D%7D%2C%7B%22point%22:%5B69568%2C46118%2C1720%5D%2C%22type%22:%22point%22%2C%22id%22:%222de1fa3bf458c13b02abad54991cf8afc88f37927%22%2C%22tagIds%22:%5B%5D%7D%2C%7B%22point%22:%5B71163%2C45428%2C1709%5D%2C%22type%22:%22point%22%2C%22id%22:%22759d7bc55c5ad9a6b635d9c47d42846d0c1aa0e6%22%2C%22tagIds%22:%5B%5D%7D%2C%7B%22point%22:%5B71348%2C45509%2C1697%5D%2C%22type%22:%22point%22%2C%22id%22:%223060a4c188c067630ad8e9e10bcf65c4f974a6ce%22%2C%22tagIds%22:%5B%5D%7D%2C%7B%22point%22:%5B71500%2C45504%2C1685%5D%2C%22type%22:%22point%22%2C%22id%22:%22282489e51cca9e177c554224d6faf02fabf69b869%22%2C%22tagIds%22:%5B%5D%7D%2C%7B%22point%22:%5B69859%2C46089%2C1685%5D%2C%22type%22:%22point%22%2C%22id%22:%22e64414f853ed78ee98180e535d737a617795b2dc%22%2C%22tagIds%22:%5B%5D%7D%2C%7B%22point%22:%5B69946%2C46073%2C1675%5D%2C%22type%22:%22point%22%2C%22id%22:%2228ec72ae1a6f1b807677efb9c2c5e1dd88812b8d5%22%2C%22tagIds%22:%5B%5D%7D%2C%7B%22point%22:%5B71514%2C45450%2C1673%5D%2C%22type%22:%22point%22%2C%22id%22:%222655fb3d49760bf9db1e03e7ec745a4a503354334%22%2C%22tagIds%22:%5B%5D%7D%2C%7B%22point%22:%5B71609%2C45479%2C1663%5D%2C%22type%22:%22point%22%2C%22id%22:%22dc1cd10b3f664fbec2be8fa7302f790af079e486%22%2C%22tagIds%22:%5B%5D%7D%2C%7B%22point%22:%5B70064%2C46078%2C1663%5D%2C%22type%22:%22point%22%2C%22id%22:%22730d35b84b1f83310ed41405f22633ce63623e51%22%2C%22tagIds%22:%5B%5D%7D%2C%7B%22point%22:%5B71699%2C45503%2C1653%5D%2C%22type%22:%22point%22%2C%22id%22:%2231172498965e1ed32082abade3bba052c0ddb989%22%2C%22tagIds%22:%5B%5D%7D%2C%7B%22point%22:%5B70135%2C46073%2C1653%5D%2C%22type%22:%22point%22%2C%22id%22:%2225e7f5245774edd3b593ad91d35f77306732df01b%22%2C%22tagIds%22:%5B%5D%7D%2C%7B%22point%22:%5B70206%2C46073%2C1642%5D%2C%22type%22:%22point%22%2C%22id%22:%2225885f9bfcbacd7bbf0172d6e4b655b7dbc136dff%22%2C%22tagIds%22:%5B%5D%7D%2C%7B%22point%22:%5B70268%2C46034%2C1632%5D%2C%22type%22:%22point%22%2C%22id%22:%2278fda87abc0bfa677b98e3a7963f9476a1406f2c%22%2C%22tagIds%22:%5B%5D%7D%2C%7B%22point%22:%5B71875%2C45511%2C1632%5D%2C%22type%22:%22point%22%2C%22id%22:%227e3f544ad8f29b9500956a8b4ef727c7644ab588%22%2C%22tagIds%22:%5B%5D%7D%2C%7B%22point%22:%5B70334%2C46029%2C1619%5D%2C%22type%22:%22point%22%2C%22id%22:%22b9588db0aa584dfec99cc7daf794935e81fd8069%22%2C%22tagIds%22:%5B%5

D%7D%2C%7B%22point%22:%5B71946%2C45492%2C1619%5D%2C%22type%22:%22point%22%2C%22id%22:%22b3caa77fd127d9d0855971b286da1f9b8c4b576b%22%2C%22tagIds%22:%5B%5D%7D%2C%7B%22point%22:%5B70396%2C46000%2C1609%5D%2C%22type%22:%22point%22%2C%22id%22:%22a53a7764359549e4db68666cbd008a7790f7e492%22%2C%22tagIds%22:%5B%5D%7D%2C%7B%22point%22:%5B72022%2C45496%2C1609%5D%2C%22type%22:%22point%22%2C%22id%22:%229fc67268fb50c1c5083b2ddb82ab9642e5002f4c%22%2C%22tagIds%22:%5B%5D%7D%2C%7B%22point%22:%5B72116%2C45504%2C1599%5D%2C%22type%22:%22point%22%2C%22id%22:%22ff89e02588222cc58bc6f9c0018a49fa7c7b9613%22%2C%22tagIds%22:%5B%5D%7D%2C%7B%22point%22:%5B70442%2C45979%2C1599%5D%2C%22type%22:%22point%22%2C%22id%22:%22af0bd16169b18da9d7b4fea49c357111eaf4f876%22%2C%22tagIds%22:%5B%5D%7D%2C%7B%22point%22:%5B72158%2C45498%2C1587%5D%2C%22type%22:%22point%22%2C%22id%22:%227dec38e15e2d9c83a224a8190b8420a57f5cd773%22%2C%22tagIds%22:%5B%5D%7D%2C%7B%22point%22:%5B70508%2C45983%2C1587%5D%2C%22type%22:%22point%22%2C%22id%22:%22d03cfb6fb22cc298048a6ef5be160c893d773e9f%22%2C%22tagIds%22:%5B%5D%7D%2C%7B%22point%22:%5B72272%2C45551%2C1575%5D%2C%22type%22:%22point%22%2C%22id%22:%2200db9f6bee5437e85cfb3ffbf8258bdf0fe1ebf3%22%2C%22tagIds%22:%5B%5D%7D%2C%7B%22point%22:%5B70551%2C45945%2C1575%5D%2C%22type%22:%22point%22%2C%22id%22:%22822d113465be03916617643dcfe2918ca26c6f11%22%2C%22tagIds%22:%5B%5D%7D%2C%7B%22point%22:%5B72348%2C45574%2C1563%5D%2C%22type%22:%22point%22%2C%22id%22:%224b8542e429511a8ded78366f593353a7b94a64cc%22%2C%22tagIds%22:%5B%5D%7D%2C%7B%22point%22:%5B70537%2C45879%2C1563%5D%2C%22type%22:%22point%22%2C%22id%22:%2248c3f93b90c4f18a6bc73cf80cf221548e4e9e09%22%2C%22tagIds%22:%5B%5D%7D%2C%7B%22point%22:%5B70491%2C45748%2C1551%5D%2C%22type%22:%22point%22%2C%22id%22:%224beff6405297da2856499203137b865783d3b025%22%2C%22tagIds%22:%5B%5D%7D%2C%7B%22point%22:%5B72393%2C45568%2C1551%5D%2C%22type%22:%22point%22%2C%22id%22:%22dfa2d7708436a81f83ba192302e9befc3a043307%22%2C%22tagIds%22:%5B%5D%7D%2C%7B%22point%22:%5B72427%2C45587%2C1541%5D%2C%22type%22:%22point%22%2C%22id%22:%2228e0f89eff70cf6ccdfdfa4443f93b020bec6878%22%2C%22tagIds%22:%5B%5D%7D%2C%7B%22point%22:%5B70439%2C45634%2C1541%5D%2C%22type%22:%22point%22%2C%22id%22:%22a7c67f2118c116979d22e9498751e78ed71c84ac%22%2C%22tagIds%22:%5B%5D%7D%2C%7B%22point%22:%5B70332%2C45414%2C1529%5D%2C%22type%22:%22point%22%2C%22id%22:%22ea844fa9a334bc002feb00f68a287782a543c7bc%22%2C%22tagIds%22:%5B%5D%7D%2C%7B%22point%22:%5B57976%2C68150%2C803%5D%2C%22type%22:%22point%22%2C%22id%22:%224c1e196b15bc602624d6a5cac151586ea45c9dca%22%2C%22tagIds%22:%5B%5D%7D%2C%7B%22point%22:%5B59550%2C68918%2C803%5D%2C%22type%22:%22point%22%2C%22id%22:%224367ccadcc3343592064178aef9fe52e3532a07c%22%2C%22tagIds%22:%5B%5D%7D%2C%7B%22point%22:%5B59975%2C68490%2C803%5D%2C%22type%22:%22point%22%2C%22id%22:%221f0adc4a5b7c8117b41059c6c385459b62255c18%22%2C%22tagIds%22:%5B%5D%7D%2C%7B%22point%22:%5B59865%2C68506%2C813%5D%2C%22type%22:%22point%22%2C%22id%22:%22c6afbf031475f058d417984f099ee9db2aa0c91%22%2C%22tagIds%22:%5B%5D%7D%2C%7B%22point%22:%5B59555%2C68872%2C813%5D%2C%22type%22:%22point%22%2C%22id%22:%225d40d11bdc2d120e07a6dfa5caf21e18274cf95c%22%2C%22tagIds%22:%5B%5D%7D%2C%7B%22point%22:%5B57898%2C68033%2C813%5D%2C%22type%22:%22point%22%2C%22id%22:%22673bc4766769831b6011813044dbb4cdb8ead36d%22%2C%22tagIds%22:%5B%5D%7D%2C%7B%22point%22:%5B59784%2C68501%2C823%5D%2C%22type%22:%22point%22%2C%22id%22:%226da3967e118a472845ba15a799c881ebc5da9052%22%2C%22tagIds%22:%5B%5D%7D%2C%7B%22point%22:%5B59535%2C68852%2C823%5D%2C%22type%22:%22point%22%2C%22id%22:%2209

d8454ca9c4faedff61648a3022a47d575ff6a3%22%2C%22tagIds%22:%5B%5D%7D%2C%7B%22point%22:%5B57913%2C68069%2C823%5D%2C%22type%22:%22point%22%2C%22id%22:%2255c1a5361d2a5d65d0f5d1daeb45b0102485cfe1%22%2C%22tagIds%22:%5B%5D%7D%2C%7B%22point%22:%5B59713%2C68491%2C833%5D%2C%22type%22:%22point%22%2C%22id%22:%22f739668e7d9b1a0f8e32d1d9a0ef099e2234eb4%22%2C%22tagIds%22:%5B%5D%7D%2C%7B%22point%22:%5B57924%2C68130%2C833%5D%2C%22type%22:%22point%22%2C%22id%22:%22a793e0f8d3ed0dace48660a292066e7e2cb0c053%22%2C%22tagIds%22:%5B%5D%7D%2C%7B%22point%22:%5B59494%2C68776%2C833%5D%2C%22type%22:%22point%22%2C%22id%22:%22557afbeb812643a359664baf61061f38f330040e%22%2C%22tagIds%22:%5B%5D%7D%2C%7B%22point%22:%5B57827%2C67998%2C843%5D%2C%22type%22:%22point%22%2C%22id%22:%22b45e8e59b86b3e1f2a963c5e59bf60f483cb45b5%22%2C%22tagIds%22:%5B%5D%7D%2C%7B%22point%22:%5B59586%2C68486%2C843%5D%2C%22type%22:%22point%22%2C%22id%22:%22bc6bda613109f4d727e41a40f16d8a52f2a85170%22%2C%22tagIds%22:%5B%5D%7D%2C%7B%22point%22:%5B59433%2C68750%2C843%5D%2C%22type%22:%22point%22%2C%22id%22:%22fd461f860b6c6eac033b321d4fad65fdbfddac0%22%2C%22tagIds%22:%5B%5D%7D%2C%7B%22point%22:%5B57776%2C67971%2C853%5D%2C%22type%22:%22point%22%2C%22id%22:%228c06b517d5aad56d0b789a4b5e41641132b5a18f%22%2C%22tagIds%22:%5B%5D%7D%2C%7B%22point%22:%5B59484%2C68372%2C853%5D%2C%22type%22:%22point%22%2C%22id%22:%2210229c673cb4840cdb8404dc44e11b5dbb9f5a43%22%2C%22tagIds%22:%5B%5D%7D%2C%7B%22point%22:%5B59357%2C68718%2C853%5D%2C%22type%22:%22point%22%2C%22id%22:%224ae5a4a9a93d5175be11db283446d6c1880f60e4%22%2C%22tagIds%22:%5B%5D%7D%2C%7B%22point%22:%5B59345%2C68158%2C863%5D%2C%22type%22:%22point%22%2C%22id%22:%22df99ce1638862572903af8bf363ac24f9ab0890f%22%2C%22tagIds%22:%5B%5D%7D%2C%7B%22point%22:%5B57765%2C67975%2C863%5D%2C%22type%22:%22point%22%2C%22id%22:%22a27a0b49fc8c2e2b627d9211df1efe34c821b12e%22%2C%22tagIds%22:%5B%5D%7D%2C%7B%22point%22:%5B58719%2C68068%2C880%5D%2C%22type%22:%22point%22%2C%22id%22:%228763f719d09e00d32c510323d84215bc9738f4e8%22%2C%22tagIds%22:%5B%5D%7D%2C%7B%22point%22:%5B57453%2C67946%2C880%5D%2C%22type%22:%22point%22%2C%22id%22:%225304bc95188ef2991f6641835933a43958c8b9de%22%2C%22tagIds%22:%5B%5D%7D%2C%7B%22point%22:%5B57640%2C67967%2C895%5D%2C%22type%22:%22point%22%2C%22id%22:%224b05aea0ff9c1d8cf9962b7c2e954d4836ecac9c%22%2C%22tagIds%22:%5B%5D%7D%2C%7B%22point%22:%5B57464%2C67832%2C904%5D%2C%22type%22:%22point%22%2C%22id%22:%22a10049bdbad5bce51cae4c9cef30c44163584441%22%2C%22tagIds%22:%5B%5D%7D%2C%7B%22point%22:%5B57357%2C67719%2C915%5D%2C%22type%22:%22point%22%2C%22id%22:%227b87eb44dd8d8035fce50608c232fa178c5a0272%22%2C%22tagIds%22:%5B%5D%7D%2C%7B%22point%22:%5B57321%2C67657%2C926%5D%2C%22type%22:%22point%22%2C%22id%22:%22a01235bc6b2d60d7b07f1423f359834c8b4176cf%22%2C%22tagIds%22:%5B%5D%7D%2C%7B%22point%22:%5B57189%2C67617%2C937%5D%2C%22type%22:%22point%22%2C%22id%22:%222756d86c04a7da62daf89284cf54e3d7dbcdb3a9%22%2C%22tagIds%22:%5B%5D%7D%2C%7B%22point%22:%5B57113%2C67556%2C946%5D%2C%22type%22:%22point%22%2C%22id%22:%224cc1c078560d2833129a680f6813b3372ef48f26%22%2C%22tagIds%22:%5B%5D%7D%2C%7B%22point%22:%5B57043%2C67518%2C955%5D%2C%22type%22:%22point%22%2C%22id%22:%22fedef2530c0c2d9d89ffcf7c7bad46e63210ef%22%2C%22tagIds%22:%5B%5D%7D%2C%7B%22point%22:%5B56927%2C67450%2C965%5D%2C%22type%22:%22point%22%2C%22id%22:%22767b37fe70d2314f7807079fd5495dc1a5e82850%22%2C%22tagIds%22:%5B%5D%7D%2C%7B%22point%22:%5B56775%2C67366%2C974%5D%2C%22type%22:%22point%22%2C%22id%22:%22dae248e27bbb6e4b3135a4434f1360056672826d%22%2C%22tagIds%22:%5B%5D%7D%2C%7B%22point%22:%5B56584%2C67259%

2C989%5D%2C%22type%22:%22point%22%2C%22id%22:%22d1de6d7dd12dc50b812df2e00dc6dd0f5d700125%22%2C%22tagIds%22:%5B%5D%7D%2C%7B%22point%22:%5B56510%2C67208%2C998%5D%2C%22type%22:%22point%22%2C%22id%22:%22186237479a0b315b3e437394e1ae718197e72237%22%2C%22tagIds%22:%5B%5D%7D%2C%7B%22point%22:%5B56484%2C67170%2C1009%5D%2C%22type%22:%22point%22%2C%22id%22:%222878344ccce673a3e8d33ddfae5c513356816690%22%2C%22tagIds%22:%5B%5D%7D%2C%7B%22point%22:%5B56447%2C67117%2C1019%5D%2C%22type%22:%22point%22%2C%22id%22:%22f8836228a4e71acabacc10d6e6843d2ae2cb8e73%22%2C%22tagIds%22:%5B%5D%7D%2C%7B%22point%22:%5B56249%2C66966%2C1037%5D%2C%22type%22:%22point%22%2C%22id%22:%227e50a6b66c5c221a72d0ae4bd149acfc1f35e170%22%2C%22tagIds%22:%5B%5D%7D%2C%7B%22point%22:%5B55189%2C66247%2C1037%5D%2C%22type%22:%22point%22%2C%22id%22:%22846187ed3a63191d531efc5ca01e4f52deb37a74%22%2C%22tagIds%22:%5B%5D%7D%2C%7B%22point%22:%5B56138%2C66908%2C1047%5D%2C%22type%22:%22point%22%2C%22id%22:%2262b367b5219836f7d8506756da11fb5b72bfa079%22%2C%22tagIds%22:%5B%5D%7D%2C%7B%22point%22:%5B55076%2C66220%2C1047%5D%2C%22type%22:%22point%22%2C%22id%22:%220d404cb787d04359daf225694db9d3e43cd7bd71%22%2C%22tagIds%22:%5B%5D%7D%2C%7B%22point%22:%5B56062%2C66844%2C1056%5D%2C%22type%22:%22point%22%2C%22id%22:%22a632081d7e554e99193b294345b223a19a22e3a1%22%2C%22tagIds%22:%5B%5D%7D%2C%7B%22point%22:%5B54962%2C66148%2C1056%5D%2C%22type%22:%22point%22%2C%22id%22:%22a6008a1f133cf9b5d8a283d17ec5d8dc87165576%22%2C%22tagIds%22:%5B%5D%7D%2C%7B%22point%22:%5B55987%2C66776%2C1066%5D%2C%22type%22:%22point%22%2C%22id%22:%2204e8bee3424361bea1dc99a835fc061031a4e468%22%2C%22tagIds%22:%5B%5D%7D%2C%7B%22point%22:%5B55983%2C66704%2C1077%5D%2C%22type%22:%22point%22%2C%22id%22:%222148a70f1d2935fec82f4609dec049983fd9485%22%2C%22tagIds%22:%5B%5D%7D%2C%7B%22point%22:%5B54761%2C65993%2C1077%5D%2C%22type%22:%22point%22%2C%22id%22:%22545d28ae683cca1421fefaed1518d08c6746dd51%22%2C%22tagIds%22:%5B%5D%7D%2C%7B%22point%22:%5B54652%2C65935%2C1087%5D%2C%22type%22:%22point%22%2C%22id%22:%229c05fa8cdcd7071f9156e459e367c559284147c0%22%2C%22tagIds%22:%5B%5D%7D%2C%7B%22point%22:%5B55904%2C66658%2C1087%5D%2C%22type%22:%22point%22%2C%22id%22:%22db55e750484989c590f29cbaeb85de01e137c2c5%22%2C%22tagIds%22:%5B%5D%7D%2C%7B%22point%22:%5B54547%2C65874%2C1097%5D%2C%22type%22:%22point%22%2C%22id%22:%22faf1b87c941ea0796a6aaee89bb3708fc0da5e3f%22%2C%22tagIds%22:%5B%5D%7D%2C%7B%22point%22:%5B55867%2C66600%2C1097%5D%2C%22type%22:%22point%22%2C%22id%22:%229f67ff8bc178d5ab0cbdc4b2c152c53b4bc66e28%22%2C%22tagIds%22:%5B%5D%7D%2C%7B%22point%22:%5B54449%2C65793%2C1107%5D%2C%22type%22:%22point%22%2C%22id%22:%2200a79c609e2ad47edc2f284cbd070d2b795b04af%22%2C%22tagIds%22:%5B%5D%7D%2C%7B%22point%22:%5B55833%2C66538%2C1107%5D%2C%22type%22:%22point%22%2C%22id%22:%221b668e22d7f55309422ae16a7d82e1219f54e6a8%22%2C%22tagIds%22:%5B%5D%7D%2C%7B%22point%22:%5B55764%2C66480%2C1117%5D%2C%22type%22:%22point%22%2C%22id%22:%224aaf8beb67a213f74bb2252a104733e24c27474c%22%2C%22tagIds%22:%5B%5D%7D%2C%7B%22point%22:%5B54308%2C65626%2C1117%5D%2C%22type%22:%22point%22%2C%22id%22:%220d767927c1a700c4eacb42141754dcdb3561f9f7%22%2C%22tagIds%22:%5B%5D%7D%2C%7B%22point%22:%5B54198%2C65523%2C1127%5D%2C%22type%22:%22point%22%2C%22id%22:%22d1eefa6c370784e8917745bb2c7b714bfcfc7a8a%22%2C%22tagIds%22:%5B%5D%7D%2C%7B%22point%22:%5B55646%2C66401%2C1127%5D%2C%22type%22:%22point%22%2C%22id%22:%225de972fc208717656cc5081178754b36d2adcd2a%22%2C%22tagIds%22:%5B%5D%7D%2C%7B%22point%22:%5B55548%2C66302%2C1137%5D%2C%22type%22:%22point%22%2C%22id%22:%2288db999eeb8c07c0273bd32bf

9333e2e18e3946%22%2C%22tagIds%22:%5B%5D%7D%2C%7B%22point%22:%5B53986%2C65236%2C1137%5D%2C%22type%22:%22point%22%2C%22id%22:%22c17addb2c4aa291a41c168e9a4eab0ba62fd8f31%22%2C%22tagIds%22:%5B%5D%7D%2C%7B%22point%22:%5B5435%2C66216%2C1148%5D%2C%22type%22:%22point%22%2C%22id%22:%226d64dcc2b0f87b7f473620b8bcfcdf9191115b3%22%2C%22tagIds%22:%5B%5D%7D%2C%7B%22point%22:%5B53794%2C64919%2C1148%5D%2C%22type%22:%22point%22%2C%22id%22:%22a145c4380a7caf41a46f3452fba36b3c8d84baa0%22%2C%22tagIds%22:%5B%5D%7D%2C%7B%22point%22:%5B55291%2C66116%2C1161%5D%2C%22type%22:%22point%22%2C%22id%22:%2219e2a110bf14d07e6a34052d41cbb440d16b7346%22%2C%22tagIds%22:%5B%5D%7D%2C%7B%22point%22:%5B53600%2C64498%2C1161%5D%2C%22type%22:%22point%22%2C%22id%22:%2249177b0cff7b1c967b41f5c5528812e8bf88412f%22%2C%22tagIds%22:%5B%5D%7D%2C%7B%22point%22:%5B55163%2C66047%2C1169%5D%2C%22type%22:%22point%22%2C%22id%22:%2241a91c2b2ec09e5c774b83896bff01a3190ba784%22%2C%22tagIds%22:%5B%5D%7D%2C%7B%22point%22:%5B53456%2C64438%2C1169%5D%2C%22type%22:%22point%22%2C%22id%22:%22458121c600bd5a88d7df5bb4c9304f57b7c0ac70%22%2C%22tagIds%22:%5B%5D%7D%2C%7B%22point%22:%5B55109%2C65963%2C1178%5D%2C%22type%22:%22point%22%2C%22id%22:%2283b48aa6ca0a90cbaf78db32adb4eea0277f37d3%22%2C%22tagIds%22:%5B%5D%7D%2C%7B%22point%22:%5B54922%2C65866%2C1187%5D%2C%22type%22:%22point%22%2C%22id%22:%22c25dc1b45a12254e4481e9dd1de11fd3fdd568f8%22%2C%22tagIds%22:%5B%5D%7D%2C%7B%22point%22:%5B54686%2C65732%2C1198%5D%2C%22type%22:%22point%22%2C%22id%22:%223191595439a1190287761e53aaf04bd7f6ab073d%22%2C%22tagIds%22:%5B%5D%7D%2C%7B%22point%22:%5B54426%2C65441%2C1220%5D%2C%22type%22:%22point%22%2C%22id%22:%2287292d02085e1fe8a06e67c81d5baef80b74a067%22%2C%22tagIds%22:%5B%5D%7D%2C%7B%22point%22:%5B54149%2C65285%2C1230%5D%2C%22type%22:%22point%22%2C%22id%22:%22455585cb215b39b08e7ee82ea6b63b649d9e09a7%22%2C%22tagIds%22:%5B%5D%7D%2C%7B%22point%22:%5B54071%2C65153%2C1244%5D%2C%22type%22:%22point%22%2C%22id%22:%22d640c192ba51d970f19112b89501c4224c586a39%22%2C%22tagIds%22:%5B%5D%7D%2C%7B%22point%22:%5B53857%2C64899%2C1254%5D%2C%22type%22:%22point%22%2C%22id%22:%22442cd2504b3a7bd0d324162e3d2b9ba0204e6992%22%2C%22tagIds%22:%5B%5D%7D%2C%7B%22point%22:%5B53828%2C64815%2C1264%5D%2C%22type%22:%22point%22%2C%22id%22:%222177b55ebc354fee876e6daf3558b0a4aae9ac6f%22%2C%22tagIds%22:%5B%5D%7D%2C%7B%22point%22:%5B50913%2C62520%2C1268%5D%2C%22type%22:%22point%22%2C%22id%22:%22166249dc49a7062aff31464669ec07dd184ae208%22%2C%22tagIds%22:%5B%5D%7D%2C%7B%22point%22:%5B53786%2C64612%2C1280%5D%2C%22type%22:%22point%22%2C%22id%22:%227a6437df169051edfa77694c7c96f461d7fc8ea2%22%2C%22tagIds%22:%5B%5D%7D%2C%7B%22point%22:%5B50627%2C62282%2C1283%5D%2C%22type%22:%22point%22%2C%22id%22:%223a2bf4b58258cd0707e4a907f596129edeabd650%22%2C%22tagIds%22:%5B%5D%7D%2C%7B%22point%22:%5B53732%2C64383%2C1293%5D%2C%22type%22:%22point%22%2C%22id%22:%22b4d85d7fc5c9324e43433170d4cdc5e615476ebe%22%2C%22tagIds%22:%5B%5D%7D%2C%7B%22point%22:%5B50493%2C62188%2C1293%5D%2C%22type%22:%22point%22%2C%22id%22:%22d25265334d877df13847764320ecff1d6bbc0442%22%2C%22tagIds%22:%5B%5D%7D%2C%7B%22point%22:%5B50389%2C62049%2C1303%5D%2C%22type%22:%22point%22%2C%22id%22:%224b45c64ad07314f1e1dc63907553ce24220ea911%22%2C%22tagIds%22:%5B%5D%7D%2C%7B%22point%22:%5B53655%2C63952%2C1315%5D%2C%22type%22:%22point%22%2C%22id%22:%2289f0301fc5e14d7b84d6b381e26962e1169efc13%22%2C%22tagIds%22:%5B%5D%7D%2C%7B%22point%22:%5B50257%2C61891%2C1315%5D%2C%22type%22:%22point%22%2C%22id%22:%2204d7bb9e9a1bd19ac4d64a0dd13e1110f5bacf69%22%2C%22tagIds%22:%5B%5D%7D%2C%7B%22point%22:%5B52372%2C61902%2

C1318%5D%2C%22type%22:%22point%22%2C%22id%22:%228c9e4fdf22d031952d6820489e96a3931917053b%22%2C%22tagIds%22:%5B%5D%7D%2C%7B%22point%22:%5B52247%2C61734%2C1327%5D%2C%22type%22:%22point%22%2C%22id%22:%2280dd38d5a0d8bcd99986d5210c74e46ecd2e7fd0%22%2C%22tagIds%22:%5B%5D%7D%2C%7B%22point%22:%5B50142%2C61663%2C1327%5D%2C%22type%22:%22point%22%2C%22id%22:%22500ec7260200d030463bb71bcb70f5aee2422939%22%2C%22tagIds%22:%5B%5D%7D%2C%7B%22point%22:%5B53537%2C63881%2C1327%5D%2C%22type%22:%22point%22%2C%22id%22:%2287b234e5738bc16814124af50f10ead503a6c6d%22%2C%22tagIds%22:%5B%5D%7D%2C%7B%22point%22:%5B53472%2C63733%2C1337%5D%2C%22type%22:%22point%22%2C%22id%22:%2264da4b7df7e6a3f5587406623a157d8988a41bca%22%2C%22tagIds%22:%5B%5D%7D%2C%7B%22point%22:%5B52041%2C61450%2C1337%5D%2C%22type%22:%22point%22%2C%22id%22:%22ed3b46bf867b8755cc2f340b77594056de2ab4aa%22%2C%22tagIds%22:%5B%5D%7D%2C%7B%22point%22:%5B50135%2C61507%2C1337%5D%2C%22type%22:%22point%22%2C%22id%22:%229aac8f8dbd5e8b5719d7b120678d68fc0a58bf53%22%2C%22tagIds%22:%5B%5D%7D%2C%7B%22point%22:%5B51623%2C61037%2C1351%5D%2C%22type%22:%22point%22%2C%22id%22:%22b8bc88278f19907e1bdfde791119dced7a739108%22%2C%22tagIds%22:%5B%5D%7D%2C%7B%22point%22:%5B53366%2C63308%2C1351%5D%2C%22type%22:%22point%22%2C%22id%22:%22141c04c70d16c1e57e7ecd1c2b7d7dd0781119ab%22%2C%22tagIds%22:%5B%5D%7D%2C%7B%22point%22:%5B52528%2C62168%2C1370%5D%2C%22type%22:%22point%22%2C%22id%22:%2202420e8c9f6e418759296d126ceb51d2478fdd95%22%2C%22tagIds%22:%5B%5D%7D%2C%7B%22point%22:%5B52404%2C62037%2C1381%5D%2C%22type%22:%22point%22%2C%22id%22:%2284ecaf97841ca1ad6e9dbb9faf8dc9be95740164%22%2C%22tagIds%22:%5B%5D%7D%2C%7B%22point%22:%5B50020%2C60388%2C1386%5D%2C%22type%22:%22point%22%2C%22id%22:%22d9d271714dc1203c826c8ae5b521d7cc0858fcc3%22%2C%22tagIds%22:%5B%5D%7D%2C%7B%22point%22:%5B50080%2C60229%2C1393%5D%2C%22type%22:%22point%22%2C%22id%22:%2253fac26bb65ccea2dfbdeba49db2494ecb69ac23%22%2C%22tagIds%22:%5B%5D%7D%2C%7B%22point%22:%5B50053%2C60073%2C1403%5D%2C%22type%22:%22point%22%2C%22id%22:%2220d9a652fc8f8d112a829a3d00629abccb4494a4%22%2C%22tagIds%22:%5B%5D%7D%2C%7B%22point%22:%5B51714%2C61281%2C1406%5D%2C%22type%22:%22point%22%2C%22id%22:%225cf29f2b9b5ab70b17840b20dfc831b1ee2a2279%22%2C%22tagIds%22:%5B%5D%7D%2C%7B%22point%22:%5B51032%2C60375%2C1406%5D%2C%22type%22:%22point%22%2C%22id%22:%22489b8acc4085639a7c8b58706c567d75f3e4e513%22%2C%22tagIds%22:%5B%5D%7D%2C%7B%22point%22:%5B51485%2C60962%2C1416%5D%2C%22type%22:%22point%22%2C%22id%22:%2225024469fefb3edc64faafadd37bfd20f52ca594%22%2C%22tagIds%22:%5B%5D%7D%2C%7B%22point%22:%5B50937%2C60228%2C1417%5D%2C%22type%22:%22point%22%2C%22id%22:%2240d998ef2acca99cc64528e69585928d6caefb65%22%2C%22tagIds%22:%5B%5D%7D%2C%7B%22point%22:%5B50931%2C60179%2C1425%5D%2C%22type%22:%22point%22%2C%22id%22:%2290514a01215546d776c58b883877374a3b9311ae%22%2C%22tagIds%22:%5B%5D%7D%2C%7B%22point%22:%5B51401%2C60844%2C1425%5D%2C%22type%22:%22point%22%2C%22id%22:%220d66e8660e9ca2b086bffc71908bc2566f951b96%22%2C%22tagIds%22:%5B%5D%7D%2C%7B%22point%22:%5B50896%2C60127%2C1434%5D%2C%22type%22:%22point%22%2C%22id%22:%22e7f5436e94285d0b0f8ffdac5cc7ea78542aa9d5%22%2C%22tagIds%22:%5B%5D%7D%2C%7B%22point%22:%5B51336%2C60745%2C1434%5D%2C%22type%22:%22point%22%2C%22id%22:%22ffbbd043916071310b053a82f7ee2b6c094a9a30%22%2C%22tagIds%22:%5B%5D%7D%2C%7B%22point%22:%5B51235%2C60573%2C1444%5D%2C%22type%22:%22point%22%2C%22id%22:%227cd5c064218a70960d75d2941a269b556a066653%22%2C%22tagIds%22:%5B%5D%7D%2C%7B%22point%22:%5B50876%2C60050%2C1440%5D%2C%22type%22:%22point%22%2C%22id%22:%2239e0231974e75748f0d14297550e

a78165cafdec%22%2C%22tagIds%22:%5B%5D%7D%2C%7B%22point%22:%5B50699%2C59877%2C1449%5D%2C%22type%22:%22point%22%2C%22id%22:%22126fb7ff54ea94e6be080fec5da030812b7f1cca%22%2C%22tagIds%22:%5B%5D%7D%2C%7B%22point%22:%5B51183%2C60473%2C1449%5D%2C%22type%22:%22point%22%2C%22id%22:%22f107e00de9ef552c9e20c0d2e957d35cd5007cba%22%2C%22tagIds%22:%5B%5D%7D%2C%7B%22point%22:%5B51543%2C62738%2C1249%5D%2C%22type%22:%22point%22%2C%22id%22:%221659474c1ee2ec528846082bdbbe2eca4d0bf552%22%2C%22tagIds%22:%5B%5D%7D%2C%7B%22point%22:%5B94555%2C57431%2C2001%5D%2C%22type%22:%22point%22%2C%22id%22:%226ca46b58bf0d61491ebe315c20cefd5520c9fef%22%2C%22tagIds%22:%5B%5D%7D%2C%7B%22point%22:%5B62486%2C48657%2C993%5D%2C%22type%22:%22point%22%2C%22id%22:%226af798ce7c9166b43cfbf1c3397d6980dfcc6b84%22%2C%22tagIds%22:%5B%5D%7D%2C%7B%22point%22:%5B62473%2C48683%2C981%5D%2C%22type%22:%22point%22%2C%22id%22:%22e501be6d73a5f6e528fa63cb978b080ee583e96d%22%2C%22tagIds%22:%5B%5D%7D%2C%7B%22point%22:%5B62461%2C48732%2C971%5D%2C%22type%22:%22point%22%2C%22id%22:%22c1929c4ccac5e23ecc69446ddccbeda05d39148%22%2C%22tagIds%22:%5B%5D%7D%2C%7B%22point%22:%5B62464%2C48758%2C961%5D%2C%22type%22:%22point%22%2C%22id%22:%221b596cb406b240810c48d91c64ebe6cbb9405756%22%2C%22tagIds%22:%5B%5D%7D%2C%7B%22point%22:%5B62429%2C48802%2C950%5D%2C%22type%22:%22point%22%2C%22id%22:%2277ceda034d855db61a42c555fcfb533e1385f892%22%2C%22tagIds%22:%5B%5D%7D%2C%7B%22point%22:%5B62415%2C48845%2C940%5D%2C%22type%22:%22point%22%2C%22id%22:%222d1a2494ca04ab06c1be3fbfc36acaa7634ac01c%22%2C%22tagIds%22:%5B%5D%7D%2C%7B%22point%22:%5B62392%2C48874%2C930%5D%2C%22type%22:%22point%22%2C%22id%22:%224d51452b71dd21b60b5f7f8f1c3915d0d9f464a4%22%2C%22tagIds%22:%5B%5D%7D%2C%7B%22point%22:%5B62352%2C48893%2C923%5D%2C%22type%22:%22point%22%2C%22id%22:%224ec0b8e24359cf1e06fc304298bf3aa681204d60%22%2C%22tagIds%22:%5B%5D%7D%2C%7B%22point%22:%5B62276%2C48916%2C913%5D%2C%22type%22:%22point%22%2C%22id%22:%229248c4524cd62679b6820b3868020a177029cf6c%22%2C%22tagIds%22:%5B%5D%7D%2C%7B%22point%22:%5B62244%2C48957%2C903%5D%2C%22type%22:%22point%22%2C%22id%22:%22fa05c81b22b2c3c34a818d076b6547519a73f5db%22%2C%22tagIds%22:%5B%5D%7D%2C%7B%22point%22:%5B62195%2C49014%2C896%5D%2C%22type%22:%22point%22%2C%22id%22:%2254b57c07ccf6385b2f929bce935026f1ac75755e%22%2C%22tagIds%22:%5B%5D%7D%2C%7B%22point%22:%5B62026%2C49082%2C884%5D%2C%22type%22:%22point%22%2C%22id%22:%2297bbaab8aa8abc9144c9407fba2fff95c66982ba%22%2C%22tagIds%22:%5B%5D%7D%2C%7B%22point%22:%5B61801%2C49215%2C869%5D%2C%22type%22:%22point%22%2C%22id%22:%22bc9d8a3e5904a60a4cefb94bc8073814cee3e364%22%2C%22tagIds%22:%5B%5D%7D%2C%7B%22point%22:%5B61837%2C49265%2C862%5D%2C%22type%22:%22point%22%2C%22id%22:%2276923f153cf89ff02b7147733a79ecfe00d36c46%22%2C%22tagIds%22:%5B%5D%7D%2C%7B%22point%22:%5B61776%2C49331%2C852%5D%2C%22type%22:%22point%22%2C%22id%22:%2248f169dd1dd77f276ecfa6c9515556fa8ad429e9%22%2C%22tagIds%22:%5B%5D%7D%2C%7B%22point%22:%5B61717%2C49401%2C842%5D%2C%22type%22:%22point%22%2C%22id%22:%228c6ecf6c25bf689ed8786c98cfaba9a52ce524fe%22%2C%22tagIds%22:%5B%5D%7D%2C%7B%22point%22:%5B77905%2C62386%2C858%5D%2C%22type%22:%22point%22%2C%22id%22:%2233b376276e55689126f7385c5e5cdd40dd9530dc%22%2C%22tagIds%22:%5B%5D%7D%2C%7B%22point%22:%5B77919%2C62408%2C853%5D%2C%22type%22:%22point%22%2C%22id%22:%2287615cb05ff19996590d8b79ebe6374d54bdfdf6b%22%2C%22tagIds%22:%5B%5D%7D%2C%7B%22point%22:%5B77930%2C62408%2C847%5D%2C%22type%22:%22point%22%2C%22id%22:%22963285705adb10da399779fd61164d9459153097%22%2C%22tagIds%22:%5B%5D%7D%2C%7B%22point%22:%5B77948%2C62459%2C838%5D%2C%22type%

22:%22point%22%2C%22id%22:%22613dd9dee232186892b6ca58212c3d0437f19391%22%2C%22tagIds%22:%22%5B%5D%7D%2C%7B%22point%22:%22%5B77940%2C62579%2C828%5D%2C%22type%22:%22point%22%2C%22id%22:%221d70751735d3e771badb70d99a885c59db9778ae%22%2C%22tagIds%22:%22%5B%5D%7D%2C%7B%22point%22:%22%5B77909%2C62744%2C818%5D%2C%22type%22:%22point%22%2C%22id%22:%22%22fb16a3a275dba63b2dd858d1550feb282ded06a8%22%2C%22tagIds%22:%22%5B%5D%7D%2C%7B%22point%22:%22%5B77865%2C62897%2C808%5D%2C%22type%22:%22point%22%2C%22id%22:%2225b502230519de81411cff1883fc71d81d9db5376%22%2C%22tagIds%22:%22%5B%5D%7D%2C%7B%22point%22:%22%5B77817%2C63030%2C798%5D%2C%22type%22:%22point%22%2C%22id%22:%22%22b27ce9157bcd2e836109bcd03d039c4b253c06f8%22%2C%22tagIds%22:%22%5B%5D%7D%2C%7B%22point%22:%22%5B77870%2C63070%2C789%5D%2C%22type%22:%22point%22%2C%22id%22:%22%229191d2f323f32658a399f2fdd2934f7d772d2e74%22%2C%22tagIds%22:%22%5B%5D%7D%2C%7B%22point%22:%22%5B77889%2C63188%2C778%5D%2C%22type%22:%22point%22%2C%22id%22:%22%2271db258004b4ed2fcf3d2ecdf0a9ac3c648bbdb3%22%2C%22tagIds%22:%22%5B%5D%7D%2C%7B%22point%22:%22%5B77911%2C63271%2C768%5D%2C%22type%22:%22point%22%2C%22id%22:%22%22b5477876acbc091fa118c4ce5fb199bde2753b6e%22%2C%22tagIds%22:%22%5B%5D%7D%2C%7B%22point%22:%22%5B77981%2C63320%2C758%5D%2C%22type%22:%22point%22%2C%22id%22:%22%22dd10275e23b38811c0f8523cf9702f147ede64dd%22%2C%22tagIds%22:%22%5B%5D%7D%2C%7B%22point%22:%22%5B77962%2C63439%2C749%5D%2C%22type%22:%22point%22%2C%22id%22:%22%22718ddc63480a00ae8d08743bf6349c0845bee7e9%22%2C%22tagIds%22:%22%5B%5D%7D%2C%7B%22point%22:%22%5B77997%2C63551%2C740%5D%2C%22type%22:%22point%22%2C%22id%22:%22%220364c21bdfae83e4c34a90dbf9200e24fd85c3b%22%2C%22tagIds%22:%22%5B%5D%7D%2C%7B%22point%22:%22%5B78035%2C63595%2C731%5D%2C%22type%22:%22point%22%2C%22id%22:%22%22110ad810196e45ede4f6fbb16ec6cf40baa783d8%22%2C%22tagIds%22:%22%5B%5D%7D%2C%7B%22point%22:%22%5B78040%2C63716%2C722%5D%2C%22type%22:%22point%22%2C%22id%22:%22%22ebd1a7dc14868be7a8333e6f257a89fdba266fff%22%2C%22tagIds%22:%22%5B%5D%7D%2C%7B%22point%22:%22%5B78018%2C63861%2C712%5D%2C%22type%22:%22point%22%2C%22id%22:%22%22e9dfdcf22b16ca5000572e60d95525381a22c110%22%2C%22tagIds%22:%22%5B%5D%7D%2C%7B%22point%22:%22%5B78087%2C63916%2C703%5D%2C%22type%22:%22point%22%2C%22id%22:%22%22ead54f4e824c286a8e66174f7407e563a17d57d5%22%2C%22tagIds%22:%22%5B%5D%7D%2C%7B%22point%22:%22%5B78094%2C64047%2C692%5D%2C%22type%22:%22point%22%2C%22id%22:%22%2209da60b56faac86644057045936b128c4f4dff0b%22%2C%22tagIds%22:%22%5B%5D%7D%2C%7B%22point%22:%22%5B78142%2C64133%2C683%5D%2C%22type%22:%22point%22%2C%22id%22:%22%2299cbbcd6ee29d0dfb9e8c76699ab886b59300731%22%2C%22tagIds%22:%22%5B%5D%7D%2C%7B%22point%22:%22%5B78182%2C64191%2C673%5D%2C%22type%22:%22point%22%2C%22id%22:%22%22daa0d734b44d7e33af11f7b6602f06c8c09d2014%22%2C%22tagIds%22:%22%5B%5D%7D%2C%7B%22point%22:%22%5B77836%2C64337%2C673%5D%2C%22type%22:%22point%22%2C%22id%22:%22%22f062c074f4a5233f180307c87090b044b5b07634%22%2C%22tagIds%22:%22%5B%5D%7D%2C%7B%22point%22:%22%5B78239%2C64217%2C664%5D%2C%22type%22:%22point%22%2C%22id%22:%22%221ec61775b1801a5d2139d3ac09837085a9ea0d1d%22%2C%22tagIds%22:%22%5B%5D%7D%2C%7B%22point%22:%22%5B77871%2C64381%2C664%5D%2C%22type%22:%22point%22%2C%22id%22:%22%22d015e7368192eb90c60ed5f90227a8a99e1a103f%22%2C%22tagIds%22:%22%5B%5D%7D%2C%7B%22point%22:%22%5B77902%2C62365%2C863%5D%2C%22type%22:%22point%22%2C%22id%22:%22%229eca69ed37dfd1b7380b8e799cc8fff6956341b0%22%2C%22tagIds%22:%22%5B%5D%7D%2C%7B%22point%22:%22%5B77884%2C62263%2C869%5D%2C%22type%22:%22point%22%2C%22id%22:%22%22f016e72241b2eccc89c05fa80f6d88dacec47ca3%22%2C%22tagIds%22:%22%5B%5D%7D%2C%7B%22point%22:%22%5B77840%2C62081%2C882%5D%2C%22type%22:%22point%22%2C%22id%22:%22%22369d47d3bb53fc04fdf2d29f3c4789cb363bfb26%22%2C%22tagIds%22:%22%5B%5D%7D%2C%7B%

22point%22:%5B77858%2C62001%2C893%5D%2C%22type%22:%22point%22%2C%22id%22:%22e77c30f581c28024ac9797bc617c204edef348b2%22%2C%22tagIds%22:%5B%5D%7D%2C%7B%22point%22:%5B77855%2C61982%2C905%5D%2C%22type%22:%22point%22%2C%22id%22:%22e00ab46aafd6594da0f4935b0da33abaec50bc2a%22%2C%22tagIds%22:%5B%5D%7D%2C%7B%22point%22:%5B77858%2C61888%2C916%5D%2C%22type%22:%22point%22%2C%22id%22:%228ba3529621559524c79518a3eb33e3c06c5685d2%22%2C%22tagIds%22:%5B%5D%7D%2C%7B%22point%22:%5B77855%2C61818%2C926%5D%2C%22type%22:%22point%22%2C%22id%22:%2285e1e753ba673b7e7cd8130546fe3ebee37e11b7%22%2C%22tagIds%22:%5B%5D%7D%2C%7B%22point%22:%5B77869%2C61774%2C940%5D%2C%22type%22:%22point%22%2C%22id%22:%221eefa2182591da702fddfcd86454710ec9b5b956%22%2C%22tagIds%22:%5B%5D%7D%2C%7B%22point%22:%5B77872%2C61770%2C951%5D%2C%22type%22:%22point%22%2C%22id%22:%22f3ad3539f5e3fc285a64e1ac787f02b36507b515%22%2C%22tagIds%22:%5B%5D%7D%2C%7B%22point%22:%5B77880%2C61726%2C961%5D%2C%22type%22:%22point%22%2C%22id%22:%2229e582605884713667ed2415ca8e03e195e5622a%22%2C%22tagIds%22:%5B%5D%7D%2C%7B%22point%22:%5B77905%2C61701%2C971%5D%2C%22type%22:%22point%22%2C%22id%22:%22a8fb596220b11171b121b47ad3ee9531533fa360%22%2C%22tagIds%22:%5B%5D%7D%2C%7B%22point%22:%5B77942%2C61704%2C982%5D%2C%22type%22:%22point%22%2C%22id%22:%2234a95e522aef2c351e6ad0ae953358557d615fca%22%2C%22tagIds%22:%5B%5D%7D%2C%7B%22point%22:%5B77956%2C61645%2C993%5D%2C%22type%22:%22point%22%2C%22id%22:%229685d30f5916a378b50e582cb1d231520f77400c%22%2C%22tagIds%22:%5B%5D%7D%2C%7B%22point%22:%5B77974%2C61649%2C1003%5D%2C%22type%22:%22point%22%2C%22id%22:%22e0045732cfbf9a030bbdc3b3e383f5b929105750%22%2C%22tagIds%22:%5B%5D%7D%2C%7B%22point%22:%5B77686%2C61154%2C1003%5D%2C%22type%22:%22point%22%2C%22id%22:%22e070a08e24d9a94dc6f07c910e73d0bc2526142f%22%2C%22tagIds%22:%5B%5D%7D%2C%7B%22point%22:%5B77977%2C61689%2C1013%5D%2C%22type%22:%22point%22%2C%22id%22:%221bb9355d36498dc0f8125402afe96c0b9f88aeb7%22%2C%22tagIds%22:%5B%5D%7D%2C%7B%22point%22:%5B77697%2C61150%2C1013%5D%2C%22type%22:%22point%22%2C%22id%22:%223a0db377c51ea3be095be2dfdda0f5e0178efdbd%22%2C%22tagIds%22:%5B%5D%7D%2C%7B%22point%22:%5B77690%2C61186%2C992%5D%2C%22type%22:%22point%22%2C%22id%22:%2240456f25e5e8a683325237c40883d786722c68cf%22%2C%22tagIds%22:%5B%5D%7D%2C%7B%22point%22:%5B77737%2C61255%2C985%5D%2C%22type%22:%22point%22%2C%22id%22:%2214c7bb029e607921501a4b756a7e32e08f15cdcb%22%2C%22tagIds%22:%5B%5D%7D%2C%7B%22point%22:%5B77879%2C61435%2C983%5D%2C%22type%22:%22point%22%2C%22id%22:%22461174700497b2d0c9d4ce179cb2f37f821f690a%22%2C%22tagIds%22:%5B%5D%7D%2C%7B%22point%22:%5B77751%2C61133%2C1022%5D%2C%22type%22:%22point%22%2C%22id%22:%22db73f7747e5142caa260cea40a30ce398e6ae438%22%2C%22tagIds%22:%5B%5D%7D%2C%7B%22point%22:%5B77999%2C61704%2C1022%5D%2C%22type%22:%22point%22%2C%22id%22:%225d46bdb5511d88165c0bc0a7af99a7dec35fab88%22%2C%22tagIds%22:%5B%5D%7D%2C%7B%22point%22:%5B77719%2C61020%2C1040%5D%2C%22type%22:%22point%22%2C%22id%22:%220c5be67174f0b7432e6782af76654f03aada50a6%22%2C%22tagIds%22:%5B%5D%7D%2C%7B%22point%22:%5B77923%2C61875%2C1040%5D%2C%22type%22:%22point%22%2C%22id%22:%22b605cdb9d1ce748cd433b2c259d5d58775454f8%22%2C%22tagIds%22:%5B%5D%7D%2C%7B%22point%22:%5B77832%2C61896%2C1050%5D%2C%22type%22:%22point%22%2C%22id%22:%2268abb1f623747212c161ad95a7ba886a738d62f7%22%2C%22tagIds%22:%5B%5D%7D%2C%7B%22point%22:%5B77620%2C60945%2C1050%5D%2C%22type%22:%22point%22%2C%22id%22:%22c94a8e55016a3f5959871f54ace14d1b926d58b4%22%2C%22tagIds%22:%5B%5D%7D%2C%7B%22point%22:%5B77700%2C60880%2C1061%5D%2C%22type%22:%22point%22%2C%22id%22:%22dffebc

6a68527f7db9ecef4fe696d068775dc184%22%2C%22tagIds%22:%5B%5D%7D%2C%7B%22point%22:%5B77311%2C61961%2C1061%5D%2C%22type%22:%22point%22%2C%22id%22:%2223ea890f7b6487bbd3c789660c9cc93505ad280a%22%2C%22tagIds%22:%5B%5D%7D%2C%7B%22point%22:%5B77708%2C60821%2C1072%5D%2C%22type%22:%22point%22%2C%22id%22:%2226d4126a4e1fe4660f3117cbf11705fe5aaa5cde%22%2C%22tagIds%22:%5B%5D%7D%2C%7B%22point%22:%5B77220%2C61921%2C1072%5D%2C%22type%22:%22point%22%2C%22id%22:%223001fb10bc7e98657ca2a3199db20a80edb6c110%22%2C%22tagIds%22:%5B%5D%7D%2C%7B%22point%22:%5B77591%2C60752%2C1085%5D%2C%22type%22:%22point%22%2C%22id%22:%22653134f2b6a5fdaa0b74fb58c22e0261b33e8e0b%22%2C%22tagIds%22:%5B%5D%7D%2C%7B%22point%22:%5B77147%2C61866%2C1085%5D%2C%22type%22:%22point%22%2C%22id%22:%22572eba935928489db41b959f2202b29a392811e4%22%2C%22tagIds%22:%5B%5D%7D%2C%7B%22point%22:%5B77548%2C60738%2C1095%5D%2C%22type%22:%22point%22%2C%22id%22:%223821f7b77f0d0a27e0a21222a58546e5abc4a90e%22%2C%22tagIds%22:%5B%5D%7D%2C%7B%22point%22:%5B77132%2C61808%2C1095%5D%2C%22type%22:%22point%22%2C%22id%22:%22200cd6ba9a9dc6cd33e28665a9657e1c99ebe81f6%22%2C%22tagIds%22:%5B%5D%7D%2C%7B%22point%22:%5B79231%2C64064%2C633%5D%2C%22type%22:%22point%22%2C%22id%22:%22bbdd780bf68e244e88320d293dfcd055d5836a9f%22%2C%22tagIds%22:%5B%5D%7D%2C%7B%22point%22:%5B78576%2C64348%2C633%5D%2C%22type%22:%22point%22%2C%22id%22:%220afa68f0fe7d1b401eaa79f3242e4fb3ad744330%22%2C%22tagIds%22:%5B%5D%7D%2C%7B%22point%22:%5B78062%2C64362%2C633%5D%2C%22type%22:%22point%22%2C%22id%22:%22b3beaa47c8faad130494a9e2c98693bbaf09a161%22%2C%22tagIds%22:%5B%5D%7D%2C%7B%22point%22:%5B79129%2C64089%2C639%5D%2C%22type%22:%22point%22%2C%22id%22:%22cffd15c05f6c131d6adf0c723dfc44d691063235%22%2C%22tagIds%22:%5B%5D%7D%2C%7B%22point%22:%5B78142%2C64351%2C639%5D%2C%22type%22:%22point%22%2C%22id%22:%227584921ac2ab95ff50e1fff0560b86e0acc58b86%22%2C%22tagIds%22:%5B%5D%7D%2C%7B%22point%22:%5B79368%2C64050%2C622%5D%2C%22type%22:%22point%22%2C%22id%22:%22588476ee33ec13e7dd40a5ba54c863f6251f1dd4%22%2C%22tagIds%22:%5B%5D%7D%2C%7B%22point%22:%5B78125%2C64420%2C613%5D%2C%22type%22:%22point%22%2C%22id%22:%22f4c2be66fb8829255fb2480b5313caaf6f606aec%22%2C%22tagIds%22:%5B%5D%7D%2C%7B%22point%22:%5B79673%2C64612%2C613%5D%2C%22type%22:%22point%22%2C%22id%22:%22dfe87cff5a08dea3d486ab93f12275429e1bb23e%22%2C%22tagIds%22:%5B%5D%7D%2C%7B%22point%22:%5B79428%2C64084%2C613%5D%2C%22type%22:%22point%22%2C%22id%22:%22ffc2628b208c03bae60f4634147069edf6df20f8%22%2C%22tagIds%22:%5B%5D%7D%2C%7B%22point%22:%5B79548%2C64111%2C607%5D%2C%22type%22:%22point%22%2C%22id%22:%22a1aaf23f69fb362bac91ae94f1af219a9e22320f%22%2C%22tagIds%22:%5B%5D%7D%2C%7B%22point%22:%5B79850%2C64678%2C607%5D%2C%22type%22:%22point%22%2C%22id%22:%2224af73bb310cbe9f0503ee5a6fac5b161d632eb4%22%2C%22tagIds%22:%5B%5D%7D%2C%7B%22point%22:%5B78117%2C64428%2C607%5D%2C%22type%22:%22point%22%2C%22id%22:%22b30e4a4c22089632aeea56857760e9a1f60b338b%22%2C%22tagIds%22:%5B%5D%7D%2C%7B%22point%22:%5B78101%2C64411%2C600%5D%2C%22type%22:%22point%22%2C%22id%22:%22e1dadfa893e9aa0c6ce04aec8e26cdd8cc956cfd%22%2C%22tagIds%22:%5B%5D%7D%2C%7B%22point%22:%5B80016%2C64694%2C600%5D%2C%22type%22:%22point%22%2C%22id%22:%2284acdd60dcfd6632f643b4b92b4de153dc898958%22%2C%22tagIds%22:%5B%5D%7D%2C%7B%22point%22:%5B79556%2C64094%2C600%5D%2C%22type%22:%22point%22%2C%22id%22:%22d305b835fd0636f9fb6d9519f65dff0fd6c51911%22%2C%22tagIds%22:%5B%5D%7D%2C%7B%22point%22:%5B79575%2C64061%2C591%5D%2C%22type%22:%22point%22%2C%22id%22:%22f7d6099b462354471036448dcc324b6a009f2cf5%22%2C%22tagIds%22:%5B%5D%7D%2C%7B%22point%22:%5B80127%2C64695%2C59

3%5D%2C%22type%22:%22point%22%2C%22id%22:%2206c5b8d85fc3f2da1e5a378a9bcfd3b5af770d06  
%22%2C%22tagIds%22:%5B%5D%7D%2C%7B%22point%22:%5B79588%2C64051%2C584%5D%2C%22ty  
pe%22:%22point%22%2C%22id%22:%22395010d5f1af7096341185a0c4ec36593ef66212%22%2C%22tag  
lds%22:%5B%5D%7D%2C%7B%22point%22:%5B80284%2C64771%2C584%5D%2C%22type%22:%22poi  
nt%22%2C%22id%22:%224cb4705159cf8fc5d9985fa6fa26bcb1f87ef910%22%2C%22tagIds%22:%5B%5D  
%7D%2C%7B%22point%22:%5B79587%2C64058%2C578%5D%2C%22type%22:%22point%22%2C%22id  
%22:%2224625feb261873c2db0ee92c43f9b3169c9cca4%22%2C%22tagIds%22:%5B%5D%7D%2C%7B%  
22point%22:%5B80437%2C64840%2C576%5D%2C%22type%22:%22point%22%2C%22id%22:%22a7ce8  
53b0972bb7cb7b69f89ae3ea913de0e02b6%22%2C%22tagIds%22:%5B%5D%7D%2C%7B%22point%22:  
%5B80542%2C64874%2C570%5D%2C%22type%22:%22point%22%2C%22id%22:%229a912372abdf188  
a8bfec01975552d7da49218%22%2C%22tagIds%22:%5B%5D%7D%2C%7B%22point%22:%5B79620%2C  
64091%2C573%5D%2C%22type%22:%22point%22%2C%22id%22:%22b811b096dec24c529ddf75146c07  
e75ceaec603b%22%2C%22tagIds%22:%5B%5D%7D%2C%7B%22point%22:%5B80644%2C64925%2C564  
%5D%2C%22type%22:%22point%22%2C%22id%22:%220674d73e3db279e9ec3ba4f4340332d9561260af  
%22%2C%22tagIds%22:%5B%5D%7D%2C%7B%22point%22:%5B79732%2C64176%2C564%5D%2C%22ty  
pe%22:%22point%22%2C%22id%22:%2211a33cce0b2098926a680b1b779ecd4e26a7fefe%22%2C%22ta  
glds%22:%5B%5D%7D%2C%7B%22point%22:%5B79823%2C64228%2C553%5D%2C%22type%22:%22poi  
nt%22%2C%22id%22:%226a9a407e5fa220de0c4b27111eff3020a0c93c57%22%2C%22tagIds%22:%5B%5  
D%7D%2C%7B%22point%22:%5B80754%2C64973%2C556%5D%2C%22type%22:%22point%22%2C%22i  
d%22:%221655b0066a5236f3065f9ec8e23d1170fde0ba52%22%2C%22tagIds%22:%5B%5D%7D%2C%7B  
%22point%22:%5B80864%2C65021%2C550%5D%2C%22type%22:%22point%22%2C%22id%22:%2218ab  
f9cfbbd6973faaa5578255fbecbc9d3e3e2d%22%2C%22tagIds%22:%5B%5D%7D%2C%7B%22point%22:%  
5B79861%2C64276%2C550%5D%2C%22type%22:%22point%22%2C%22id%22:%229fca0b6a17582fe96  
7cc32dbaf3beeda968995d%22%2C%22tagIds%22:%5B%5D%7D%2C%7B%22point%22:%5B80957%2C65  
057%2C541%5D%2C%22type%22:%22point%22%2C%22id%22:%221e08a2cbbbffe656a2695f49c924bc0  
5e55be758%22%2C%22tagIds%22:%5B%5D%7D%2C%7B%22point%22:%5B79863%2C64294%2C541%5  
D%2C%22type%22:%22point%22%2C%22id%22:%22b96f2d3572aff74d594ccc5c28594b83dce97686%22  
%2C%22tagIds%22:%5B%5D%7D%2C%7B%22point%22:%5B81093%2C65125%2C530%5D%2C%22type%  
22:%22point%22%2C%22id%22:%229e6efd4182e9c5411a72790df8ca3b03858d59c%22%2C%22tagIds  
%22:%5B%5D%7D%2C%7B%22point%22:%5B79845%2C64343%2C530%5D%2C%22type%22:%22point%  
22%2C%22id%22:%22cf830e80520cb1e16a0aa9f0cfddb9d5f8ee5dd8%22%2C%22tagIds%22:%5B%5D%  
7D%2C%7B%22point%22:%5B81222%2C65192%2C519%5D%2C%22type%22:%22point%22%2C%22id%  
22:%224b7a42fc91e05a3f12c24841d6963db6cc5a896a%22%2C%22tagIds%22:%5B%5D%7D%2C%7B%2  
2point%22:%5B79863%2C64433%2C519%5D%2C%22type%22:%22point%22%2C%22id%22:%22471f6e4  
a4f7df1bd038724f07cfaa17a377f4acc%22%2C%22tagIds%22:%5B%5D%7D%2C%7B%22point%22:%5B7  
9862%2C64509%2C509%5D%2C%22type%22:%22point%22%2C%22id%22:%22db643b1c41ce80f4182d  
e64410b83dbb573c6e68%22%2C%22tagIds%22:%5B%5D%7D%2C%7B%22point%22:%5B81571%2C653  
94%2C507%5D%2C%22type%22:%22point%22%2C%22id%22:%2201f9bd6f035804a8d28029419da85b5  
6990394d%22%2C%22tagIds%22:%5B%5D%7D%2C%7B%22point%22:%5B81655%2C65458%2C498%5  
D%2C%22type%22:%22point%22%2C%22id%22:%22e5c2da3436a5d84c5fe513293447559fda5605c9%2  
2%2C%22tagIds%22:%5B%5D%7D%2C%7B%22point%22:%5B81832%2C65515%2C491%5D%2C%22type  
%22:%22point%22%2C%22id%22:%2213e17558e15dc6cbeaa45c814d6ab08d7d5558a%22%2C%22tagl  
ds%22:%5B%5D%7D%2C%7B%22point%22:%5B82065%2C65626%2C485%5D%2C%22type%22:%22poin  
t%22%2C%22id%22:%22427830145d808f4cf6471fb28e60c0dda945308d%22%2C%22tagIds%22:%5B%5

D%7D%2C%7B%22point%22:%5B82545%2C65729%2C465%5D%2C%22type%22:%22point%22%2C%22id%22:%221551d266e2ebed1e96ff6ed77f85b4b9d8a45d09%22%2C%22tagIds%22:%5B%5D%7D%2C%7B%22point%22:%5B82698%2C65748%2C459%5D%2C%22type%22:%22point%22%2C%22id%22:%22daaac146076ef0b9bd2c3a02960d5f09859478d0%22%2C%22tagIds%22:%5B%5D%7D%2C%7B%22point%22:%5B82729%2C65729%2C455%5D%2C%22type%22:%22point%22%2C%22id%22:%22f71d5e126743ec0465aaeff1740e83742e21fedb%22%2C%22tagIds%22:%5B%5D%7D%2C%7B%22point%22:%5B82798%2C65740%2C450%5D%2C%22type%22:%22point%22%2C%22id%22:%224d59666fd7a4ae1c0af893fcea6b068ec2f140e8%22%2C%22tagIds%22:%5B%5D%7D%2C%7B%22point%22:%5B82962%2C65770%2C438%5D%2C%22type%22:%22point%22%2C%22id%22:%229a7b6cbad9998a8ea07e80b605fd4556d1567fd8%22%2C%22tagIds%22:%5B%5D%7D%2C%7B%22point%22:%5B83059%2C65800%2C434%5D%2C%22type%22:%22point%22%2C%22id%22:%22195c568d308c31ca4d436f2392203923fae1c3a2%22%2C%22tagIds%22:%5B%5D%7D%2C%7B%22point%22:%5B83142%2C65793%2C430%5D%2C%22type%22:%22point%22%2C%22id%22:%2227fded8e2a903001999c6ef5b593a64651ebe568%22%2C%22tagIds%22:%5B%5D%7D%2C%7B%22point%22:%5B84134%2C66020%2C430%5D%2C%22type%22:%22point%22%2C%22id%22:%22e706b249f296107f5aa30e120a2b43fc5b067c46%22%2C%22tagIds%22:%5B%5D%7D%2C%7B%22point%22:%5B83506%2C66503%2C430%5D%2C%22type%22:%22point%22%2C%22id%22:%22dbd4950567bfa586312cfd9e57d9cf3c2acf%22%2C%22tagIds%22:%5B%5D%7D%2C%7B%22point%22:%5B83617%2C65818%2C425%5D%2C%22type%22:%22point%22%2C%22id%22:%2226cdee70a4e0d7e1fb46030e189f5391d2df48e8f%22%2C%22tagIds%22:%5B%5D%7D%2C%7B%22point%22:%5B83315%2C66506%2C425%5D%2C%22type%22:%22point%22%2C%22id%22:%22c9013aacc8a5629e4cd7b4a9be2adab68335813d%22%2C%22tagIds%22:%5B%5D%7D%2C%7B%22point%22:%5B84177%2C65974%2C425%5D%2C%22type%22:%22point%22%2C%22id%22:%226d54a3a70b421850d5a831edae2f80582847806d%22%2C%22tagIds%22:%5B%5D%7D%2C%7B%22point%22:%5B81145%2C65957%2C425%5D%2C%22type%22:%22point%22%2C%22id%22:%2242a3b7357a18b3d662f4374e87c8094dfdab0a95%22%2C%22tagIds%22:%5B%5D%7D%2C%7B%22point%22:%5B80983%2C65764%2C432%5D%2C%22type%22:%22point%22%2C%22id%22:%2258238bff56cfe6c2f662d54bc2704827ecb0e506%22%2C%22tagIds%22:%5B%5D%7D%2C%7B%22point%22:%5B80886%2C65746%2C438%5D%2C%22type%22:%22point%22%2C%22id%22:%22a40fb55d0cd7634d6f7f54cdb49955d8d4bd1ace%22%2C%22tagIds%22:%5B%5D%7D%2C%7B%22point%22:%5B80801%2C65494%2C444%5D%2C%22type%22:%22point%22%2C%22id%22:%222481025f4131ab426cb40ecafa0d8c8699a94d7b%22%2C%22tagIds%22:%5B%5D%7D%2C%7B%22point%22:%5B80653%2C65300%2C455%5D%2C%22type%22:%22point%22%2C%22id%22:%2241052b02ed61e673b6ad0b003cccad0458e72cfe%22%2C%22tagIds%22:%5B%5D%7D%2C%7B%22point%22:%5B80528%2C65209%2C463%5D%2C%22type%22:%22point%22%2C%22id%22:%22e47781126c4ed878979772188d9fb921014a4983%22%2C%22tagIds%22:%5B%5D%7D%2C%7B%22point%22:%5B80394%2C65149%2C470%5D%2C%22type%22:%22point%22%2C%22id%22:%22d8e07081a28d40bc3136a57394a8cf92a767530f%22%2C%22tagIds%22:%5B%5D%7D%2C%7B%22point%22:%5B80320%2C65073%2C475%5D%2C%22type%22:%22point%22%2C%22id%22:%22d991b07f5edb9b89f0f29292d19c361f474df6b8%22%2C%22tagIds%22:%5B%5D%7D%2C%7B%22point%22:%5B80221%2C64990%2C481%5D%2C%22type%22:%22point%22%2C%22id%22:%22fc11c26cac643d2746fd2005641fac288fab9e07%22%2C%22tagIds%22:%5B%5D%7D%2C%7B%22point%22:%5B80067%2C64849%2C489%5D%2C%22type%22:%22point%22%2C%22id%22:%227c93d0bd125a4704a015a8b57ff16ad051768cb9%22%2C%22tagIds%22:%5B%5D%7D%2C%7B%22point%22:%5B79938%2C64720%2C495%5D%2C%22type%22:%22point%22%2C%22id%22:%224ddd830c9b57543581d8c4f9e7b1e579a507b78%22%2C%22tagIds%22:%5B%5D%7D%2C%7B%22point%22:%5B79884%2C64646%2C500%5D%2C%22type%22:%22point%22%2C%22id%22:%2206affbb85

a336f5ea2c99f91f73a2126d9f87d89%22%2C%22tagIds%22:%5B%5D%7D%2C%7B%22point%22:%5B81377%2C66094%2C415%5D%2C%22type%22:%22point%22%2C%22id%22:%2201592fae6a7c54f4e251be3e85692e6fce66fa14%22%2C%22tagIds%22:%5B%5D%7D%2C%7B%22point%22:%5B83622%2C65751%2C414%5D%2C%22type%22:%22point%22%2C%22id%22:%22e50ac3419a60361eef1827280525042321bc7cfc%22%2C%22tagIds%22:%5B%5D%7D%2C%7B%22point%22:%5B84259%2C65861%2C414%5D%2C%22type%22:%22point%22%2C%22id%22:%22bf0464756a5eb68a9b272f89f2ebdccccdaf102c%22%2C%22tagIds%22:%5B%5D%7D%2C%7B%22point%22:%5B84290%2C65846%2C409%5D%2C%22type%22:%22point%22%2C%22id%22:%22c1771dbf5bc4959b16d65d47a0feda863144adf2%22%2C%22tagIds%22:%5B%5D%7D%2C%7B%22point%22:%5B83817%2C65764%2C409%5D%2C%22type%22:%22point%22%2C%22id%22:%224259bf382795b9ea38276ae60845830204ec2f23%22%2C%22tagIds%22:%5B%5D%7D%2C%7B%22point%22:%5B81473%2C66152%2C410%5D%2C%22type%22:%22point%22%2C%22id%22:%22a66b46f8a498dc4d41a82a0170d75aacca74de95%22%2C%22tagIds%22:%5B%5D%7D%2C%7B%22point%22:%5B82006%2C66418%2C410%5D%2C%22type%22:%22point%22%2C%22id%22:%226149fe7ce6e395ac28f6d71b100a8e2f01511a5c%22%2C%22tagIds%22:%5B%5D%7D%2C%7B%22point%22:%5B84319%2C65812%2C404%5D%2C%22type%22:%22point%22%2C%22id%22:%2214141dbd7c8abc1a2b3ded8aead27b5a3e79586c%22%2C%22tagIds%22:%5B%5D%7D%2C%7B%22point%22:%5B83916%2C65745%2C404%5D%2C%22type%22:%22point%22%2C%22id%22:%229595ffb11739a95e17dbbbc273802dbe79a0a938%22%2C%22tagIds%22:%5B%5D%7D%2C%7B%22point%22:%5B83995%2C65735%2C399%5D%2C%22type%22:%22point%22%2C%22id%22:%2248059fbc5adc212a3d83251bd49bac162d00cfda%22%2C%22tagIds%22:%5B%5D%7D%2C%7B%22point%22:%5B84362%2C65799%2C399%5D%2C%22type%22:%22point%22%2C%22id%22:%2263671a9eecd7fc1d51a69f1d2abeed51eaddecf%22%2C%22tagIds%22:%5B%5D%7D%2C%7B%22point%22:%5B84112%2C65724%2C394%5D%2C%22type%22:%22point%22%2C%22id%22:%22da4826f169526088f2e34fce91e89bc56f25d757%22%2C%22tagIds%22:%5B%5D%7D%2C%7B%22point%22:%5B84354%2C65780%2C394%5D%2C%22type%22:%22point%22%2C%22id%22:%22d27c3d0dadac614bd8e76eda8badd38f0ef43151%22%2C%22tagIds%22:%5B%5D%7D%2C%7B%22point%22:%5B84159%2C65720%2C389%5D%2C%22type%22:%22point%22%2C%22id%22:%22768bed3ed6b564b032dfbc5f9c668f36756f466c%22%2C%22tagIds%22:%5B%5D%7D%2C%7B%22point%22:%5B84306%2C65762%2C389%5D%2C%22type%22:%22point%22%2C%22id%22:%2263b7a31c195619febcb1b831f3e89ea880d7e8ce2%22%2C%22tagIds%22:%5B%5D%7D%2C%7B%22point%22:%5B82855%2C65743%2C445%5D%2C%22type%22:%22point%22%2C%22id%22:%22bb3dd3008c49a983d3cb6207bfe007431f9f23ab%22%2C%22tagIds%22:%5B%5D%7D%2C%7B%22point%22:%5B84320%2C65772%2C383%5D%2C%22type%22:%22point%22%2C%22id%22:%2228f731b89eca614e66794b9ec5d63657f80a61aaf%22%2C%22tagIds%22:%5B%5D%7D%2C%7B%22point%22:%5B89052%2C66529%2C64%5D%2C%22type%22:%22point%22%2C%22id%22:%226e9cc54745706126b2218d79a7b76281bb7c250a%22%2C%22tagIds%22:%5B%5D%7D%2C%7B%22point%22:%5B88984%2C66533%2C69%5D%2C%22type%22:%22point%22%2C%22id%22:%2268bb5d689d6c8db4f6e6462ac22f8d0953cc3da8%22%2C%22tagIds%22:%5B%5D%7D%2C%7B%22point%22:%5B88938%2C66539%2C74%5D%2C%22type%22:%22point%22%2C%22id%22:%22b7ee756c3021316dc471f594bb0707f5f462485d%22%2C%22tagIds%22:%5B%5D%7D%2C%7B%22point%22:%5B88852%2C66496%2C81%5D%2C%22type%22:%22point%22%2C%22id%22:%2226cede4530b42c622e9648fd04b8e99e70dd9a17%22%2C%22tagIds%22:%5B%5D%7D%2C%7B%22point%22:%5B88770%2C66524%2C90%5D%2C%22type%22:%22point%22%2C%22id%22:%2228525253018be79cb701d8d8f79a0322bdd904c5%22%2C%22tagIds%22:%5B%5D%7D%2C%7B%22point%22:%5B88646%2C66484%2C98%5D%2C%22type%22:%22point%22%2C%22id%22:%2219f1f82f6a25c52aa4b89fd72c4f86b60a552fd5%22%2C%22tagIds%22:%5B%5D%7D%2C%7B%22point%22:%5B88509%2C66500%2C109%5D%2C%2

2type%22:%22point%22%2C%22id%22:%22330c190451b6ed71c970d20e747ec8ccb9477da1%22%2C%22tagIds%22:%5B%5D%7D%2C%7B%22point%22:%5B88391%2C66514%2C119%5D%2C%22type%22:%22point%22%2C%22id%22:%22d7a588b03f425d9a93a008499d7c50ed31c1e486%22%2C%22tagIds%22:%5B%5D%7D%2C%7B%22point%22:%5B88246%2C66493%2C126%5D%2C%22type%22:%22point%22%2C%22id%22:%220af48827a24852c6f4d8db70b3518ac9ddc8eda9%22%2C%22tagIds%22:%5B%5D%7D%2C%7B%22point%22:%5B88100%2C66516%2C137%5D%2C%22type%22:%22point%22%2C%22id%22:%22b89346182d3617725462e372e2bb54da3f7f4ea9%22%2C%22tagIds%22:%5B%5D%7D%2C%7B%22point%22:%5B87825%2C66423%2C145%5D%2C%22type%22:%22point%22%2C%22id%22:%2207b7500d7e55084fe5e922fd81d1b8853c2764c7%22%2C%22tagIds%22:%5B%5D%7D%2C%7B%22point%22:%5B87359%2C66342%2C154%5D%2C%22type%22:%22point%22%2C%22id%22:%22ba37f2de02d6af32fc38848dd2bb62aa26066330%22%2C%22tagIds%22:%5B%5D%7D%2C%7B%22point%22:%5B87262%2C66350%2C162%5D%2C%22type%22:%22point%22%2C%22id%22:%22426664943add2e104d05553478c8781c0502ca38%22%2C%22tagIds%22:%5B%5D%7D%2C%7B%22point%22:%5B86949%2C66345%2C171%5D%2C%22type%22:%22point%22%2C%22id%22:%22d2aa95c62be22d9cc020688411bbf3551cba098a%22%2C%22tagIds%22:%5B%5D%7D%2C%7B%22point%22:%5B86701%2C66332%2C181%5D%2C%22type%22:%22point%22%2C%22id%22:%2226e07f345ecce3372f8f71967874f7b41b6e2ecea%22%2C%22tagIds%22:%5B%5D%7D%2C%7B%22point%22:%5B86435%2C66336%2C191%5D%2C%22type%22:%22point%22%2C%22id%22:%220584adf128784b96e44e529b66b5aac14e9d5d14%22%2C%22tagIds%22:%5B%5D%7D%2C%7B%22point%22:%5B86376%2C66323%2C201%5D%2C%22type%22:%22point%22%2C%22id%22:%22d87b6553b3ea51a23e1e71abafec726df55b136f%22%2C%22tagIds%22:%5B%5D%7D%2C%7B%22point%22:%5B86161%2C66314%2C212%5D%2C%22type%22:%22point%22%2C%22id%22:%2272571f5d1d56f56cd0899a12365cbc93635982c3%22%2C%22tagIds%22:%5B%5D%7D%2C%7B%22point%22:%5B86084%2C66297%2C220%5D%2C%22type%22:%22point%22%2C%22id%22:%22bd46c2bd5defc5d31568e085bcdad07b96269c9f%22%2C%22tagIds%22:%5B%5D%7D%2C%7B%22point%22:%5B86039%2C66258%2C234%5D%2C%22type%22:%22point%22%2C%22id%22:%2243517bc1b26d754e7799a09760c0cc93a2b4ae76%22%2C%22tagIds%22:%5B%5D%7D%2C%7B%22point%22:%5B85836%2C66248%2C247%5D%2C%22type%22:%22point%22%2C%22id%22:%22ab216887d9822cb9caeeae1b1a7b4a96888fe007%22%2C%22tagIds%22:%5B%5D%7D%2C%7B%22point%22:%5B85764%2C66217%2C255%5D%2C%22type%22:%22point%22%2C%22id%22:%2290e63152d32d9ac63c22a54c6ce003d550b828cd%22%2C%22tagIds%22:%5B%5D%7D%2C%7B%22point%22:%5B85628%2C66151%2C265%5D%2C%22type%22:%22point%22%2C%22id%22:%221220516f71551786d51b3e502137043a4587ada8%22%2C%22tagIds%22:%5B%5D%7D%2C%7B%22point%22:%5B85555%2C66104%2C274%5D%2C%22type%22:%22point%22%2C%22id%22:%22d19f0834ace9a999eab21a050a1c605387f658ee%22%2C%22tagIds%22:%5B%5D%7D%2C%7B%22point%22:%5B85456%2C66029%2C285%5D%2C%22type%22:%22point%22%2C%22id%22:%22b0caf1bf0ad97ea96fb37aa9da66cddf47c8b603%22%2C%22tagIds%22:%5B%5D%7D%2C%7B%22point%22:%5B85367%2C65997%2C294%5D%2C%22type%22:%22point%22%2C%22id%22:%224cea373cf62291480032cc2003b911808a6412bf%22%2C%22tagIds%22:%5B%5D%7D%2C%7B%22point%22:%5B85258%2C65949%2C303%5D%2C%22type%22:%22point%22%2C%22id%22:%22a75a32f801c9caac00c437d190c8787451365eb0%22%2C%22tagIds%22:%5B%5D%7D%2C%7B%22point%22:%5B85109%2C65889%2C319%5D%2C%22type%22:%22point%22%2C%22id%22:%22f18c0db51faabd8740f85c3fecce28462023e3e9%22%2C%22tagIds%22:%5B%5D%7D%2C%7B%22point%22:%5B85056%2C65871%2C325%5D%2C%22type%22:%22point%22%2C%22id%22:%228be4cc35188b9d80f1ed38467e23d694fe578d67%22%2C%22tagIds%22:%5B%5D%7D%2C%7B%22point%22:%5B84921%2C65834%2C335%5D%2C%22type%22:%22point%22%2C%22id%22:%22546f61cf82ce90032badebed6381b9e6d3998fac%22%2C%22tagIds%22:%5B%5



d%22:%22b10bb9730099566246d086d260237e6e61c3b7c5%22%2C%22tagIds%22:%5B%5D%7D%2C%7B%22point%22:%5B84706%2C54456%2C1951%5D%2C%22type%22:%22point%22%2C%22id%22:%224a3095a3d253ee5452dd1fb3e5c8640e5f7f152b%22%2C%22tagIds%22:%5B%5D%7D%2C%7B%22point%22:%5B84622%2C54280%2C1947%5D%2C%22type%22:%22point%22%2C%22id%22:%2270bb7d102b2d36b4627b4d0d68a1fe078c4764a6%22%2C%22tagIds%22:%5B%5D%7D%2C%7B%22point%22:%5B84525%2C54243%2C1940%5D%2C%22type%22:%22point%22%2C%22id%22:%222f294e854a26c155459f44ea7f97a70f50cd2a06%22%2C%22tagIds%22:%5B%5D%7D%2C%7B%22point%22:%5B85344%2C56636%2C1863%5D%2C%22type%22:%22point%22%2C%22id%22:%223ee88b9f62afad7764c1fd514b65153e59e6a37a%22%2C%22tagIds%22:%5B%5D%7D%2C%7B%22point%22:%5B85489%2C57229%2C1873%5D%2C%22type%22:%22point%22%2C%22id%22:%224d47b8b34b362a149f5f07473d5d73aeebe1b11a%22%2C%22tagIds%22:%5B%5D%7D%2C%7B%22point%22:%5B83314%2C51646%2C1931%5D%2C%22type%22:%22point%22%2C%22id%22:%22374417ff9761575084944fcefee4d1319907d37d%22%2C%22tagIds%22:%5B%5D%7D%2C%7B%22point%22:%5B53418%2C63462%2C1342%5D%2C%22type%22:%22point%22%2C%22id%22:%22127c204396815676fe17338ba1a8773f9ad70d56%22%2C%22tagIds%22:%5B%5D%7D%2C%7B%22point%22:%5B53386%2C63358%2C1347%5D%2C%22type%22:%22point%22%2C%22id%22:%222c067080d0a402900397d4a980c29e95acb07b57%22%2C%22tagIds%22:%5B%5D%7D%2C%7B%22point%22:%5B52481%2C62131%2C1373%5D%2C%22type%22:%22point%22%2C%22id%22:%22e5a160f0a5262fc9c0a93674726b01a607b78aa8%22%2C%22tagIds%22:%5B%5D%7D%2C%7B%22point%22:%5B52436%2C62076%2C1378%5D%2C%22type%22:%22point%22%2C%22id%22:%22d64954a569b9931ea448303706a195c08efbc3cb%22%2C%22tagIds%22:%5B%5D%7D%2C%7B%22point%22:%5B52360%2C62023%2C1385%5D%2C%22type%22:%22point%22%2C%22id%22:%22517ac0993924af391825bb93850d6f50d7f1e642%22%2C%22tagIds%22:%5B%5D%7D%2C%7B%22point%22:%5B51525%2C61039%2C1411%5D%2C%22type%22:%22point%22%2C%22id%22:%22b9d7dcef6c33fb65a342b32ff965756fae484f9f%22%2C%22tagIds%22:%5B%5D%7D%2C%7B%22point%22:%5B51363%2C60786%2C1431%5D%2C%22type%22:%22point%22%2C%22id%22:%2204da526098865ffac47c38860c7deb65c503bc0b%22%2C%22tagIds%22:%5B%5D%7D%2C%7B%22point%22:%5B51238%2C60603%2C1439%5D%2C%22type%22:%22point%22%2C%22id%22:%22316d8e39d441d08946e5322b053a3667bfc115ea%22%2C%22tagIds%22:%5B%5D%7D%2C%7B%22point%22:%5B51102%2C60343%2C1453%5D%2C%22type%22:%22point%22%2C%22id%22:%22e460c2a93095194b620a1388eb8bf6133225d84f%22%2C%22tagIds%22:%5B%5D%7D%2C%7B%22point%22:%5B55842%2C66561%2C1103%5D%2C%22type%22:%22point%22%2C%22id%22:%22b7aee322ad901a9685662928cbe1ccaafb573be9%22%2C%22tagIds%22:%5B%5D%7D%2C%7B%22point%22:%5B54527%2C65852%2C1101%5D%2C%22type%22:%22point%22%2C%22id%22:%22e283ca4a97d04a37b2ddc8785c3b5265ceeeac76%22%2C%22tagIds%22:%5B%5D%7D%2C%7B%22point%22:%5B56670%2C67311%2C981%5D%2C%22type%22:%22point%22%2C%22id%22:%22d32a3760a31157d0810f3907c3fbfce51c849e2c%22%2C%22tagIds%22:%5B%5D%7D%2C%7B%22point%22:%5B57475%2C67936%2C889%5D%2C%22type%22:%22point%22%2C%22id%22:%221e2daaa90a57cee3041b6f01ff2c164d34ae9e68%22%2C%22tagIds%22:%5B%5D%7D%2C%7B%22point%22:%5B58487%2C68077%2C889%5D%2C%22type%22:%22point%22%2C%22id%22:%224d9c08c99de6cb3b7e0d5ae446bbf5c029e00e33%22%2C%22tagIds%22:%5B%5D%7D%2C%7B%22point%22:%5B57476%2C67919%2C884%5D%2C%22type%22:%22point%22%2C%22id%22:%22e591565a5a029e9f1d8fd0f12f30de82110a1157%22%2C%22tagIds%22:%5B%5D%7D%2C%7B%22point%22:%5B58623%2C68080%2C884%5D%2C%22type%22:%22point%22%2C%22id%22:%22810f7a8622ed16e8164efb024a11eda6f05c47c9%22%2C%22tagIds%22:%5B%5D%7D%2C%7B%22point%22:%5B57795%2C67986%2C871%5D%2C%22type%22:%22point%22%2C%22id%22:%2206e75ace33061d856bc7a40a1549c29dd044fbdd%22%2C%22tagIds%22:%5B%5D%7D%2C%7

B%22point%22:%5B55291%2C66296%2C1030%5D%2C%22type%22:%22point%22%2C%22id%22:%22907ad895b06b8bfb15c6a61680c4eab92ec8683f%22%2C%22tagIds%22:%5B%5D%7D%2C%7B%22point%22:%5B55352%2C66286%2C1023%5D%2C%22type%22:%22point%22%2C%22id%22:%22649505b657206b014d16900a0397225aac31360a%22%2C%22tagIds%22:%5B%5D%7D%2C%7B%22point%22:%5B55448%2C66418%2C1019%5D%2C%22type%22:%22point%22%2C%22id%22:%223420b7eac79280a801479a8215bc7cf4974a1805%22%2C%22tagIds%22:%5B%5D%7D%2C%7B%22point%22:%5B55535%2C66464%2C1010%5D%2C%22type%22:%22point%22%2C%22id%22:%224542f4737e3b7b9a3f985f280221f449974f1762%22%2C%22tagIds%22:%5B%5D%7D%2C%7B%22point%22:%5B56030%2C66958%2C1004%5D%2C%22type%22:%22point%22%2C%22id%22:%2227da30d7b67e8a111e4597ec711605bf5b79f775%22%2C%22tagIds%22:%5B%5D%7D%2C%7B%22point%22:%5B55812%2C66745%2C1005%5D%2C%22type%22:%22point%22%2C%22id%22:%222e5ca02be0a4177926227aaadd53fa2c567b8b6cc%22%2C%22tagIds%22:%5B%5D%7D%2C%7B%22point%22:%5B53421%2C64113%2C1180%5D%2C%22type%22:%22point%22%2C%22id%22:%22f288e4263da152eeced63fc9ccb917c3fa59811a%22%2C%22tagIds%22:%5B%5D%7D%2C%7B%22point%22:%5B53275%2C63933%2C1190%5D%2C%22type%22:%22point%22%2C%22id%22:%224ce4526391c6e0db50c0bc256702a1ec78d9beaa%22%2C%22tagIds%22:%5B%5D%7D%2C%7B%22point%22:%5B52892%2C63255%2C1221%5D%2C%22type%22:%22point%22%2C%22id%22:%220f89d169e5035b296875316d744847eb1e2a8d2b%22%2C%22tagIds%22:%5B%5D%7D%2C%7B%22point%22:%5B52892%2C63111%2C1228%5D%2C%22type%22:%22point%22%2C%22id%22:%22c34d20a82087c85b6272df56430face2e532330f%22%2C%22tagIds%22:%5B%5D%7D%2C%7B%22point%22:%5B52908%2C63049%2C1233%5D%2C%22type%22:%22point%22%2C%22id%22:%2246c29fd22c00391feb0618ba3216f080b9c2adb%22%2C%22tagIds%22:%5B%5D%7D%2C%7B%22point%22:%5B52924%2C63010%2C1238%5D%2C%22type%22:%22point%22%2C%22id%22:%22a7f37a023a22f2aaf0e68ed730159c82fe5a8c28%22%2C%22tagIds%22:%5B%5D%7D%2C%7B%22point%22:%5B52921%2C62980%2C1241%5D%2C%22type%22:%22point%22%2C%22id%22:%2250a7db7b7f01132ff254796169544af2d3a2a2ea%22%2C%22tagIds%22:%5B%5D%7D%2C%7B%22point%22:%5B52865%2C62893%2C1248%5D%2C%22type%22:%22point%22%2C%22id%22:%22a326eb512b08cf56acca1bb67ede9a3e2bc6bf3b%22%2C%22tagIds%22:%5B%5D%7D%2C%7B%22point%22:%5B52792%2C62735%2C1265%5D%2C%22type%22:%22point%22%2C%22id%22:%22e27fc55896cb735f74acf738bbde361e826dbc86%22%2C%22tagIds%22:%5B%5D%7D%2C%7B%22point%22:%5B52733%2C62636%2C1271%5D%2C%22type%22:%22point%22%2C%22id%22:%2216495808d7360578757112e6ec99d6815b6b9205%22%2C%22tagIds%22:%5B%5D%7D%2C%7B%22point%22:%5B52701%2C62598%2C1278%5D%2C%22type%22:%22point%22%2C%22id%22:%22dccc0b9cd46358f29938417251f0f0147c0db895%22%2C%22tagIds%22:%5B%5D%7D%2C%7B%22point%22:%5B52646%2C62516%2C1282%5D%2C%22type%22:%22point%22%2C%22id%22:%22c73ff3df0af7816dfb2050285b8efdf090106ddc%22%2C%22tagIds%22:%5B%5D%7D%2C%7B%22point%22:%5B52679%2C62462%2C1290%5D%2C%22type%22:%22point%22%2C%22id%22:%2276e1dcbef477595c34def13640eeef779aa06832%22%2C%22tagIds%22:%5B%5D%7D%2C%7B%22point%22:%5B52483%2C62164%2C1295%5D%2C%22type%22:%22point%22%2C%22id%22:%22a73152ace1ef001262f10866d8728e51a91006cb%22%2C%22tagIds%22:%5B%5D%7D%2C%7B%22point%22:%5B52488%2C62167%2C1300%5D%2C%22type%22:%22point%22%2C%22id%22:%226152438b8acefb4482bcf8b3f9421459357306d8%22%2C%22tagIds%22:%5B%5D%7D%2C%7B%22point%22:%5B52453%2C62095%2C1304%5D%2C%22type%22:%22point%22%2C%22id%22:%22a91913dac46286d291461945e0917e5adca1007e%22%2C%22tagIds%22:%5B%5D%7D%2C%7B%22point%22:%5B52406%2C61960%2C1309%5D%2C%22type%22:%22point%22%2C%22id%22:%22b7381f4f591a24ce8b43bcb668b74240c474bae8%22%2C%22tagIds%22:%5B%5D%7D%2C%7B%22point%22:%5B52387%2C61932%2C1314%5D%2C%22type%22:%22point%22%2C%22id%22:%22d

005ca669a485e2c2944b8032ff5e076e2a9c98c%22%2C%22tagIds%22:%5B%5D%7D%2C%7B%22point%  
22:%5B51050%2C60444%2C1399%5D%2C%22type%22:%22point%22%2C%22id%22:%22f2cf5b42541c3  
aa989e6ace20b9235b0430f5346%22%2C%22tagIds%22:%5B%5D%7D%2C%7B%22point%22:%5B50189  
%2C59931%2C1409%5D%2C%22type%22:%22point%22%2C%22id%22:%22e952e9044ace6353dcc5913  
4a90d0ecf4d3501c6%22%2C%22tagIds%22:%5B%5D%7D%2C%7B%22point%22:%5B50985%2C60322%2  
C1409%5D%2C%22type%22:%22point%22%2C%22id%22:%22d0f5749c0c4fb47482d061ba2d16fe7b2f4  
81148%22%2C%22tagIds%22:%5B%5D%7D%2C%7B%22point%22:%5B50415%2C59830%2C1424%5D%2  
C%22type%22:%22point%22%2C%22id%22:%22c1e2a5893b5bc303f4ef281522d7d483abc2cfd9%22%2C  
%22tagIds%22:%5B%5D%7D%2C%7B%22point%22:%5B51903%2C61461%2C1398%5D%2C%22type%22:  
%22point%22%2C%22id%22:%2230037ce680d39a84c7180080cc1a84ce64127564%22%2C%22tagIds%2  
2:%5B%5D%7D%2C%7B%22point%22:%5B52158%2C61858%2C1391%5D%2C%22type%22:%22point%2  
2%2C%22id%22:%22f6316e9daaba4ea9e26a5566974f9453bb00f78%22%2C%22tagIds%22:%5B%5D%7  
D%2C%7B%22point%22:%5B53069%2C62843%2C1360%5D%2C%22type%22:%22point%22%2C%22id%  
22:%22a54648719bf9422f75804be04804f64f0f1df728%22%2C%22tagIds%22:%5B%5D%7D%2C%7B%22  
point%22:%5B52558%2C62218%2C1364%5D%2C%22type%22:%22point%22%2C%22id%22:%22f5dfdc2  
d97f939a29df989e199f08da36dd56234%22%2C%22tagIds%22:%5B%5D%7D%2C%7B%22point%22:%5B  
52967%2C62773%2C1364%5D%2C%22type%22:%22point%22%2C%22id%22:%222086ccf1f1bf9091b06  
cba20d8d127ed4dae3348%22%2C%22tagIds%22:%5B%5D%7D%2C%7B%22point%22:%5B51031%2C62  
594%2C1264%5D%2C%22type%22:%22point%22%2C%22id%22:%229002a995efbcbeaff6f8b3c62f75e5d  
7908c9843%22%2C%22tagIds%22:%5B%5D%7D%2C%7B%22point%22:%5B51514%2C62744%2C1252%  
5D%2C%22type%22:%22point%22%2C%22id%22:%2254f5b6053c314f172830f99f45f24cd81c74c002%2  
2%2C%22tagIds%22:%5B%5D%7D%2C%7B%22point%22:%5B51063%2C62532%2C1258%5D%2C%22typ  
e%22:%22point%22%2C%22id%22:%22df0db5c483f4ca47885ae03e8eed93e715a39fdb%22%2C%22tagl  
ds%22:%5B%5D%7D%2C%7B%22point%22:%5B51637%2C62773%2C1246%5D%2C%22type%22:%22poi  
nt%22%2C%22id%22:%22d512328fbac7b2af7c2efdbeee4018d5ee9d890af%22%2C%22tagIds%22:%5B%5  
D%7D%2C%7B%22point%22:%5B70367%2C45486%2C1535%5D%2C%22type%22:%22point%22%2C%22  
id%22:%22801649f4f1f94075ebcdf6ecf30762927c7c24ad%22%2C%22tagIds%22:%5B%5D%7D%2C%7B  
%22point%22:%5B70277%2C45327%2C1524%5D%2C%22type%22:%22point%22%2C%22id%22:%2267e  
ca844aa48dbd87e0b962126646497f889a61%22%2C%22tagIds%22:%5B%5D%7D%2C%7B%22point%2  
2:%5B70502%2C45855%2C1524%5D%2C%22type%22:%22point%22%2C%22id%22:%2242b0a6bdc7bc4  
cc4cd68fed395f8caef8fd8e067%22%2C%22tagIds%22:%5B%5D%7D%2C%7B%22point%22:%5B70509%  
2C45879%2C1531%5D%2C%22type%22:%22point%22%2C%22id%22:%2209bdb41e201e64619720eb55  
b07746de12fa2dc3%22%2C%22tagIds%22:%5B%5D%7D%2C%7B%22point%22:%5B70499%2C45872%2  
C1536%5D%2C%22type%22:%22point%22%2C%22id%22:%22054d7ca6c391f5d8216080347348a43dfcb  
41d7c%22%2C%22tagIds%22:%5B%5D%7D%2C%7B%22point%22:%5B70193%2C45225%2C1517%5D%2  
C%22type%22:%22point%22%2C%22id%22:%2293ee1db7aab5e553e0bf80845331fd62b0cf6bfd%22%2  
C%22tagIds%22:%5B%5D%7D%2C%7B%22point%22:%5B70408%2C45727%2C1517%5D%2C%22type%2  
2:%22point%22%2C%22id%22:%22dee0faa7c2d3c725561266fed3a467cefc531b6c%22%2C%22tagIds%2  
2:%5B%5D%7D%2C%7B%22point%22:%5B70114%2C45137%2C1512%5D%2C%22type%22:%22point%2  
2%2C%22id%22:%228aaffd2ebd99e618b656c9bcac268fd8fad1b19e%22%2C%22tagIds%22:%5B%5D%7  
D%2C%7B%22point%22:%5B70335%2C45585%2C1512%5D%2C%22type%22:%22point%22%2C%22id%  
22:%223a67bc8e5f68540f518846f9c59e5006dd8a5411%22%2C%22tagIds%22:%5B%5D%7D%2C%7B%2  
2point%22:%5B70275%2C45446%2C1507%5D%2C%22type%22:%22point%22%2C%22id%22:%224b9db  
f266922093ec9bd874c050184d125ff2d8c%22%2C%22tagIds%22:%5B%5D%7D%2C%7B%22point%22:%

5B70057%2C45049%2C1507%5D%2C%22type%22:%22point%22%2C%22id%22:%2242e9cbb5126ebae83babd11486a5ee3ef45424f3%22%2C%22tagIds%22:%5B%5D%7D%2C%7B%22point%22:%5B70237%2C45420%2C1502%5D%2C%22type%22:%22point%22%2C%22id%22:%22d4b786f4d07d55e5f03b7b74a550e06efac83742%22%2C%22tagIds%22:%5B%5D%7D%2C%7B%22point%22:%5B70016%2C44947%2C1502%5D%2C%22type%22:%22point%22%2C%22id%22:%22db9ce5354304adf6e676901df8dd3abbdbde0c4c6%22%2C%22tagIds%22:%5B%5D%7D%2C%7B%22point%22:%5B69792%2C44260%2C1496%5D%2C%22type%22:%22point%22%2C%22id%22:%22b1e7e56d916c29228098de87e4df37c88dfa47a4%22%2C%22tagIds%22:%5B%5D%7D%2C%7B%22point%22:%5B69969%2C44876%2C1496%5D%2C%22type%22:%22point%22%2C%22id%22:%2239840824b4bac3a47d24de68cf6b4cfd5ce0b871%22%2C%22tagIds%22:%5B%5D%7D%2C%7B%22point%22:%5B70190%2C45337%2C1496%5D%2C%22type%22:%22point%22%2C%22id%22:%22df3c43bd662e1d6eb7e798eec4847e49256a8585%22%2C%22tagIds%22:%5B%5D%7D%2C%7B%22point%22:%5B70139%2C45251%2C1491%5D%2C%22type%22:%22point%22%2C%22id%22:%22727830af4364217c21e9ccf53392431c90c5171b%22%2C%22tagIds%22:%5B%5D%7D%2C%7B%22point%22:%5B69745%2C44166%2C1491%5D%2C%22type%22:%22point%22%2C%22id%22:%22df7b8a461487ea7cba483a70b4d82431f518b852%22%2C%22tagIds%22:%5B%5D%7D%2C%7B%22point%22:%5B69725%2C44012%2C1486%5D%2C%22type%22:%22point%22%2C%22id%22:%225f627ba9122460b14e6eafb84c07cfb173ec9c31%22%2C%22tagIds%22:%5B%5D%7D%2C%7B%22point%22:%5B70122%2C45262%2C1486%5D%2C%22type%22:%22point%22%2C%22id%22:%22c48e36c2cef57d658344db571ea3a9905f079e15%22%2C%22tagIds%22:%5B%5D%7D%2C%7B%22point%22:%5B69988%2C44911%2C1499%5D%2C%22type%22:%22point%22%2C%22id%22:%2240e8cd87b1aafc67113d8506320ad5791edcab c2%22%2C%22tagIds%22:%5B%5D%7D%2C%7B%22point%22:%5B69954%2C44791%2C1495%5D%2C%22type%22:%22point%22%2C%22id%22:%227033b1dfbb809ae5402e4ba9c58f2a6cd3f83353%22%2C%22tagIds%22:%5B%5D%7D%2C%7B%22point%22:%5B69951%2C44999%2C1480%5D%2C%22type%22:%22point%22%2C%22id%22:%22294721ba9b8d3f89be0d2a77c21796a49c880adc%22%2C%22tagIds%22:%5B%5D%7D%2C%7B%22point%22:%5B69639%2C43886%2C1480%5D%2C%22type%22:%22point%22%2C%22id%22:%22aff2cf0a0183ff35ce740bfc9527ad47492f370c%22%2C%22tagIds%22:%5B%5D%7D%2C%7B%22point%22:%5B69888%2C44882%2C1475%5D%2C%22type%22:%22point%22%2C%22id%22:%222927f67c5f81ebbcdf9d86e74890bbaf1f51b11bf%22%2C%22tagIds%22:%5B%5D%7D%2C%7B%22point%22:%5B69686%2C43816%2C1475%5D%2C%22type%22:%22point%22%2C%22id%22:%22f98374b26ee812c6df5d95ba9d0bc119458d8bfb%22%2C%22tagIds%22:%5B%5D%7D%2C%7B%22point%22:%5B69714%2C43724%2C1469%5D%2C%22type%22:%22point%22%2C%22id%22:%226b05a85569f0cc83b1d80e7dae3d9e8be5669e75%22%2C%22tagIds%22:%5B%5D%7D%2C%7B%22point%22:%5B69793%2C44804%2C1469%5D%2C%22type%22:%22point%22%2C%22id%22:%22e504e8642087a66680c03a0237662847d769c253%22%2C%22tagIds%22:%5B%5D%7D%2C%7B%22point%22:%5B65975%2C45619%2C2082%5D%2C%22type%22:%22point%22%2C%22id%22:%22542e92c3f69fb47c547681d3e472489cc733e51f%22%2C%22tagIds%22:%5B%5D%7D%2C%7B%22point%22:%5B66018%2C45619%2C2078%5D%2C%22type%22:%22point%22%2C%22id%22:%22cda5f3c56355d40a4bc83fbd52d4754e68b26399%22%2C%22tagIds%22:%5B%5D%7D%2C%7B%22point%22:%5B66132%2C45638%2C2073%5D%2C%22type%22:%22point%22%2C%22id%22:%220536b0eb946aa76a43fe0269b681f6eaf5ff572b%22%2C%22tagIds%22:%5B%5D%7D%2C%7B%22point%22:%5B66167%2C45641%2C2068%5D%2C%22type%22:%22point%22%2C%22id%22:%2200d17763513bf1a1cc73bab0c690c7b5c3244bc8%22%2C%22tagIds%22:%5B%5D%7D%2C%7B%22point%22:%5B66186%2C45650%2C2063%5D%2C%22type%22:%22point%22%2C%22id%22:%22f13efdae21def0e1d730f91f8eddc4a634a9ec54%22%2C%22tagIds%22:%5B%5D%7D%2C%7B%22point%22:%5B66220%2C45632%2C2058%5D%2C%22type%22:%22point%22%2C%22id%22:%22d782bccf73

4d9199aceb67694ca5dc9b5392cecd%22%2C%22tagIds%22:%5B%5D%7D%2C%7B%22point%22:%5B66280%2C45628%2C2053%5D%2C%22type%22:%22point%22%2C%22id%22:%221aea76d78c215446df09c7c1e88e273b3e5d9a27%22%2C%22tagIds%22:%5B%5D%7D%2C%7B%22point%22:%5B66364%2C45618%2C2047%5D%2C%22type%22:%22point%22%2C%22id%22:%220ebdb85334152ce1ffa9b5818e2cdd417246026%22%2C%22tagIds%22:%5B%5D%7D%2C%7B%22point%22:%5B66415%2C45615%2C2042%5D%2C%22type%22:%22point%22%2C%22id%22:%22ef891a28342994dc778067024c5a83ad62801180%22%2C%22tagIds%22:%5B%5D%7D%2C%7B%22point%22:%5B66456%2C45590%2C2037%5D%2C%22type%22:%22point%22%2C%22id%22:%22a12fd58ad9d147029a5b7c03ff306e01add59cae%22%2C%22tagIds%22:%5B%5D%7D%2C%7B%22point%22:%5B66514%2C45566%2C2032%5D%2C%22type%22:%22point%22%2C%22id%22:%22165115513f6bf49c82787a83681b2a3d91da94c2%22%2C%22tagIds%22:%5B%5D%7D%2C%7B%22point%22:%5B66580%2C45554%2C2027%5D%2C%22type%22:%22point%22%2C%22id%22:%22591561001866900fb0a86996a960c6334a85c21e%22%2C%22tagIds%22:%5B%5D%7D%2C%7B%22point%22:%5B66672%2C45538%2C2022%5D%2C%22type%22:%22point%22%2C%22id%22:%22d836e77ae68ca8aa1602123f9605a34eb5f57d30%22%2C%22tagIds%22:%5B%5D%7D%2C%7B%22point%22:%5B66728%2C45522%2C2017%5D%2C%22type%22:%22point%22%2C%22id%22:%22258ed4fcaa3309a5910604906ecc5a3e221b3c0f%22%2C%22tagIds%22:%5B%5D%7D%2C%7B%22point%22:%5B66779%2C45519%2C2012%5D%2C%22type%22:%22point%22%2C%22id%22:%22beba2bb67718afe470bafc40ab9cb213a623c436%22%2C%22tagIds%22:%5B%5D%7D%2C%7B%22point%22:%5B66832%2C45450%2C2006%5D%2C%22type%22:%22point%22%2C%22id%22:%225ac66b7388df37397cf84d3e9220b69b6977de2b%22%2C%22tagIds%22:%5B%5D%7D%2C%7B%22point%22:%5B66892%2C45475%2C2001%5D%2C%22type%22:%22point%22%2C%22id%22:%229a4475d882c70a88e87e0a2aeb55e54584cb87b4%22%2C%22tagIds%22:%5B%5D%7D%2C%7B%22point%22:%5B62879%2C47713%2C1184%5D%2C%22type%22:%22point%22%2C%22id%22:%2288052cdd1f52d6bd8ecfa33c41b2057f73df9e7b%22%2C%22tagIds%22:%5B%5D%7D%2C%7B%22point%22:%5B62302%2C48300%2C1184%5D%2C%22type%22:%22point%22%2C%22id%22:%2278351f08488fcf0731dd21a67dbc2b7c730c277a%22%2C%22tagIds%22:%5B%5D%7D%2C%7B%22point%22:%5B62892%2C47710%2C1177%5D%2C%22type%22:%22point%22%2C%22id%22:%22e6722cc06312d165283dfdadea504387d7f87960%22%2C%22tagIds%22:%5B%5D%7D%2C%7B%22point%22:%5B62346%2C48309%2C1177%5D%2C%22type%22:%22point%22%2C%22id%22:%2299c12a6e97cfd9fb754cce85c9e9ad5fa3997ac5%22%2C%22tagIds%22:%5B%5D%7D%2C%7B%22point%22:%5B62908%2C47706%2C1166%5D%2C%22type%22:%22point%22%2C%22id%22:%22b1f2d625539d78f7b747f5f486f0c68a8065d0ec%22%2C%22tagIds%22:%5B%5D%7D%2C%7B%22point%22:%5B62393%2C48278%2C1166%5D%2C%22type%22:%22point%22%2C%22id%22:%22302d177505228e75851c378b1e028e9474bfc4f8%22%2C%22tagIds%22:%5B%5D%7D%2C%7B%22point%22:%5B62793%2C48102%2C1251%5D%2C%22type%22:%22point%22%2C%22id%22:%224a2e0dcb958abd79f6fa02c6f2f9f4c3e3077f3d%22%2C%22tagIds%22:%5B%5D%7D%2C%7B%22point%22:%5B61956%2C48386%2C1251%5D%2C%22type%22:%22point%22%2C%22id%22:%2272fb02c81c6b7852044c6263e47ddbe517999306%22%2C%22tagIds%22:%5B%5D%7D%2C%7B%22point%22:%5B62833%2C48064%2C1241%5D%2C%22type%22:%22point%22%2C%22id%22:%223f80fcfcf122f285582b0507640295bae91ce2b1%22%2C%22tagIds%22:%5B%5D%7D%2C%7B%22point%22:%5B62066%2C48386%2C1241%5D%2C%22type%22:%22point%22%2C%22id%22:%2256872a7762267555b11c74cf23759f6358358d48%22%2C%22tagIds%22:%5B%5D%7D%2C%7B%22point%22:%5B62773%2C48285%2C1209%5D%2C%22type%22:%22point%22%2C%22id%22:%22629d9de4c832662330fc74cd175a98b75904235d%22%2C%22tagIds%22:%5B%5D%7D%2C%7B%22point%22:%5B62441%2C48392%2C1209%5D%2C%22type%22:%22point%22%2C%22id%22:%22823d84914ca91545d165753754b9182bedb7e24a%22%2C%22tagIds%22:%5B%5D%7D%2C%7B%22point%22:%5B6

2523%2C48389%2C1204%5D%2C%22type%22:%22point%22%2C%22id%22:%22153a71667be0ac9b5a9  
5679dc9ac877dbb5d3b7c%22%2C%22tagIds%22:%5B%5D%7D%2C%7B%22point%22:%5B62583%2C483  
55%2C1202%5D%2C%22type%22:%22point%22%2C%22id%22:%2244ffc63f1a7b8891156031685517e14  
521a503c2%22%2C%22tagIds%22:%5B%5D%7D%2C%7B%22point%22:%5B62681%2C48276%2C1202%5  
D%2C%22type%22:%22point%22%2C%22id%22:%22db1fd80e7105f88523f4f086327fcc9e9c1bfb5%22  
%2C%22tagIds%22:%5B%5D%7D%2C%7B%22point%22:%5B62737%2C48294%2C1214%5D%2C%22type  
%22:%22point%22%2C%22id%22:%22b011d144ece34542dbcfcd8459c5ca38ee1ccc2a%22%2C%22tagId  
s%22:%5B%5D%7D%2C%7B%22point%22:%5B62778%2C48285%2C1217%5D%2C%22type%22:%22poin  
t%22%2C%22id%22:%22fbc7e5537618de6884d292ae73e8a1d0def8afe7%22%2C%22tagIds%22:%5B%5  
D%7D%2C%7B%22point%22:%5B62803%2C48269%2C1220%5D%2C%22type%22:%22point%22%2C%22  
id%22:%2230401b783a5d32adb40a549c92478179e6fd4ca9%22%2C%22tagIds%22:%5B%5D%7D%2C%7  
B%22point%22:%5B62788%2C48272%2C1223%5D%2C%22type%22:%22point%22%2C%22id%22:%229f  
c9b2dec796e3030b3ca5fa697132630296658d%22%2C%22tagIds%22:%5B%5D%7D%2C%7B%22point%2  
2:%5B62772%2C48279%2C1226%5D%2C%22type%22:%22point%22%2C%22id%22:%2254f38a2e38752  
665985b3dfd2dcbad66ffcc8f31%22%2C%22tagIds%22:%5B%5D%7D%2C%7B%22point%22:%5B62788%  
2C48263%2C1229%5D%2C%22type%22:%22point%22%2C%22id%22:%228362cde60e5e38cc116b80d96  
42a5e3b55f5e18f%22%2C%22tagIds%22:%5B%5D%7D%2C%7B%22point%22:%5B62775%2C48279%2C1  
233%5D%2C%22type%22:%22point%22%2C%22id%22:%22d9c5171f18d7386501a3b401b216706fa8f37  
da4%22%2C%22tagIds%22:%5B%5D%7D%2C%7B%22point%22:%5B62737%2C48282%2C1237%5D%2C  
%22type%22:%22point%22%2C%22id%22:%229c33165185cc405451afa47858c89f4931b47574%22%2C  
%22tagIds%22:%5B%5D%7D%2C%7B%22point%22:%5B62737%2C48272%2C1241%5D%2C%22type%22:  
%22point%22%2C%22id%22:%22e0d9676e0b80141a1866ce2c6717a995a6734e38%22%2C%22tagIds%2  
2:%5B%5D%7D%2C%7B%22point%22:%5B62728%2C48257%2C1245%5D%2C%22type%22:%22point%2  
2%2C%22id%22:%220ab47166bc1dcc796e7f5f7b1572a712b8d3f553%22%2C%22tagIds%22:%5B%5D%7  
D%2C%7B%22point%22:%5B62734%2C48225%2C1247%5D%2C%22type%22:%22point%22%2C%22id%  
22:%22e1c9da28999cb5a93c687bc34140918e813aad4e%22%2C%22tagIds%22:%5B%5D%7D%2C%7B%  
22point%22:%5B62788%2C48089%2C1248%5D%2C%22type%22:%22point%22%2C%22id%22:%22286e  
d1405c20140601bde786aa6caf53174fb52e%22%2C%22tagIds%22:%5B%5D%7D%2C%7B%22point%22:  
%5B62740%2C48206%2C1250%5D%2C%22type%22:%22point%22%2C%22id%22:%220eac523f848381d  
bba07b538e269a9acea665daa%22%2C%22tagIds%22:%5B%5D%7D%2C%7B%22point%22:%5B63139%2  
C49292%2C2012%5D%2C%22type%22:%22point%22%2C%22id%22:%222977cd86195f957a10f32ef99b2  
27d6fff38be18%22%2C%22tagIds%22:%5B%5D%7D%2C%7B%22point%22:%5B63123%2C49295%2C201  
2%5D%2C%22type%22:%22point%22%2C%22id%22:%224a2c0dc23b3db5baf9ef3a3d7e838b800183fafd  
%22%2C%22tagIds%22:%5B%5D%7D%5D%2C%22annotationTags%22:%5B%5D%2C%22voxelSize%22:%  
5B4%2C4%2C40%5D%2C%22bracketShortcutsShowSegmentation%22:false%2C%22annotationSelection  
ShowsSegmentation%22:false%2C%22name%22:%22EC%20Junctions%22%7D%5D%2C%22navigation%  
22:%7B%22pose%22:%7B%22position%22:%7B%22voxelSize%22:%5B4%2C4%2C40%5D%2C%22voxelCo  
ordinates%22:%5B72710.484375%2C53091.01953125%2C2152.000732421875%5D%7D%7D%2C%22zo  
omFactor%22:40.99902501717963%7D%2C%22showAxisLines%22:false%2C%22perspectiveOrientation  
%22:%5B-0.05632186681032181%2C-0.11770738661289215%2C0.012483260594308376%2C-  
0.9913712739944458%5D%2C%22perspectiveZoom%22:6540.292140855514%2C%22layout%22:%22xy-  
3d%22%7D
